# Supplementary material for: Comprehensive androgen-dependent transcriptome analysis in human genital tissue
Source: Research Square preprint supplement (doi:10.21203/rs.3.rs-7083899/v1), 2025-07-23
Supplement: Supplementary file 1 [file 1f2db4033be2e3d530819d74.docx]

**Supplementary information**

supplementary file 1.

File format: DOCX (.docx.)

Description: Contains supplementary figures and tables.

supplementary file 2.

File format: XLSX (.xlsx)

Title of data: list of differentially expressed genes

Description: Contains the list of differentially expressed genes from both tissues at both time points

supplementary file 3

File format: XLSX (.xlsx)

Title of data: qPCR validation results

Description: Contains qPCR validation data for selected DEGs (STEAP4, MYOCD, FAM105A, FAM107A, HSD11B1, FKBP5)

supplementary file 4

File format: XLSX (.xlsx)

Title of data: qPCR validation results

Description: Contains the list of significantly enriched Gene Ontology (GO) biological process terms identified in foreskin and scrotum samples based on differentially expressed genes.

supplementary file 5

File format: PDF (.pdf)

Title of data: Ethical approval documentation
