# Supplementary material for: Comprehensive androgen-dependent transcriptome analysis in human genital tissue
Source: Research Square preprint supplement (doi:10.21203/rs.3.rs-7083899/v1), 2025-07-23
Supplement: Supplementary file 2 [file 3ece458e3370915c540a9bcd.xlsx]

## Sheet: Sheet2
VALIDATION DATA qpcr
								GSF-35	GSF-28	GSF-119	GSF-139	GSF-156	GSF-73
Sample ID	DHT/EtOH	Gene name					MYOCD	7.94474	1.55833	5.29636	8.28212	1.01045	1.05702
GSF-35	7.94474	MYOCD					FKBP5	1.91189	4.05584	3.85038	3.70635	0.873573	0.976032
GSF-28	1.55833						HSD11B1	3.05252	1.58008	3.605	4.51586	0.798298	0.926588
GSF-119	5.29636						FAM105A	3.73213	2.30537	4.70763	4.02782	1.01396	1.03526
GSF-139	8.28212						FAM107A	4.92458	4.89056	7.21	10.4107
GSF-156	1.01045						STEAP4	17.4481	14.6213	20.4638	40.0853
GSF-73	1.05702
GSF-35	1.91189	FKBP5
GSF-28	4.05584
GSF-119	3.85038
GSF-139	3.70635
GSF-156	0.873573
GSF-73	0.976032
GSF-35	3.05252	HSD11B1
GSF-28	1.58008
GSF-119	3.605
GSF-139	4.51586
GSF-156	0.798298
GSF-73	0.926588
GSF-35	3.73213	FAM105A
GSF-28	2.30537
GSF-119	4.70763
GSF-139	4.02782
GSF-156	1.01396
GSF-73	1.03526
GSF-35	4.92458	FAM107A
GSF-28	4.89056
GSF-119	7.21
GSF-139	10.4107
GSF-156	1.10957
GSF-73
GSF-35	17.4481	STEAP4
GSF-28	14.6213
GSF-119	20.4638
GSF-139	40.0853
GSF-156
GSF-73
