# Supplementary material for: Comprehensive androgen-dependent transcriptome analysis in human genital tissue
Source: Research Square preprint supplement (doi:10.21203/rs.3.rs-7083899/v1), 2025-07-23
Supplement: Supplementary file 5 [file 9533263336149e7f9cec1252.xlsx]

## Sheet: Glossary
Sheet Name	Description
GSF-F_48h_1	This sheet contains DEGs identified in GSF-F at 48h between DHT and EtOH conditions (p<0.05)
GSF-F_48h_2	This sheet presents separately up-regulated and down-regulated DEGs in GSF-F at 48h (DHT vs EtOH). Genes with log2FC > 0 are up-regulated, while those with log2FC < 0 are down-regulated (p < 0.05)
GSF-F_72h_1	This sheet contains DEGs identified in GSF-F at 72h between DHT and EtOH conditions (p < 0.05)
GSF-F_72h_2	This sheet presents separately up-regulated and down-regulated DEGs in GSF-F at 72h (DHT vs EtOH). Genes with log2FC > 0 are up-regulated, while those with log2FC < 0 are down-regulated (p < 0.05)
GSF-S_48h_1	This sheet contains DEGs identified in GSF-S at 48h between DHT and EtOH conditions (p < 0.05)
GSF-S_48h_2	This sheet presents separately up-regulated and down-regulated DEGs in GSF-S at 48h (DHT vs EtOH). Genes with log2FC > 0 are up-regulated, while those with log2FC < 0 are down-regulated (p < 0.05)
GSF-S_72h_1	This sheet contains all DEGs identified in GSF-S at 72h between DHT and EtOH conditions (p < 0.05)
GSF-S_72h_2	This sheet presents separately up-regulated and down-regulated DEGs in GSF-S at 72h (DHT vs EtOH). Genes with log2FC > 0 are up-regulated, while those with log2FC < 0 are down-regulated (p < 0.05)
GSF-L.Min_48h_1	This sheet includes all the DEGs detected at 48h, along with their up-regulation and down-regulation status (DHT vs. EtOH) in GSF-L (CAIS). Genes with a log2FC > 0 are up-regulated, while those with a log2FC < 0 are down-regulated (p < 0.05)
GSF-L.Min_72h_1	This sheet includes all the DEGs detected at 72h, along with their up-regulation and down-regulation status (DHT vs. EtOH) in GSF-L (CAIS). Genes with a log2FC > 0 are up-regulated, while those with a log2FC < 0 are down-regulated (p < 0.05)
GSF-L.Maj_48h_1	This sheet includes all the DEGs detected at 48h, along with their up-regulation and down-regulation status (DHT vs. EtOH) in GSF-L (CAIS). Genes with a log2FC > 0 are up-regulated, while those with a log2FC < 0 are down-regulated (p < 0.05)
GSF-L.Maj_72h_1	This sheet includes all the DEGs detected at 72h, along with their up-regulation and down-regulation status (DHT vs. EtOH) in GSF-L (CAIS). Genes with a log2FC > 0 are up-regulated, while those with a log2FC < 0 are down-regulated (p < 0.05)
Log2fc 0.5	Includes names of genes that passed stringent filtering (Log2FC ≤ –0.5 or ≥ +0.5, p < 0.05) in each tissue at both time points, with commonly up- or down-regulated genes across all four tissues.

## Sheet: GSF-F_48h_1
	GSF.F_DHT_48h mean	GSF.F_DHT_72h mean	GSF.F_EtOH_48h mean	GSF.F_EtOH_72h mean	FoldChange	log2FoldChange	pvalue	padj	Overall mean	stat
AOX1	2198.49	2356.67	983.524	962.964	2.13333	1.09311	5.16303e-103	7.45748e-99	1625.41	21.5512
FAM107A	386.643	470.761	59.1724	79.7724	3.98016	1.99283	2.00432e-87	1.44752e-83	249.087	19.8199
SAMHD1	899.338	833.142	428.939	443.816	1.93557	0.952756	1.19806e-51	5.76824e-48	651.309	15.1199
PSMD8	1941.57	1952.45	1370.51	1467.18	1.39602	0.481317	2.825e-51	1.02011e-47	1682.93	15.0633
APOD	1001.5	1246.56	316.031	352.076	2.50525	1.32495	5.5545e-51	1.60458e-47	729.043	15.0185
SLC12A2	1302.94	1436.17	813.721	876.645	1.60132	0.679264	6.9497e-39	1.67302e-35	1107.37	13.0432
CAT	2388.96	2221.26	1444.11	1243.62	1.59619	0.674631	1.57746e-38	3.25498e-35	1824.49	12.9805
CERS6	750.648	895.315	357.541	388.172	1.92284	0.943239	3.80722e-38	6.87394e-35	597.919	12.9129
SLC38A11	382.739	318.286	127.5	106.483	2.23597	1.1609	4.68724e-33	7.52249e-30	233.752	11.977
REV3L	3863.13	3868.27	2856.15	2793.27	1.36357	0.447391	6.22141e-33	8.9862e-30	3345.2	11.9535
ADAMTS1	7090.89	6720.91	4092.41	3677.72	1.65342	0.725454	7.58473e-32	9.95943e-29	5395.48	11.744
FAM105A	201.712	168.849	60.0178	42.5441	2.37857	1.25009	3.34139e-31	4.02192e-28	118.281	11.6179
FKBP5	148.517	138.255	38.4695	32.6139	2.41856	1.27415	1.71683e-30	1.90753e-27	89.4639	11.4772
IMPA2	494.033	551.845	196.74	199.655	2.03915	1.02797	2.36362e-30	2.43858e-27	360.568	11.4496
IDH1	3659.44	3490.46	2848.52	2684.9	1.27561	0.351182	4.03352e-29	3.88401e-26	3170.83	11.201
LITAF	2613.28	2613.3	3262.52	3262.13	-1.24531	-0.316507	4.86693e-29	4.39362e-26	2937.81	-11.1843
MYOCD	203.062	222.342	44.5982	31.0123	2.31112	1.20859	1.04981e-27	8.9197e-25	125.254	10.9085
IRS2	2286.58	2254.2	1493.96	1547.01	1.50748	0.592141	3.36816e-27	2.60529e-24	1895.44	10.802
LINC00968	636.694	783.983	316.322	447.88	1.85087	0.888202	3.42706e-27	2.60529e-24	546.22	10.8004
PTPLB	878.854	1019.69	546.387	624.554	1.53678	0.619914	5.52125e-27	3.98744e-24	767.373	10.7565
ABTB2	275.294	243.969	143.513	168.623	1.75761	0.813612	1.60904e-26	1.10671e-23	207.85	10.6575
NEXN	1588.04	1742.68	1059.76	1238.73	1.46111	0.547065	4.0982e-26	2.69065e-23	1407.3	10.5702
ERCC6	1425.13	1673.1	937.9	1096.35	1.49313	0.578339	2.51635e-25	1.58027e-22	1283.12	10.3986
MFAP4	1536.29	1502.17	2405.09	2534.78	-1.50658	-0.591277	1.84946e-24	1.11307e-21	1994.58	-10.2068
PRELP	2929.43	3452.36	4549.9	5681.15	-1.51035	-0.594881	1.2121e-23	7.00303e-21	4153.21	-10.0226
RHOJ	621.129	810.071	989.693	1310.04	-1.51766	-0.601848	1.3571e-23	7.53921e-21	932.732	-10.0115
STEAP4	522.861	575.611	21.953	16.7914	1.46013	0.546094	4.84751e-23	2.59324e-20	284.304	9.88476
GCNT1	648.811	617.232	360.903	354.542	1.67966	0.748165	1.2332e-22	6.36155e-20	495.372	9.7908
CD36	90.9401	127.811	222.034	322.866	-1.91626	-0.938292	4.10173e-22	2.04294e-19	190.913	-9.66854
GLUL	5307.03	5171.03	3537.4	3295.9	1.42828	0.514279	5.69462e-22	2.74177e-19	4327.84	9.6349
HSD11B1	83.525	128.484	14.2142	28.4573	2.02048	1.0147	2.8458e-21	1.32596e-18	63.6702	9.46825
PHLDB1	3361.58	3353.63	2766.05	2766.52	1.21728	0.283658	4.84979e-21	2.18907e-18	3061.95	9.41239
SMARCD2	985.553	911.786	761.507	702.841	1.29412	0.371973	7.12715e-21	3.11953e-18	840.422	9.37185
PDLIM1	1174.07	956.48	773.781	615.895	1.46878	0.554619	8.72006e-21	3.70449e-18	880.056	9.35054
SULF1	9326.86	7341.7	6334.04	4273.03	1.49201	0.57726	1.34847e-20	5.56496e-18	6818.91	9.30432
STC1	155.517	102.45	360.811	205.598	-1.89231	-0.920149	5.05659e-20	2.02882e-17	206.094	-9.1628
ROR1	656.089	587.02	472.992	467.076	1.37362	0.457983	2.2895e-19	8.93771e-17	545.794	8.99844
DKK1	13242.5	11720.5	9522.73	8157.43	1.36438	0.448243	3.17989e-19	1.1777e-16	10660.8	8.9623
SOCS2	186.662	147.413	346.009	280.813	-1.69871	-0.764443	3.15558e-19	1.1777e-16	240.224	-8.96314
NID1	5376.16	4759.07	3991.32	3319.43	1.3609	0.44456	4.15898e-19	1.50181e-16	4361.49	8.93266
DIO2	159.399	161.334	47.2557	38.6181	2.02015	1.01446	4.35997e-19	1.53598e-16	101.652	8.92744
CILP	447.324	623.853	218.092	274.65	1.73573	0.795544	2.61569e-18	8.99548e-16	390.98	8.72698
NID2	3324.57	2920.96	2302.57	2028.27	1.41574	0.501559	4.12324e-18	1.38502e-15	2644.09	8.67534
UACA	2511.42	2049.77	3153.17	2366.51	-1.26477	-0.338878	6.37938e-18	2.09418e-15	2520.22	-8.62553
RGMB	2882.16	2823.82	4153.09	4124.56	-1.39009	-0.475179	8.82123e-18	2.83142e-15	3495.91	-8.58837
NR2F1	560.051	552.207	349.355	303.297	1.52445	0.608292	9.89094e-18	3.10575e-15	441.228	8.57521
IGFBP2	164.649	235.444	69.2276	86.5091	1.82918	0.871195	1.07989e-17	3.3187e-15	138.957	8.56509
DPY19L4	1674.74	1771.92	1273.38	1362.69	1.30515	0.384217	1.47598e-17	4.44146e-15	1520.68	8.52902
GALNT2	3989.04	3867.27	3229.02	3111.15	1.20992	0.274914	2.45464e-17	7.23569e-15	3549.12	8.46997
THBS1	85621.6	80296.8	61254	60173.8	1.36557	0.449508	2.57493e-17	7.43844e-15	71836.5	8.46439
ZHX3	2461.94	2386.01	2014.58	2005.62	1.217	0.283324	2.69876e-17	7.64331e-15	2217.04	8.45892
DSEL	1634.78	1754.58	2025.88	2040.09	-1.24826	-0.319916	6.23712e-17	1.73248e-14	1863.83	-8.36065
MAOA	159.006	171.397	64.3598	77.118	1.82659	0.869154	1.5138e-16	4.12554e-14	117.97	8.25541
CTB-167B5.2	33.8687	63.0036	1.96019	1.57679	1.81626	0.860973	2.41359e-16	6.45591e-14	25.1023	8.19951
TCN2	511.291	524.582	335.892	353.221	1.50817	0.592801	3.43484e-16	9.02052e-14	431.247	8.15699
SNX18	1498.93	1576.52	1871.74	1945.02	-1.2266	-0.294667	3.89267e-16	1.00403e-13	1723.05	-8.14186
CCDC68	88.6111	96.2733	17.2131	20.9674	1.89997	0.925973	4.10248e-16	1.03958e-13	55.7662	8.1355
CD82	622.218	599.888	407.014	371.082	1.47092	0.556719	4.59818e-16	1.1451e-13	500.051	8.12167
GRIA1	416.667	540.684	257.875	343.817	1.56904	0.649878	9.85019e-16	2.41146e-13	389.761	8.02871
ADCY3	1601.58	1701.18	1216.89	1201.19	1.29833	0.376661	1.46922e-15	3.5369e-13	1430.21	7.9795
HS6ST1	805.521	823.311	535.664	581.282	1.44415	0.530223	1.64278e-15	3.88989e-13	686.445	7.96571
ENPP1	884.395	735.101	425.967	311.204	1.6593	0.730575	1.96168e-15	4.57009e-13	589.167	7.94374
TMEM184C	929.372	950.083	697.921	711.048	1.31119	0.390874	2.47685e-15	5.67866e-13	822.106	7.91478
MYO1D	1230.49	1317.25	1770.22	1909.14	-1.39707	-0.482403	3.6442e-15	8.2245e-13	1556.77	-7.8666
LMO4	725.056	670.143	536.477	510.739	1.31953	0.400027	4.44403e-15	9.87533e-13	610.604	7.84172
SORBS1	104.332	128.829	42.4675	42.1856	1.7949	0.843905	4.68993e-15	1.02638e-12	79.4536	7.83496
SQRDL	1126.29	1124.36	758.794	782.596	1.45064	0.536685	5.13438e-15	1.10688e-12	948.011	7.82358
NR3C1	2239.85	2311.97	2676.2	2712.11	-1.18206	-0.241302	5.51989e-15	1.17249e-12	2485.03	-7.81446
KIAA0922	236.408	195.932	393.078	339.687	-1.53885	-0.621854	7.4597e-15	1.56156e-12	291.276	-7.77643
NISCH	2932.99	2745.07	2335.61	2235.69	1.24638	0.317749	8.08362e-15	1.668e-12	2562.34	7.76626
CRISPLD2	167.448	125.536	76.9052	61.5544	1.74929	0.806769	9.28383e-15	1.88867e-12	107.861	7.7487
S1PR1	152.875	146.464	69.795	68.5041	1.75398	0.810635	1.01133e-14	2.02883e-12	109.41	7.73782
CHST2	527.188	523.313	336.665	347.932	1.4563	0.542307	1.2366e-14	2.44677e-12	433.775	7.71221
TMEM109	1630.52	1851.34	1261.64	1532.79	1.27314	0.348391	1.76268e-14	3.44056e-12	1569.07	7.66685
TENM3	578.504	571.255	340.192	336.876	1.57351	0.653984	2.90298e-14	5.59075e-12	456.707	7.60257
FBN2	8634.81	8997.43	6468.88	7066.68	1.36183	0.445548	3.26216e-14	6.19983e-12	7791.95	7.58747
SEPT11	13331.5	12609	15872.6	15473.2	-1.19375	-0.255499	4.69226e-14	8.80195e-12	14321.6	-7.54021
DAPK1	581.364	673.678	397.04	495.378	1.47501	0.560727	5.67911e-14	1.03834e-11	536.865	7.51528
RASL11A	73.7897	53.1242	27.129	20.636	1.83931	0.879168	5.66856e-14	1.03834e-11	43.6697	7.51552
SAV1	1114.18	1014.46	894.921	820.77	1.23126	0.30014	1.87395e-13	3.38341e-11	961.081	7.35749
KCNIP3	326.285	336.185	214.184	242.333	1.45323	0.539261	2.59147e-13	4.62114e-11	279.747	7.31408
PPP3CA	1241.14	1156.06	967.761	947.286	1.25951	0.332862	2.6918e-13	4.7415e-11	1078.06	7.30898
PRCP	2645.99	2684.23	2025.1	1929.77	1.28564	0.362488	5.39002e-13	9.37993e-11	2321.27	7.21509
CREB3L2	2277.22	2176.6	1872.67	1915.88	1.20784	0.272432	5.99063e-13	1.0301e-10	2060.59	7.2007
ATP1A2	71.2631	75.556	21.0212	25.0234	1.74474	0.803013	7.74239e-13	1.31566e-10	48.2159	7.16564
LGMN	1824.75	1726.95	1426.4	1399.2	1.25582	0.328627	8.88454e-13	1.49219e-10	1594.33	7.14677
F10	1457.81	1671.26	1034.76	1114.3	1.39003	0.475111	1.14369e-12	1.89879e-10	1319.53	7.11201
SACS	1692.65	1560.75	2130.48	2152.82	-1.23892	-0.309084	1.66675e-12	2.73574e-10	1884.17	-7.05986
KIF26B	405.433	354.222	190.53	157.56	1.64535	0.718395	1.76599e-12	2.86607e-10	276.936	7.05181
MT2A	1469.25	946.715	898.086	548.861	1.48127	0.56683	2.10556e-12	3.37918e-10	965.728	7.02731
XYLT1	1011.39	903.837	786.695	736.009	1.26071	0.334241	2.98692e-12	4.741e-10	859.484	6.97834
IRAK3	528.642	513.673	382.373	374.59	1.34862	0.431484	3.03519e-12	4.76525e-10	449.82	6.97609
ATP13A3	3021.13	3260.37	3622.57	3862.2	-1.19233	-0.253789	3.2291e-12	4.98352e-10	3441.57	-6.96737
DRAM1	2322.41	2422.53	3040.09	3398.78	-1.28125	-0.357551	3.24322e-12	4.98352e-10	2795.95	-6.96676
NPR3	382.872	475.617	180.154	217.448	1.65248	0.724636	3.48414e-12	5.29736e-10	314.023	6.95667
BACH1	1559.73	1508.04	2023.79	1928.69	-1.29059	-0.368025	5.93477e-12	8.92935e-10	1755.07	-6.88121
L1CAM	187.171	185.974	284.33	289.666	-1.5628	-0.644135	1.00905e-11	1.50255e-09	236.785	-6.80521
CNN3	2979.57	2925.88	2395.12	2414.86	1.21956	0.286359	1.02051e-11	1.5041e-09	2678.86	6.80358
ZFHX3	848.943	903.936	655.013	771.354	1.27665	0.352368	1.14704e-11	1.67353e-09	794.811	6.78673
WLS	2050.41	2025.59	2481.22	2385.09	-1.20197	-0.265404	1.33317e-11	1.92563e-09	2235.58	-6.76499
PSD4	253.897	211.439	151.685	142.632	1.51887	0.602998	1.40441e-11	2.00844e-09	189.913	6.75745
ELFN2	374.96	331.613	553.599	507.03	-1.40407	-0.48962	1.5972e-11	2.26176e-09	441.801	-6.73878
CDKL1	166.815	149.986	103.942	103.569	1.51711	0.601321	1.6289e-11	2.28425e-09	131.078	6.73593
NPTX1	258.474	242.818	589.508	659.708	-1.6736	-0.742951	2.01844e-11	2.8033e-09	437.627	-6.70468
NOV	1834.36	1926.46	2403.35	2623.36	-1.30369	-0.382602	2.05226e-11	2.82313e-09	2196.88	-6.70226
NRP2	502.088	556.182	365.87	397.033	1.36474	0.448623	2.16257e-11	2.94681e-09	455.293	6.6946
CD302	682.551	804.914	533.313	606.574	1.28016	0.356319	2.72419e-11	3.6774e-09	656.838	6.66076
PPAP2B	7842.95	9689.29	5981.49	7224.37	1.33144	0.412986	3.73573e-11	4.99619e-09	7684.52	6.6142
IL6ST	10157.2	10604.3	11856	12507.3	-1.16658	-0.222288	4.18106e-11	5.54048e-09	11281.2	-6.59752
TMEM64	408.091	376.086	264.5	270.277	1.44691	0.532972	4.94272e-11	6.49024e-09	329.739	6.57265
BMPER	424.71	409.185	563.99	576.201	-1.32118	-0.401827	5.53649e-11	7.20442e-09	493.522	-6.55574
PKDCC	179.488	183.862	99.1446	103.24	1.584	0.663574	6.92041e-11	8.92486e-09	141.434	6.52237
TBC1D16	2052.36	1899.48	1715.32	1656.06	1.19143	0.252689	7.27222e-11	9.29557e-09	1830.81	6.51493
CDC37L1	312.727	323.084	216.071	212.751	1.39001	0.475096	7.43819e-11	9.42432e-09	266.158	6.51154
SYNJ2	813.961	700.745	994.617	796.517	-1.21298	-0.278554	8.2427e-11	1.03528e-08	826.46	-6.4961
STIM1	1531.96	1450.84	1211.23	1200.31	1.26183	0.335515	1.0466e-10	1.3032e-08	1348.59	6.46006
OSBPL3	1869.78	1787.79	2192.84	2012.28	-1.16583	-0.221362	1.07674e-10	1.32926e-08	1965.67	-6.45577
ATP1A1	5631.43	5504.55	4625.23	4597.36	1.19669	0.259051	1.12759e-10	1.38025e-08	5089.64	6.44877
NT5DC2	1564.71	1293.21	1199.49	1050.87	1.2813	0.35761	1.21983e-10	1.48061e-08	1277.07	6.43684
EEF2K	750.45	684.449	548.403	483.314	1.34822	0.431058	1.32518e-10	1.59508e-08	616.654	6.42425
PDZRN3	1799.32	1770.78	1306.25	1297.97	1.34112	0.423436	1.47076e-10	1.75567e-08	1543.58	6.40838
MVP	3549.13	3234.96	3957.31	3625.67	-1.12436	-0.169106	1.56903e-10	1.84252e-08	3591.77	-6.39851
THRB	423.196	427.89	285.693	334.787	1.39737	0.482717	1.55721e-10	1.84252e-08	367.891	6.39966
ITGA4	1413.51	1372.68	1018.28	1051.84	1.33287	0.414531	1.61793e-10	1.88462e-08	1214.08	6.39382
DAB2	4253.85	4393.92	4920.49	4926.96	-1.16489	-0.220198	1.6466e-10	1.90268e-08	4623.81	-6.39113
IL1R1	1835.75	1888.85	2433.05	2555.62	-1.29703	-0.375207	1.6605e-10	1.90351e-08	2178.32	-6.38985
SEC14L2	205.266	167.701	117.558	100.027	1.51385	0.598222	1.8776e-10	2.13543e-08	147.638	6.37103
ABCA8	316.407	528.723	189.817	260.935	1.52159	0.605582	2.03576e-10	2.29722e-08	323.97	6.35862
SHROOM3	1254.88	1071.95	1651.55	1421.8	-1.28912	-0.366391	2.42195e-10	2.71183e-08	1350.04	-6.33188
ANXA2	27190.8	23883.4	24198.4	21716.8	1.10668	0.146235	2.51152e-10	2.79049e-08	24247.3	6.32627
SNTB1	396.445	407.352	565.163	584.669	-1.36755	-0.451599	2.56086e-10	2.82359e-08	488.407	-6.32327
FAM20B	3854.4	4256.14	3150.78	3528.89	1.22139	0.288525	2.58992e-10	2.834e-08	3697.55	6.32153
ASPN	247.372	163.497	110.623	55.2545	1.6601	0.731274	2.6235e-10	2.838e-08	144.187	6.31954
PDIA5	800.756	775.641	631.491	604.741	1.25639	0.329283	2.63287e-10	2.838e-08	703.157	6.31898
COL5A2	13051.7	10890.3	11227.5	9459.5	1.18854	0.249193	2.88091e-10	3.08236e-08	11157.3	6.30506
POU2F2	227.986	243.47	329.193	356.602	-1.41522	-0.50103	3.48806e-10	3.70453e-08	289.313	-6.27537
COL3A1	62796.9	44450.4	45216.3	33154.3	1.38048	0.465173	3.72025e-10	3.92228e-08	46404.5	6.26533
SIX2	425.352	480.707	265.128	338.669	1.46868	0.554519	3.98292e-10	4.16879e-08	377.464	6.2547
RNF24	1584.88	1499.68	1181.42	1163.5	1.2961	0.374179	4.25072e-10	4.41708e-08	1357.37	6.24453
SUN1	2721.21	2903.48	3135.45	3001.59	-1.13657	-0.184683	4.28444e-10	4.42032e-08	2940.43	-6.2433
GLRX	1313.24	1196.12	956.342	898.699	1.30236	0.38113	4.82117e-10	4.93879e-08	1091.1	6.22482
ABCA6	460.379	449.34	295.188	267.874	1.45349	0.539521	5.97895e-10	6.08169e-08	368.195	6.19098
SBF2-AS1	313.484	293.034	450.831	396.513	-1.37605	-0.46053	6.85512e-10	6.92415e-08	363.465	-6.1694
ADRA1B	60.0239	54.649	27.5835	30.7499	1.61947	0.695526	7.65134e-10	7.67472e-08	43.2516	6.152
ZBTB2	472.354	420.282	594.603	498.856	-1.23126	-0.300137	9.80596e-10	9.76809e-08	496.524	-6.11254
IPO5	3817.97	3746.65	4419.67	4403.14	-1.15779	-0.211371	1.00147e-09	9.86318e-08	4096.85	-6.10918
LTBP1	5121.11	4292.41	3894.99	3053.43	1.27131	0.346313	1.0038e-09	9.86318e-08	4090.48	6.1088
NTN4	2729.27	3484.63	2131.75	2580.13	1.23345	0.302695	1.06399e-09	1.03839e-07	2731.44	6.0995
COLGALT2	56.8744	61.9023	118.62	107.452	-1.58774	-0.666975	1.2089e-09	1.1719e-07	86.2123	-6.07906
STON1	1204.64	1194.8	813.443	817.641	1.39709	0.482426	1.23669e-09	1.19085e-07	1007.63	6.07541
FRAS1	364.647	378.517	239.717	281.466	1.40272	0.488226	1.35047e-09	1.2918e-07	316.087	6.06127
OXTR	921.867	881.169	686.259	607.234	1.36952	0.453665	1.88551e-09	1.79173e-07	774.132	6.00738
ADCY4	251.898	232.052	378.071	412.853	-1.38972	-0.474794	2.0047e-09	1.89254e-07	318.718	-5.99743
PAPSS2	2256.41	2193.21	2618.55	2499.53	-1.15875	-0.212571	2.02544e-09	1.8997e-07	2391.92	-5.99575
MAP2K3	857.771	800.431	1075.29	1059.42	-1.25818	-0.331342	2.18578e-09	2.03687e-07	948.229	-5.98336
RCAN2	487.36	487.767	700.395	701.313	-1.33532	-0.417188	2.28798e-09	2.11844e-07	594.209	-5.97592
MAPRE2	552.484	504.477	745.525	664.856	-1.32254	-0.403309	2.60535e-09	2.39692e-07	616.836	-5.95471
DNAJB4	1041.32	1141.2	798.612	819.681	1.27844	0.354381	2.73267e-09	2.49814e-07	950.204	5.9469
LIN7A	273.621	276.656	162.539	184.375	1.48671	0.572126	3.03305e-09	2.75531e-07	224.298	5.9298
TFPI	2036.43	2163.86	1815.29	1948.32	1.13635	0.18441	3.42886e-09	3.0954e-07	1990.97	5.90963
ITGB3	940.558	994.215	721.063	738.473	1.28384	0.360467	3.47966e-09	3.12176e-07	848.577	5.9072
FAM198B	1521.14	1903.68	948.828	1270.84	1.45951	0.545485	4.27458e-09	3.81123e-07	1411.12	5.8732
MYLK	5843.25	4619.28	4889.21	4101.15	1.22199	0.28923	4.38801e-09	3.88837e-07	4863.22	5.86886
SUN2	1806.25	1845.15	1479.05	1551.27	1.20722	0.271687	4.51011e-09	3.97219e-07	1670.43	5.86431
UNC13B	697.486	811.752	849.191	978.59	-1.21546	-0.281504	4.69874e-09	4.11325e-07	834.254	-5.8575
MBNL2	921.025	889.606	699.465	710.929	1.27809	0.353995	5.37314e-09	4.67528e-07	805.256	5.83518
STK24	2072.57	1943.7	1630.27	1453.82	1.25137	0.323506	6.0699e-09	5.24992e-07	1775.09	5.81482
MAP3K7CL	117.09	153.928	171.315	210.315	-1.39385	-0.479072	6.14104e-09	5.27983e-07	163.162	-5.81287
RGS2	320.787	249.299	179.282	116.01	1.51049	0.59502	6.26256e-09	5.35245e-07	216.344	5.80959
BMP2K	588.919	643.951	744.209	854.213	-1.2327	-0.301824	8.30229e-09	7.05402e-07	707.823	-5.7622
PKP4	699.503	844.706	899.055	1092.41	-1.261	-0.334563	9.48599e-09	8.01261e-07	883.919	-5.73967
PLEKHA5	749.548	733.289	580.424	578.079	1.28036	0.356547	9.74795e-09	8.13869e-07	660.335	5.73506
SYNE3	300.218	298.72	408.138	358.361	-1.30975	-0.389286	9.70217e-09	8.13869e-07	341.359	-5.73585
STC2	7539.35	8294.72	5941.69	6669.09	1.248	0.319619	1.2628e-08	1.04827e-06	7111.21	5.69102
HUNK	50.3267	52.093	104.725	101.445	-1.55593	-0.637781	1.31921e-08	1.08884e-06	77.1473	-5.68356
DNM1	1097.03	935.578	1487.04	1244.39	-1.31658	-0.396796	1.35219e-08	1.10972e-06	1191.01	-5.67934
KIAA1377	317.651	297.678	228.496	242.937	1.35296	0.436122	1.40783e-08	1.14239e-06	271.691	5.67243
SLC1A3	65.1426	115.091	109.163	163.923	-1.47029	-0.556098	1.40317e-08	1.14239e-06	113.33	-5.673
PTPN13	2985.88	2979.79	3395.72	3363.34	-1.12752	-0.173157	1.56999e-08	1.26687e-06	3181.18	-5.65373
TNS3	1325.39	1302.81	961.357	1003.96	1.29972	0.378202	1.6416e-08	1.3173e-06	1148.38	5.64607
ATP8B1	1530.49	1589.39	1784.53	1830.03	-1.17034	-0.226925	1.74887e-08	1.39561e-06	1683.61	-5.63517
RGCC	494.954	451.966	214	195.172	1.5597	0.641272	1.7801e-08	1.41273e-06	339.023	5.63212
RPS6KA2	3444.42	3585.38	2838.26	2899.85	1.21332	0.278957	1.79486e-08	1.41666e-06	3191.97	5.63069
TMEM158	222.009	186.025	344.631	319.299	-1.41298	-0.498736	1.84744e-08	1.45024e-06	267.991	-5.62571
PKIG	763.829	683.566	956.621	882.384	-1.24745	-0.318984	1.89051e-08	1.47602e-06	821.6	-5.62173
TRAK2	1941.83	1970.33	1615.42	1717.67	1.18751	0.247934	1.9187e-08	1.48999e-06	1811.31	5.61918
ADAMTS2	1995.99	1663.11	1714.08	1465.14	1.16615	0.221749	1.93687e-08	1.49605e-06	1709.58	5.61755
ATG14	529.048	551.554	706.174	624.165	-1.28245	-0.358902	2.17346e-08	1.65311e-06	602.735	-5.5976
CSDC2	310.76	222.487	469.992	367.836	-1.39435	-0.479597	2.1567e-08	1.65311e-06	342.769	-5.59894
YEATS2	1016.65	1093.98	826.52	924.045	1.22294	0.29035	2.17455e-08	1.65311e-06	965.299	5.59751
NREP	962.695	832.75	1353.02	1182.36	-1.31403	-0.394002	2.27468e-08	1.72018e-06	1082.71	-5.5897
STK17A	787.914	788.177	965.932	936.284	-1.22689	-0.295008	2.7353e-08	2.05774e-06	869.577	-5.55759
EPB41L2	2867.88	2747.76	3406	3276.61	-1.1594	-0.213377	2.78112e-08	2.08137e-06	3074.56	-5.55469
GRB10	708.81	682.658	866.274	815.328	-1.21478	-0.280693	2.86005e-08	2.12941e-06	768.267	-5.5498
ZDHHC9	1375.56	1291.01	1077.91	1079.72	1.22751	0.295736	2.97018e-08	2.20006e-06	1206.05	5.54319
MMP1	1743.82	973.955	3548.64	2405.75	-1.53391	-0.617213	3.50524e-08	2.58315e-06	2168.04	-5.51412
MXRA5	3087.71	2957.87	4150.29	4251.24	-1.28335	-0.35991	3.71184e-08	2.72151e-06	3611.78	-5.50404
DCLK1	545.809	508.64	402.145	362.258	1.35329	0.436473	4.0684e-08	2.96788e-06	454.713	5.48786
NLRP1	999.383	957.174	1218.16	1144.64	-1.20067	-0.263845	4.39897e-08	3.1929e-06	1079.84	-5.47404
TRAM2	4622.83	3944.96	4148.92	3811.52	1.11279	0.154178	5.1134e-08	3.6929e-06	4132.06	5.44732
ATP2B4	8537.28	8233.98	9909.08	9928.47	-1.15561	-0.208658	5.92112e-08	4.25496e-06	9152.2	-5.42117
HPS5	576.628	644.168	414.996	472.857	1.29923	0.377653	5.9788e-08	4.27514e-06	527.163	5.41943
CA12	520.587	534.276	681.102	677.925	-1.28571	-0.362567	6.09186e-08	4.33452e-06	603.472	-5.41608
COL8A1	1323.87	1199.36	981.975	803.407	1.2834	0.359967	6.21407e-08	4.3998e-06	1077.15	5.41253
CEP170	1922.02	1835.59	2317.18	2140.32	-1.20032	-0.263424	6.30216e-08	4.44041e-06	2053.78	-5.41001
ITGA5	6360.83	5851.29	5507.34	5114.59	1.13469	0.182303	6.63054e-08	4.6491e-06	5708.51	5.40091
FGD4	570.013	614.897	452.676	490.906	1.26006	0.333493	7.65926e-08	5.34446e-06	532.123	5.37498
SORT1	673.619	779.667	507.044	574.259	1.29016	0.367555	8.33184e-08	5.76395e-06	633.647	5.35979
TOX	258.704	222.115	175.305	170.176	1.38384	0.468677	8.34024e-08	5.76395e-06	206.575	5.35961
NEGR1	1059.97	1478.96	860.536	1180.36	1.23275	0.301878	8.4341e-08	5.80105e-06	1144.95	5.35759
MPZL1	2648.15	2680.27	2205.61	2273.62	1.18158	0.240722	8.75183e-08	5.99106e-06	2451.91	5.3509
DUSP4	51.3898	50.6928	91.1409	97.5915	-1.4784	-0.564035	9.43803e-08	6.43033e-06	72.7037	-5.33722
FGF13	68.3296	64.6359	119.338	106.652	-1.47197	-0.557747	9.70834e-08	6.58344e-06	89.7388	-5.3321
EREG	155.638	156.091	226.4	229.176	-1.39834	-0.483716	9.84715e-08	6.5948e-06	191.826	-5.32952
MMP19	563.542	485.968	448.149	398.196	1.25103	0.323115	9.86207e-08	6.5948e-06	473.964	5.32925
PLTP	1100.49	1199.42	923.438	1024.97	1.19528	0.25735	9.84134e-08	6.5948e-06	1062.08	5.32963
TACC1	2051.28	2115.16	1606.69	1628.15	1.24708	0.318553	1.05529e-07	7.02426e-06	1850.32	5.31694
LAMB1	7033.74	5148.69	8528.72	6614.07	-1.21468	-0.28058	1.10492e-07	7.32083e-06	6831.31	-5.30857
MOXD1	8529.91	7243.84	7384.7	6611.9	1.14131	0.190686	1.14909e-07	7.57871e-06	7442.59	5.30142
PRICKLE2	639.644	588.043	484.066	446.62	1.27842	0.354366	1.21138e-07	7.95325e-06	539.593	5.29177
ACKR3	443.027	486.074	303.073	332.891	1.39857	0.483952	1.21707e-07	7.95448e-06	391.266	5.29091
CHRM2	967.213	843.608	749.231	742.228	1.31092	0.390582	1.22856e-07	7.99341e-06	825.57	5.28919
NEBL	64.3908	57.1221	14.8047	11.5766	1.55122	0.633403	1.25134e-07	8.1051e-06	36.9735	5.28583
ENTPD4	1408.38	1452.39	1205.36	1208.18	1.15308	0.205488	1.39487e-07	8.99439e-06	1318.58	5.26592
CPM	52.6591	51.9262	116.886	110.178	-1.52129	-0.605296	1.48241e-07	9.51643e-06	82.9121	-5.25473
ELL2	2733.45	2917.33	2110.47	2362.58	1.24039	0.310799	1.54756e-07	9.8907e-06	2530.96	5.24681
LEPREL1	160.2	182.603	97.2877	96.6746	1.44583	0.531899	1.66811e-07	1.06142e-05	134.191	5.23297
LIPA	4918.66	4298.21	5662.08	4641.57	-1.1522	-0.204389	1.80148e-07	1.14125e-05	4880.13	-5.21874
CHST10	198.262	233.002	129.455	165.889	1.39091	0.476024	1.84118e-07	1.15974e-05	181.652	5.2147
SFT2D2	984.833	906.623	819.283	779.69	1.19891	0.261728	1.84672e-07	1.15974e-05	872.607	5.21414
FLNB	2712.96	2933.71	2105.52	2174.07	1.24978	0.321678	1.87604e-07	1.17305e-05	2481.57	5.21122
COL4A1	3038.18	2611.19	2598.1	2299.2	1.16491	0.220224	1.90743e-07	1.18754e-05	2636.67	5.20814
ITGB5	4180.2	4269.35	3620.63	3563.5	1.15557	0.208601	2.17025e-07	1.34537e-05	3908.42	5.18413
REEP6	66.1808	52.6559	25.3844	22.5297	1.5124	0.596843	2.19443e-07	1.35455e-05	41.6877	5.18206
OMD	177.752	244.624	108.859	113.426	1.46165	0.547601	2.27861e-07	1.40052e-05	161.165	5.17504
ENTPD7	180.703	190.466	253.342	261.838	-1.34022	-0.422469	2.31509e-07	1.41692e-05	221.587	-5.17207
GPSM2	673.478	659.778	834.132	803.82	-1.23854	-0.308644	2.34202e-07	1.42135e-05	742.802	-5.16991
NIPAL3	2461.12	2454.46	1975.46	2041.58	1.23184	0.300815	2.33667e-07	1.42135e-05	2233.15	5.17034
ANKRD13A	2587.05	2304.67	2978.96	2624.42	-1.15042	-0.202166	2.44103e-07	1.47524e-05	2623.77	-5.16217
TRAK1	1507.67	1504.56	1788.99	1728.77	-1.17741	-0.235619	2.46582e-07	1.48401e-05	1632.5	-5.16028
PAM	9065.2	8779.93	10328.6	10221.1	-1.15178	-0.203865	2.48419e-07	1.48886e-05	9598.71	-5.15889
SCN8A	828.03	925.507	978.74	1027.33	-1.17341	-0.230707	2.49639e-07	1.48999e-05	939.903	-5.15797
CALD1	20348.9	19643.7	17981.7	18610.2	1.12227	0.16642	2.83622e-07	1.68262e-05	19146.1	5.13402
SOCS2-AS1	21.8669	20.2749	49.0837	37.9317	-1.49234	-0.577575	2.84242e-07	1.68262e-05	32.2893	-5.13361
KCNB1	263.291	383.858	157.359	252.944	1.42619	0.512171	2.92497e-07	1.72442e-05	264.363	5.12822
PTN	1547.12	1681.49	1211.41	1101.91	1.25835	0.331536	3.02435e-07	1.77576e-05	1385.48	5.12192
MYADM	4478.06	4146.49	3830.75	3781.66	1.15882	0.21266	3.0648e-07	1.79222e-05	4059.24	5.11942
SNED1	919.073	713.471	718.479	551.277	1.2587	0.331934	3.25905e-07	1.89814e-05	725.575	5.10782
OGN	496.234	393.471	374.113	264.651	1.40355	0.489081	3.27384e-07	1.89909e-05	382.117	5.10696
LRCH2	311.041	332.956	224.858	218.529	1.32691	0.408071	3.30909e-07	1.91186e-05	271.846	5.10493
MAP3K5	139.059	127.203	201.923	181.657	-1.36804	-0.45211	3.68668e-07	2.12153e-05	162.461	-5.08446
ARHGAP17	1105.21	952.959	1279.94	1176.04	-1.15516	-0.208092	3.78384e-07	2.16533e-05	1128.54	-5.07952
COL7A1	2907.65	2594.1	2428.54	2026.2	1.18126	0.240329	3.79277e-07	2.16533e-05	2489.12	5.07907
ARID5A	458.741	497.765	626.814	693.401	-1.30953	-0.389047	3.95089e-07	2.24672e-05	569.18	-5.07131
FGF5	773.008	679.304	1033.29	839.526	-1.28353	-0.360114	4.06929e-07	2.30497e-05	831.281	-5.06569
NRP1	3992.45	3518.84	3273.03	2840.83	1.20146	0.264786	4.21853e-07	2.38017e-05	3406.29	5.05882
EML1	1267.74	1148.12	1487.55	1271.3	-1.17411	-0.231573	4.26486e-07	2.39695e-05	1293.68	-5.05674
MBNL1	3533.48	3566.39	3190.22	3223.72	1.10719	0.146903	4.42091e-07	2.47502e-05	3378.45	5.04988
AFAP1L1	234.721	290.522	160.828	192.43	1.37398	0.458364	4.44611e-07	2.47952e-05	219.625	5.04879
EOGT	573.82	618.562	459.788	507.131	1.21804	0.284565	4.65185e-07	2.58428e-05	539.825	5.04014
CNTN3	290.324	236.919	391.174	341.426	-1.29892	-0.377307	5.44164e-07	3.01146e-05	314.961	-5.01005
RAB3B	3123.79	2639.25	3784.42	3388.79	-1.19284	-0.254398	5.63297e-07	3.10544e-05	3234.06	-5.00339
ENTPD6	953.89	961.746	804.441	808.316	1.16198	0.216582	5.75379e-07	3.15999e-05	882.098	4.9993
WDR26	2264.33	2232.92	2548.56	2518.02	-1.12476	-0.169614	5.86044e-07	3.20637e-05	2390.96	-4.99576
NOTCH3	2387.71	2339.38	1997.61	2039.66	1.18985	0.250778	6.26169e-07	3.41297e-05	2191.09	4.98297
MLTK	2252.25	2130.76	2640.56	2543.85	-1.16352	-0.218492	6.35944e-07	3.44029e-05	2391.85	-4.97997
PRPS1	341.092	312.606	454.139	420.471	-1.28951	-0.366825	6.35939e-07	3.44029e-05	382.077	-4.97997
FIBIN	167.47	152.976	104.12	103.315	1.40717	0.492802	6.42472e-07	3.45009e-05	131.97	4.97799
SCAP	969.011	980.11	832.244	922.483	1.1575	0.211015	6.42532e-07	3.45009e-05	925.962	4.97797
SLC1A5	4022.08	4340.39	3217.52	3479.28	1.19926	0.262149	6.96122e-07	3.72399e-05	3764.82	4.96244
USP53	4489.24	5424.42	5424.56	6556.02	-1.2126	-0.278109	7.04746e-07	3.75622e-05	5473.56	-4.96005
KRT19	2426.9	2028.31	2989.19	2285.34	-1.23993	-0.31026	7.13275e-07	3.7877e-05	2432.43	-4.95771
LRRC32	842.465	821.591	1000.2	1070.82	-1.19527	-0.257338	7.39651e-07	3.91338e-05	933.77	-4.95065
SVIL	3602.81	3788	4243.45	4484.27	-1.17098	-0.227722	7.51895e-07	3.96364e-05	4029.63	-4.94746
NCS1	1081.95	1082.52	1218.03	1271.95	-1.13738	-0.18572	7.79074e-07	4.09198e-05	1163.61	-4.94054
RP11-597D13.9	167.192	174.276	114.517	127.733	1.35929	0.442852	8.36269e-07	4.37648e-05	145.929	4.92671
RAPGEF6	616.094	556.178	762.496	712.967	-1.19182	-0.25317	8.49215e-07	4.42818e-05	661.933	-4.9237
PTGS1	5032.45	4186.08	3945.62	3170.21	1.2165	0.282731	8.72941e-07	4.53553e-05	4083.59	4.91831
DSP	1148.02	1117.61	931.963	921.706	1.18461	0.244411	9.18952e-07	4.74421e-05	1029.82	4.90824
MYO10	1112.32	944.487	1428.78	1217.65	-1.26471	-0.338812	9.19675e-07	4.74421e-05	1175.81	-4.90809
ABHD17C	228.724	222.621	309.529	287.693	-1.29043	-0.367853	9.92751e-07	5.10295e-05	262.142	-4.89307
ERRFI1	953.504	888.467	745.018	658.384	1.2447	0.315803	9.97443e-07	5.10889e-05	811.343	4.89214
EPB41L3	1161.14	1075.67	1391.65	1308.03	-1.20426	-0.268143	1.01762e-06	5.19381e-05	1234.12	-4.8882
TMEM200A	583.433	520.519	733.659	695.737	-1.2653	-0.339482	1.10164e-06	5.60285e-05	633.337	-4.87256
ITPK1	1273.14	1250.08	1069.07	1099.89	1.18592	0.246006	1.17433e-06	5.95156e-05	1173.04	4.85992
TCF12	1953.71	1875.94	1607.52	1627.87	1.18674	0.247009	1.1848e-06	5.98365e-05	1766.26	4.85816
CCDC85A	52.1175	42.9399	19.8522	24.6954	1.47087	0.556672	1.1905e-06	5.99149e-05	34.9012	4.85721
RABGAP1	1638.2	1819.31	1400.43	1551.15	1.17304	0.230248	1.19542e-06	5.99534e-05	1602.27	4.8564
TRIM2	1838.11	1872.31	2153.55	2231.83	-1.1672	-0.223052	1.22275e-06	6.1112e-05	2023.95	-4.85192
UBASH3B	517.92	546.027	400.737	483.943	1.23567	0.305291	1.23804e-06	6.1663e-05	487.157	4.84945
LZTS3	349.296	338.83	260.027	305.702	1.29729	0.375503	1.25619e-06	6.23521e-05	313.464	4.84656
CXCL12	3993	3371.92	4909.5	3752.19	-1.19445	-0.256342	1.37741e-06	6.81344e-05	4006.65	-4.82825
AKAP12	11613	10144.1	14044.1	12547.5	-1.16265	-0.217418	1.51376e-06	7.46239e-05	12087.2	-4.80941
PRSS23	7372.59	7168.1	6006.75	5653.89	1.20536	0.269468	1.52833e-06	7.50856e-05	6550.33	4.8075
GNPTAB	901.596	1030.47	1074.91	1204.87	-1.17766	-0.235924	1.55246e-06	7.60125e-05	1052.96	-4.80436
ADAMTS14	154.98	168.479	218.083	217.877	-1.31488	-0.394936	1.67149e-06	8.15643e-05	189.855	-4.78956
DHRS3	154.451	103.878	100.06	81.4953	1.41299	0.498749	1.6921e-06	8.22921e-05	109.971	4.7871
ZNF469	833.602	755.66	661.663	668.506	1.22393	0.291519	1.6995e-06	8.23742e-05	729.858	4.78622
LRRC2	233.042	333.366	345.904	434.169	-1.34286	-0.425312	1.71268e-06	8.24598e-05	336.62	-4.78467
PRPS2	335.878	336.602	261.786	275.138	1.25722	0.330236	1.71124e-06	8.24598e-05	302.351	4.78484
MRPS6	813.054	933.412	979.234	1077.93	-1.19139	-0.252651	1.76341e-06	8.46202e-05	950.906	-4.7788
PCDH18	7581.92	7010.2	6755.82	6268.54	1.13791	0.186391	1.87106e-06	8.94887e-05	6904.12	4.76687
TNFRSF21	293.328	274.653	362.279	334.807	-1.24182	-0.312458	2.02156e-06	9.63675e-05	316.267	-4.75126
WNT5A	6184.63	6377.41	4830.04	5199.24	1.22914	0.297646	2.03512e-06	9.66952e-05	5647.83	4.7499
AKAP2	3285.05	3223.92	3763.97	3690.17	-1.15436	-0.207087	2.06467e-06	9.77771e-05	3490.78	-4.74699
TMEM237	800.654	833.482	665.25	688.261	1.19372	0.255466	2.13455e-06	0.000100757	746.912	4.74025
FAM171B	537.375	513.979	678.132	603.346	-1.22388	-0.291464	2.32481e-06	0.00010938	583.208	-4.72292
SERPINB6	1851.07	1597.33	2146.29	1766.58	-1.1402	-0.189288	2.36701e-06	0.000111004	1840.32	-4.71926
COL12A1	21113.7	23264.2	15786.2	18271.6	1.29063	0.368072	2.43088e-06	0.00011363	19608.9	4.71384
PDGFD	376.255	671.84	240.374	337.162	1.37953	0.464177	2.46949e-06	0.000115062	406.408	4.71063
GPR176	2896.12	2879.68	3127.57	3084.82	-1.10411	-0.14288	2.62707e-06	0.000121231	2997.05	-4.69801
HLX	123.332	143.713	77.5776	93.2938	1.38729	0.472269	2.62076e-06	0.000121231	109.479	4.6985
KLF3	1529.01	1738.2	1796.42	1870.85	-1.13552	-0.183357	2.62384e-06	0.000121231	1733.62	-4.69826
CTSC	3434.18	3402.61	2659.9	2467.97	1.22447	0.29216	2.7663e-06	0.00012725	2991.17	4.68745
TMEM87B	1105.66	1136.55	1264.16	1221.1	-1.14602	-0.196636	2.79707e-06	0.000128257	1181.87	-4.68519
DDX3X	3547.94	3816.58	3907.87	4066.12	-1.09738	-0.134057	2.8073e-06	0.000128318	3834.63	-4.68444
RBPJ	2224.16	2299.08	1948.4	2029.05	1.13894	0.187686	2.9537e-06	0.000134584	2125.17	4.67401
DIEXF	470.28	476.416	569.516	560.535	-1.19462	-0.256552	2.98497e-06	0.000135581	519.187	-4.67185
GALNT15	601.091	646.824	382.377	424.56	1.38836	0.473384	3.05502e-06	0.000138328	513.713	4.66709
LAMA2	2545.5	2793.98	1821.67	2030.09	1.33179	0.413367	3.07189e-06	0.000138658	2297.81	4.66595
RBBP8	334.315	389.305	253.314	268.557	1.27379	0.349123	3.13283e-06	0.000140968	311.373	4.66191
MAML2	902.727	820.876	767.115	736.742	1.16582	0.221344	3.18834e-06	0.00014302	806.865	4.6583
CFL2	1704.46	1657.75	1902.22	1700.65	-1.11775	-0.160597	3.5176e-06	0.000157301	1741.27	-4.63802
LAMC1	24593.3	23874.1	21495.4	20883.9	1.13488	0.182541	3.59248e-06	0.000160154	22711.7	4.63367
VCL	11663.5	11598.1	10371.4	10412.7	1.11629	0.158715	3.66212e-06	0.000162756	11011.4	4.62969
PEMT	255.883	264.108	184.676	182.625	1.29843	0.376773	3.74717e-06	0.000166025	221.823	4.62493
OR7E47P	22.6983	28.3734	6.64644	7.43503	1.36494	0.448838	3.7762e-06	0.000166799	16.2883	4.62333
TMEM45A	646.337	644.119	528.978	547.785	1.20085	0.264057	3.86471e-06	0.000169728	591.805	4.61853
ZNF219	668.516	863.68	483.449	722.863	1.31435	0.394344	3.866e-06	0.000169728	684.627	4.61846
WNT2	2384.77	2805.56	3170.4	3578.85	-1.2457	-0.316955	3.96292e-06	0.000173456	2984.89	-4.61332
PDE5A	1494.05	1365.46	1879.34	1555.42	-1.21418	-0.279978	4.06586e-06	0.000177424	1573.57	-4.60799
CLMP	1786.32	1749.07	2110.88	2036.58	-1.18223	-0.241511	4.10765e-06	0.000177638	1920.71	-4.60586
CTNNAL1	721.592	644.584	839.594	735.504	-1.16857	-0.224742	4.10126e-06	0.000177638	735.319	-4.60618
SMAD3	2610.18	2347.14	2967.83	2536.27	-1.13312	-0.180297	4.09641e-06	0.000177638	2615.35	-4.60643
FZD7	1164.79	1024.66	1408.75	1316.01	-1.17691	-0.235007	4.17708e-06	0.000179032	1228.55	-4.60237
SGCD	1564	1767.23	1250.7	1442.44	1.23056	0.299319	4.16786e-06	0.000179032	1506.09	4.60283
TNFRSF19	568	510.17	714.226	677.925	-1.22787	-0.296152	4.1678e-06	0.000179032	617.58	-4.60283
TCEAL4	1665.7	1583.24	1412.88	1349.48	1.17091	0.227626	4.25102e-06	0.000181662	1502.83	4.59872
SAMD4A	1376.87	1520.04	1542.65	1777.87	-1.12831	-0.174168	4.28034e-06	0.000182375	1554.36	-4.59728
CSRP2	200.64	192.497	286.193	282.085	-1.31593	-0.396084	4.37706e-06	0.000185796	240.354	-4.59262
MAP4K4	5847.1	5418.55	6761.33	6035.55	-1.15683	-0.210171	4.38635e-06	0.000185796	6015.63	-4.59218
PAPSS1	1232.25	1175.69	1081.74	1021.94	1.13091	0.177479	4.44034e-06	0.000187533	1127.91	4.58963
SLC35A3	458.862	531.334	371.459	416.2	1.21284	0.278395	4.65578e-06	0.000196059	444.464	4.57973
CNIH3	71.802	55.2167	118.394	96.7679	-1.41511	-0.500914	4.68821e-06	0.00019685	85.5451	-4.57828
SLC4A7	745.437	708.044	912.693	800.861	-1.20266	-0.266233	4.95408e-06	0.000207411	791.759	-4.56672
FOLR3	20.0687	26.3851	47.0014	53.2779	-1.4139	-0.499678	5.0684e-06	0.000210921	36.6833	-4.56194
HIGD1A	1012.13	1031.13	853.184	898.193	1.16852	0.224679	5.07148e-06	0.000210921	948.658	4.56181
SLC25A1	1748.16	1547.96	1480.45	1477.78	1.15545	0.208457	5.08173e-06	0.000210921	1563.58	4.56139
NUMBL	1793.66	1704.28	1538.21	1557.35	1.17353	0.230859	5.1696e-06	0.000213953	1648.38	4.55778
MTHFD2	2059.07	1966.09	1665.31	1585.91	1.22057	0.287553	5.34069e-06	0.000219775	1819.09	4.55094
WNT5B	1543.27	1376.64	1281.59	1229.27	1.15905	0.212938	5.3357e-06	0.000219775	1357.69	4.55114
DOCK1	2253.95	2241.75	2514.08	2533.59	-1.10627	-0.145705	5.4117e-06	0.000222064	2385.84	-4.54816
ACAD11	772.405	875.224	909.556	918.893	-1.16727	-0.223143	5.4357e-06	0.000222417	869.019	-4.54723
ECM2	605.911	667.342	524.05	500.743	1.25216	0.324421	5.94379e-06	0.00024252	574.512	4.52838
MRC2	13449.2	12026.1	11796.7	10241.6	1.13843	0.187047	5.99782e-06	0.00024335	11878.4	4.52647
SERPINB7	125.885	74.2927	187.302	126.508	-1.39798	-0.483346	5.99625e-06	0.00024335	128.497	-4.52652
ITPKB	217.981	238.31	293.154	323.459	-1.2852	-0.361993	6.0329e-06	0.000244087	268.226	-4.52523
BAALC	248.623	177.881	375.565	291.08	-1.37241	-0.456707	6.30438e-06	0.000254359	273.287	-4.51592
CNST	426.283	408.52	539.296	510.427	-1.24257	-0.313332	6.45643e-06	0.000259768	471.131	-4.51086
LY96	83.66	81.9483	127.369	144.428	-1.36343	-0.447242	6.6285e-06	0.00026595	109.351	-4.50528
JAK1	3347.58	3038.72	3741.8	3469.76	-1.10426	-0.143078	6.81293e-06	0.000272593	3399.46	-4.49945
TNPO1	5328.75	5706.75	4756.88	5047.61	1.11419	0.15599	6.88087e-06	0.000274551	5210	4.49734
KIF23	199.142	160.376	259.222	229.437	-1.26632	-0.340638	6.92355e-06	0.000275492	212.044	-4.49603
GAS1	923.651	941.089	711.917	731.373	1.24807	0.319697	7.17494e-06	0.000284006	827.008	4.48843
KANK1	1175.02	1321.72	1345.04	1480.07	-1.12917	-0.175268	7.17683e-06	0.000284006	1330.46	-4.48838
APRT	629.78	637.598	493.421	476.143	1.22988	0.298521	7.23407e-06	0.000285489	559.236	4.48668
RND3	5998.9	5636.71	7120.1	6741.76	-1.17734	-0.23553	7.39944e-06	0.000291219	6374.37	-4.48186
LPPR4	126.483	160.258	192.87	242.223	-1.34109	-0.42341	7.6582e-06	0.000300584	180.459	-4.47452
CEBPD	273.337	251.69	188.054	199.295	1.34089	0.423194	7.75521e-06	0.000303567	228.094	4.47183
MFAP2	1284.49	1223.67	1145.12	1131.61	1.13815	0.186687	7.79405e-06	0.000304263	1196.22	4.47076
ADPRH	106.764	107.404	68.893	69.8271	1.37672	0.461234	7.82918e-06	0.000304811	88.2222	4.4698
NTRK2	79.0482	99.9085	140.582	177.191	-1.40565	-0.491241	7.92857e-06	0.00030785	124.182	-4.4671
TYRO3	530.195	568.116	420.664	434.426	1.22427	0.291924	8.08624e-06	0.00031313	488.35	4.46289
NR2F2	2612.38	2376.62	2250.91	2110.52	1.14397	0.19405	8.22143e-06	0.000317514	2337.61	4.45934
BZW2	577.812	523.391	708.604	621.421	-1.20161	-0.264968	8.27217e-06	0.000318622	607.807	-4.45802
FSTL1	35371.7	36432.8	30599.5	30854.2	1.15768	0.211233	8.3378e-06	0.000320296	33314.6	4.45632
MFSD6	722.391	696.421	594.843	568.635	1.21375	0.279475	8.42826e-06	0.000322912	645.573	4.45401
PPL	2628.84	2550.49	2303.17	2322.65	1.19499	0.256993	8.51682e-06	0.000325442	2451.29	4.45176
MAMLD1	515.732	594.73	710.847	850.04	-1.26302	-0.336874	8.6522e-06	0.000329742	667.837	-4.44838
TP53I11	749.762	758.782	914.631	973.144	-1.1941	-0.25592	8.73219e-06	0.000331915	849.08	-4.4464
PLAU	1033.98	791.178	1302.37	1108.53	-1.24189	-0.312534	9.50267e-06	0.000360253	1059.01	-4.42819
CASP1	139.337	156.99	191.821	212.743	-1.30383	-0.382761	9.57437e-06	0.000362021	175.223	-4.42657
AP2M1	5415.74	5093.75	5866.51	5639.05	-1.09124	-0.125968	9.67607e-06	0.000364912	5503.76	-4.42429
NRG1	109.465	122.226	145.248	155.715	-1.31368	-0.393609	9.87541e-06	0.000371459	133.164	-4.41988
ACSL4	1244.98	1272.7	1405.79	1357.98	-1.13363	-0.18095	9.93298e-06	0.000372654	1320.36	-4.41863
FEM1C	568.001	537.675	676.174	646.977	-1.1844	-0.244159	1.00814e-05	0.000377244	607.207	-4.41542
ACPL2	231.174	231.151	139.757	170.148	1.39026	0.475352	1.01712e-05	0.000379621	193.058	4.4135
LOX	34990.2	36409	29683.5	29924.9	1.16265	0.217422	1.02115e-05	0.000380143	32751.9	4.41265
MALL	178.205	141.711	240.915	178.958	-1.28064	-0.356862	1.03037e-05	0.000382588	184.947	-4.4107
TBC1D8	503.649	426.475	638.995	561.521	-1.25034	-0.322319	1.07658e-05	0.000398722	532.66	-4.40119
ASB5	171.299	233.717	213.18	279.744	-1.31661	-0.396825	1.1005e-05	0.000406163	224.485	-4.39642
SYNC	1410.07	1318.24	1595.89	1498.18	-1.12832	-0.174181	1.1023e-05	0.000406163	1455.59	-4.39607
LTBP4	2509.3	3035.76	1913.84	2263.31	1.28143	0.357752	1.12467e-05	0.000412159	2430.55	4.3917
PAK4	420.821	398.585	331.818	351.798	1.20981	0.274782	1.12337e-05	0.000412159	375.755	4.39195
TCF7	394.239	271.315	517.959	385.616	-1.27618	-0.351836	1.12713e-05	0.000412159	392.282	-4.39123
SLC1A4	487.395	518.449	376.193	408.969	1.22452	0.292212	1.14067e-05	0.000416056	447.751	4.38863
TSC22D3	804.227	933.743	641.189	727.953	1.23958	0.309851	1.22258e-05	0.000444811	776.778	4.37352
BMP2	43.9825	55.5809	74.5108	82.3749	-1.38984	-0.47492	1.24175e-05	0.000449518	64.1123	-4.37013
ZDHHC8	1323.7	1291.83	1088.26	1172.13	1.19154	0.252822	1.24055e-05	0.000449518	1218.98	4.37034
ACTG2	286.366	372.649	141.248	175.312	1.40192	0.487402	1.27089e-05	0.000458158	243.894	4.36506
CLIP4	1230.99	1237.24	1404.63	1351.88	-1.13618	-0.184193	1.27195e-05	0.000458158	1306.19	-4.36487
ITPR1	142.986	159.084	95.1277	97.8004	1.35633	0.43971	1.29254e-05	0.00046326	123.75	4.36136
LUM	19868.1	21638.2	24138	26156.5	-1.1648	-0.220088	1.29038e-05	0.00046326	22950.2	-4.36173
MARCH4	1074.9	1065.14	1290.95	1409.02	-1.20169	-0.265062	1.29888e-05	0.000464382	1210	-4.36029
CDH11	2607.9	2379.24	3027.7	2817.61	-1.1511	-0.203015	1.31564e-05	0.000469211	2708.11	-4.35749
SSB	1163.05	1202.52	1017.61	1006.31	1.1324	0.179388	1.33874e-05	0.000476275	1097.37	4.35368
TMEM173	751.518	724.614	954.756	942.708	-1.23548	-0.305068	1.36088e-05	0.000482962	843.399	-4.35008
GREM2	597.45	575.912	749.71	689.742	-1.25616	-0.329024	1.42463e-05	0.000504348	653.204	-4.34003
FNDC3A	2161.95	2161.14	1903.8	1975.33	1.13434	0.181858	1.43521e-05	0.000506852	2050.56	4.3384
METTL7A	440.176	442.476	344.672	290.581	1.24813	0.319769	1.45212e-05	0.000511572	379.476	4.33583
CLTB	1138.52	1149.21	934.95	1073.86	1.17472	0.232317	1.46357e-05	0.000514351	1074.13	4.3341
ANO4	186.037	176.465	246.52	212.939	-1.28556	-0.362396	1.46948e-05	0.000515168	205.49	-4.33321
IRF2BP2	954.345	988.086	1082.43	1121.98	-1.12804	-0.173818	1.47303e-05	0.000515168	1036.71	-4.33268
ST7	367.777	424.79	491.893	510.253	-1.25117	-0.323283	1.48138e-05	0.000516836	448.678	-4.33144
AZI2	1063.52	1013.69	937.969	894.259	1.13279	0.179884	1.6025e-05	0.000557749	977.361	4.31411
FN1	401254	393147	344655	328292	1.17451	0.232057	1.61684e-05	0.000561384	366837	4.31214
GRIK2	418.101	395.48	504.391	488.658	-1.20239	-0.265907	1.66303e-05	0.000574494	451.657	-4.30591
SH3RF3	316.534	334.362	245.951	238.7	1.24761	0.319169	1.66653e-05	0.000574494	283.887	4.30544
ST6GALNAC3	24.9184	24.654	8.43802	11.4657	1.37817	0.462751	1.65979e-05	0.000574494	17.369	4.30634
HK2	313.843	355.665	407.058	448.255	-1.24868	-0.320401	1.67855e-05	0.000577262	381.205	-4.30385
SEMA3D	1179.4	1460.39	1518.91	1849.21	-1.23285	-0.301992	1.68545e-05	0.000578259	1501.98	-4.30294
IGFBP4	18477.2	18755.6	21102.2	23459.3	-1.14544	-0.195901	1.73024e-05	0.000592219	20448.6	-4.29713
C10orf105	25.61	23.9616	55.5111	39.5058	-1.4325	-0.518533	1.80005e-05	0.000614655	36.1471	-4.28835
PPP1R12A	1509	1548.3	1337.01	1390.37	1.12714	0.172669	1.81839e-05	0.000619453	1446.17	4.2861
DACT3	130.231	113.42	173.901	147.818	-1.27677	-0.352501	1.82545e-05	0.000619737	141.343	-4.28524
ZNF618	405.042	409.91	491.39	475.447	-1.18696	-0.247276	1.8278e-05	0.000619737	445.447	-4.28495
KLF15	163.336	184.344	114.683	129.916	1.33008	0.411508	1.89939e-05	0.0006425	148.07	4.2764
DPYSL3	3199.92	3250.2	3737.04	3881.92	-1.14624	-0.196909	1.92462e-05	0.000649515	3517.27	-4.27346
THOC2	1037.78	1024.5	900.492	914.625	1.1506	0.202385	1.94858e-05	0.000656066	969.349	4.2707
PTK2B	205.263	226.12	150.45	133.306	1.29347	0.371247	1.95385e-05	0.000656311	178.785	4.2701
ENC1	153.358	147.289	222.37	239.113	-1.33042	-0.411881	2.02794e-05	0.000679619	190.532	-4.26179
SLC16A2	976.972	862.06	1158.14	1075.19	-1.17614	-0.234057	2.09939e-05	0.000701935	1018.09	-4.25405
CAB39	1189.9	1173.87	1341.94	1218.95	-1.13038	-0.17681	2.1351e-05	0.000712225	1231.16	-4.25027
ZNF589	300.924	358.043	392.291	441.799	-1.23862	-0.308732	2.17527e-05	0.000723955	373.264	-4.2461
ANTXR1	7803.81	9474.23	6685.45	8512.95	1.15664	0.209936	2.27112e-05	0.000754118	8119.11	4.23642
SMPDL3A	604.587	677.013	527.369	593.974	1.17591	0.23378	2.36296e-05	0.000782025	600.736	4.22751
WDFY1	1261.61	1315.03	1460.7	1412.92	-1.1423	-0.191944	2.366e-05	0.000782025	1362.57	-4.22722
CHST3	1237.32	1330.72	1049.48	1092.14	1.18029	0.239143	2.39397e-05	0.000789464	1177.42	4.22457
GPM6B	318.774	280.746	202.713	151.14	1.35995	0.443555	2.50841e-05	0.000825319	238.343	4.21404
XPC	1352.05	1258.14	1559.5	1394.79	-1.14954	-0.201061	2.52186e-05	0.000827857	1391.12	-4.21283
DNAJA1	1474.09	1749.02	1647.67	1879.45	-1.11713	-0.159802	2.58968e-05	0.000848194	1687.56	-4.20684
AC026703.1	106.588	131.821	42.7859	49.4192	1.3879	0.472905	2.67962e-05	0.000875666	82.6536	4.19911
PACSIN2	856.615	818.229	731.654	736.798	1.14991	0.201525	2.69174e-05	0.000877642	785.824	4.19809
PLEKHG1	216.251	224.021	277.549	246.206	-1.25077	-0.322821	2.77567e-05	0.000902967	241.007	-4.19113
ITGB4	34.6642	21.0382	15.3451	13.1401	1.40843	0.49409	2.79608e-05	0.000907563	21.0469	4.18947
SLC25A46	988.095	996.916	1131.6	1095.55	-1.13322	-0.180433	2.85324e-05	0.000924039	1053.04	-4.18487
MTURN	666.42	692.219	767.687	792.874	-1.14108	-0.190404	2.86083e-05	0.000924425	729.8	-4.18427
ALCAM	3166.62	3223.24	2715.09	2764.21	1.16131	0.215752	2.88177e-05	0.000927044	2967.29	4.18261
PTEN	1813.89	1601.72	2082.23	1868	-1.13843	-0.187048	2.87881e-05	0.000927044	1841.46	-4.18285
IGFBP7	4090.54	3789.42	3621.06	3557.69	1.14621	0.196875	3.0327e-05	0.000970371	3764.68	4.171
LRP10	7924.05	8284.39	7143.33	7840.83	1.09511	0.131075	3.03661e-05	0.000970371	7798.15	4.1707
NFASC	1815.73	1541.55	2132.81	2018.46	-1.15953	-0.21354	3.02498e-05	0.000970371	1877.14	-4.17158
APBB2	882.723	817.192	736.271	726.368	1.18077	0.239726	3.14111e-05	0.00100155	790.638	4.16299
HERC4	1366.89	1408.39	1569	1557.16	-1.13929	-0.18814	3.2322e-05	0.00102832	1475.36	-4.15646
ABLIM1	511.618	490.129	401.333	390.84	1.23287	0.302015	3.25691e-05	0.00103391	448.48	4.15472
DNAJC13	2373.87	2554.4	2644.48	2885.92	-1.10635	-0.145811	3.27681e-05	0.00103794	2614.67	-4.15332
NAGS	42.5544	39.6152	22.1235	19.9295	1.39484	0.480102	3.29775e-05	0.00104229	31.0556	4.15187
YWHAZ	7765.33	7653.62	8460.82	8134.46	-1.08851	-0.122352	3.32084e-05	0.0010473	8003.56	-4.15027
SHQ1	180.038	200.591	232.397	237.818	-1.25068	-0.322716	3.46305e-05	0.00108977	212.711	-4.14066
AMOTL1	1810.52	1833.46	2113.46	2187.16	-1.15272	-0.205041	3.47583e-05	0.00109141	1986.15	-4.13982
DFNA5	1049.14	1123.12	900.794	952.299	1.14825	0.199433	3.54422e-05	0.00111047	1006.34	4.13535
PIK3R2	1511.98	1567.22	1671.68	1764.19	-1.10526	-0.14438	3.58082e-05	0.00111951	1628.77	-4.13298
NFATC4	3451.42	3619.01	4104.02	4307.53	-1.16731	-0.223186	3.61338e-05	0.00112725	3870.5	-4.1309
ARL4C	584.958	612.087	711.439	808.264	-1.16462	-0.219858	3.69171e-05	0.0011492	679.187	-4.12597
PLCB1	518.622	519.678	620.72	614.229	-1.18016	-0.238987	3.7117e-05	0.00115294	568.312	-4.12473
CREB5	827.912	976.774	717.924	928.082	1.20708	0.271517	3.77296e-05	0.00116945	862.673	4.12096
RHOB	1766.01	1795.52	1419.96	1567.37	1.20708	0.271527	3.8016e-05	0.00117581	1637.22	4.11922
SURF4	4036.02	3992.95	3715.54	3783.15	1.06977	0.097307	3.81787e-05	0.00117832	3881.91	4.11823
GCNT4	341.425	365.521	272.891	296.775	1.23429	0.30368	3.93917e-05	0.00121316	319.153	4.11102
YPEL5	1494.21	1502.57	1682.25	1575.12	-1.12144	-0.165354	3.97772e-05	0.00122243	1563.54	-4.10877
FLOT1	2402.89	2190.01	2132.62	2101.23	1.11924	0.162518	4.01782e-05	0.00123213	2206.69	4.10645
NEK7	2502.52	2870.39	2822.22	3181.21	-1.13185	-0.178684	4.06366e-05	0.00124355	2844.09	-4.10383
CYP1B1	5302.77	6777.78	4301.73	5232.92	1.23829	0.308353	4.35643e-05	0.00132752	5403.8	4.08772
MFSD10	1053.3	980.273	846.831	930.874	1.21267	0.278188	4.35457e-05	0.00132752	952.82	4.08781
PDE1A	231.28	221.206	171.583	155.067	1.29951	0.377966	4.38786e-05	0.00133428	194.784	4.08605
ZFAND5	3131.87	3126.7	3588.94	3476.44	-1.13553	-0.18337	4.40943e-05	0.00133802	3330.99	-4.08491
TIMP3	17716.1	15053.2	21071.2	17929.1	-1.1772	-0.235365	4.52831e-05	0.00137121	17942.4	-4.07873
ZDHHC3	1903.97	1947.1	1722.5	1746.19	1.10444	0.143309	4.56885e-05	0.0013806	1829.94	4.07665
DTNA	192.525	203.97	130.344	145.426	1.32998	0.4114	4.61564e-05	0.00139182	168.066	4.07428
SCP2	1644.59	1637.13	1818.23	1748	-1.10172	-0.139753	4.63426e-05	0.00139453	1711.99	-4.07335
HECTD4	1113.23	1152.59	968.876	1099.87	1.1476	0.198615	4.71444e-05	0.00141277	1083.64	4.06935
NDFIP2	1050.63	1108.33	1238.44	1278.17	-1.18716	-0.247511	4.70797e-05	0.00141277	1168.89	-4.06967
FOXO1	159.795	195.676	117.546	132.435	1.29723	0.375434	4.81111e-05	0.00143875	151.363	4.06462
SNX30	632.273	566.209	736.659	678.625	-1.15068	-0.202482	4.8289e-05	0.00144109	653.441	-4.06376
RP11-395B7.7	616.255	662.547	535.962	577.474	1.145	0.195348	4.9921e-05	0.00148672	598.06	4.056
PKM	19443.8	16939.1	20905.1	18674.8	-1.10312	-0.141593	5.02822e-05	0.0014944	18990.7	-4.05431
PSD3	1027.17	1003.39	1236.58	1136.63	-1.18805	-0.248599	5.10248e-05	0.00151335	1100.94	-4.05088
KIAA0368	2205.71	2083.18	1984.54	1909.35	1.11224	0.153474	5.11929e-05	0.00151523	2045.7	4.05011
CLPTM1	1667.32	1751.14	1490.33	1660.89	1.10576	0.145039	5.13286e-05	0.00151614	1642.42	4.04949
MANSC1	321.968	339.46	259.119	268.663	1.21498	0.280937	5.15384e-05	0.00151923	297.302	4.04854
ETNK2	114.675	108.596	76.8613	62.5115	1.34208	0.424474	5.24468e-05	0.00154285	90.661	4.04445
VSTM4	1348.26	1394.62	1606.24	1589.14	-1.18171	-0.240873	5.28115e-05	0.00155042	1484.57	-4.04282
ACKR4	1329.21	1879.87	1873.89	2439.02	-1.3001	-0.378618	5.30316e-05	0.00155373	1880.5	-4.04185
ARL6IP5	3411.16	3532.42	3074.34	3080.79	1.10004	0.137553	5.33004e-05	0.00155844	3274.68	4.04066
AC002398.9	62.2657	53.5528	35.9875	65.7263	1.36175	0.445457	5.40882e-05	0.00157828	54.3831	4.03722
GFPT1	2048.68	1994.91	1743.72	1728.79	1.15428	0.206988	5.5289e-05	0.00161007	1879.03	4.03206
SEMA3E	28.0727	35.3735	13.7001	18.3178	1.36298	0.44676	5.59804e-05	0.00162692	23.866	4.02914
STRADB	563.515	575.974	460.242	466.712	1.19699	0.259414	5.62622e-05	0.00163183	516.611	4.02796
FMNL3	334.484	316.635	404.092	358.266	-1.19425	-0.256101	5.65757e-05	0.00163763	353.369	-4.02666
NIN	1209.42	1042.11	1070.51	950.777	1.12888	0.174896	5.73774e-05	0.00165752	1068.2	4.02334
MUC1	200.013	194.853	150.564	148.198	1.27374	0.349072	5.80468e-05	0.00167351	173.407	4.02061
LRCH1	335.243	315.649	279.805	279.93	1.19288	0.254455	6.01878e-05	0.00173178	302.657	4.01207
RAB30	390.62	409.531	474.286	485.788	-1.19047	-0.251533	6.15417e-05	0.00176721	440.056	-4.00682
LPXN	407.479	349.642	537.249	436.513	-1.25028	-0.322257	6.24956e-05	0.00178862	432.721	-4.00318
SH3BGRL3	8806.11	7584.77	9880.17	9323.36	-1.13555	-0.183387	6.25348e-05	0.00178862	8898.61	-4.00304
PRKAG2	266.212	277.207	211.329	202.251	1.22295	0.290361	6.27296e-05	0.00179065	239.25	4.0023
FTH1	47083	49621.7	50503.2	52502.4	-1.08373	-0.116003	6.29195e-05	0.00179252	49927.6	-4.00159
NYNRIN	2106.67	2106.41	2506.4	2590.68	-1.17356	-0.23089	6.44588e-05	0.00182916	2327.54	-3.99586
SLC7A14	671.775	507.564	874.676	788.992	-1.26739	-0.341865	6.43599e-05	0.00182916	710.752	-3.99623
SDCBP	3336.95	3341.89	3711.58	3768.05	-1.1112	-0.152116	6.62092e-05	0.00187515	3539.62	-3.98951
SLC6A6	819.569	797.591	966.135	923.712	-1.15376	-0.206345	6.67177e-05	0.00188585	876.752	-3.9877
GTF2I	4058.87	4119.15	4439.79	4310.32	-1.08901	-0.123011	6.68535e-05	0.001886	4232.03	-3.98721
HK1	2049.4	2071.92	2283.36	2293.15	-1.11664	-0.159158	6.80221e-05	0.00191201	2174.46	-3.9831
SOX9	94.7861	86.5638	138.021	105.495	-1.32841	-0.409696	6.80403e-05	0.00191201	106.217	-3.98304
PIP4K2A	897.104	818.759	1032.06	928.404	-1.14601	-0.196614	6.91905e-05	0.00194056	919.082	-3.97905
WWTR1	1888.26	1746.54	2122.17	1925.75	-1.1248	-0.169665	6.98153e-05	0.00195429	1920.68	-3.97691
BAIAP2	512.503	446.327	417.539	369.245	1.19606	0.258294	7.00978e-05	0.00195655	436.403	3.97595
SGMS2	1509.97	1580.28	1286.22	1323.53	1.16296	0.217807	7.01669e-05	0.00195655	1425	3.97572
KCNK15	37.7857	24.9327	19.2611	21.1765	1.38316	0.467969	7.31296e-05	0.00203523	25.789	3.96587
FABP3	4875.89	5145.19	5885.65	6509.72	-1.1912	-0.252421	7.33024e-05	0.00203612	5604.11	-3.9653
SIDT2	816.683	774.41	711.99	671.495	1.1387	0.187392	7.34456e-05	0.00203618	743.644	3.96484
PALLD	5573.77	5904.76	6198.44	6605.94	-1.10739	-0.147159	7.42135e-05	0.00205352	6070.73	-3.96236
SLC44A1	1916.26	1811.19	1711.8	1628.75	1.12347	0.167968	7.46047e-05	0.00205647	1767	3.9611
SLC9A7	206.552	206.827	257.866	258.302	-1.23714	-0.307007	7.4583e-05	0.00205647	232.387	-3.96117
OPTN	3384.68	3339.33	3679.06	3639.42	-1.08506	-0.117771	7.58272e-05	0.00208619	3510.62	-3.95722
ACVRL1	1446.56	1434.33	1175.36	1140.27	1.20741	0.271916	7.59873e-05	0.00208662	1299.13	3.95672
SLC2A1	674.652	816.678	767.942	953.19	-1.15159	-0.203631	7.64875e-05	0.00209637	803.116	-3.95515
GNPNAT1	870.996	890.313	753.81	811.714	1.14038	0.18951	7.85671e-05	0.00214929	831.708	3.94873
SLC44A2	4240.85	4608.9	3813.01	4122.56	1.09866	0.135741	7.88642e-05	0.00215334	4196.33	3.94783
SCARB1	419.561	426.63	331.341	354.935	1.20183	0.265236	8.16551e-05	0.00222533	383.117	3.93949
P4HA3	136.633	97.0478	95.5382	64.988	1.31873	0.399144	8.22659e-05	0.00223776	98.5517	3.9377
PPAPDC1B	636.92	653.87	523.743	547.268	1.18213	0.241393	8.24503e-05	0.00223856	590.45	3.93716
COPS6	1291.84	1189.07	1438.07	1232.2	-1.12319	-0.1676	8.83836e-05	0.00239079	1287.79	-3.92045
EHBP1	2544.14	2662.08	2269.98	2428.32	1.12057	0.164229	8.8461e-05	0.00239079	2476.13	3.92024
ITPR2	292.179	294.286	228.212	218.27	1.23138	0.300274	8.85539e-05	0.00239079	258.237	3.91999
SLC52A2	515.626	511.474	415.482	501.467	1.18309	0.242566	8.9454e-05	0.00241059	486.012	3.91755
LARP6	1127.95	1057.72	1326.14	1248.6	-1.17343	-0.230728	8.98004e-05	0.00241541	1190.11	-3.91662
LAYN	1886.94	1844.89	2041.64	1969.66	-1.0962	-0.132507	9.07161e-05	0.00243551	1935.78	-3.91417
CHCHD7	310.682	272.653	249.298	224.91	1.21334	0.278979	9.26783e-05	0.00248357	264.386	3.909
GLCE	425.771	419.917	507.223	497.908	-1.17257	-0.229676	9.42428e-05	0.00252082	462.705	-3.90496
SYBU	97.591	83.6741	66.2634	49.5368	1.32847	0.409764	9.4632e-05	0.00252655	74.2663	3.90396
SOX13	254.186	246.299	193.735	183.57	1.25325	0.32567	9.57073e-05	0.00255055	219.448	3.90122
ABLIM3	1982.07	1909.21	1642.2	1555.17	1.16227	0.216942	9.60332e-05	0.00255452	1772.16	3.9004
BTD	371.741	362.521	302.962	296.958	1.19805	0.260683	9.85864e-05	0.00261281	333.545	3.89404
EYA2	174.277	174.056	134.948	134.477	1.27917	0.355203	9.85816e-05	0.00261281	154.44	3.89406
BBX	1304.82	1375.97	1168.43	1233.17	1.1146	0.156528	9.94297e-05	0.00262874	1270.6	3.89198
CNN2	4042.64	3610.38	3642.01	3439.79	1.10109	0.138938	9.95516e-05	0.00262874	3683.71	3.89168
NTM	462.442	485.23	542.095	536.908	-1.18597	-0.246072	0.000100431	0.00264712	506.669	-3.88955
FLRT3	154.158	212.295	193.917	233.678	-1.24163	-0.31223	0.000100868	0.00265382	198.512	-3.88849
CACNB2	25.6114	29.5385	12.454	17.0766	1.34402	0.426557	0.000105522	0.00277119	21.1701	3.87753
ENPP2	3158.57	2661.53	3676.6	3277.8	-1.17153	-0.228398	0.000107139	0.00280855	3193.63	-3.87383
SRSF10	1035.76	1062.29	1151.03	1142.14	-1.10301	-0.141445	0.000108506	0.00283924	1097.8	-3.87074
OMG	14.0624	18.6208	29.079	31.4674	-1.31992	-0.400456	0.000108709	0.0028394	23.3074	-3.87028
CD34	105.913	138.208	154.154	154.728	-1.32729	-0.408482	0.00010948	0.0028452	138.251	-3.86856
HFE	391.003	412.872	467.493	470.041	-1.18423	-0.243953	0.000109598	0.0028452	435.352	-3.8683
IFFO1	1212.12	1276.07	1371.29	1347.89	-1.12337	-0.167828	0.000109719	0.0028452	1301.84	-3.86803
MIF	1008.33	955.824	818.423	849.916	1.21725	0.283623	0.000109658	0.0028452	908.124	3.86816
KRT33B	10.1996	14.9577	22.7065	24.1106	-1.34134	-0.423677	0.000110346	0.00285124	17.9936	-3.86664
RAB31	1448.04	1455.18	1727.01	1806.39	-1.15358	-0.206117	0.000110159	0.00285124	1609.16	-3.86705
SPHKAP	14.9314	14.3037	33.532	26.8846	-1.34214	-0.424531	0.00011541	0.00297675	22.4129	-3.85568
FSTL3	583.982	563.609	487.473	468.669	1.1892	0.249985	0.00011745	0.00302398	525.933	3.85139
FAM109A	382.861	401.789	304.312	327.602	1.22206	0.28932	0.000119573	0.00307316	354.141	3.847
GEM	401.905	392.135	283.91	262.847	1.28536	0.362168	0.000123443	0.00316698	335.199	3.83919
SPOCD1	435.09	305.111	540.721	388.327	-1.22333	-0.290813	0.000124014	0.00317599	417.312	-3.83805
LDB2	469.934	444.838	575.836	510.39	-1.20941	-0.274297	0.000127963	0.00327132	500.25	-3.83035
CASP4	663.335	677.479	565.751	566.621	1.17163	0.228512	0.000134209	0.00342494	618.297	3.8186
TACC2	308.914	314.716	380.242	371.73	-1.20044	-0.263558	0.000134656	0.00343028	343.9	-3.81778
B3GNT5	87.0118	72.9318	56.2732	46.4354	1.33888	0.421026	0.000139256	0.00354122	65.663	3.80949
C1orf198	1928	2125.45	2253.39	2525	-1.15639	-0.209623	0.000140215	0.00355935	2207.96	-3.80779
SLC1A1	370.542	344.174	312.454	278.921	1.18387	0.243511	0.000141527	0.00358635	326.523	3.80548
NBL1	5449.14	5136.5	4352.41	4369.56	1.21777	0.284239	0.000144851	0.00365637	4826.9	3.79974
PRSS12	3532.2	3915.29	3131.06	3235.29	1.13914	0.187949	0.00014506	0.00365637	3453.46	3.79938
TSC22D1	1300.76	1301.62	1458.17	1481.07	-1.11588	-0.15818	0.000145303	0.00365637	1385.41	-3.79896
ZSCAN30	381.323	379.745	454.284	407.063	-1.17606	-0.233957	0.000144579	0.00365637	405.604	-3.8002
HIP1R	782.022	745.427	672.782	628.906	1.15878	0.212602	0.000147876	0.00371465	707.284	3.79461
AF131217.1	130.592	137.842	96.0611	98.5771	1.29309	0.370825	0.000148464	0.00372293	115.768	3.79363
NR2F1-AS1	295.297	304.523	227.967	207.387	1.2502	0.322164	0.00014912	0.00373291	258.793	3.79253
TNFAIP8L3	50.2125	55.4545	29.2804	33.0472	1.34802	0.430847	0.000149475	0.00373532	41.9987	3.79194
CYB5R3	12698	12788.1	11419	12028.8	1.10156	0.139552	0.000149973	0.00374129	12233.5	3.79111
GPR126	106.384	107.013	45.7417	52.0254	1.37589	0.460367	0.000153917	0.00382645	77.7908	3.78466
ZNF521	758.499	720.521	865.009	828.124	-1.15681	-0.210146	0.000153904	0.00382645	793.039	-3.78468
RASA2	600.751	620.866	696.875	684.334	-1.14691	-0.197747	0.00015451	0.00383461	650.706	-3.78371
PTPRK	1513.4	1439.29	1675.86	1627.42	-1.10966	-0.15012	0.000159442	0.00395021	1563.99	-3.77588
ESM1	22.7052	22.0616	41.5681	32.6903	-1.35171	-0.434782	0.000164936	0.00407935	29.7563	-3.76743
ACPP	11.7264	10.3364	32.2563	32.9973	-1.30835	-0.387747	0.000167471	0.00412791	21.8291	-3.76362
SERPINB2	783.955	1022.42	1046.83	1363.59	-1.27743	-0.353241	0.000167444	0.00412791	1054.2	-3.76366
ALDH1L2	3551.44	3187.64	3009.06	2629.44	1.17575	0.233586	0.000169476	0.00417021	3094.39	3.76064
PTPRQ	55.3604	82.1433	28.1959	42.8952	1.33546	0.417332	0.000172056	0.00422648	52.1487	3.75686
BLVRA	328.081	292.842	394.069	312.609	-1.18024	-0.239081	0.000179224	0.00439509	331.9	-3.74663
TMEM123	2217.74	2479.03	2426.18	2664.91	-1.0876	-0.121151	0.000179928	0.00440488	2446.97	-3.74565
TTL	1079.71	1146.18	1189.92	1262.96	-1.09957	-0.136941	0.000180392	0.00440878	1169.69	-3.745
ACVR2A	348.299	383.128	281.874	358.433	1.22975	0.29837	0.000181889	0.00443784	342.934	3.74293
RGS4	50.9845	42.2743	83.5211	70.3751	-1.36727	-0.451297	0.000182755	0.00445146	61.7887	-3.74173
LDOC1L	828.693	816.988	924.921	877.199	-1.11734	-0.160066	0.000183694	0.00446679	861.95	-3.74045
ARHGAP42	46.0189	61.2078	71.3641	77.2704	-1.3201	-0.400651	0.00018585	0.00451162	63.9653	-3.73751
C15orf61	128.587	137.466	95.7554	98.0282	1.26973	0.344519	0.000188645	0.00457178	114.959	3.73376
AKR1C2	439.989	532.076	540.702	659.878	-1.1903	-0.251321	0.000189468	0.00457638	543.161	-3.73266
LACC1	617.761	665.328	811.275	938.643	-1.25779	-0.33089	0.000189347	0.00457638	758.252	-3.73282
TMEM35	143.484	111.667	210.881	171.499	-1.31784	-0.398176	0.000191988	0.0046295	159.383	-3.72933
EXT1	3839.62	3641.67	4234.04	4124.01	-1.1078	-0.147693	0.000192721	0.00463943	3959.83	-3.72837
SCARA5	284.183	316.965	240.42	197.902	1.25753	0.330589	0.000194533	0.00467526	259.867	3.72601
SATB2	101.361	111.42	136.647	125.806	-1.27327	-0.348534	0.000197763	0.00474229	118.808	-3.72186
VGLL4	728.76	761.428	861.259	864.895	-1.16077	-0.215086	0.000197979	0.00474229	804.085	-3.72158
RCOR3	636.291	616.938	560.564	578.173	1.13542	0.183226	0.000200179	0.00478707	597.991	3.71879
HMGB3	194.292	185.897	238.863	203.481	-1.21626	-0.282452	0.000201085	0.00480077	205.633	-3.71765
BDKRB1	44.1483	35.5886	72.0482	53.8956	-1.34943	-0.432352	0.000205334	0.00489413	51.4202	-3.71236
SELENBP1	558.192	463.202	681.619	584.465	-1.17653	-0.234542	0.000205674	0.00489416	571.869	-3.71194
PRKG1	986.514	953.813	865.744	865.516	1.14007	0.189127	0.000206016	0.00489424	917.897	3.71152
PCDHGC3	2374.7	2583.66	2743.99	2997.15	-1.15498	-0.207864	0.000215747	0.00511698	2674.88	-3.69983
VWF	61.4077	51.2197	93.8512	88.7181	-1.32049	-0.401074	0.00021655	0.00512761	73.7992	-3.69888
HSPA5	7078.86	7523.28	6307.5	6859.93	1.10264	0.140962	0.000217479	0.00514118	6942.39	3.6978
NUP133	569.821	604.708	652.696	619.925	-1.13191	-0.178765	0.000222408	0.00524912	611.788	-3.6921
VASN	5073.02	4708.81	4226.37	4215.65	1.17721	0.235376	0.000226572	0.00533867	4555.96	3.68738
LAMB2	14149.6	14421.7	12915.6	13429.1	1.10545	0.144628	0.000228757	0.00538137	13729	3.68494
TPBG	1703.08	1723.86	1928.72	2111.06	-1.12821	-0.174039	0.00023115	0.00542884	1866.68	-3.68229
TRIM8	1931.96	2014.04	2135.98	2294.02	-1.10949	-0.149891	0.000231631	0.0054313	2094	-3.68176
AR	978.325	895.793	849.606	834.23	1.14374	0.193761	0.000233211	0.00545949	889.488	3.68002
SCFD2	364.691	362.019	430.769	410.866	-1.18146	-0.240569	0.00023556	0.00550555	392.086	-3.67747
SYT7	87.6713	79.7361	130.365	115.309	-1.31687	-0.397108	0.000236284	0.00551355	103.27	-3.67669
ZHX2	612.917	650.908	722.668	746.451	-1.14713	-0.19803	0.000238247	0.00555039	683.236	-3.67457
RP11-312O7.2	91.4592	72.469	53.9574	80.615	1.33331	0.415013	0.000240447	0.0055846	74.6252	3.67223
TP53INP2	693.937	642.515	791.478	766.199	-1.14658	-0.197334	0.000240489	0.0055846	723.532	-3.67218
FUT8	611.84	629.382	716.726	737.073	-1.15285	-0.205205	0.000245105	0.00568105	673.755	-3.66732
PTDSS1	1302.33	1351.1	1536.81	1687.52	-1.15055	-0.202323	0.000245429	0.00568105	1469.44	-3.66698
MMP27	15.2773	18.7552	30.4328	35.0388	-1.30209	-0.38083	0.000245991	0.00568494	24.8761	-3.6664
CTSB	31111	30005.2	28213.5	27743.6	1.08824	0.122001	0.000257989	0.0059527	29268.3	3.6542
RPN1	2734.08	2808.12	2450.13	2580.92	1.098	0.134875	0.000262362	0.00603434	2643.31	3.64988
ZFPM2	275.397	305.952	328.481	344.735	-1.18475	-0.244578	0.000261947	0.00603434	313.641	-3.65029
ANK1	327.902	279.807	413.905	390.878	-1.21747	-0.283889	0.000265603	0.00609915	353.123	-3.64673
C11orf96	36.0248	46.477	63.579	70.3859	-1.33472	-0.416537	0.000268004	0.00613478	54.1167	-3.64441
PPIC	963.49	967.843	849.163	798.036	1.16607	0.221649	0.000267654	0.00613478	894.633	3.64475
DSTYK	1061.86	998.853	1209.53	1148.71	-1.12613	-0.171371	0.000269654	0.00615437	1104.74	-3.64283
KIAA0196	1271.02	1298.02	1397.89	1379.2	-1.094	-0.129616	0.000269712	0.00615437	1336.53	-3.64278
PNRC2	768.487	931.295	882.447	984.96	-1.13775	-0.18618	0.0002771	0.00631298	891.797	-3.63582
HSPH1	883.83	1050.62	978.822	1133.25	-1.11067	-0.151427	0.000277758	0.006318	1011.63	-3.63521
ADAM19	537.975	372.568	467.838	357.917	1.15474	0.207562	0.000279625	0.00634051	434.075	3.63348
SEZ6L2	494.761	412.415	409.953	391.345	1.16197	0.216574	0.000279334	0.00634051	427.118	3.63375
FAM110B	126.526	132.953	164.132	168.618	-1.23229	-0.301343	0.000283037	0.00640781	148.057	-3.63035
PLCB3	796.741	880.587	921.076	995.533	-1.13917	-0.187989	0.000284578	0.00642258	898.484	-3.62895
SESN3	683.404	661.986	839.782	828.556	-1.21869	-0.285336	0.000284184	0.00642258	753.432	-3.62931
ZNF281	802.545	719.09	974.003	880.054	-1.19073	-0.251846	0.000285168	0.00642585	843.923	-3.62841
DNAJB5	183.891	194.799	237.842	251.794	-1.23593	-0.305596	0.000287949	0.0064784	217.082	-3.62591
NLGN1	384.523	399.816	472.705	499.36	-1.1945	-0.256412	0.000289498	0.00650313	439.101	-3.62452
ANKMY2	469.207	431.98	545.972	476.937	-1.14427	-0.194432	0.00029867	0.00669796	481.024	-3.61645
DPP4	5012.51	5401.08	5978.8	7011.97	-1.16714	-0.222972	0.000299099	0.00669796	5851.09	-3.61608
MORF4L2	3328.63	3276.15	3014.91	2914.37	1.09574	0.131904	0.000304464	0.00680756	3133.52	3.61147
BZW1	3577.91	3486.25	3923.45	3757.77	-1.10019	-0.137758	0.000305206	0.0068136	3686.34	-3.61084
NUAK1	440.704	464.081	365.721	418.055	1.17936	0.238006	0.000306024	0.00682132	422.14	3.61015
TMEM229B	26.3579	37.1034	45.4129	53.9919	-1.32235	-0.403107	0.000309637	0.00689121	40.7165	-3.6071
CLUAP1	341.149	382.733	410.957	379.391	-1.17846	-0.236909	0.000311928	0.00693151	378.557	-3.60519
PLEKHG3	73.8549	85.5099	106.076	110.204	-1.28555	-0.362385	0.000315104	0.00699135	93.9111	-3.60256
SLC15A4	409.64	425.829	351.136	401.096	1.15779	0.211368	0.000316934	0.00702115	396.925	3.60105
CACNA2D1	786.151	826.069	702.294	749.067	1.12142	0.165333	0.000323352	0.00715237	765.895	3.59584
ASH2L	665.294	650.614	581.51	574.531	1.13626	0.184295	0.000324339	0.00716323	617.987	3.59504
TMOD1	31.5679	39.182	53.2833	66.1492	-1.32836	-0.409642	0.000330135	0.00728011	47.5456	-3.59043
EIF4G2	13451.7	13816.5	14343.4	15064.7	-1.07116	-0.0991788	0.000331228	0.00728198	14169.1	-3.58957
SPATA13	609.223	658.78	731.21	739.678	-1.18348	-0.24304	0.000331113	0.00728198	684.723	-3.58966
PI4K2B	365.226	347.527	437.244	385.8	-1.18109	-0.240125	0.000335836	0.00737206	383.949	-3.58596
INTS8	809.991	817.986	725.212	693.778	1.12708	0.172584	0.000341138	0.00747709	761.742	3.58187
FOSL2	1747.89	1762.57	1557.89	1574.03	1.12726	0.172817	0.000345199	0.00754321	1660.59	3.57878
THSD4	1312.53	1384.96	1129.3	1205.23	1.15281	0.205156	0.000344688	0.00754321	1258.01	3.57917
SPON2	1597.72	1564.16	1232.84	1258.49	1.21713	0.283489	0.000348005	0.00759304	1413.3	3.57667
DOK1	377.723	350.209	315.416	322.907	1.16366	0.218667	0.000349658	0.00761759	341.564	3.57543
INPP5F	434.988	416.925	362.54	369.22	1.17681	0.234884	0.000354008	0.00770074	395.918	3.57219
IGSF8	442.744	490.51	366.609	422.936	1.17895	0.237507	0.000359426	0.00780684	430.7	3.56821
ETS1	696.336	648.42	819.163	693.214	-1.16384	-0.218893	0.000363557	0.00788472	714.283	-3.56522
UQCRB	1494.21	1529.93	1695.54	1638.93	-1.11854	-0.161621	0.000368793	0.00798628	1589.65	-3.56146
HIPK2	724.326	827.122	628.821	769.537	1.14214	0.191734	0.000370533	0.00801194	737.451	3.56023
ADAMTS7	593.307	681.19	504.699	581.284	1.19191	0.253278	0.00037187	0.00802883	590.12	3.55928
MGAT5	1158.34	1219.67	1277.05	1357.69	-1.11814	-0.161104	0.000373338	0.00804849	1253.19	-3.55825
GPX1	2613.85	2189.77	2827.39	2439.75	-1.10172	-0.13976	0.000376032	0.00809449	2517.69	-3.55636
AKAP13	1382.48	1292.1	1252.06	1226.26	1.10915	0.149451	0.000379555	0.00815817	1288.22	3.55391
PERP	2872.36	3047.58	3195.11	3408.68	-1.11165	-0.152704	0.000382039	0.00819936	3130.93	-3.55219
FBXL7	754.34	782.495	856.299	891.16	-1.12952	-0.175712	0.000383093	0.00820397	821.074	-3.55146
LY6K	161.11	114.608	209.931	161.743	-1.23833	-0.308396	0.000383389	0.00820397	161.848	-3.55126
TBX5-AS1	723.549	767.453	816.148	805.657	-1.12783	-0.173555	0.000384563	0.00821691	778.202	-3.55046
FRS2	598.644	621.489	684.162	696.336	-1.13157	-0.178325	0.000386838	0.0082533	650.158	-3.5489
KIAA1671	157.765	175.458	205.525	236.658	-1.23728	-0.307168	0.000389335	0.00829432	193.851	-3.54721
BCL7A	130.355	132.656	90.375	87.9718	1.28825	0.365412	0.000393942	0.00836676	110.339	3.54411
BPI	25.6941	20.0393	12.2119	7.62467	1.30143	0.380093	0.000393739	0.00836676	16.3925	3.54424
CORO1C	4267.69	4563.25	4579.48	4929.93	-1.08431	-0.116773	0.000394472	0.00836676	4585.09	-3.54375
SNCAIP	168.822	141.21	117.587	106.174	1.28973	0.367066	0.000399303	0.0084568	133.448	3.54054
HNMT	191.836	242.292	155.77	194.096	1.22423	0.291873	0.000409553	0.00866117	195.999	3.53385
OLFML2B	399.528	427.567	306.692	300.912	1.24195	0.312613	0.000410278	0.00866383	358.675	3.53338
MATN2	1288.34	999.078	1039.65	758.35	1.18592	0.246007	0.000410932	0.00866496	1021.35	3.53296
MCU	693.599	636.312	808.027	698.671	-1.14599	-0.196592	0.000412579	0.00867437	709.152	-3.5319
SMEK1	677.455	738.343	755.61	747.523	-1.11304	-0.1545	0.000412115	0.00867437	729.733	-3.5322
MICAL3	533.084	600.716	613.936	642.77	-1.13928	-0.188122	0.000418582	0.00878778	597.626	-3.52808
SFRP1	4225.11	4271.7	3675.86	3294.11	1.12339	0.167862	0.000420106	0.00880698	3866.7	3.52712
SEPT9	7263.26	6588.95	8082.45	7602.96	-1.11403	-0.155793	0.000420923	0.00881132	7384.41	-3.52661
RGS3	406.136	422.011	474.39	503.562	-1.17349	-0.2308	0.000426439	0.00891387	451.525	-3.52316
ARRDC1	369.017	364.852	278.203	288.963	1.23617	0.305873	0.000428288	0.00893959	325.259	3.52201
CD9	1283.13	1185.61	1489.85	1331.2	-1.15585	-0.208956	0.000429784	0.00895787	1322.45	-3.52109
MRPS16	688.763	687.744	783.468	704.65	-1.13242	-0.179408	0.000433851	0.00902959	716.156	-3.51859
SSTR1	1007.09	1212.71	833.301	1022.65	1.17456	0.232126	0.000435888	0.00905894	1018.94	3.51734
MARCKSL1	278.109	276.759	219.153	237.871	1.23021	0.298905	0.000438407	0.00909821	252.973	3.51581
ASPA	144.014	156.453	98.8016	106.257	1.28477	0.361507	0.000446513	0.00922667	126.381	3.51095
CES4A	244.574	219.294	302.25	240.823	-1.20075	-0.263935	0.000445646	0.00922667	251.735	-3.51146
PLK2	504.564	426.157	608.893	474.725	-1.18964	-0.250528	0.000446485	0.00922667	503.584	-3.51096
LOXL1	2782.75	2650.87	3386.37	3455.28	-1.1831	-0.242568	0.000447865	0.00924137	3068.82	-3.51014
SGK1	952.046	931.396	787.429	737.464	1.18277	0.242172	0.000453255	0.00933925	852.084	3.50696
TNIK	69.6716	60.7598	100.558	84.6671	-1.27625	-0.351909	0.000456045	0.00938335	78.914	-3.50533
TMEM119	3720.91	3654.45	4551.91	4385.71	-1.20786	-0.272454	0.000459537	0.00944176	4078.24	-3.5033
ALDH9A1	1714.03	1509.34	1913.51	1688.69	-1.10595	-0.14529	0.00046365	0.00951272	1706.39	-3.50092
CARHSP1	854.843	754.451	1023.84	911.546	-1.17968	-0.238402	0.000470418	0.0096379	886.17	-3.49706
RNF157	144.335	130.305	104.779	106.078	1.27913	0.355161	0.000472818	0.00967336	121.374	3.4957
RASA1	835.79	890.218	938.28	935.949	-1.11609	-0.158451	0.000478023	0.009766	900.059	-3.49278
ADAM15	1390.77	1621.39	1196.8	1384.99	1.13917	0.187981	0.00048108	0.00978694	1398.49	3.49108
ANPEP	15936.6	12706.8	13928	10899.7	1.12599	0.171191	0.000480466	0.00978694	13367.8	3.49142
C1RL	751.475	666.367	647.024	570.643	1.16662	0.22233	0.00047976	0.00978694	658.877	3.49181
CDCP1	74.4762	58.1672	130.694	102.555	-1.33329	-0.414987	0.000482476	0.00980151	91.4733	-3.4903
RP11-253M7.1	52.7067	46.4268	76.296	80.8594	-1.2907	-0.368149	0.000485	0.00983896	64.0722	-3.48891
FAM101B	605.789	620.144	506.594	509.346	1.19016	0.251161	0.00049366	0.0100006	560.468	3.48417
B3GALT2	40.0083	53.0479	20.1367	15.7493	1.29737	0.375586	0.000495186	0.0100175	32.2356	3.48335
LMF2	1641.91	1587.93	1377.95	1445.8	1.16069	0.214977	0.000496342	0.0100268	1513.4	3.48272
MEIS1	1142.83	1106.64	1285.79	1256.7	-1.10577	-0.145047	0.000498125	0.0100488	1197.99	-3.48176
GSTM5	583.273	553.646	505.145	496.131	1.1571	0.210508	0.000500505	0.0100827	534.548	3.48049
DYRK2	485.13	447.319	563.332	500.759	-1.14443	-0.194626	0.000503733	0.0101336	499.135	-3.47876
TSPYL2	614.96	559.68	703.209	577.38	-1.15382	-0.206423	0.000509558	0.0102223	613.807	-3.47568
WWC3	910.746	994.036	1036.34	1133.27	-1.12024	-0.163812	0.000508945	0.0102223	1018.6	-3.476
NEMF	641.415	714.781	716.338	768.706	-1.11364	-0.155289	0.000515576	0.0103287	710.31	-3.47253
EXOC6	71.2628	84.0239	99.8739	105.654	-1.26939	-0.344134	0.000530297	0.0106089	90.2037	-3.46497
SLC20A1	1148.41	1135.94	1331.65	1359.31	-1.15502	-0.20792	0.000534231	0.0106728	1243.83	-3.46298
ADH1B	844.741	1511.38	749.76	1325.32	1.24062	0.311061	0.000535805	0.0106894	1107.8	3.46219
CUL4B	1454.15	1374.06	1619.05	1512.72	-1.10543	-0.14461	0.000537443	0.0107073	1489.99	-3.46137
NT5E	6518.54	6106.01	5767.83	5261.91	1.12073	0.164443	0.000549695	0.0109364	5913.57	3.45529
PNPLA2	1591.45	1608.3	1392.29	1516.89	1.12924	0.175347	0.000551029	0.0109478	1527.23	3.45464
CST3	3645.85	3902.75	3266.64	3556.43	1.11222	0.153444	0.000552376	0.0109595	3592.92	3.45398
PPAP2A	919.904	831.413	811.589	763.886	1.15318	0.205617	0.000555185	0.0110001	831.698	3.45261
PPT2-EGFL8	8.54352	17.365	33.1217	15.9564	-1.23228	-0.301325	0.000564694	0.0111732	18.7466	-3.44803
TMEM159	478.504	534.445	562.013	552.072	-1.15555	-0.208574	0.000567193	0.0112073	531.758	-3.44684
NAPEPLD	178.04	206.235	143.244	168.67	1.2182	0.284755	0.000570883	0.0112648	174.047	3.44508
GLS	2092.1	2423.41	2390.84	2660.36	-1.12982	-0.176092	0.000574182	0.0113089	2391.68	-3.44353
PIK3IP1	456.927	432.375	566.602	521.055	-1.19997	-0.262995	0.000574684	0.0113089	494.24	-3.44329
LINC00341	374.242	313.842	449.02	402.356	-1.16746	-0.223369	0.000579677	0.0113916	384.865	-3.44095
STK32B	489.056	507.213	579.311	678.543	-1.17902	-0.237585	0.000582995	0.0114413	563.531	-3.4394
EBF1	775.631	763.361	661.787	652.421	1.17486	0.232491	0.000586477	0.011483	713.3	3.43779
PINK1	1345.51	1294.22	1476.65	1470.87	-1.10397	-0.142699	0.000586709	0.011483	1396.81	-3.43769
FBLIM1	1239.35	1076.07	1101.37	1026.81	1.11772	0.160563	0.000591292	0.011557	1110.9	3.43558
EPHB2	51.9935	53.5726	82.4723	66.7049	-1.31622	-0.396396	0.000593549	0.0115759	63.6858	-3.43455
PLEKHM1	859.937	837.399	967.685	936.075	-1.12033	-0.163924	0.000593861	0.0115759	900.274	-3.4344
ARHGEF6	483.142	473.741	425.552	432.115	1.1457	0.196233	0.000595983	0.0116016	453.638	3.43344
SLIT2	2214.12	2084.81	2591.58	2531.11	-1.15331	-0.205785	0.000601876	0.0117005	2355.41	-3.43077
CIT	1033.53	847.316	1451.4	1130.57	-1.27313	-0.348378	0.000604317	0.0117322	1115.71	-3.42967
NQO1	6948.77	7667.81	5763.67	5971.75	1.15613	0.2093	0.000617793	0.0119617	6588	3.42368
RTFDC1	1183.18	1105.15	1293.89	1189.16	-1.09281	-0.128039	0.000617209	0.0119617	1192.85	-3.42394
CDK14	414.869	441.768	484.91	508.09	-1.14542	-0.195877	0.000619792	0.0119843	462.409	-3.4228
FOXP4	336.869	326.284	263.988	275.804	1.2138	0.27953	0.000621206	0.0119956	300.736	3.42218
MOK	160.791	168.026	199.743	183.813	-1.20904	-0.273861	0.000622573	0.0120059	178.093	-3.42158
SNX9	4036.57	4073.29	4463.76	4479.91	-1.10158	-0.139571	0.000631445	0.0121608	4263.38	-3.41774
CHD4	2821.18	2746	3086.78	3020.72	-1.08213	-0.113877	0.000635878	0.0122299	2918.67	-3.41583
EFR3A	1443.43	1586.33	1584.23	1749.39	-1.08661	-0.119839	0.000637251	0.01224	1590.85	-3.41524
SMPD1	2528.42	2544.44	2291.06	2309.11	1.084	0.116364	0.000639914	0.0122748	2418.26	3.41411
ANKRD28	2204.82	1939.98	1981.46	1738.33	1.11188	0.153005	0.000645431	0.0123642	1966.15	3.41177
NBR1	2653.11	2490.17	2861.53	2653.91	-1.08294	-0.114957	0.000666866	0.0127579	2664.68	-3.40285
TMEM214	1720.36	1656.4	1567.95	1592.79	1.09174	0.126624	0.000668171	0.012766	1634.37	3.40232
ARF6	1034.54	1035.89	1161.66	1217.36	-1.11858	-0.161663	0.000680042	0.0129756	1112.36	-3.3975
AACS	942.712	812.431	814.463	690.606	1.13869	0.18738	0.000682223	0.013	815.053	3.39663
GNG12	5194.21	5189.53	5570.66	5653.33	-1.0693	-0.0966703	0.000683277	0.013003	5401.93	-3.3962
HSPA4	1852.43	2011.9	1997.65	2097.41	-1.08153	-0.11307	0.000685857	0.0130349	1989.85	-3.39517
STMN2	158.787	107.167	195.824	129.298	-1.21453	-0.2804	0.000688842	0.0130744	147.769	-3.39398
ACTA2	1945.08	2489.24	1417.92	1740.81	1.25698	0.329964	0.000697988	0.0132306	1898.26	3.39037
ANXA2P2	303.504	256.02	255.328	229.631	1.17031	0.226888	0.000706066	0.013364	261.121	3.38721
TGFBR3	4130.42	4771.33	4722.76	5367.59	-1.12473	-0.169583	0.000706877	0.013364	4748.02	-3.3869
TSC22D4	812.054	749.927	699.689	729.023	1.14183	0.191347	0.000708549	0.0133781	747.673	3.38625
H6PD	2372.27	2478.2	2166.46	2283.42	1.09925	0.136519	0.000711047	0.0133952	2325.09	3.38528
LAPTM4B	816.445	860.277	714.183	788.121	1.13152	0.178259	0.000711308	0.0133952	794.756	3.38518
HSD17B4	1226.29	1269.23	1103.41	1158.97	1.10924	0.149566	0.000715226	0.0134515	1189.48	3.38367
AHNAK2	8696.67	8372.25	7860.02	8338.27	1.09312	0.128451	0.000736281	0.0138115	8316.8	3.3757
DENND2A	577.679	517.619	670.417	575.125	-1.16007	-0.214217	0.000736265	0.0138115	585.21	-3.37571
FAM214A	381.768	357.683	451.703	405.928	-1.16215	-0.216796	0.00074206	0.0138838	399.271	-3.37355
TMEM130	92.9367	61.1851	138.362	97.8963	-1.30148	-0.380148	0.000741674	0.0138838	97.5951	-3.37369
KDELR3	1500.7	1319.18	1340.14	1191.66	1.10639	0.145864	0.000754307	0.0140947	1337.92	3.36904
TRIM29	54.9353	47.9187	35.5614	30.5187	1.31	0.389562	0.000757181	0.0141301	42.2335	3.36799
CASC10	336.243	394.132	280.216	274.542	1.17261	0.229729	0.000765875	0.0142683	321.283	3.36484
PPP1R14C	30.7521	32.78	52.8016	51.0508	-1.30611	-0.385278	0.00076656	0.0142683	41.8461	-3.3646
RAB27B	139.646	152.347	196.958	202.423	-1.26702	-0.341437	0.000767579	0.0142689	172.843	-3.36423
AKR1C1	1324.18	1701.49	1577.24	2112.7	-1.17056	-0.2272	0.000789823	0.0145327	1678.9	-3.35634
BATF2	20.8875	18.1458	35.5734	25.3451	-1.3164	-0.396602	0.000789464	0.0145327	24.988	-3.35646
GAP43	6.7725	7.35929	19.6787	12.8414	-1.28403	-0.360676	0.000788658	0.0145327	11.663	-3.35675
OGDH	1942.61	1861.92	2078.52	2045.73	-1.08793	-0.121587	0.000784355	0.0145327	1982.19	-3.35826
RALGPS1	77.0245	74.3528	52.8423	71.4739	1.28723	0.364269	0.000784724	0.0145327	68.9234	3.35813
RP11-644F5.10	158.243	186.792	206.855	215.112	-1.24456	-0.315633	0.000788966	0.0145327	191.751	-3.35664
TMEM183A	672.374	691.408	758.446	723.134	-1.11948	-0.162825	0.000789473	0.0145327	711.34	-3.35646
TRIM56	404.414	463.724	331.453	390.517	1.19004	0.251012	0.000788058	0.0145327	397.527	3.35696
SCARA3	1133.73	906.385	1352.04	1078.4	-1.18224	-0.241526	0.000795301	0.0146149	1117.64	-3.35443
FAT4	1208.57	1240.82	1045.1	1103.37	1.16843	0.224568	0.000804319	0.0147619	1149.47	3.3513
TPST1	915.617	869.636	827.823	816.822	1.11098	0.151836	0.0008108	0.0148619	857.475	3.34908
VAT1L	32.5565	23.9422	53.3825	46.7797	-1.29471	-0.372632	0.000820906	0.0150281	39.1652	-3.34565
AC007743.1	17.6152	12.683	6.0324	7.94212	1.30141	0.380074	0.000831909	0.0152102	11.0682	3.34195
DPYSL2	4087.91	3830.82	3752.99	3748.72	1.09119	0.125902	0.000833319	0.0152168	3855.11	3.34148
MSANTD3-TMEFF1	100.752	33.7068	37.7037	0	1.00463	0.0066645	0.000842789	0.0153703	43.0406	3.33835
SOCS1	30.907	37.2302	47.9925	35.226	-1.30111	-0.379741	0.000844317	0.0153787	37.8389	-3.33784
EMP1	3782.35	3306.23	4050.57	3651.95	-1.08828	-0.122056	0.000860588	0.0156553	3697.78	-3.33253
IGFBP5	21294.5	29825.7	26777.5	38782.6	-1.22762	-0.295861	0.000864648	0.0157094	29170.1	-3.33122
GPR161	303.941	294.341	253.863	239.662	1.18371	0.243319	0.000887565	0.0161055	272.952	3.32394
RASD1	140.206	144.512	101.983	107.169	1.28172	0.358081	0.00089051	0.0161387	123.467	3.32301
WNT2B	516.644	385.52	449.745	334.286	1.14199	0.191549	0.000898762	0.0162678	421.548	3.32044
FNDC3B	3244.48	3353.01	2964.73	3139.37	1.09873	0.135833	0.000907138	0.0163784	3175.4	3.31785
HSPA8	10434.5	11912.9	11536.2	13112.9	-1.10393	-0.142649	0.000906787	0.0163784	11749.1	-3.31796
H2AFY	1069.53	1032.34	1176.42	1100.7	-1.09798	-0.134849	0.000911348	0.0164315	1094.75	-3.31655
NARS2	150.282	156.245	188.577	202.501	-1.20939	-0.274277	0.000912355	0.0164315	174.401	-3.31625
CTTN	5876.06	5913.81	6222.26	6232.98	-1.05875	-0.0823648	0.000913614	0.0164337	6061.28	-3.31586
NTF3	108.248	106.916	150.704	140.03	-1.26437	-0.338419	0.000917228	0.0164782	126.475	-3.31476
HSP90AA1	7601.59	8876.76	8354.38	9633.76	-1.09879	-0.135914	0.00092184	0.0165404	8616.62	-3.31335
MYOC	12.4676	16.1279	24.3114	21.8398	-1.27477	-0.35024	0.000924959	0.0165758	18.6867	-3.31241
KBTBD11	35.8026	29.2339	20.3261	18.749	1.28871	0.365933	0.000936299	0.0167582	26.0279	3.309
IFIT2	266.552	311.564	407.409	327.834	-1.29615	-0.374234	0.000940832	0.0167977	328.34	-3.30765
TRABD	370.431	356.578	307.381	377.236	1.1761	0.234007	0.000939937	0.0167977	352.907	3.30791
EVA1A	212.164	175.317	260.392	239.021	-1.21074	-0.275887	0.000943673	0.0168135	221.724	-3.3068
PLCL1	58.4886	79.6617	39.6294	36.6532	1.28485	0.361604	0.00094404	0.0168135	53.6082	3.30669
COL27A1	554.272	529.715	640.922	619.218	-1.1411	-0.190429	0.000950555	0.0168735	586.032	-3.30477
LRP1	33510.6	33006.5	30492.6	32526.9	1.10081	0.138571	0.000948877	0.0168735	32384.2	3.30526
MT1E	162.135	114.325	123.562	77.6755	1.22843	0.296816	0.000950915	0.0168735	119.424	3.30466
FAM102A	967.357	887.126	1101.89	1066.2	-1.13014	-0.176505	0.000958461	0.0169865	1005.64	-3.30244
IMPDH1	760.293	668.93	644.636	601.596	1.15295	0.205326	0.000961378	0.0170173	668.864	3.30159
EXOC6B	695.013	739.917	802.212	861.542	-1.14202	-0.191591	0.000967263	0.0170796	774.671	-3.29988
FOXN3	1498.19	1683.57	1360.91	1518.35	1.1078	0.147703	0.000966929	0.0170796	1515.25	3.29998
ARHGAP22	395.794	407.074	502.748	495.271	-1.19489	-0.256878	0.000969969	0.0171065	450.222	-3.2991
DERL1	1073.6	1154.42	971.204	1056.44	1.10097	0.138781	0.000973103	0.0171408	1063.92	3.29819
HSDL2	620.809	672.562	702.8	727.119	-1.13015	-0.176515	0.00097781	0.0171819	680.822	-3.29683
PLEC	20068.4	18488.3	17598.6	17129.5	1.13182	0.178649	0.00097726	0.0171819	18321.2	3.29699
CUL7	1157.75	957.767	1052.36	860.432	1.09484	0.130717	0.00097968	0.0171938	1007.08	3.2963
CCT2	1097.24	1155.33	1193.94	1192.61	-1.09327	-0.128656	0.000988168	0.0173217	1159.78	-3.29387
SYNPO	900.367	818.418	1025.97	908.935	-1.14473	-0.195001	0.000993749	0.0173984	913.423	-3.29229
SLC16A7	225.952	230.58	273.327	283.65	-1.17501	-0.232677	0.000995874	0.0174145	253.378	-3.29169
LSM3	231.117	258.542	275.673	261.66	-1.17645	-0.234443	0.000999908	0.0174639	256.748	-3.29055
ASCC3	2065.52	2168.12	2211.25	2334.95	-1.08095	-0.112306	0.00100744	0.0175743	2194.96	-3.28844
DAB2IP	1266.84	1253.07	1423	1469.5	-1.11734	-0.160064	0.00101538	0.0176914	1353.1	-3.28623
C3	75.0907	80.6413	107.304	125.494	-1.26351	-0.337436	0.00102042	0.0177577	97.1325	-3.28484
BIVM	567.186	602.857	661.733	628.123	-1.15084	-0.202689	0.00103392	0.017971	614.974	-3.28113
COL13A1	199.276	172.982	241.173	219.938	-1.19716	-0.259616	0.00103662	0.0179962	208.342	-3.2804
KIAA1958	49.9557	47.6103	72.8122	64.7274	-1.27906	-0.355083	0.00105947	0.018371	58.7764	-3.27424
TXNDC16	170.859	167.085	136.417	151.234	1.22351	0.291027	0.00106854	0.018506	156.399	3.27183
ETHE1	417.115	415.723	499.529	483.361	-1.1598	-0.213871	0.00107933	0.0186653	453.932	-3.26899
ITPKC	675.087	631.754	573.762	546.575	1.15754	0.211066	0.00108032	0.0186653	606.795	3.26873
SLC2A10	1194.17	1216.72	1103.04	1157.74	1.08478	0.117402	0.00108359	0.0186993	1167.92	3.26787
PLXNB1	1940.85	2151.61	1768.46	1948.77	1.09691	0.133451	0.00108521	0.0187049	1952.42	3.26745
MYO16	13.9475	15.7593	5.78935	5.65663	1.25237	0.324664	0.00109297	0.0188162	10.2882	3.26543
RP11-793H13.8	78.4758	177.925	23.1326	114.828	1.00462	0.00665481	0.00109795	0.0188795	98.5903	3.26415
SEMA3C	5728.59	7679.56	4599.92	6117.74	1.23921	0.30942	0.00110006	0.0188933	6031.45	3.2636
MICAL1	3127.64	3370.09	2858.07	2914.83	1.10087	0.138643	0.00110969	0.019036	3067.66	3.26113
NDUFV2	532.166	530.751	597.241	519.534	-1.12033	-0.163922	0.00112285	0.0192389	544.923	-3.25779
GRIA3	412.776	443.912	487.568	513.459	-1.15482	-0.207663	0.0011363	0.0194464	464.429	-3.25441
FAM211A	41.7641	36.2875	64.9653	54.4829	-1.29208	-0.369694	0.00114822	0.0196272	49.3749	-3.25144
RASSF8	1683.54	1629.08	1882.33	1855.23	-1.11627	-0.158681	0.00116472	0.0198857	1762.55	-3.24738
SPIRE1	691.48	735.357	779.942	787.638	-1.12391	-0.168525	0.00116733	0.0199066	748.604	-3.24675
SPATC1L	320.619	280.312	256.954	252.382	1.18974	0.250651	0.00117576	0.0200268	277.567	3.2447
CGNL1	90.4195	111.315	56.2265	61.0944	1.29122	0.368734	0.00117918	0.0200613	79.7639	3.24387
KCNN2	141.207	140.432	83.4886	86.6459	1.28124	0.357537	0.00118828	0.0201924	112.943	3.24168
NFIC	3903.81	3553.77	3573.86	3409.62	1.09168	0.126556	0.0012002	0.020371	3610.27	3.23883
FAM180A	591.177	607.391	675.94	678.291	-1.13588	-0.183806	0.00120402	0.0204068	638.2	-3.23793
PPP5C	872.378	867.49	973.432	918.893	-1.11027	-0.150908	0.00120514	0.0204068	908.048	-3.23766
TPRA1	544.646	580.488	475.774	504.48	1.1339	0.181295	0.00121392	0.0205315	526.347	3.23559
SEPHS1	443.834	470.696	528.184	534.81	-1.16173	-0.216276	0.00122305	0.0206618	494.381	-3.23345
CCND1	15300.6	15805.5	16513.2	16980.4	-1.08756	-0.121091	0.00122813	0.0207233	16149.9	-3.23227
FCHO2	515.211	498.611	583.992	551.116	-1.12432	-0.169051	0.00123055	0.0207399	537.233	-3.2317
ST3GAL1	975.64	977.747	844.447	841.902	1.1466	0.197366	0.00123532	0.020796	909.934	3.2306
PVRL2	712.688	697.881	629.502	643.039	1.1135	0.155106	0.00124445	0.0209254	670.778	3.22849
SDC3	2287.08	2406.55	2524.56	2648.76	-1.10138	-0.139319	0.00124727	0.0209483	2466.74	-3.22784
ESR1	50.0511	43.2885	71.8335	61.6628	-1.2726	-0.347774	0.0012489	0.0209514	56.709	-3.22747
IGFBP3	4518.9	4886.76	6907.08	8751.59	-1.26897	-0.343659	0.00125699	0.0210138	6266.08	-3.22562
P2RY1	22.7394	34.1018	10.0072	12.5077	1.26895	0.343635	0.00125611	0.0210138	19.839	3.22582
SLC38A5	108.416	113.599	141.384	130.446	-1.2414	-0.311969	0.0012563	0.0210138	123.461	-3.22578
SLC22A15	156.275	174.95	117.64	122.74	1.22383	0.291401	0.00127259	0.0212351	142.901	3.22209
STXBP5	701.472	669.965	791.674	773.638	-1.12112	-0.164939	0.00127317	0.0212351	734.187	-3.22196
RP4-758J24.5	69.3557	57.8907	49.8587	46.518	1.27045	0.345334	0.00127569	0.0212527	55.9058	3.22139
ATP2A2	4750.92	4849.74	4407.01	4680.21	1.07589	0.105526	0.0012879	0.0214068	4671.97	3.21866
S1PR3	1665.32	1700.02	1914.35	2060.25	-1.13884	-0.187561	0.00128704	0.0214068	1834.99	-3.21885
TP53INP1	1212.68	1255.78	1341.42	1310.02	-1.10098	-0.138793	0.00129102	0.0214339	1279.98	-3.21797
PTAR1	1090.43	1095.78	955.335	1052.34	1.124	0.168637	0.00129303	0.0214427	1048.47	3.21752
ANXA5	14535.8	13733.3	15638.1	14828.3	-1.07302	-0.101676	0.00129497	0.0214502	14683.9	-3.21709
SPATS2L	2380.13	2414.73	2183.16	2191.27	1.08488	0.117535	0.00129892	0.0214909	2292.32	3.21622
EIF5	3138.24	3001.45	3358.83	3171.57	-1.06995	-0.0975452	0.00132891	0.0219619	3167.53	-3.20966
MAP2K6	39.4213	26.0599	62.6311	48.0634	-1.29471	-0.372633	0.00133229	0.0219927	44.0439	-3.20893
CBWD3	38.4874	55.3004	65.5982	46.1507	-1.28536	-0.362172	0.00134537	0.0221833	51.3842	-3.20612
C1QTNF1	534.381	480.361	449.635	472.335	1.15946	0.213455	0.00135217	0.0222589	484.178	3.20467
PTGER2	52.2063	39.3381	32.5594	25.8943	1.29509	0.37305	0.00135304	0.0222589	37.4995	3.20449
AKR1C3	283.538	314.27	355.409	398.433	-1.1932	-0.254838	0.00135606	0.0222832	337.912	-3.20384
MTSS1	142.992	158.584	194.316	205.938	-1.25112	-0.323224	0.00136098	0.0223132	175.458	-3.2028
RAB11FIP1	126.331	106.649	96.662	98.4164	1.23137	0.300262	0.00135988	0.0223132	107.015	3.20303
C12orf5	176.631	187.355	214.028	206.05	-1.20024	-0.26332	0.00136556	0.0223377	196.016	-3.20183
QPCT	246.102	262.96	297.472	280.835	-1.18099	-0.239992	0.00136432	0.0223377	271.842	-3.20209
ENAH	1863.68	1961.29	1732.2	1884.5	1.07508	0.104451	0.0013829	0.0225813	1860.42	3.1982
KCNT2	63.7666	53.1044	44.032	30.7751	1.27985	0.35598	0.00138358	0.0225813	47.9195	3.19805
CDC42EP3	3992.02	3517.3	3454.95	2952.45	1.15206	0.20422	0.00140023	0.0228016	3479.18	3.1946
SMARCA1	1353.14	1210.62	1481.86	1424.35	-1.09097	-0.125611	0.00139932	0.0228016	1367.49	-3.19479
SIPA1L1	1173.99	1089.09	1349.17	1313.41	-1.12228	-0.166435	0.0014038	0.0228339	1231.42	-3.19387
DKFZP761J1410	911.957	950.973	807.277	896.593	1.11119	0.152111	0.00140984	0.0229063	891.7	3.19263
C16orf45	2334.04	2243.58	2653.62	2605.71	-1.12114	-0.16497	0.0014243	0.0231152	2459.24	-3.18968
NRD1	2200.26	2160.72	2369.46	2285.76	-1.08092	-0.112258	0.00142682	0.0231302	2254.05	-3.18917
PGM1	892.455	878.929	810.667	786.505	1.10263	0.140947	0.00143776	0.0232815	842.139	3.18696
C12orf44	552.963	521.048	474.576	462.089	1.13591	0.183844	0.00144795	0.0233853	502.669	3.18492
FAM20A	275.608	261.293	352.147	328.597	-1.20255	-0.266095	0.00145065	0.0233853	304.411	-3.18438
RELB	117.041	127.187	144.696	162.176	-1.23086	-0.299672	0.00144601	0.0233853	137.775	-3.18531
SGSM2	1303.13	1263.08	1445.13	1323.04	-1.10072	-0.138452	0.00144962	0.0233853	1333.59	-3.18458
CAPS	287.822	255.419	244.713	196.83	1.17026	0.226834	0.00145498	0.0234028	246.196	3.18352
SEC62	2287.21	2471.55	2073.11	2246.15	1.09839	0.135395	0.00145425	0.0234028	2269.5	3.18366
HMG20A	460.936	436.028	394.48	406.405	1.14921	0.200641	0.00147011	0.0236198	424.462	3.18052
TSPAN5	1587.8	1404.06	1781.56	1462.39	-1.12609	-0.171324	0.00148318	0.0238034	1558.95	-3.17795
DGKA	1382.56	1344.87	1521.24	1480.29	-1.09368	-0.129195	0.00148529	0.0238108	1432.24	-3.17754
EPDR1	993.193	1061.42	859.4	920.298	1.13548	0.183296	0.00149577	0.0239427	958.577	3.1755
MLLT6	1771.58	1819.52	1673.45	1824.03	1.0755	0.10501	0.00149683	0.0239427	1772.14	3.1753
PODNL1	254.731	241.833	209.302	210.662	1.20124	0.264522	0.00149862	0.0239448	229.132	3.17495
UBL3	1439.79	1393.32	1599.83	1509.3	-1.10875	-0.14893	0.00150902	0.0240843	1485.56	-3.17294
TYMS	367.129	340.642	447.813	383.602	-1.1817	-0.240861	0.00151655	0.0241778	384.796	-3.1715
OSBPL8	1848.83	1949.86	2057.57	2185.05	-1.10249	-0.140766	0.00152685	0.0243151	2010.33	-3.16953
TM2D1	303.483	310.403	259.604	268.629	1.15197	0.204105	0.00153004	0.0243391	285.53	3.16893
HMGA2	969.03	867.889	1139.06	1058.92	-1.14812	-0.199278	0.00153279	0.024356	1008.73	-3.1684
BRD4	1401.81	1349.6	1269.64	1276.88	1.09709	0.13368	0.00153544	0.0243713	1324.48	3.1679
SIRPA	1562.89	1704.58	1727.65	1859.03	-1.1083	-0.148347	0.00153944	0.024408	1713.54	-3.16714
ARHGAP24	457.846	375.835	390.931	347.65	1.15088	0.202743	0.0015441	0.0244283	393.065	3.16626
CLASP1	1081.39	1126.45	967.63	997.767	1.11209	0.153268	0.00154295	0.0244283	1043.31	3.16648
ABCB6	334.314	349.622	286.637	321.948	1.15582	0.208922	0.00155383	0.0245552	323.131	3.16444
KIF13A	2229.08	2047.99	2427.41	2247.31	-1.07849	-0.109019	0.00156922	0.0247714	2237.95	-3.16157
PPFIA4	55.155	52.7543	82.2749	74.6851	-1.2787	-0.354673	0.0015799	0.0249128	66.2174	-3.15959
METRNL	2235.98	2341.69	1929.27	2087.36	1.14832	0.199528	0.00160886	0.0253417	2148.58	3.1543
ALDH18A1	1155.7	1126.44	1059.21	1038.39	1.08486	0.117508	0.00162463	0.0255623	1094.94	3.15145
TRIM22	2481.12	2656.28	2245.95	2314.07	1.10102	0.138843	0.00163159	0.0256438	2424.35	3.1502
GBP3	424.822	409.484	497.888	459.711	-1.13866	-0.187335	0.00163453	0.025657	447.976	-3.14967
GLB1	1912.78	1952.42	1761.74	1778.85	1.0869	0.120216	0.00163953	0.025657	1851.45	3.14878
IRF2BPL	976.077	944.033	858.72	871.624	1.13365	0.180969	0.00163636	0.025657	912.613	3.14935
NNMT	913.801	964.107	752.153	860.268	1.18355	0.243127	0.0016392	0.025657	872.582	3.14884
ITPR3	2684.65	2642.53	2972.22	2895.81	-1.10285	-0.141231	0.0016433	0.0256826	2798.8	-3.14811
OLFML2A	3795.53	4223.44	4962.56	5412.44	-1.24859	-0.320297	0.00164472	0.0256826	4598.49	-3.14786
PTPN14	2083.6	2107.94	2270.08	2367.34	-1.09671	-0.133179	0.00164721	0.0256936	2207.24	-3.14742
TGFBR2	3742.31	3965.19	3496.92	3714.55	1.06705	0.0936331	0.00166288	0.0259101	3729.74	3.14465
SLC19A2	141.427	156.571	107.645	117.841	1.2261	0.294075	0.00167212	0.0260259	130.871	3.14302
VGLL3	8926.43	9699.56	9982.44	10815.3	-1.09281	-0.128039	0.00169557	0.0263626	9855.94	-3.13895
ELF1	1027.35	1072.15	875.693	873.415	1.15507	0.207979	0.00173007	0.02687	962.153	3.13304
MN1	1537.58	1447.93	1360.47	1374.89	1.129	0.175049	0.00174675	0.0270709	1430.22	3.13022
NDRG1	2615.04	2416.76	2817.17	2653.4	-1.08201	-0.113711	0.00174654	0.0270709	2625.59	-3.13026
RABEP1	1207.62	1291.75	1329.45	1358.54	-1.09216	-0.127184	0.00175127	0.0271119	1296.84	-3.12946
DAPK2	257.058	206.079	329.65	279.474	-1.21148	-0.276771	0.00175801	0.0271579	268.065	-3.12833
TRMT2B	184.461	179.356	230.573	226.341	-1.20686	-0.271258	0.00175794	0.0271579	205.183	-3.12834
CBX5	1489.73	1531.39	1650.14	1721.62	-1.0998	-0.13724	0.00176511	0.0272385	1598.22	-3.12715
NUDT16	1330.55	1280.47	1211.66	1284.02	1.09334	0.128736	0.00177211	0.0273173	1276.67	3.12598
SETBP1	387.544	377.162	333.459	319.075	1.15605	0.209208	0.00178562	0.0274963	354.31	3.12375
HAND2	66.3853	68.9034	45.4578	51.4123	1.27277	0.347973	0.00178904	0.0275196	58.0397	3.12319
FAM126A	1865.02	2020.61	2120.65	2247.37	-1.1174	-0.160145	0.00179587	0.0275952	2063.42	-3.12207
DUSP14	685.268	671.812	766.326	744.836	-1.1364	-0.184475	0.00180495	0.0276466	717.061	-3.12058
MYO1E	937.295	972.949	1075.3	1130.27	-1.12526	-0.170256	0.00180424	0.0276466	1028.95	-3.1207
RP11-443P15.2	212.907	289.414	171.797	211.482	1.19115	0.252353	0.00180298	0.0276466	221.4	3.1209
KIFAP3	734.665	743.076	660.458	697.095	1.1117	0.152762	0.00181359	0.0276506	708.824	3.11917
LIMS2	1399.01	1444.43	1239.78	1326.15	1.14215	0.191755	0.00181479	0.0276506	1352.34	3.11898
MLPH	208.304	178.993	255.821	212.431	-1.20009	-0.263142	0.0018137	0.0276506	213.887	-3.11916
PRNP	4336.13	4885.12	4645	5269.76	-1.07457	-0.103759	0.00181425	0.0276506	4784	-3.11907
STX3	255.283	248.326	300.676	297.353	-1.15273	-0.205057	0.00180765	0.0276506	275.41	-3.12014
PYGB	3296.3	2769.05	2914	2581.6	1.10759	0.147427	0.00182209	0.0277072	2890.24	3.1178
TPP2	931.164	939.642	1035.48	1042.96	-1.1019	-0.139998	0.00182233	0.0277072	987.313	-3.11776
IL6R	155.568	164.327	194.05	217.435	-1.19532	-0.257397	0.00183299	0.0278398	182.845	-3.11604
FAM46C	260.092	217.799	338.792	257.421	-1.21849	-0.285098	0.00184754	0.0280314	268.526	-3.1137
ERBB3	48.0965	48.5436	74.761	65.5165	-1.27601	-0.351642	0.00185159	0.0280633	59.2294	-3.11306
FHOD3	491.622	579.383	607.791	716.104	-1.19589	-0.258089	0.00186859	0.0282913	598.725	-3.11036
DPY19L1	782.402	867.415	869.057	964.483	-1.10584	-0.145149	0.00187259	0.0283139	870.839	-3.10973
TMEM164	153.172	149.215	191.284	182.92	-1.20873	-0.273487	0.001874	0.0283139	169.148	-3.10951
MMP17	322.068	337.799	260.758	287.774	1.18537	0.24534	0.00189564	0.0286108	302.1	3.10611
PCNA	542.976	585.884	627.287	631.378	-1.14376	-0.193785	0.00190058	0.0286256	596.881	-3.10534
POLD4	507.827	374.22	414.056	382.012	1.19254	0.254038	0.00190031	0.0286256	419.529	3.10539
CISD1	116.663	124.104	145.932	142.09	-1.20898	-0.273785	0.00190788	0.0287057	132.197	-3.10421
MARCH6	2558	2560.95	2387.25	2354.57	1.07194	0.10022	0.00191418	0.0287705	2465.19	3.10323
NPEPPS	2213.89	2296.11	2389.87	2346.11	-1.07448	-0.103633	0.00191964	0.0288225	2311.5	-3.10239
DBNDD2	349.544	359.498	305.698	327.904	1.15472	0.207541	0.0019274	0.0288985	335.661	3.1012
NOL3	297.953	292.567	250.17	273.131	1.16831	0.224417	0.0019287	0.0288985	278.455	3.101
FMNL1	199.626	173.365	245.083	235.409	-1.1842	-0.243916	0.00193118	0.0289056	213.371	-3.10062
TMEM25	342.494	264.027	290.955	243.173	1.15688	0.210236	0.00193681	0.02896	285.163	3.09975
AHRR	1917.6	1784.89	2150.63	1974.5	-1.11237	-0.153638	0.00194303	0.0290228	1956.9	-3.09881
KRTAP1-5	610.893	458.869	683.21	567.351	-1.19558	-0.257711	0.00196622	0.029308	580.081	-3.09529
VPS26A	920.251	956.165	1002.11	994.251	-1.08884	-0.122786	0.0019682	0.029308	968.194	-3.09499
ZNF706	445.796	449.247	504.213	467.843	-1.12242	-0.166607	0.00196545	0.029308	466.775	-3.0954
CSRP1	2630.24	2582.78	2307.82	2213.81	1.11402	0.155775	0.00197669	0.0293897	2433.66	3.09371
TPPP3	63.0927	37.6062	100.919	45.7245	-1.29911	-0.377529	0.00197776	0.0293897	61.8355	-3.09355
AGL	435.419	459.663	373.587	396.944	1.15031	0.202026	0.00199754	0.0296531	416.403	3.0906
DNAJB2	1141.61	1233.06	1247.99	1308.65	-1.08513	-0.11787	0.00200282	0.029701	1232.83	-3.08981
NFYB	308.166	333.752	363.181	369.218	-1.15005	-0.201702	0.00200691	0.029731	343.579	-3.08921
AIDA	1937.39	2040.39	2092.65	2126.13	-1.07805	-0.108427	0.00202017	0.0298689	2049.14	-3.08725
MID1IP1	840.307	833.736	709.064	736.89	1.15652	0.209795	0.00202035	0.0298689	779.999	3.08722
ANO6	2673.56	2850.02	2496.06	2652.16	1.07794	0.108277	0.00203925	0.0300925	2667.95	3.08446
ITGB8	161.934	211.227	205.4	266.794	-1.20009	-0.263143	0.00204256	0.0300925	211.339	-3.08397
SDCCAG8	312.357	287.983	366.357	316.732	-1.15409	-0.206757	0.00204348	0.0300925	320.857	-3.08384
STT3B	2253.73	2496.95	2096.78	2279.42	1.07835	0.108822	0.00204381	0.0300925	2281.72	3.08379
TP53I13	340.446	331.903	287.519	310.931	1.16457	0.219803	0.0020697	0.0304427	317.7	3.08004
AHR	1913.75	2224.39	1684.05	1924.59	1.13805	0.186563	0.00208318	0.0306089	1936.69	3.07811
COMMD7	373.615	364.42	420.371	396.941	-1.12191	-0.165953	0.00208523	0.0306089	388.837	-3.07782
ACE	1306.39	1310.17	1144.92	1134.29	1.14384	0.193882	0.00210467	0.0308628	1223.94	3.07505
ERLEC1	1351.37	1377.49	1206.74	1299.81	1.10386	0.142552	0.00211174	0.0309351	1308.85	3.07405
LPIN1	3961.48	3948.47	4268.99	4169.08	-1.08324	-0.115357	0.00213063	0.0311485	4087	-3.07139
TMEM144	68.501	82.1363	49.7134	60.5484	1.25258	0.324898	0.0021303	0.0311485	65.2248	3.07144
PIK3R3	91.4062	100.338	119.817	119.35	-1.23834	-0.308409	0.00213797	0.0312244	107.728	-3.07036
COMT	1986.71	1978.62	1768.8	1839.51	1.09988	0.137346	0.00214503	0.0312643	1893.41	3.06938
IGF2R	6028.32	6434.02	5690.5	6043.2	1.07271	0.101264	0.00214476	0.0312643	6049.01	3.06942
ACAD9	397.167	412.182	450.77	461.145	-1.12409	-0.168758	0.00217081	0.031608	430.316	-3.06581
FAM86HP	65.3089	61.6957	90.4755	65.6051	-1.25591	-0.328738	0.00217449	0.0316297	70.7713	-3.0653
HNRNPH2	1071.91	1036.77	1174.74	1116.83	-1.09157	-0.126399	0.00218815	0.0317644	1100.06	-3.06343
RP11-357C3.3	307.33	284.287	257.675	282.308	1.16764	0.223591	0.0021864	0.0317644	282.9	3.06367
EFS	952.764	974.778	849.402	904.549	1.12125	0.165109	0.00219174	0.0317846	920.373	3.06294
SLC39A6	1943.57	2066.98	1791.65	1949.01	1.07952	0.110389	0.00219954	0.0318658	1937.8	3.06188
CDCA7L	340.308	295.186	398.001	318.916	-1.14937	-0.200843	0.00220341	0.0318855	338.103	-3.06135
ISL2	109.689	132.051	77.3898	73.6584	1.25268	0.325014	0.00220532	0.0318855	98.1969	3.06109
TMTC2	169.291	177.888	212.87	212.448	-1.20161	-0.264974	0.00225477	0.0325679	193.124	-3.05445
RAB22A	967.444	1041.21	1088.38	1116.15	-1.11375	-0.155424	0.00226201	0.0326399	1053.3	-3.05348
CBLB	512.045	545.784	461.644	496.51	1.123	0.16736	0.00227288	0.032764	503.996	3.05204
CFB	244.004	235.727	305.428	273.521	-1.18432	-0.244062	0.00228485	0.0329037	264.67	-3.05047
SAR1A	2522.75	2451.68	2666.59	2608.53	-1.06324	-0.0884618	0.00228999	0.0329448	2562.39	-3.04979
MPC2	452.607	432.945	399.457	415.609	1.12964	0.175867	0.00230125	0.033041	425.155	3.04832
TCHP	276.19	308.724	321.999	290.109	-1.14664	-0.197415	0.00230109	0.033041	299.256	-3.04834
SPATA6	185.526	168.906	154.402	135.356	1.18262	0.241985	0.002327	0.0333775	161.048	3.04498
RP11-426C22.4	44.9983	39.0805	65.473	54.9338	-1.26487	-0.338986	0.00233303	0.0334309	51.1214	-3.0442
SLC12A9	583.792	575.444	520.454	528.532	1.11059	0.151326	0.00233628	0.0334442	552.055	3.04378
RP11-266K4.9	10.0148	10.5663	19.8883	15.2674	-1.2606	-0.33411	0.00233871	0.0334458	13.9342	-3.04346
FLNA	41883.2	44016.6	38322.1	41130.8	1.08248	0.114342	0.00235835	0.0336933	41338.2	3.04095
APOE	78.9929	84.2107	48.4127	54.0509	1.26956	0.344327	0.00236632	0.0337738	66.4168	3.03993
AVIL	51.9515	38.4068	31.116	29.8986	1.28406	0.360708	0.00237867	0.0338498	37.8432	3.03836
LRRC8C	264.328	245.982	334.653	292.769	-1.20482	-0.268812	0.00237765	0.0338498	284.433	-3.03849
PAQR5	116.107	108.722	153.636	140.118	-1.23817	-0.308214	0.00237464	0.0338498	129.646	-3.03887
CCNG1	3535.97	3287.72	3815.61	3400.88	-1.07895	-0.109632	0.00240239	0.0341537	3510.04	-3.03537
SYT1	112.925	116.642	72.9936	68.4941	1.26564	0.33987	0.00241121	0.0342454	92.7635	3.03427
SIMC1	170.314	154.971	139.73	135.36	1.19062	0.251715	0.00242865	0.0344591	150.094	3.03209
FER1L4	141.193	86.088	102.566	65.5017	1.2586	0.331816	0.00245971	0.0348656	98.8372	3.02825
SLC7A11	4395.6	4792.39	3856.68	4298.79	1.1092	0.149517	0.00248399	0.0351753	4335.86	3.02528
FBLN5	6932.1	6707.58	6219.46	5943.92	1.10826	0.148296	0.00249988	0.035331	6450.77	3.02336
RP11-552F3.12	7.55339	12.4679	17.5769	8.18196	-1.10543	-0.144612	0.00249769	0.035331	11.445	-3.02362
EPHX1	2273.44	2446.02	2045.21	2269.09	1.10253	0.140821	0.00250345	0.0353468	2258.44	3.02292
TGFB1	1489.49	1372.38	1318.15	1288.38	1.11308	0.154553	0.00250866	0.0353859	1367.1	3.02229
TCEAL3	641.269	589.82	567.962	517.626	1.11373	0.155399	0.00252095	0.0355245	579.169	3.02082
CTD-2369P2.2	430.042	395.977	367.655	364.991	1.16037	0.214581	0.00254658	0.0358506	389.666	3.01775
MEG3	20117.8	19500.8	22919.9	20581.3	-1.11625	-0.15866	0.00256165	0.0359927	20780	-3.01596
UHRF2	765.261	789.8	860.484	855.619	-1.11825	-0.161249	0.00256027	0.0359927	817.791	-3.01613
FRY	682.027	802.396	565.485	664.07	1.1607	0.214994	0.00258909	0.0363389	678.495	3.01273
MSI2	545.475	512.266	475.354	442.338	1.14467	0.19493	0.00259636	0.0363389	493.858	3.01188
SH3PXD2A	4205.78	4144.53	4440.92	4606.97	-1.06691	-0.0934439	0.00259228	0.0363389	4349.55	-3.01236
SMAD1	130.051	120.005	162.8	144.296	-1.19667	-0.259023	0.00259524	0.0363389	139.288	-3.01201
ADAMTSL5	567.165	599.237	502.425	589.221	1.13778	0.186219	0.00260892	0.0364794	564.512	3.01041
KLHL13	35.8871	33.5463	53.8748	41.0629	-1.27047	-0.345359	0.0026328	0.0367421	41.0928	-3.00765
RTEL1-TNFRSF6B	262.754	193.874	200.944	171.384	1.23444	0.303856	0.00263127	0.0367421	207.239	3.00782
RABAC1	1272.93	1178.76	1098.48	1085.25	1.13117	0.17781	0.00265397	0.0369662	1158.85	3.00521
RUNX2	117.089	89.4305	81.9462	57.984	1.25052	0.322532	0.00265362	0.0369662	86.6123	3.00525
IFI16	1490.25	1371.22	1654.19	1434.18	-1.10094	-0.138733	0.00266684	0.037074	1487.46	-3.00374
SOCS5	820.285	803.632	923.676	827.076	-1.12065	-0.164342	0.00266674	0.037074	843.667	-3.00375
H3F3AP4	394.046	398.6	447.131	409.591	-1.14174	-0.191232	0.00267289	0.0371224	412.342	-3.00305
EFTUD2	690.807	712.457	773.104	719.442	-1.11323	-0.154754	0.00270326	0.0375081	723.953	-2.99961
EIF3G	1778.16	1777.19	1648.7	1645.63	1.07379	0.102713	0.00270726	0.0375275	1712.42	2.99916
AJUBA	781.245	821.92	865.192	1009.99	-1.1061	-0.145487	0.0027112	0.0375461	869.588	-2.99872
SPRY2	374.803	343.079	478.898	441.296	-1.20916	-0.274001	0.00271945	0.0376243	409.519	-2.99779
JPH2	91.2151	117.531	64.9837	83.4387	1.2383	0.308366	0.00272346	0.0376437	89.2921	2.99734
CNOT6	307.16	346.818	359.794	351.431	-1.15051	-0.20227	0.00273148	0.0377185	341.301	-2.99644
TSKU	640.592	649.609	571.118	604.468	1.11222	0.153446	0.0027381	0.0377738	616.447	2.99571
KCNK2	1167.55	1067.04	1365.48	1222.94	-1.13495	-0.18263	0.00274388	0.0378174	1205.75	-2.99506
GUCY1A2	309.008	495.629	363.315	599.86	-1.18813	-0.248696	0.00274863	0.0378467	441.953	-2.99454
SYNGR2	376.755	374.629	307.483	300.118	1.17288	0.230055	0.0027634	0.0380138	339.746	2.9929
MALAT1	4357.71	4436.83	4924.02	4561.89	-1.11283	-0.154227	0.00277876	0.0381888	4570.11	-2.99121
DAAM1	195.212	199.326	233.667	220.89	-1.16285	-0.217662	0.00278489	0.0382366	212.274	-2.99054
PCNXL2	972.346	912.139	1110.12	996.674	-1.11492	-0.156943	0.00279244	0.038304	997.821	-2.98971
EML3	649.201	626.555	580.84	594.002	1.10741	0.147192	0.00280967	0.0385036	612.649	2.98783
COL15A1	1410.75	1134.47	1065.41	762.181	1.23605	0.305733	0.0028173	0.0385716	1093.2	2.987
INHBA	762.444	709.017	880.374	825.192	-1.16827	-0.22438	0.00284272	0.0388828	794.257	-2.98425
CDKN2C	216.605	201.591	261.27	219.297	-1.16767	-0.223627	0.00285777	0.0390517	224.691	-2.98264
GBE1	2278.14	2539.34	2002.11	2096.25	1.11545	0.157621	0.00287001	0.0391819	2228.96	2.98133
GALNT5	1075.68	988.522	1159.85	1068.95	-1.1044	-0.143267	0.00288824	0.0393267	1073.25	-2.97939
SLC43A3	227.438	237.061	279.506	277.196	-1.19105	-0.252233	0.00288879	0.0393267	255.3	-2.97933
ZFP91	1946.51	1950.19	2126.36	2201.88	-1.09313	-0.128462	0.00288718	0.0393267	2056.23	-2.9795
SNN	418.394	459.165	480.469	515.571	-1.13327	-0.180488	0.00289935	0.0394333	468.4	-2.97821
FZD6	721.528	648.693	622.045	587.303	1.11907	0.162299	0.00290525	0.0394764	644.892	2.97759
IGFBP6	7920.96	6092.05	6989.99	5612.54	1.12607	0.171293	0.00291119	0.0394849	6653.89	2.97696
LONRF1	356.139	377.115	301.251	316.483	1.15265	0.20496	0.00291134	0.0394849	337.747	2.97695
CERS2	2220.58	2317.09	2060.61	2177.76	1.07219	0.100563	0.0029206	0.0395734	2194.01	2.97597
MAP1LC3B	2039.09	2100.39	2177.97	2279.72	-1.07095	-0.0988976	0.00293736	0.039763	2149.29	-2.97422
DYNLT3	602.915	607.759	674.307	644.027	-1.11708	-0.159728	0.00294692	0.0398552	632.252	-2.97322
RDH5	182.509	219.023	221.543	234.127	-1.17877	-0.237283	0.00295262	0.0398948	214.301	-2.97263
LRRN4CL	1177.44	1294.76	1359.32	1594.81	-1.14902	-0.2004	0.00296087	0.039969	1356.58	-2.97177
APCDD1L-AS1	57.5919	62.6556	74.4229	66.3407	-1.23277	-0.301903	0.00297659	0.0401437	65.2528	-2.97014
RNF38	482.77	515.135	430.44	456.3	1.11908	0.16231	0.00301232	0.0405876	471.161	2.96648
KIFC3	552.372	574.699	605.802	614.26	-1.10574	-0.145013	0.00301659	0.0406074	586.783	-2.96604
PDGFRA	7970.92	6779.21	8849.14	7544.22	-1.1099	-0.150431	0.00302586	0.0406564	7785.87	-2.9651
PFKFB3	443.506	440.973	513.697	520.447	-1.14066	-0.18987	0.00302504	0.0406564	479.656	-2.96518
DOCK8	31.9026	32.2286	18.7051	19.13	1.25605	0.328893	0.00303844	0.0407874	25.4916	2.96382
PPIF	337.497	343.576	382.757	416.788	-1.13466	-0.182259	0.00304359	0.0408186	370.155	-2.9633
MAGT1	1192.38	1337.49	1285.51	1328.25	-1.07841	-0.108909	0.00305642	0.0409526	1285.9	-2.96201
CCND3	369.514	375.459	305.957	340.257	1.15488	0.207743	0.0030639	0.0410119	347.797	2.96125
PPIL6	41.5658	43.1115	26.0451	29.6685	1.26226	0.336011	0.00306653	0.0410119	35.0977	2.96099
MAB21L1	980.702	976.755	1087.55	990.991	-1.0987	-0.135801	0.00306944	0.041013	1009	-2.9607
YWHAQ	5333.31	5028.87	5736.14	5239.84	-1.07495	-0.104265	0.0030723	0.0410132	5334.54	-2.96041
C1orf86	542.927	518.532	464.453	489.638	1.1462	0.19686	0.0030762	0.0410274	503.887	2.96002
TRIM25	1537.91	1495.57	1652.58	1545.09	-1.0868	-0.120093	0.00308634	0.0411246	1557.79	-2.95901
DCN	46400.4	54475.6	44026.3	51284.3	1.08917	0.123225	0.00309844	0.0412478	49046.7	2.9578
RDH10	918.074	1244.14	1204.99	1620.65	-1.23172	-0.300676	0.00310395	0.041283	1246.96	-2.95725
PRR15	25.4013	29.4706	12.2244	15.2957	1.24952	0.321372	0.0031222	0.0414876	20.598	2.95544
IL4R	452.733	414.911	520.858	474.153	-1.14268	-0.192427	0.00314163	0.0416691	465.663	-2.95353
SRPRB	553.4	554.226	486.005	499.335	1.11598	0.158312	0.00314159	0.0416691	523.241	2.95353
TLK1	1004.7	1141.76	1117.04	1243.58	-1.1076	-0.147443	0.00315507	0.041809	1126.77	-2.95221
ABCD1	395.278	374.169	338.614	376.937	1.15214	0.204318	0.00318671	0.0421124	371.25	2.94913
BCAT1	1666.19	1578.82	1865.4	1711.26	-1.09742	-0.134114	0.00318402	0.0421124	1705.42	-2.94939
FGD6	103.483	85.0327	132.144	111.455	-1.21486	-0.280792	0.00318176	0.0421124	108.029	-2.94961
UBE2F	666.731	677.89	734.838	739.162	-1.09594	-0.132168	0.00320122	0.0422655	704.655	-2.94772
ARHGAP18	778.905	779.74	690.991	691.093	1.12197	0.166033	0.00320814	0.0423182	735.182	2.94706
MAPT	58.3711	80.9562	80.4051	97.3851	-1.24082	-0.31129	0.0032167	0.0423923	79.2794	-2.94623
CYB5R2	358.883	330.484	310.833	291.432	1.12986	0.176149	0.00322201	0.0424236	322.908	2.94572
SH3PXD2B	1959.01	2095.15	1832.64	1972.03	1.10154	0.13952	0.00322668	0.0424464	1964.71	2.94527
SPEN	1035.05	1071	1127.03	1160.25	-1.08234	-0.114158	0.00326355	0.0428924	1098.33	-2.94176
ZMAT3	2828.89	3111.21	3081.33	3309.09	-1.09097	-0.125611	0.00328662	0.0431563	3082.63	-2.93958
PIR	212.268	240.689	182.904	198.4	1.16766	0.223622	0.0033639	0.0441309	208.565	2.93237
MID2	147.226	127.87	120.489	124.817	1.19142	0.252686	0.00338892	0.0443785	130.101	2.93006
RCAN3	211.576	177.811	173.535	159.47	1.1936	0.255321	0.0033881	0.0443785	180.598	2.93014
RASL11B	15.3643	13.0748	7.66176	6.18587	1.23574	0.305378	0.00339881	0.0444678	10.5717	2.92916
FIG4	375.429	407.436	430.134	458.218	-1.13099	-0.177583	0.00340902	0.0445602	417.804	-2.92823
TSPAN11	130.392	126.198	97.2115	97.2882	1.24008	0.310429	0.00341205	0.0445602	112.772	2.92795
NBPF1	1657.8	1684.7	1848	1838.41	-1.09828	-0.135241	0.00342629	0.0446654	1757.23	-2.92665
TMEM132B	110.724	118.463	154.818	179.103	-1.24046	-0.310873	0.00342606	0.0446654	140.777	-2.92668
CHRDL1	691.648	800.154	833.275	963.157	-1.16692	-0.2227	0.00343376	0.0447225	822.059	-2.92598
F8A1	327.177	283.534	283.748	287.847	1.14872	0.200032	0.00348883	0.0453987	295.576	2.92102
GDPD3	54.1534	51.8268	39.7894	47.9678	1.24705	0.318516	0.00352397	0.0458148	48.4343	2.9179
ANGPTL1	54.388	66.4206	36.9127	36.6324	1.24851	0.320205	0.00353722	0.0459457	48.5884	2.91673
PCGF5	926.721	979.374	832.887	881.632	1.11114	0.152039	0.00354086	0.0459516	905.154	2.91641
EIF1AX	1773.69	1901.51	1611.37	1697.9	1.09193	0.126883	0.00358007	0.0463356	1746.12	2.91297
LPIN3	593.621	540.478	520.035	485.534	1.12798	0.173736	0.00357497	0.0463356	534.917	2.91342
XPO7	1067.43	1107.36	1164.55	1179.24	-1.08743	-0.120918	0.00357924	0.0463356	1129.64	-2.91304
AARS2	186.492	205.246	221.77	233.817	-1.16091	-0.215254	0.00359322	0.0463811	211.831	-2.91183
DGKZ	837.441	837.011	923.361	940.566	-1.09729	-0.133951	0.00358976	0.0463811	884.595	-2.91213
TNFAIP6	27.7102	32.3984	43.05	43.2975	-1.25723	-0.330253	0.00359224	0.0463811	36.614	-2.91191
COPS4	710.991	689.488	786.979	707.802	-1.10413	-0.142914	0.00361195	0.0465813	723.815	-2.9102
YTHDF1	544.48	583.827	603.312	595.726	-1.10275	-0.1411	0.00367449	0.0473455	581.836	-2.90483
IL20RB	567.171	614.112	501.599	505.267	1.12225	0.166393	0.00369651	0.0475869	547.037	2.90296
NES	907.367	749.045	1139.89	922.531	-1.17545	-0.23321	0.00371292	0.047713	929.708	-2.90158
SMOC2	14.2815	31.2066	6.24282	17.5849	1.15899	0.212865	0.003711	0.047713	17.329	2.90174
SLC22A4	57.1601	54.9358	86.1072	75.0747	-1.25322	-0.325635	0.00371704	0.0477235	68.3194	-2.90123
RBM14-RBM4	31.046	15.8622	4.00047	22.0258	1.05017	0.0706281	0.00372725	0.0478121	18.2336	2.90037
REPS2	22.3079	24.6957	11.2362	9.45607	1.2261	0.294078	0.00373637	0.0478441	16.924	2.8996
STAG1	1424.99	1547.4	1541.8	1644.1	-1.0799	-0.110894	0.00373614	0.0478441	1539.57	-2.89962
DKK3	10673.9	10237.3	9652.11	9371.33	1.08423	0.116676	0.0037778	0.0483317	9983.65	2.89614
TNRC18	2384.91	2303.48	2122.23	2171.83	1.11443	0.15631	0.00383095	0.0489683	2245.61	2.89176
RFX2	245.825	252.263	294.374	287.498	-1.16434	-0.219511	0.00384136	0.049058	269.99	-2.8909
ZBTB47	1957.19	2027.48	1814.93	2063.4	1.06697	0.0935133	0.00386865	0.0493628	1965.75	2.88868
RRAS2	1524.53	1716.39	1386.33	1645.76	1.08547	0.118325	0.00387603	0.0494134	1568.25	2.88808
GPD2	518.923	479.571	581.895	540.683	-1.12057	-0.164229	0.00390359	0.0497209	530.268	-2.88585
RNF146	602.387	657.673	672.371	700.057	-1.10396	-0.14269	0.00391281	0.0497944	658.122	-2.88511
NDUFA4L2	139.549	142.238	108.158	134.96	1.21642	0.28264	0.00392129	0.0498145	131.226	2.88443
NHS	142.131	112.247	176.242	145.316	-1.18827	-0.248861	0.00392037	0.0498145	143.984	-2.8845
KIT	318.704	328.064	234.499	279.623	1.22233	0.289632	0.00393087	0.0498485	290.222	2.88366
PSMB3	436.826	453.823	485.484	447.286	-1.11478	-0.156764	0.00392767	0.0498485	455.855	-2.88391
CLCA2	48.2976	51.7617	66.3254	67.414	-1.23802	-0.308038	0.0039411	0.0499222	58.4497	-2.88284
RPL22L1	443.895	342.232	504.909	345.489	-1.13185	-0.178684	0.00394359	0.0499222	409.131	-2.88264

## Sheet: GSF-F_48h_2
up-regulated														down-regulated
	GSF.F_DHT_48h mean	GSF.F_DHT_72h mean	GSF.F_EtOH_48h mean	GSF.F_EtOH_72h mean	FoldChange	log2FoldChange	pvalue	padj	Overall mean	stat					GSF.F_DHT_48h mean	GSF.F_DHT_72h mean	GSF.F_EtOH_48h mean	GSF.F_EtOH_72h mean	FoldChange	log2FoldChange	pvalue	padj	Overall mean	stat
AOX1	2198.49	2356.67	983.524	962.964	2.13333	1.09311	5.16303e-103	7.45748e-99	1625.41	21.5512				LITAF	2613.28	2613.3	3262.52	3262.13	-1.24531	-0.316507	4.86693e-29	4.39362e-26	2937.81	-11.1843
FAM107A	386.643	470.761	59.1724	79.7724	3.98016	1.99283	2.00432e-87	1.44752e-83	249.087	19.8199				MFAP4	1536.29	1502.17	2405.09	2534.78	-1.50658	-0.591277	1.84946e-24	1.11307e-21	1994.58	-10.2068
SAMHD1	899.338	833.142	428.939	443.816	1.93557	0.952756	1.19806e-51	5.76824e-48	651.309	15.1199				PRELP	2929.43	3452.36	4549.9	5681.15	-1.51035	-0.594881	1.2121e-23	7.00303e-21	4153.21	-10.0226
PSMD8	1941.57	1952.45	1370.51	1467.18	1.39602	0.481317	2.825e-51	1.02011e-47	1682.93	15.0633				RHOJ	621.129	810.071	989.693	1310.04	-1.51766	-0.601848	1.3571e-23	7.53921e-21	932.732	-10.0115
APOD	1001.5	1246.56	316.031	352.076	2.50525	1.32495	5.5545e-51	1.60458e-47	729.043	15.0185				CD36	90.9401	127.811	222.034	322.866	-1.91626	-0.938292	4.10173e-22	2.04294e-19	190.913	-9.66854
SLC12A2	1302.94	1436.17	813.721	876.645	1.60132	0.679264	6.9497e-39	1.67302e-35	1107.37	13.0432				STC1	155.517	102.45	360.811	205.598	-1.89231	-0.920149	5.05659e-20	2.02882e-17	206.094	-9.1628
CAT	2388.96	2221.26	1444.11	1243.62	1.59619	0.674631	1.57746e-38	3.25498e-35	1824.49	12.9805				SOCS2	186.662	147.413	346.009	280.813	-1.69871	-0.764443	3.15558e-19	1.1777e-16	240.224	-8.96314
CERS6	750.648	895.315	357.541	388.172	1.92284	0.943239	3.80722e-38	6.87394e-35	597.919	12.9129				UACA	2511.42	2049.77	3153.17	2366.51	-1.26477	-0.338878	6.37938e-18	2.09418e-15	2520.22	-8.62553
SLC38A11	382.739	318.286	127.5	106.483	2.23597	1.1609	4.68724e-33	7.52249e-30	233.752	11.977				RGMB	2882.16	2823.82	4153.09	4124.56	-1.39009	-0.475179	8.82123e-18	2.83142e-15	3495.91	-8.58837
REV3L	3863.13	3868.27	2856.15	2793.27	1.36357	0.447391	6.22141e-33	8.9862e-30	3345.2	11.9535				DSEL	1634.78	1754.58	2025.88	2040.09	-1.24826	-0.319916	6.23712e-17	1.73248e-14	1863.83	-8.36065
ADAMTS1	7090.89	6720.91	4092.41	3677.72	1.65342	0.725454	7.58473e-32	9.95943e-29	5395.48	11.744				SNX18	1498.93	1576.52	1871.74	1945.02	-1.2266	-0.294667	3.89267e-16	1.00403e-13	1723.05	-8.14186
FAM105A	201.712	168.849	60.0178	42.5441	2.37857	1.25009	3.34139e-31	4.02192e-28	118.281	11.6179				MYO1D	1230.49	1317.25	1770.22	1909.14	-1.39707	-0.482403	3.6442e-15	8.2245e-13	1556.77	-7.8666
FKBP5	148.517	138.255	38.4695	32.6139	2.41856	1.27415	1.71683e-30	1.90753e-27	89.4639	11.4772				NR3C1	2239.85	2311.97	2676.2	2712.11	-1.18206	-0.241302	5.51989e-15	1.17249e-12	2485.03	-7.81446
IMPA2	494.033	551.845	196.74	199.655	2.03915	1.02797	2.36362e-30	2.43858e-27	360.568	11.4496				KIAA0922	236.408	195.932	393.078	339.687	-1.53885	-0.621854	7.4597e-15	1.56156e-12	291.276	-7.77643
IDH1	3659.44	3490.46	2848.52	2684.9	1.27561	0.351182	4.03352e-29	3.88401e-26	3170.83	11.201				SEPT11	13331.5	12609	15872.6	15473.2	-1.19375	-0.255499	4.69226e-14	8.80195e-12	14321.6	-7.54021
MYOCD	203.062	222.342	44.5982	31.0123	2.31112	1.20859	1.04981e-27	8.9197e-25	125.254	10.9085				SACS	1692.65	1560.75	2130.48	2152.82	-1.23892	-0.309084	1.66675e-12	2.73574e-10	1884.17	-7.05986
IRS2	2286.58	2254.2	1493.96	1547.01	1.50748	0.592141	3.36816e-27	2.60529e-24	1895.44	10.802				ATP13A3	3021.13	3260.37	3622.57	3862.2	-1.19233	-0.253789	3.2291e-12	4.98352e-10	3441.57	-6.96737
LINC00968	636.694	783.983	316.322	447.88	1.85087	0.888202	3.42706e-27	2.60529e-24	546.22	10.8004				DRAM1	2322.41	2422.53	3040.09	3398.78	-1.28125	-0.357551	3.24322e-12	4.98352e-10	2795.95	-6.96676
PTPLB	878.854	1019.69	546.387	624.554	1.53678	0.619914	5.52125e-27	3.98744e-24	767.373	10.7565				BACH1	1559.73	1508.04	2023.79	1928.69	-1.29059	-0.368025	5.93477e-12	8.92935e-10	1755.07	-6.88121
ABTB2	275.294	243.969	143.513	168.623	1.75761	0.813612	1.60904e-26	1.10671e-23	207.85	10.6575				L1CAM	187.171	185.974	284.33	289.666	-1.5628	-0.644135	1.00905e-11	1.50255e-09	236.785	-6.80521
NEXN	1588.04	1742.68	1059.76	1238.73	1.46111	0.547065	4.0982e-26	2.69065e-23	1407.3	10.5702				WLS	2050.41	2025.59	2481.22	2385.09	-1.20197	-0.265404	1.33317e-11	1.92563e-09	2235.58	-6.76499
ERCC6	1425.13	1673.1	937.9	1096.35	1.49313	0.578339	2.51635e-25	1.58027e-22	1283.12	10.3986				ELFN2	374.96	331.613	553.599	507.03	-1.40407	-0.48962	1.5972e-11	2.26176e-09	441.801	-6.73878
STEAP4	522.861	575.611	21.953	16.7914	1.46013	0.546094	4.84751e-23	2.59324e-20	284.304	9.88476				NPTX1	258.474	242.818	589.508	659.708	-1.6736	-0.742951	2.01844e-11	2.8033e-09	437.627	-6.70468
GCNT1	648.811	617.232	360.903	354.542	1.67966	0.748165	1.2332e-22	6.36155e-20	495.372	9.7908				NOV	1834.36	1926.46	2403.35	2623.36	-1.30369	-0.382602	2.05226e-11	2.82313e-09	2196.88	-6.70226
GLUL	5307.03	5171.03	3537.4	3295.9	1.42828	0.514279	5.69462e-22	2.74177e-19	4327.84	9.6349				IL6ST	10157.2	10604.3	11856	12507.3	-1.16658	-0.222288	4.18106e-11	5.54048e-09	11281.2	-6.59752
HSD11B1	83.525	128.484	14.2142	28.4573	2.02048	1.0147	2.8458e-21	1.32596e-18	63.6702	9.46825				BMPER	424.71	409.185	563.99	576.201	-1.32118	-0.401827	5.53649e-11	7.20442e-09	493.522	-6.55574
PHLDB1	3361.58	3353.63	2766.05	2766.52	1.21728	0.283658	4.84979e-21	2.18907e-18	3061.95	9.41239				SYNJ2	813.961	700.745	994.617	796.517	-1.21298	-0.278554	8.2427e-11	1.03528e-08	826.46	-6.4961
SMARCD2	985.553	911.786	761.507	702.841	1.29412	0.371973	7.12715e-21	3.11953e-18	840.422	9.37185				OSBPL3	1869.78	1787.79	2192.84	2012.28	-1.16583	-0.221362	1.07674e-10	1.32926e-08	1965.67	-6.45577
PDLIM1	1174.07	956.48	773.781	615.895	1.46878	0.554619	8.72006e-21	3.70449e-18	880.056	9.35054				MVP	3549.13	3234.96	3957.31	3625.67	-1.12436	-0.169106	1.56903e-10	1.84252e-08	3591.77	-6.39851
SULF1	9326.86	7341.7	6334.04	4273.03	1.49201	0.57726	1.34847e-20	5.56496e-18	6818.91	9.30432				DAB2	4253.85	4393.92	4920.49	4926.96	-1.16489	-0.220198	1.6466e-10	1.90268e-08	4623.81	-6.39113
ROR1	656.089	587.02	472.992	467.076	1.37362	0.457983	2.2895e-19	8.93771e-17	545.794	8.99844				IL1R1	1835.75	1888.85	2433.05	2555.62	-1.29703	-0.375207	1.6605e-10	1.90351e-08	2178.32	-6.38985
DKK1	13242.5	11720.5	9522.73	8157.43	1.36438	0.448243	3.17989e-19	1.1777e-16	10660.8	8.9623				SHROOM3	1254.88	1071.95	1651.55	1421.8	-1.28912	-0.366391	2.42195e-10	2.71183e-08	1350.04	-6.33188
NID1	5376.16	4759.07	3991.32	3319.43	1.3609	0.44456	4.15898e-19	1.50181e-16	4361.49	8.93266				SNTB1	396.445	407.352	565.163	584.669	-1.36755	-0.451599	2.56086e-10	2.82359e-08	488.407	-6.32327
DIO2	159.399	161.334	47.2557	38.6181	2.02015	1.01446	4.35997e-19	1.53598e-16	101.652	8.92744				POU2F2	227.986	243.47	329.193	356.602	-1.41522	-0.50103	3.48806e-10	3.70453e-08	289.313	-6.27537
CILP	447.324	623.853	218.092	274.65	1.73573	0.795544	2.61569e-18	8.99548e-16	390.98	8.72698				SUN1	2721.21	2903.48	3135.45	3001.59	-1.13657	-0.184683	4.28444e-10	4.42032e-08	2940.43	-6.2433
NID2	3324.57	2920.96	2302.57	2028.27	1.41574	0.501559	4.12324e-18	1.38502e-15	2644.09	8.67534				SBF2-AS1	313.484	293.034	450.831	396.513	-1.37605	-0.46053	6.85512e-10	6.92415e-08	363.465	-6.1694
NR2F1	560.051	552.207	349.355	303.297	1.52445	0.608292	9.89094e-18	3.10575e-15	441.228	8.57521				ZBTB2	472.354	420.282	594.603	498.856	-1.23126	-0.300137	9.80596e-10	9.76809e-08	496.524	-6.11254
IGFBP2	164.649	235.444	69.2276	86.5091	1.82918	0.871195	1.07989e-17	3.3187e-15	138.957	8.56509				IPO5	3817.97	3746.65	4419.67	4403.14	-1.15779	-0.211371	1.00147e-09	9.86318e-08	4096.85	-6.10918
DPY19L4	1674.74	1771.92	1273.38	1362.69	1.30515	0.384217	1.47598e-17	4.44146e-15	1520.68	8.52902				COLGALT2	56.8744	61.9023	118.62	107.452	-1.58774	-0.666975	1.2089e-09	1.1719e-07	86.2123	-6.07906
GALNT2	3989.04	3867.27	3229.02	3111.15	1.20992	0.274914	2.45464e-17	7.23569e-15	3549.12	8.46997				ADCY4	251.898	232.052	378.071	412.853	-1.38972	-0.474794	2.0047e-09	1.89254e-07	318.718	-5.99743
THBS1	85621.6	80296.8	61254	60173.8	1.36557	0.449508	2.57493e-17	7.43844e-15	71836.5	8.46439				PAPSS2	2256.41	2193.21	2618.55	2499.53	-1.15875	-0.212571	2.02544e-09	1.8997e-07	2391.92	-5.99575
ZHX3	2461.94	2386.01	2014.58	2005.62	1.217	0.283324	2.69876e-17	7.64331e-15	2217.04	8.45892				MAP2K3	857.771	800.431	1075.29	1059.42	-1.25818	-0.331342	2.18578e-09	2.03687e-07	948.229	-5.98336
MAOA	159.006	171.397	64.3598	77.118	1.82659	0.869154	1.5138e-16	4.12554e-14	117.97	8.25541				RCAN2	487.36	487.767	700.395	701.313	-1.33532	-0.417188	2.28798e-09	2.11844e-07	594.209	-5.97592
CTB-167B5.2	33.8687	63.0036	1.96019	1.57679	1.81626	0.860973	2.41359e-16	6.45591e-14	25.1023	8.19951				MAPRE2	552.484	504.477	745.525	664.856	-1.32254	-0.403309	2.60535e-09	2.39692e-07	616.836	-5.95471
TCN2	511.291	524.582	335.892	353.221	1.50817	0.592801	3.43484e-16	9.02052e-14	431.247	8.15699				UNC13B	697.486	811.752	849.191	978.59	-1.21546	-0.281504	4.69874e-09	4.11325e-07	834.254	-5.8575
CCDC68	88.6111	96.2733	17.2131	20.9674	1.89997	0.925973	4.10248e-16	1.03958e-13	55.7662	8.1355				MAP3K7CL	117.09	153.928	171.315	210.315	-1.39385	-0.479072	6.14104e-09	5.27983e-07	163.162	-5.81287
CD82	622.218	599.888	407.014	371.082	1.47092	0.556719	4.59818e-16	1.1451e-13	500.051	8.12167				BMP2K	588.919	643.951	744.209	854.213	-1.2327	-0.301824	8.30229e-09	7.05402e-07	707.823	-5.7622
GRIA1	416.667	540.684	257.875	343.817	1.56904	0.649878	9.85019e-16	2.41146e-13	389.761	8.02871				PKP4	699.503	844.706	899.055	1092.41	-1.261	-0.334563	9.48599e-09	8.01261e-07	883.919	-5.73967
ADCY3	1601.58	1701.18	1216.89	1201.19	1.29833	0.376661	1.46922e-15	3.5369e-13	1430.21	7.9795				SYNE3	300.218	298.72	408.138	358.361	-1.30975	-0.389286	9.70217e-09	8.13869e-07	341.359	-5.73585
HS6ST1	805.521	823.311	535.664	581.282	1.44415	0.530223	1.64278e-15	3.88989e-13	686.445	7.96571				HUNK	50.3267	52.093	104.725	101.445	-1.55593	-0.637781	1.31921e-08	1.08884e-06	77.1473	-5.68356
ENPP1	884.395	735.101	425.967	311.204	1.6593	0.730575	1.96168e-15	4.57009e-13	589.167	7.94374				DNM1	1097.03	935.578	1487.04	1244.39	-1.31658	-0.396796	1.35219e-08	1.10972e-06	1191.01	-5.67934
TMEM184C	929.372	950.083	697.921	711.048	1.31119	0.390874	2.47685e-15	5.67866e-13	822.106	7.91478				SLC1A3	65.1426	115.091	109.163	163.923	-1.47029	-0.556098	1.40317e-08	1.14239e-06	113.33	-5.673
LMO4	725.056	670.143	536.477	510.739	1.31953	0.400027	4.44403e-15	9.87533e-13	610.604	7.84172				PTPN13	2985.88	2979.79	3395.72	3363.34	-1.12752	-0.173157	1.56999e-08	1.26687e-06	3181.18	-5.65373
SORBS1	104.332	128.829	42.4675	42.1856	1.7949	0.843905	4.68993e-15	1.02638e-12	79.4536	7.83496				ATP8B1	1530.49	1589.39	1784.53	1830.03	-1.17034	-0.226925	1.74887e-08	1.39561e-06	1683.61	-5.63517
SQRDL	1126.29	1124.36	758.794	782.596	1.45064	0.536685	5.13438e-15	1.10688e-12	948.011	7.82358				TMEM158	222.009	186.025	344.631	319.299	-1.41298	-0.498736	1.84744e-08	1.45024e-06	267.991	-5.62571
NISCH	2932.99	2745.07	2335.61	2235.69	1.24638	0.317749	8.08362e-15	1.668e-12	2562.34	7.76626				PKIG	763.829	683.566	956.621	882.384	-1.24745	-0.318984	1.89051e-08	1.47602e-06	821.6	-5.62173
CRISPLD2	167.448	125.536	76.9052	61.5544	1.74929	0.806769	9.28383e-15	1.88867e-12	107.861	7.7487				ATG14	529.048	551.554	706.174	624.165	-1.28245	-0.358902	2.17346e-08	1.65311e-06	602.735	-5.5976
S1PR1	152.875	146.464	69.795	68.5041	1.75398	0.810635	1.01133e-14	2.02883e-12	109.41	7.73782				CSDC2	310.76	222.487	469.992	367.836	-1.39435	-0.479597	2.1567e-08	1.65311e-06	342.769	-5.59894
CHST2	527.188	523.313	336.665	347.932	1.4563	0.542307	1.2366e-14	2.44677e-12	433.775	7.71221				NREP	962.695	832.75	1353.02	1182.36	-1.31403	-0.394002	2.27468e-08	1.72018e-06	1082.71	-5.5897
TMEM109	1630.52	1851.34	1261.64	1532.79	1.27314	0.348391	1.76268e-14	3.44056e-12	1569.07	7.66685				STK17A	787.914	788.177	965.932	936.284	-1.22689	-0.295008	2.7353e-08	2.05774e-06	869.577	-5.55759
TENM3	578.504	571.255	340.192	336.876	1.57351	0.653984	2.90298e-14	5.59075e-12	456.707	7.60257				EPB41L2	2867.88	2747.76	3406	3276.61	-1.1594	-0.213377	2.78112e-08	2.08137e-06	3074.56	-5.55469
FBN2	8634.81	8997.43	6468.88	7066.68	1.36183	0.445548	3.26216e-14	6.19983e-12	7791.95	7.58747				GRB10	708.81	682.658	866.274	815.328	-1.21478	-0.280693	2.86005e-08	2.12941e-06	768.267	-5.5498
DAPK1	581.364	673.678	397.04	495.378	1.47501	0.560727	5.67911e-14	1.03834e-11	536.865	7.51528				MMP1	1743.82	973.955	3548.64	2405.75	-1.53391	-0.617213	3.50524e-08	2.58315e-06	2168.04	-5.51412
RASL11A	73.7897	53.1242	27.129	20.636	1.83931	0.879168	5.66856e-14	1.03834e-11	43.6697	7.51552				MXRA5	3087.71	2957.87	4150.29	4251.24	-1.28335	-0.35991	3.71184e-08	2.72151e-06	3611.78	-5.50404
SAV1	1114.18	1014.46	894.921	820.77	1.23126	0.30014	1.87395e-13	3.38341e-11	961.081	7.35749				NLRP1	999.383	957.174	1218.16	1144.64	-1.20067	-0.263845	4.39897e-08	3.1929e-06	1079.84	-5.47404
KCNIP3	326.285	336.185	214.184	242.333	1.45323	0.539261	2.59147e-13	4.62114e-11	279.747	7.31408				ATP2B4	8537.28	8233.98	9909.08	9928.47	-1.15561	-0.208658	5.92112e-08	4.25496e-06	9152.2	-5.42117
PPP3CA	1241.14	1156.06	967.761	947.286	1.25951	0.332862	2.6918e-13	4.7415e-11	1078.06	7.30898				CA12	520.587	534.276	681.102	677.925	-1.28571	-0.362567	6.09186e-08	4.33452e-06	603.472	-5.41608
PRCP	2645.99	2684.23	2025.1	1929.77	1.28564	0.362488	5.39002e-13	9.37993e-11	2321.27	7.21509				CEP170	1922.02	1835.59	2317.18	2140.32	-1.20032	-0.263424	6.30216e-08	4.44041e-06	2053.78	-5.41001
CREB3L2	2277.22	2176.6	1872.67	1915.88	1.20784	0.272432	5.99063e-13	1.0301e-10	2060.59	7.2007				DUSP4	51.3898	50.6928	91.1409	97.5915	-1.4784	-0.564035	9.43803e-08	6.43033e-06	72.7037	-5.33722
ATP1A2	71.2631	75.556	21.0212	25.0234	1.74474	0.803013	7.74239e-13	1.31566e-10	48.2159	7.16564				FGF13	68.3296	64.6359	119.338	106.652	-1.47197	-0.557747	9.70834e-08	6.58344e-06	89.7388	-5.3321
LGMN	1824.75	1726.95	1426.4	1399.2	1.25582	0.328627	8.88454e-13	1.49219e-10	1594.33	7.14677				EREG	155.638	156.091	226.4	229.176	-1.39834	-0.483716	9.84715e-08	6.5948e-06	191.826	-5.32952
F10	1457.81	1671.26	1034.76	1114.3	1.39003	0.475111	1.14369e-12	1.89879e-10	1319.53	7.11201				LAMB1	7033.74	5148.69	8528.72	6614.07	-1.21468	-0.28058	1.10492e-07	7.32083e-06	6831.31	-5.30857
KIF26B	405.433	354.222	190.53	157.56	1.64535	0.718395	1.76599e-12	2.86607e-10	276.936	7.05181				CPM	52.6591	51.9262	116.886	110.178	-1.52129	-0.605296	1.48241e-07	9.51643e-06	82.9121	-5.25473
MT2A	1469.25	946.715	898.086	548.861	1.48127	0.56683	2.10556e-12	3.37918e-10	965.728	7.02731				LIPA	4918.66	4298.21	5662.08	4641.57	-1.1522	-0.204389	1.80148e-07	1.14125e-05	4880.13	-5.21874
XYLT1	1011.39	903.837	786.695	736.009	1.26071	0.334241	2.98692e-12	4.741e-10	859.484	6.97834				ENTPD7	180.703	190.466	253.342	261.838	-1.34022	-0.422469	2.31509e-07	1.41692e-05	221.587	-5.17207
IRAK3	528.642	513.673	382.373	374.59	1.34862	0.431484	3.03519e-12	4.76525e-10	449.82	6.97609				GPSM2	673.478	659.778	834.132	803.82	-1.23854	-0.308644	2.34202e-07	1.42135e-05	742.802	-5.16991
NPR3	382.872	475.617	180.154	217.448	1.65248	0.724636	3.48414e-12	5.29736e-10	314.023	6.95667				ANKRD13A	2587.05	2304.67	2978.96	2624.42	-1.15042	-0.202166	2.44103e-07	1.47524e-05	2623.77	-5.16217
CNN3	2979.57	2925.88	2395.12	2414.86	1.21956	0.286359	1.02051e-11	1.5041e-09	2678.86	6.80358				TRAK1	1507.67	1504.56	1788.99	1728.77	-1.17741	-0.235619	2.46582e-07	1.48401e-05	1632.5	-5.16028
ZFHX3	848.943	903.936	655.013	771.354	1.27665	0.352368	1.14704e-11	1.67353e-09	794.811	6.78673				PAM	9065.2	8779.93	10328.6	10221.1	-1.15178	-0.203865	2.48419e-07	1.48886e-05	9598.71	-5.15889
PSD4	253.897	211.439	151.685	142.632	1.51887	0.602998	1.40441e-11	2.00844e-09	189.913	6.75745				SCN8A	828.03	925.507	978.74	1027.33	-1.17341	-0.230707	2.49639e-07	1.48999e-05	939.903	-5.15797
CDKL1	166.815	149.986	103.942	103.569	1.51711	0.601321	1.6289e-11	2.28425e-09	131.078	6.73593				SOCS2-AS1	21.8669	20.2749	49.0837	37.9317	-1.49234	-0.577575	2.84242e-07	1.68262e-05	32.2893	-5.13361
NRP2	502.088	556.182	365.87	397.033	1.36474	0.448623	2.16257e-11	2.94681e-09	455.293	6.6946				MAP3K5	139.059	127.203	201.923	181.657	-1.36804	-0.45211	3.68668e-07	2.12153e-05	162.461	-5.08446
CD302	682.551	804.914	533.313	606.574	1.28016	0.356319	2.72419e-11	3.6774e-09	656.838	6.66076				ARHGAP17	1105.21	952.959	1279.94	1176.04	-1.15516	-0.208092	3.78384e-07	2.16533e-05	1128.54	-5.07952
PPAP2B	7842.95	9689.29	5981.49	7224.37	1.33144	0.412986	3.73573e-11	4.99619e-09	7684.52	6.6142				ARID5A	458.741	497.765	626.814	693.401	-1.30953	-0.389047	3.95089e-07	2.24672e-05	569.18	-5.07131
TMEM64	408.091	376.086	264.5	270.277	1.44691	0.532972	4.94272e-11	6.49024e-09	329.739	6.57265				FGF5	773.008	679.304	1033.29	839.526	-1.28353	-0.360114	4.06929e-07	2.30497e-05	831.281	-5.06569
PKDCC	179.488	183.862	99.1446	103.24	1.584	0.663574	6.92041e-11	8.92486e-09	141.434	6.52237				EML1	1267.74	1148.12	1487.55	1271.3	-1.17411	-0.231573	4.26486e-07	2.39695e-05	1293.68	-5.05674
TBC1D16	2052.36	1899.48	1715.32	1656.06	1.19143	0.252689	7.27222e-11	9.29557e-09	1830.81	6.51493				CNTN3	290.324	236.919	391.174	341.426	-1.29892	-0.377307	5.44164e-07	3.01146e-05	314.961	-5.01005
CDC37L1	312.727	323.084	216.071	212.751	1.39001	0.475096	7.43819e-11	9.42432e-09	266.158	6.51154				RAB3B	3123.79	2639.25	3784.42	3388.79	-1.19284	-0.254398	5.63297e-07	3.10544e-05	3234.06	-5.00339
STIM1	1531.96	1450.84	1211.23	1200.31	1.26183	0.335515	1.0466e-10	1.3032e-08	1348.59	6.46006				WDR26	2264.33	2232.92	2548.56	2518.02	-1.12476	-0.169614	5.86044e-07	3.20637e-05	2390.96	-4.99576
ATP1A1	5631.43	5504.55	4625.23	4597.36	1.19669	0.259051	1.12759e-10	1.38025e-08	5089.64	6.44877				MLTK	2252.25	2130.76	2640.56	2543.85	-1.16352	-0.218492	6.35944e-07	3.44029e-05	2391.85	-4.97997
NT5DC2	1564.71	1293.21	1199.49	1050.87	1.2813	0.35761	1.21983e-10	1.48061e-08	1277.07	6.43684				PRPS1	341.092	312.606	454.139	420.471	-1.28951	-0.366825	6.35939e-07	3.44029e-05	382.077	-4.97997
EEF2K	750.45	684.449	548.403	483.314	1.34822	0.431058	1.32518e-10	1.59508e-08	616.654	6.42425				USP53	4489.24	5424.42	5424.56	6556.02	-1.2126	-0.278109	7.04746e-07	3.75622e-05	5473.56	-4.96005
PDZRN3	1799.32	1770.78	1306.25	1297.97	1.34112	0.423436	1.47076e-10	1.75567e-08	1543.58	6.40838				KRT19	2426.9	2028.31	2989.19	2285.34	-1.23993	-0.31026	7.13275e-07	3.7877e-05	2432.43	-4.95771
THRB	423.196	427.89	285.693	334.787	1.39737	0.482717	1.55721e-10	1.84252e-08	367.891	6.39966				LRRC32	842.465	821.591	1000.2	1070.82	-1.19527	-0.257338	7.39651e-07	3.91338e-05	933.77	-4.95065
ITGA4	1413.51	1372.68	1018.28	1051.84	1.33287	0.414531	1.61793e-10	1.88462e-08	1214.08	6.39382				SVIL	3602.81	3788	4243.45	4484.27	-1.17098	-0.227722	7.51895e-07	3.96364e-05	4029.63	-4.94746
SEC14L2	205.266	167.701	117.558	100.027	1.51385	0.598222	1.8776e-10	2.13543e-08	147.638	6.37103				NCS1	1081.95	1082.52	1218.03	1271.95	-1.13738	-0.18572	7.79074e-07	4.09198e-05	1163.61	-4.94054
ABCA8	316.407	528.723	189.817	260.935	1.52159	0.605582	2.03576e-10	2.29722e-08	323.97	6.35862				RAPGEF6	616.094	556.178	762.496	712.967	-1.19182	-0.25317	8.49215e-07	4.42818e-05	661.933	-4.9237
ANXA2	27190.8	23883.4	24198.4	21716.8	1.10668	0.146235	2.51152e-10	2.79049e-08	24247.3	6.32627				MYO10	1112.32	944.487	1428.78	1217.65	-1.26471	-0.338812	9.19675e-07	4.74421e-05	1175.81	-4.90809
FAM20B	3854.4	4256.14	3150.78	3528.89	1.22139	0.288525	2.58992e-10	2.834e-08	3697.55	6.32153				ABHD17C	228.724	222.621	309.529	287.693	-1.29043	-0.367853	9.92751e-07	5.10295e-05	262.142	-4.89307
ASPN	247.372	163.497	110.623	55.2545	1.6601	0.731274	2.6235e-10	2.838e-08	144.187	6.31954				EPB41L3	1161.14	1075.67	1391.65	1308.03	-1.20426	-0.268143	1.01762e-06	5.19381e-05	1234.12	-4.8882
PDIA5	800.756	775.641	631.491	604.741	1.25639	0.329283	2.63287e-10	2.838e-08	703.157	6.31898				TMEM200A	583.433	520.519	733.659	695.737	-1.2653	-0.339482	1.10164e-06	5.60285e-05	633.337	-4.87256
COL5A2	13051.7	10890.3	11227.5	9459.5	1.18854	0.249193	2.88091e-10	3.08236e-08	11157.3	6.30506				TRIM2	1838.11	1872.31	2153.55	2231.83	-1.1672	-0.223052	1.22275e-06	6.1112e-05	2023.95	-4.85192
COL3A1	62796.9	44450.4	45216.3	33154.3	1.38048	0.465173	3.72025e-10	3.92228e-08	46404.5	6.26533				CXCL12	3993	3371.92	4909.5	3752.19	-1.19445	-0.256342	1.37741e-06	6.81344e-05	4006.65	-4.82825
SIX2	425.352	480.707	265.128	338.669	1.46868	0.554519	3.98292e-10	4.16879e-08	377.464	6.2547				AKAP12	11613	10144.1	14044.1	12547.5	-1.16265	-0.217418	1.51376e-06	7.46239e-05	12087.2	-4.80941
RNF24	1584.88	1499.68	1181.42	1163.5	1.2961	0.374179	4.25072e-10	4.41708e-08	1357.37	6.24453				GNPTAB	901.596	1030.47	1074.91	1204.87	-1.17766	-0.235924	1.55246e-06	7.60125e-05	1052.96	-4.80436
GLRX	1313.24	1196.12	956.342	898.699	1.30236	0.38113	4.82117e-10	4.93879e-08	1091.1	6.22482				ADAMTS14	154.98	168.479	218.083	217.877	-1.31488	-0.394936	1.67149e-06	8.15643e-05	189.855	-4.78956
ABCA6	460.379	449.34	295.188	267.874	1.45349	0.539521	5.97895e-10	6.08169e-08	368.195	6.19098				LRRC2	233.042	333.366	345.904	434.169	-1.34286	-0.425312	1.71268e-06	8.24598e-05	336.62	-4.78467
ADRA1B	60.0239	54.649	27.5835	30.7499	1.61947	0.695526	7.65134e-10	7.67472e-08	43.2516	6.152				MRPS6	813.054	933.412	979.234	1077.93	-1.19139	-0.252651	1.76341e-06	8.46202e-05	950.906	-4.7788
LTBP1	5121.11	4292.41	3894.99	3053.43	1.27131	0.346313	1.0038e-09	9.86318e-08	4090.48	6.1088				TNFRSF21	293.328	274.653	362.279	334.807	-1.24182	-0.312458	2.02156e-06	9.63675e-05	316.267	-4.75126
NTN4	2729.27	3484.63	2131.75	2580.13	1.23345	0.302695	1.06399e-09	1.03839e-07	2731.44	6.0995				AKAP2	3285.05	3223.92	3763.97	3690.17	-1.15436	-0.207087	2.06467e-06	9.77771e-05	3490.78	-4.74699
STON1	1204.64	1194.8	813.443	817.641	1.39709	0.482426	1.23669e-09	1.19085e-07	1007.63	6.07541				FAM171B	537.375	513.979	678.132	603.346	-1.22388	-0.291464	2.32481e-06	0.00010938	583.208	-4.72292
FRAS1	364.647	378.517	239.717	281.466	1.40272	0.488226	1.35047e-09	1.2918e-07	316.087	6.06127				SERPINB6	1851.07	1597.33	2146.29	1766.58	-1.1402	-0.189288	2.36701e-06	0.000111004	1840.32	-4.71926
OXTR	921.867	881.169	686.259	607.234	1.36952	0.453665	1.88551e-09	1.79173e-07	774.132	6.00738				GPR176	2896.12	2879.68	3127.57	3084.82	-1.10411	-0.14288	2.62707e-06	0.000121231	2997.05	-4.69801
DNAJB4	1041.32	1141.2	798.612	819.681	1.27844	0.354381	2.73267e-09	2.49814e-07	950.204	5.9469				KLF3	1529.01	1738.2	1796.42	1870.85	-1.13552	-0.183357	2.62384e-06	0.000121231	1733.62	-4.69826
LIN7A	273.621	276.656	162.539	184.375	1.48671	0.572126	3.03305e-09	2.75531e-07	224.298	5.9298				TMEM87B	1105.66	1136.55	1264.16	1221.1	-1.14602	-0.196636	2.79707e-06	0.000128257	1181.87	-4.68519
TFPI	2036.43	2163.86	1815.29	1948.32	1.13635	0.18441	3.42886e-09	3.0954e-07	1990.97	5.90963				DDX3X	3547.94	3816.58	3907.87	4066.12	-1.09738	-0.134057	2.8073e-06	0.000128318	3834.63	-4.68444
ITGB3	940.558	994.215	721.063	738.473	1.28384	0.360467	3.47966e-09	3.12176e-07	848.577	5.9072				DIEXF	470.28	476.416	569.516	560.535	-1.19462	-0.256552	2.98497e-06	0.000135581	519.187	-4.67185
FAM198B	1521.14	1903.68	948.828	1270.84	1.45951	0.545485	4.27458e-09	3.81123e-07	1411.12	5.8732				CFL2	1704.46	1657.75	1902.22	1700.65	-1.11775	-0.160597	3.5176e-06	0.000157301	1741.27	-4.63802
MYLK	5843.25	4619.28	4889.21	4101.15	1.22199	0.28923	4.38801e-09	3.88837e-07	4863.22	5.86886				WNT2	2384.77	2805.56	3170.4	3578.85	-1.2457	-0.316955	3.96292e-06	0.000173456	2984.89	-4.61332
SUN2	1806.25	1845.15	1479.05	1551.27	1.20722	0.271687	4.51011e-09	3.97219e-07	1670.43	5.86431				PDE5A	1494.05	1365.46	1879.34	1555.42	-1.21418	-0.279978	4.06586e-06	0.000177424	1573.57	-4.60799
MBNL2	921.025	889.606	699.465	710.929	1.27809	0.353995	5.37314e-09	4.67528e-07	805.256	5.83518				CLMP	1786.32	1749.07	2110.88	2036.58	-1.18223	-0.241511	4.10765e-06	0.000177638	1920.71	-4.60586
STK24	2072.57	1943.7	1630.27	1453.82	1.25137	0.323506	6.0699e-09	5.24992e-07	1775.09	5.81482				CTNNAL1	721.592	644.584	839.594	735.504	-1.16857	-0.224742	4.10126e-06	0.000177638	735.319	-4.60618
RGS2	320.787	249.299	179.282	116.01	1.51049	0.59502	6.26256e-09	5.35245e-07	216.344	5.80959				SMAD3	2610.18	2347.14	2967.83	2536.27	-1.13312	-0.180297	4.09641e-06	0.000177638	2615.35	-4.60643
PLEKHA5	749.548	733.289	580.424	578.079	1.28036	0.356547	9.74795e-09	8.13869e-07	660.335	5.73506				FZD7	1164.79	1024.66	1408.75	1316.01	-1.17691	-0.235007	4.17708e-06	0.000179032	1228.55	-4.60237
STC2	7539.35	8294.72	5941.69	6669.09	1.248	0.319619	1.2628e-08	1.04827e-06	7111.21	5.69102				TNFRSF19	568	510.17	714.226	677.925	-1.22787	-0.296152	4.1678e-06	0.000179032	617.58	-4.60283
KIAA1377	317.651	297.678	228.496	242.937	1.35296	0.436122	1.40783e-08	1.14239e-06	271.691	5.67243				SAMD4A	1376.87	1520.04	1542.65	1777.87	-1.12831	-0.174168	4.28034e-06	0.000182375	1554.36	-4.59728
TNS3	1325.39	1302.81	961.357	1003.96	1.29972	0.378202	1.6416e-08	1.3173e-06	1148.38	5.64607				CSRP2	200.64	192.497	286.193	282.085	-1.31593	-0.396084	4.37706e-06	0.000185796	240.354	-4.59262
RGCC	494.954	451.966	214	195.172	1.5597	0.641272	1.7801e-08	1.41273e-06	339.023	5.63212				MAP4K4	5847.1	5418.55	6761.33	6035.55	-1.15683	-0.210171	4.38635e-06	0.000185796	6015.63	-4.59218
RPS6KA2	3444.42	3585.38	2838.26	2899.85	1.21332	0.278957	1.79486e-08	1.41666e-06	3191.97	5.63069				CNIH3	71.802	55.2167	118.394	96.7679	-1.41511	-0.500914	4.68821e-06	0.00019685	85.5451	-4.57828
TRAK2	1941.83	1970.33	1615.42	1717.67	1.18751	0.247934	1.9187e-08	1.48999e-06	1811.31	5.61918				SLC4A7	745.437	708.044	912.693	800.861	-1.20266	-0.266233	4.95408e-06	0.000207411	791.759	-4.56672
ADAMTS2	1995.99	1663.11	1714.08	1465.14	1.16615	0.221749	1.93687e-08	1.49605e-06	1709.58	5.61755				FOLR3	20.0687	26.3851	47.0014	53.2779	-1.4139	-0.499678	5.0684e-06	0.000210921	36.6833	-4.56194
YEATS2	1016.65	1093.98	826.52	924.045	1.22294	0.29035	2.17455e-08	1.65311e-06	965.299	5.59751				DOCK1	2253.95	2241.75	2514.08	2533.59	-1.10627	-0.145705	5.4117e-06	0.000222064	2385.84	-4.54816
ZDHHC9	1375.56	1291.01	1077.91	1079.72	1.22751	0.295736	2.97018e-08	2.20006e-06	1206.05	5.54319				ACAD11	772.405	875.224	909.556	918.893	-1.16727	-0.223143	5.4357e-06	0.000222417	869.019	-4.54723
DCLK1	545.809	508.64	402.145	362.258	1.35329	0.436473	4.0684e-08	2.96788e-06	454.713	5.48786				SERPINB7	125.885	74.2927	187.302	126.508	-1.39798	-0.483346	5.99625e-06	0.00024335	128.497	-4.52652
TRAM2	4622.83	3944.96	4148.92	3811.52	1.11279	0.154178	5.1134e-08	3.6929e-06	4132.06	5.44732				ITPKB	217.981	238.31	293.154	323.459	-1.2852	-0.361993	6.0329e-06	0.000244087	268.226	-4.52523
HPS5	576.628	644.168	414.996	472.857	1.29923	0.377653	5.9788e-08	4.27514e-06	527.163	5.41943				BAALC	248.623	177.881	375.565	291.08	-1.37241	-0.456707	6.30438e-06	0.000254359	273.287	-4.51592
COL8A1	1323.87	1199.36	981.975	803.407	1.2834	0.359967	6.21407e-08	4.3998e-06	1077.15	5.41253				CNST	426.283	408.52	539.296	510.427	-1.24257	-0.313332	6.45643e-06	0.000259768	471.131	-4.51086
ITGA5	6360.83	5851.29	5507.34	5114.59	1.13469	0.182303	6.63054e-08	4.6491e-06	5708.51	5.40091				LY96	83.66	81.9483	127.369	144.428	-1.36343	-0.447242	6.6285e-06	0.00026595	109.351	-4.50528
FGD4	570.013	614.897	452.676	490.906	1.26006	0.333493	7.65926e-08	5.34446e-06	532.123	5.37498				JAK1	3347.58	3038.72	3741.8	3469.76	-1.10426	-0.143078	6.81293e-06	0.000272593	3399.46	-4.49945
SORT1	673.619	779.667	507.044	574.259	1.29016	0.367555	8.33184e-08	5.76395e-06	633.647	5.35979				KIF23	199.142	160.376	259.222	229.437	-1.26632	-0.340638	6.92355e-06	0.000275492	212.044	-4.49603
TOX	258.704	222.115	175.305	170.176	1.38384	0.468677	8.34024e-08	5.76395e-06	206.575	5.35961				KANK1	1175.02	1321.72	1345.04	1480.07	-1.12917	-0.175268	7.17683e-06	0.000284006	1330.46	-4.48838
NEGR1	1059.97	1478.96	860.536	1180.36	1.23275	0.301878	8.4341e-08	5.80105e-06	1144.95	5.35759				RND3	5998.9	5636.71	7120.1	6741.76	-1.17734	-0.23553	7.39944e-06	0.000291219	6374.37	-4.48186
MPZL1	2648.15	2680.27	2205.61	2273.62	1.18158	0.240722	8.75183e-08	5.99106e-06	2451.91	5.3509				LPPR4	126.483	160.258	192.87	242.223	-1.34109	-0.42341	7.6582e-06	0.000300584	180.459	-4.47452
MMP19	563.542	485.968	448.149	398.196	1.25103	0.323115	9.86207e-08	6.5948e-06	473.964	5.32925				NTRK2	79.0482	99.9085	140.582	177.191	-1.40565	-0.491241	7.92857e-06	0.00030785	124.182	-4.4671
PLTP	1100.49	1199.42	923.438	1024.97	1.19528	0.25735	9.84134e-08	6.5948e-06	1062.08	5.32963				BZW2	577.812	523.391	708.604	621.421	-1.20161	-0.264968	8.27217e-06	0.000318622	607.807	-4.45802
TACC1	2051.28	2115.16	1606.69	1628.15	1.24708	0.318553	1.05529e-07	7.02426e-06	1850.32	5.31694				MAMLD1	515.732	594.73	710.847	850.04	-1.26302	-0.336874	8.6522e-06	0.000329742	667.837	-4.44838
MOXD1	8529.91	7243.84	7384.7	6611.9	1.14131	0.190686	1.14909e-07	7.57871e-06	7442.59	5.30142				TP53I11	749.762	758.782	914.631	973.144	-1.1941	-0.25592	8.73219e-06	0.000331915	849.08	-4.4464
PRICKLE2	639.644	588.043	484.066	446.62	1.27842	0.354366	1.21138e-07	7.95325e-06	539.593	5.29177				PLAU	1033.98	791.178	1302.37	1108.53	-1.24189	-0.312534	9.50267e-06	0.000360253	1059.01	-4.42819
ACKR3	443.027	486.074	303.073	332.891	1.39857	0.483952	1.21707e-07	7.95448e-06	391.266	5.29091				CASP1	139.337	156.99	191.821	212.743	-1.30383	-0.382761	9.57437e-06	0.000362021	175.223	-4.42657
CHRM2	967.213	843.608	749.231	742.228	1.31092	0.390582	1.22856e-07	7.99341e-06	825.57	5.28919				AP2M1	5415.74	5093.75	5866.51	5639.05	-1.09124	-0.125968	9.67607e-06	0.000364912	5503.76	-4.42429
NEBL	64.3908	57.1221	14.8047	11.5766	1.55122	0.633403	1.25134e-07	8.1051e-06	36.9735	5.28583				NRG1	109.465	122.226	145.248	155.715	-1.31368	-0.393609	9.87541e-06	0.000371459	133.164	-4.41988
ENTPD4	1408.38	1452.39	1205.36	1208.18	1.15308	0.205488	1.39487e-07	8.99439e-06	1318.58	5.26592				ACSL4	1244.98	1272.7	1405.79	1357.98	-1.13363	-0.18095	9.93298e-06	0.000372654	1320.36	-4.41863
ELL2	2733.45	2917.33	2110.47	2362.58	1.24039	0.310799	1.54756e-07	9.8907e-06	2530.96	5.24681				FEM1C	568.001	537.675	676.174	646.977	-1.1844	-0.244159	1.00814e-05	0.000377244	607.207	-4.41542
LEPREL1	160.2	182.603	97.2877	96.6746	1.44583	0.531899	1.66811e-07	1.06142e-05	134.191	5.23297				MALL	178.205	141.711	240.915	178.958	-1.28064	-0.356862	1.03037e-05	0.000382588	184.947	-4.4107
CHST10	198.262	233.002	129.455	165.889	1.39091	0.476024	1.84118e-07	1.15974e-05	181.652	5.2147				TBC1D8	503.649	426.475	638.995	561.521	-1.25034	-0.322319	1.07658e-05	0.000398722	532.66	-4.40119
SFT2D2	984.833	906.623	819.283	779.69	1.19891	0.261728	1.84672e-07	1.15974e-05	872.607	5.21414				ASB5	171.299	233.717	213.18	279.744	-1.31661	-0.396825	1.1005e-05	0.000406163	224.485	-4.39642
FLNB	2712.96	2933.71	2105.52	2174.07	1.24978	0.321678	1.87604e-07	1.17305e-05	2481.57	5.21122				SYNC	1410.07	1318.24	1595.89	1498.18	-1.12832	-0.174181	1.1023e-05	0.000406163	1455.59	-4.39607
COL4A1	3038.18	2611.19	2598.1	2299.2	1.16491	0.220224	1.90743e-07	1.18754e-05	2636.67	5.20814				TCF7	394.239	271.315	517.959	385.616	-1.27618	-0.351836	1.12713e-05	0.000412159	392.282	-4.39123
ITGB5	4180.2	4269.35	3620.63	3563.5	1.15557	0.208601	2.17025e-07	1.34537e-05	3908.42	5.18413				BMP2	43.9825	55.5809	74.5108	82.3749	-1.38984	-0.47492	1.24175e-05	0.000449518	64.1123	-4.37013
REEP6	66.1808	52.6559	25.3844	22.5297	1.5124	0.596843	2.19443e-07	1.35455e-05	41.6877	5.18206				CLIP4	1230.99	1237.24	1404.63	1351.88	-1.13618	-0.184193	1.27195e-05	0.000458158	1306.19	-4.36487
OMD	177.752	244.624	108.859	113.426	1.46165	0.547601	2.27861e-07	1.40052e-05	161.165	5.17504				LUM	19868.1	21638.2	24138	26156.5	-1.1648	-0.220088	1.29038e-05	0.00046326	22950.2	-4.36173
NIPAL3	2461.12	2454.46	1975.46	2041.58	1.23184	0.300815	2.33667e-07	1.42135e-05	2233.15	5.17034				MARCH4	1074.9	1065.14	1290.95	1409.02	-1.20169	-0.265062	1.29888e-05	0.000464382	1210	-4.36029
CALD1	20348.9	19643.7	17981.7	18610.2	1.12227	0.16642	2.83622e-07	1.68262e-05	19146.1	5.13402				CDH11	2607.9	2379.24	3027.7	2817.61	-1.1511	-0.203015	1.31564e-05	0.000469211	2708.11	-4.35749
KCNB1	263.291	383.858	157.359	252.944	1.42619	0.512171	2.92497e-07	1.72442e-05	264.363	5.12822				TMEM173	751.518	724.614	954.756	942.708	-1.23548	-0.305068	1.36088e-05	0.000482962	843.399	-4.35008
PTN	1547.12	1681.49	1211.41	1101.91	1.25835	0.331536	3.02435e-07	1.77576e-05	1385.48	5.12192				GREM2	597.45	575.912	749.71	689.742	-1.25616	-0.329024	1.42463e-05	0.000504348	653.204	-4.34003
MYADM	4478.06	4146.49	3830.75	3781.66	1.15882	0.21266	3.0648e-07	1.79222e-05	4059.24	5.11942				ANO4	186.037	176.465	246.52	212.939	-1.28556	-0.362396	1.46948e-05	0.000515168	205.49	-4.33321
SNED1	919.073	713.471	718.479	551.277	1.2587	0.331934	3.25905e-07	1.89814e-05	725.575	5.10782				IRF2BP2	954.345	988.086	1082.43	1121.98	-1.12804	-0.173818	1.47303e-05	0.000515168	1036.71	-4.33268
OGN	496.234	393.471	374.113	264.651	1.40355	0.489081	3.27384e-07	1.89909e-05	382.117	5.10696				ST7	367.777	424.79	491.893	510.253	-1.25117	-0.323283	1.48138e-05	0.000516836	448.678	-4.33144
LRCH2	311.041	332.956	224.858	218.529	1.32691	0.408071	3.30909e-07	1.91186e-05	271.846	5.10493				GRIK2	418.101	395.48	504.391	488.658	-1.20239	-0.265907	1.66303e-05	0.000574494	451.657	-4.30591
COL7A1	2907.65	2594.1	2428.54	2026.2	1.18126	0.240329	3.79277e-07	2.16533e-05	2489.12	5.07907				HK2	313.843	355.665	407.058	448.255	-1.24868	-0.320401	1.67855e-05	0.000577262	381.205	-4.30385
NRP1	3992.45	3518.84	3273.03	2840.83	1.20146	0.264786	4.21853e-07	2.38017e-05	3406.29	5.05882				SEMA3D	1179.4	1460.39	1518.91	1849.21	-1.23285	-0.301992	1.68545e-05	0.000578259	1501.98	-4.30294
MBNL1	3533.48	3566.39	3190.22	3223.72	1.10719	0.146903	4.42091e-07	2.47502e-05	3378.45	5.04988				IGFBP4	18477.2	18755.6	21102.2	23459.3	-1.14544	-0.195901	1.73024e-05	0.000592219	20448.6	-4.29713
AFAP1L1	234.721	290.522	160.828	192.43	1.37398	0.458364	4.44611e-07	2.47952e-05	219.625	5.04879				C10orf105	25.61	23.9616	55.5111	39.5058	-1.4325	-0.518533	1.80005e-05	0.000614655	36.1471	-4.28835
EOGT	573.82	618.562	459.788	507.131	1.21804	0.284565	4.65185e-07	2.58428e-05	539.825	5.04014				DACT3	130.231	113.42	173.901	147.818	-1.27677	-0.352501	1.82545e-05	0.000619737	141.343	-4.28524
ENTPD6	953.89	961.746	804.441	808.316	1.16198	0.216582	5.75379e-07	3.15999e-05	882.098	4.9993				ZNF618	405.042	409.91	491.39	475.447	-1.18696	-0.247276	1.8278e-05	0.000619737	445.447	-4.28495
NOTCH3	2387.71	2339.38	1997.61	2039.66	1.18985	0.250778	6.26169e-07	3.41297e-05	2191.09	4.98297				DPYSL3	3199.92	3250.2	3737.04	3881.92	-1.14624	-0.196909	1.92462e-05	0.000649515	3517.27	-4.27346
FIBIN	167.47	152.976	104.12	103.315	1.40717	0.492802	6.42472e-07	3.45009e-05	131.97	4.97799				ENC1	153.358	147.289	222.37	239.113	-1.33042	-0.411881	2.02794e-05	0.000679619	190.532	-4.26179
SCAP	969.011	980.11	832.244	922.483	1.1575	0.211015	6.42532e-07	3.45009e-05	925.962	4.97797				SLC16A2	976.972	862.06	1158.14	1075.19	-1.17614	-0.234057	2.09939e-05	0.000701935	1018.09	-4.25405
SLC1A5	4022.08	4340.39	3217.52	3479.28	1.19926	0.262149	6.96122e-07	3.72399e-05	3764.82	4.96244				CAB39	1189.9	1173.87	1341.94	1218.95	-1.13038	-0.17681	2.1351e-05	0.000712225	1231.16	-4.25027
RP11-597D13.9	167.192	174.276	114.517	127.733	1.35929	0.442852	8.36269e-07	4.37648e-05	145.929	4.92671				ZNF589	300.924	358.043	392.291	441.799	-1.23862	-0.308732	2.17527e-05	0.000723955	373.264	-4.2461
PTGS1	5032.45	4186.08	3945.62	3170.21	1.2165	0.282731	8.72941e-07	4.53553e-05	4083.59	4.91831				WDFY1	1261.61	1315.03	1460.7	1412.92	-1.1423	-0.191944	2.366e-05	0.000782025	1362.57	-4.22722
DSP	1148.02	1117.61	931.963	921.706	1.18461	0.244411	9.18952e-07	4.74421e-05	1029.82	4.90824				XPC	1352.05	1258.14	1559.5	1394.79	-1.14954	-0.201061	2.52186e-05	0.000827857	1391.12	-4.21283
ERRFI1	953.504	888.467	745.018	658.384	1.2447	0.315803	9.97443e-07	5.10889e-05	811.343	4.89214				DNAJA1	1474.09	1749.02	1647.67	1879.45	-1.11713	-0.159802	2.58968e-05	0.000848194	1687.56	-4.20684
ITPK1	1273.14	1250.08	1069.07	1099.89	1.18592	0.246006	1.17433e-06	5.95156e-05	1173.04	4.85992				PLEKHG1	216.251	224.021	277.549	246.206	-1.25077	-0.322821	2.77567e-05	0.000902967	241.007	-4.19113
TCF12	1953.71	1875.94	1607.52	1627.87	1.18674	0.247009	1.1848e-06	5.98365e-05	1766.26	4.85816				SLC25A46	988.095	996.916	1131.6	1095.55	-1.13322	-0.180433	2.85324e-05	0.000924039	1053.04	-4.18487
CCDC85A	52.1175	42.9399	19.8522	24.6954	1.47087	0.556672	1.1905e-06	5.99149e-05	34.9012	4.85721				MTURN	666.42	692.219	767.687	792.874	-1.14108	-0.190404	2.86083e-05	0.000924425	729.8	-4.18427
RABGAP1	1638.2	1819.31	1400.43	1551.15	1.17304	0.230248	1.19542e-06	5.99534e-05	1602.27	4.8564				PTEN	1813.89	1601.72	2082.23	1868	-1.13843	-0.187048	2.87881e-05	0.000927044	1841.46	-4.18285
UBASH3B	517.92	546.027	400.737	483.943	1.23567	0.305291	1.23804e-06	6.1663e-05	487.157	4.84945				NFASC	1815.73	1541.55	2132.81	2018.46	-1.15953	-0.21354	3.02498e-05	0.000970371	1877.14	-4.17158
LZTS3	349.296	338.83	260.027	305.702	1.29729	0.375503	1.25619e-06	6.23521e-05	313.464	4.84656				HERC4	1366.89	1408.39	1569	1557.16	-1.13929	-0.18814	3.2322e-05	0.00102832	1475.36	-4.15646
PRSS23	7372.59	7168.1	6006.75	5653.89	1.20536	0.269468	1.52833e-06	7.50856e-05	6550.33	4.8075				DNAJC13	2373.87	2554.4	2644.48	2885.92	-1.10635	-0.145811	3.27681e-05	0.00103794	2614.67	-4.15332
DHRS3	154.451	103.878	100.06	81.4953	1.41299	0.498749	1.6921e-06	8.22921e-05	109.971	4.7871				YWHAZ	7765.33	7653.62	8460.82	8134.46	-1.08851	-0.122352	3.32084e-05	0.0010473	8003.56	-4.15027
ZNF469	833.602	755.66	661.663	668.506	1.22393	0.291519	1.6995e-06	8.23742e-05	729.858	4.78622				SHQ1	180.038	200.591	232.397	237.818	-1.25068	-0.322716	3.46305e-05	0.00108977	212.711	-4.14066
PRPS2	335.878	336.602	261.786	275.138	1.25722	0.330236	1.71124e-06	8.24598e-05	302.351	4.78484				AMOTL1	1810.52	1833.46	2113.46	2187.16	-1.15272	-0.205041	3.47583e-05	0.00109141	1986.15	-4.13982
PCDH18	7581.92	7010.2	6755.82	6268.54	1.13791	0.186391	1.87106e-06	8.94887e-05	6904.12	4.76687				PIK3R2	1511.98	1567.22	1671.68	1764.19	-1.10526	-0.14438	3.58082e-05	0.00111951	1628.77	-4.13298
WNT5A	6184.63	6377.41	4830.04	5199.24	1.22914	0.297646	2.03512e-06	9.66952e-05	5647.83	4.7499				NFATC4	3451.42	3619.01	4104.02	4307.53	-1.16731	-0.223186	3.61338e-05	0.00112725	3870.5	-4.1309
TMEM237	800.654	833.482	665.25	688.261	1.19372	0.255466	2.13455e-06	0.000100757	746.912	4.74025				ARL4C	584.958	612.087	711.439	808.264	-1.16462	-0.219858	3.69171e-05	0.0011492	679.187	-4.12597
COL12A1	21113.7	23264.2	15786.2	18271.6	1.29063	0.368072	2.43088e-06	0.00011363	19608.9	4.71384				PLCB1	518.622	519.678	620.72	614.229	-1.18016	-0.238987	3.7117e-05	0.00115294	568.312	-4.12473
PDGFD	376.255	671.84	240.374	337.162	1.37953	0.464177	2.46949e-06	0.000115062	406.408	4.71063				YPEL5	1494.21	1502.57	1682.25	1575.12	-1.12144	-0.165354	3.97772e-05	0.00122243	1563.54	-4.10877
HLX	123.332	143.713	77.5776	93.2938	1.38729	0.472269	2.62076e-06	0.000121231	109.479	4.6985				NEK7	2502.52	2870.39	2822.22	3181.21	-1.13185	-0.178684	4.06366e-05	0.00124355	2844.09	-4.10383
CTSC	3434.18	3402.61	2659.9	2467.97	1.22447	0.29216	2.7663e-06	0.00012725	2991.17	4.68745				ZFAND5	3131.87	3126.7	3588.94	3476.44	-1.13553	-0.18337	4.40943e-05	0.00133802	3330.99	-4.08491
RBPJ	2224.16	2299.08	1948.4	2029.05	1.13894	0.187686	2.9537e-06	0.000134584	2125.17	4.67401				TIMP3	17716.1	15053.2	21071.2	17929.1	-1.1772	-0.235365	4.52831e-05	0.00137121	17942.4	-4.07873
GALNT15	601.091	646.824	382.377	424.56	1.38836	0.473384	3.05502e-06	0.000138328	513.713	4.66709				SCP2	1644.59	1637.13	1818.23	1748	-1.10172	-0.139753	4.63426e-05	0.00139453	1711.99	-4.07335
LAMA2	2545.5	2793.98	1821.67	2030.09	1.33179	0.413367	3.07189e-06	0.000138658	2297.81	4.66595				NDFIP2	1050.63	1108.33	1238.44	1278.17	-1.18716	-0.247511	4.70797e-05	0.00141277	1168.89	-4.06967
RBBP8	334.315	389.305	253.314	268.557	1.27379	0.349123	3.13283e-06	0.000140968	311.373	4.66191				SNX30	632.273	566.209	736.659	678.625	-1.15068	-0.202482	4.8289e-05	0.00144109	653.441	-4.06376
MAML2	902.727	820.876	767.115	736.742	1.16582	0.221344	3.18834e-06	0.00014302	806.865	4.6583				PKM	19443.8	16939.1	20905.1	18674.8	-1.10312	-0.141593	5.02822e-05	0.0014944	18990.7	-4.05431
LAMC1	24593.3	23874.1	21495.4	20883.9	1.13488	0.182541	3.59248e-06	0.000160154	22711.7	4.63367				PSD3	1027.17	1003.39	1236.58	1136.63	-1.18805	-0.248599	5.10248e-05	0.00151335	1100.94	-4.05088
VCL	11663.5	11598.1	10371.4	10412.7	1.11629	0.158715	3.66212e-06	0.000162756	11011.4	4.62969				VSTM4	1348.26	1394.62	1606.24	1589.14	-1.18171	-0.240873	5.28115e-05	0.00155042	1484.57	-4.04282
PEMT	255.883	264.108	184.676	182.625	1.29843	0.376773	3.74717e-06	0.000166025	221.823	4.62493				ACKR4	1329.21	1879.87	1873.89	2439.02	-1.3001	-0.378618	5.30316e-05	0.00155373	1880.5	-4.04185
OR7E47P	22.6983	28.3734	6.64644	7.43503	1.36494	0.448838	3.7762e-06	0.000166799	16.2883	4.62333				FMNL3	334.484	316.635	404.092	358.266	-1.19425	-0.256101	5.65757e-05	0.00163763	353.369	-4.02666
TMEM45A	646.337	644.119	528.978	547.785	1.20085	0.264057	3.86471e-06	0.000169728	591.805	4.61853				RAB30	390.62	409.531	474.286	485.788	-1.19047	-0.251533	6.15417e-05	0.00176721	440.056	-4.00682
ZNF219	668.516	863.68	483.449	722.863	1.31435	0.394344	3.866e-06	0.000169728	684.627	4.61846				LPXN	407.479	349.642	537.249	436.513	-1.25028	-0.322257	6.24956e-05	0.00178862	432.721	-4.00318
SGCD	1564	1767.23	1250.7	1442.44	1.23056	0.299319	4.16786e-06	0.000179032	1506.09	4.60283				SH3BGRL3	8806.11	7584.77	9880.17	9323.36	-1.13555	-0.183387	6.25348e-05	0.00178862	8898.61	-4.00304
TCEAL4	1665.7	1583.24	1412.88	1349.48	1.17091	0.227626	4.25102e-06	0.000181662	1502.83	4.59872				FTH1	47083	49621.7	50503.2	52502.4	-1.08373	-0.116003	6.29195e-05	0.00179252	49927.6	-4.00159
PAPSS1	1232.25	1175.69	1081.74	1021.94	1.13091	0.177479	4.44034e-06	0.000187533	1127.91	4.58963				NYNRIN	2106.67	2106.41	2506.4	2590.68	-1.17356	-0.23089	6.44588e-05	0.00182916	2327.54	-3.99586
SLC35A3	458.862	531.334	371.459	416.2	1.21284	0.278395	4.65578e-06	0.000196059	444.464	4.57973				SLC7A14	671.775	507.564	874.676	788.992	-1.26739	-0.341865	6.43599e-05	0.00182916	710.752	-3.99623
HIGD1A	1012.13	1031.13	853.184	898.193	1.16852	0.224679	5.07148e-06	0.000210921	948.658	4.56181				SDCBP	3336.95	3341.89	3711.58	3768.05	-1.1112	-0.152116	6.62092e-05	0.00187515	3539.62	-3.98951
SLC25A1	1748.16	1547.96	1480.45	1477.78	1.15545	0.208457	5.08173e-06	0.000210921	1563.58	4.56139				SLC6A6	819.569	797.591	966.135	923.712	-1.15376	-0.206345	6.67177e-05	0.00188585	876.752	-3.9877
NUMBL	1793.66	1704.28	1538.21	1557.35	1.17353	0.230859	5.1696e-06	0.000213953	1648.38	4.55778				GTF2I	4058.87	4119.15	4439.79	4310.32	-1.08901	-0.123011	6.68535e-05	0.001886	4232.03	-3.98721
MTHFD2	2059.07	1966.09	1665.31	1585.91	1.22057	0.287553	5.34069e-06	0.000219775	1819.09	4.55094				HK1	2049.4	2071.92	2283.36	2293.15	-1.11664	-0.159158	6.80221e-05	0.00191201	2174.46	-3.9831
WNT5B	1543.27	1376.64	1281.59	1229.27	1.15905	0.212938	5.3357e-06	0.000219775	1357.69	4.55114				SOX9	94.7861	86.5638	138.021	105.495	-1.32841	-0.409696	6.80403e-05	0.00191201	106.217	-3.98304
ECM2	605.911	667.342	524.05	500.743	1.25216	0.324421	5.94379e-06	0.00024252	574.512	4.52838				PIP4K2A	897.104	818.759	1032.06	928.404	-1.14601	-0.196614	6.91905e-05	0.00194056	919.082	-3.97905
MRC2	13449.2	12026.1	11796.7	10241.6	1.13843	0.187047	5.99782e-06	0.00024335	11878.4	4.52647				WWTR1	1888.26	1746.54	2122.17	1925.75	-1.1248	-0.169665	6.98153e-05	0.00195429	1920.68	-3.97691
TNPO1	5328.75	5706.75	4756.88	5047.61	1.11419	0.15599	6.88087e-06	0.000274551	5210	4.49734				FABP3	4875.89	5145.19	5885.65	6509.72	-1.1912	-0.252421	7.33024e-05	0.00203612	5604.11	-3.9653
GAS1	923.651	941.089	711.917	731.373	1.24807	0.319697	7.17494e-06	0.000284006	827.008	4.48843				PALLD	5573.77	5904.76	6198.44	6605.94	-1.10739	-0.147159	7.42135e-05	0.00205352	6070.73	-3.96236
APRT	629.78	637.598	493.421	476.143	1.22988	0.298521	7.23407e-06	0.000285489	559.236	4.48668				SLC9A7	206.552	206.827	257.866	258.302	-1.23714	-0.307007	7.4583e-05	0.00205647	232.387	-3.96117
CEBPD	273.337	251.69	188.054	199.295	1.34089	0.423194	7.75521e-06	0.000303567	228.094	4.47183				OPTN	3384.68	3339.33	3679.06	3639.42	-1.08506	-0.117771	7.58272e-05	0.00208619	3510.62	-3.95722
MFAP2	1284.49	1223.67	1145.12	1131.61	1.13815	0.186687	7.79405e-06	0.000304263	1196.22	4.47076				SLC2A1	674.652	816.678	767.942	953.19	-1.15159	-0.203631	7.64875e-05	0.00209637	803.116	-3.95515
ADPRH	106.764	107.404	68.893	69.8271	1.37672	0.461234	7.82918e-06	0.000304811	88.2222	4.4698				COPS6	1291.84	1189.07	1438.07	1232.2	-1.12319	-0.1676	8.83836e-05	0.00239079	1287.79	-3.92045
TYRO3	530.195	568.116	420.664	434.426	1.22427	0.291924	8.08624e-06	0.00031313	488.35	4.46289				LARP6	1127.95	1057.72	1326.14	1248.6	-1.17343	-0.230728	8.98004e-05	0.00241541	1190.11	-3.91662
NR2F2	2612.38	2376.62	2250.91	2110.52	1.14397	0.19405	8.22143e-06	0.000317514	2337.61	4.45934				LAYN	1886.94	1844.89	2041.64	1969.66	-1.0962	-0.132507	9.07161e-05	0.00243551	1935.78	-3.91417
FSTL1	35371.7	36432.8	30599.5	30854.2	1.15768	0.211233	8.3378e-06	0.000320296	33314.6	4.45632				GLCE	425.771	419.917	507.223	497.908	-1.17257	-0.229676	9.42428e-05	0.00252082	462.705	-3.90496
MFSD6	722.391	696.421	594.843	568.635	1.21375	0.279475	8.42826e-06	0.000322912	645.573	4.45401				NTM	462.442	485.23	542.095	536.908	-1.18597	-0.246072	0.000100431	0.00264712	506.669	-3.88955
PPL	2628.84	2550.49	2303.17	2322.65	1.19499	0.256993	8.51682e-06	0.000325442	2451.29	4.45176				FLRT3	154.158	212.295	193.917	233.678	-1.24163	-0.31223	0.000100868	0.00265382	198.512	-3.88849
ACPL2	231.174	231.151	139.757	170.148	1.39026	0.475352	1.01712e-05	0.000379621	193.058	4.4135				ENPP2	3158.57	2661.53	3676.6	3277.8	-1.17153	-0.228398	0.000107139	0.00280855	3193.63	-3.87383
LOX	34990.2	36409	29683.5	29924.9	1.16265	0.217422	1.02115e-05	0.000380143	32751.9	4.41265				SRSF10	1035.76	1062.29	1151.03	1142.14	-1.10301	-0.141445	0.000108506	0.00283924	1097.8	-3.87074
LTBP4	2509.3	3035.76	1913.84	2263.31	1.28143	0.357752	1.12467e-05	0.000412159	2430.55	4.3917				OMG	14.0624	18.6208	29.079	31.4674	-1.31992	-0.400456	0.000108709	0.0028394	23.3074	-3.87028
PAK4	420.821	398.585	331.818	351.798	1.20981	0.274782	1.12337e-05	0.000412159	375.755	4.39195				CD34	105.913	138.208	154.154	154.728	-1.32729	-0.408482	0.00010948	0.0028452	138.251	-3.86856
SLC1A4	487.395	518.449	376.193	408.969	1.22452	0.292212	1.14067e-05	0.000416056	447.751	4.38863				HFE	391.003	412.872	467.493	470.041	-1.18423	-0.243953	0.000109598	0.0028452	435.352	-3.8683
TSC22D3	804.227	933.743	641.189	727.953	1.23958	0.309851	1.22258e-05	0.000444811	776.778	4.37352				IFFO1	1212.12	1276.07	1371.29	1347.89	-1.12337	-0.167828	0.000109719	0.0028452	1301.84	-3.86803
ZDHHC8	1323.7	1291.83	1088.26	1172.13	1.19154	0.252822	1.24055e-05	0.000449518	1218.98	4.37034				KRT33B	10.1996	14.9577	22.7065	24.1106	-1.34134	-0.423677	0.000110346	0.00285124	17.9936	-3.86664
ACTG2	286.366	372.649	141.248	175.312	1.40192	0.487402	1.27089e-05	0.000458158	243.894	4.36506				RAB31	1448.04	1455.18	1727.01	1806.39	-1.15358	-0.206117	0.000110159	0.00285124	1609.16	-3.86705
ITPR1	142.986	159.084	95.1277	97.8004	1.35633	0.43971	1.29254e-05	0.00046326	123.75	4.36136				SPHKAP	14.9314	14.3037	33.532	26.8846	-1.34214	-0.424531	0.00011541	0.00297675	22.4129	-3.85568
SSB	1163.05	1202.52	1017.61	1006.31	1.1324	0.179388	1.33874e-05	0.000476275	1097.37	4.35368				SPOCD1	435.09	305.111	540.721	388.327	-1.22333	-0.290813	0.000124014	0.00317599	417.312	-3.83805
FNDC3A	2161.95	2161.14	1903.8	1975.33	1.13434	0.181858	1.43521e-05	0.000506852	2050.56	4.3384				LDB2	469.934	444.838	575.836	510.39	-1.20941	-0.274297	0.000127963	0.00327132	500.25	-3.83035
METTL7A	440.176	442.476	344.672	290.581	1.24813	0.319769	1.45212e-05	0.000511572	379.476	4.33583				TACC2	308.914	314.716	380.242	371.73	-1.20044	-0.263558	0.000134656	0.00343028	343.9	-3.81778
CLTB	1138.52	1149.21	934.95	1073.86	1.17472	0.232317	1.46357e-05	0.000514351	1074.13	4.3341				C1orf198	1928	2125.45	2253.39	2525	-1.15639	-0.209623	0.000140215	0.00355935	2207.96	-3.80779
AZI2	1063.52	1013.69	937.969	894.259	1.13279	0.179884	1.6025e-05	0.000557749	977.361	4.31411				TSC22D1	1300.76	1301.62	1458.17	1481.07	-1.11588	-0.15818	0.000145303	0.00365637	1385.41	-3.79896
FN1	401254	393147	344655	328292	1.17451	0.232057	1.61684e-05	0.000561384	366837	4.31214				ZSCAN30	381.323	379.745	454.284	407.063	-1.17606	-0.233957	0.000144579	0.00365637	405.604	-3.8002
SH3RF3	316.534	334.362	245.951	238.7	1.24761	0.319169	1.66653e-05	0.000574494	283.887	4.30544				ZNF521	758.499	720.521	865.009	828.124	-1.15681	-0.210146	0.000153904	0.00382645	793.039	-3.78468
ST6GALNAC3	24.9184	24.654	8.43802	11.4657	1.37817	0.462751	1.65979e-05	0.000574494	17.369	4.30634				RASA2	600.751	620.866	696.875	684.334	-1.14691	-0.197747	0.00015451	0.00383461	650.706	-3.78371
PPP1R12A	1509	1548.3	1337.01	1390.37	1.12714	0.172669	1.81839e-05	0.000619453	1446.17	4.2861				PTPRK	1513.4	1439.29	1675.86	1627.42	-1.10966	-0.15012	0.000159442	0.00395021	1563.99	-3.77588
KLF15	163.336	184.344	114.683	129.916	1.33008	0.411508	1.89939e-05	0.0006425	148.07	4.2764				ESM1	22.7052	22.0616	41.5681	32.6903	-1.35171	-0.434782	0.000164936	0.00407935	29.7563	-3.76743
THOC2	1037.78	1024.5	900.492	914.625	1.1506	0.202385	1.94858e-05	0.000656066	969.349	4.2707				ACPP	11.7264	10.3364	32.2563	32.9973	-1.30835	-0.387747	0.000167471	0.00412791	21.8291	-3.76362
PTK2B	205.263	226.12	150.45	133.306	1.29347	0.371247	1.95385e-05	0.000656311	178.785	4.2701				SERPINB2	783.955	1022.42	1046.83	1363.59	-1.27743	-0.353241	0.000167444	0.00412791	1054.2	-3.76366
ANTXR1	7803.81	9474.23	6685.45	8512.95	1.15664	0.209936	2.27112e-05	0.000754118	8119.11	4.23642				BLVRA	328.081	292.842	394.069	312.609	-1.18024	-0.239081	0.000179224	0.00439509	331.9	-3.74663
SMPDL3A	604.587	677.013	527.369	593.974	1.17591	0.23378	2.36296e-05	0.000782025	600.736	4.22751				TMEM123	2217.74	2479.03	2426.18	2664.91	-1.0876	-0.121151	0.000179928	0.00440488	2446.97	-3.74565
CHST3	1237.32	1330.72	1049.48	1092.14	1.18029	0.239143	2.39397e-05	0.000789464	1177.42	4.22457				TTL	1079.71	1146.18	1189.92	1262.96	-1.09957	-0.136941	0.000180392	0.00440878	1169.69	-3.745
GPM6B	318.774	280.746	202.713	151.14	1.35995	0.443555	2.50841e-05	0.000825319	238.343	4.21404				RGS4	50.9845	42.2743	83.5211	70.3751	-1.36727	-0.451297	0.000182755	0.00445146	61.7887	-3.74173
AC026703.1	106.588	131.821	42.7859	49.4192	1.3879	0.472905	2.67962e-05	0.000875666	82.6536	4.19911				LDOC1L	828.693	816.988	924.921	877.199	-1.11734	-0.160066	0.000183694	0.00446679	861.95	-3.74045
PACSIN2	856.615	818.229	731.654	736.798	1.14991	0.201525	2.69174e-05	0.000877642	785.824	4.19809				ARHGAP42	46.0189	61.2078	71.3641	77.2704	-1.3201	-0.400651	0.00018585	0.00451162	63.9653	-3.73751
ITGB4	34.6642	21.0382	15.3451	13.1401	1.40843	0.49409	2.79608e-05	0.000907563	21.0469	4.18947				AKR1C2	439.989	532.076	540.702	659.878	-1.1903	-0.251321	0.000189468	0.00457638	543.161	-3.73266
ALCAM	3166.62	3223.24	2715.09	2764.21	1.16131	0.215752	2.88177e-05	0.000927044	2967.29	4.18261				LACC1	617.761	665.328	811.275	938.643	-1.25779	-0.33089	0.000189347	0.00457638	758.252	-3.73282
IGFBP7	4090.54	3789.42	3621.06	3557.69	1.14621	0.196875	3.0327e-05	0.000970371	3764.68	4.171				TMEM35	143.484	111.667	210.881	171.499	-1.31784	-0.398176	0.000191988	0.0046295	159.383	-3.72933
LRP10	7924.05	8284.39	7143.33	7840.83	1.09511	0.131075	3.03661e-05	0.000970371	7798.15	4.1707				EXT1	3839.62	3641.67	4234.04	4124.01	-1.1078	-0.147693	0.000192721	0.00463943	3959.83	-3.72837
APBB2	882.723	817.192	736.271	726.368	1.18077	0.239726	3.14111e-05	0.00100155	790.638	4.16299				SATB2	101.361	111.42	136.647	125.806	-1.27327	-0.348534	0.000197763	0.00474229	118.808	-3.72186
ABLIM1	511.618	490.129	401.333	390.84	1.23287	0.302015	3.25691e-05	0.00103391	448.48	4.15472				VGLL4	728.76	761.428	861.259	864.895	-1.16077	-0.215086	0.000197979	0.00474229	804.085	-3.72158
NAGS	42.5544	39.6152	22.1235	19.9295	1.39484	0.480102	3.29775e-05	0.00104229	31.0556	4.15187				HMGB3	194.292	185.897	238.863	203.481	-1.21626	-0.282452	0.000201085	0.00480077	205.633	-3.71765
DFNA5	1049.14	1123.12	900.794	952.299	1.14825	0.199433	3.54422e-05	0.00111047	1006.34	4.13535				BDKRB1	44.1483	35.5886	72.0482	53.8956	-1.34943	-0.432352	0.000205334	0.00489413	51.4202	-3.71236
CREB5	827.912	976.774	717.924	928.082	1.20708	0.271517	3.77296e-05	0.00116945	862.673	4.12096				SELENBP1	558.192	463.202	681.619	584.465	-1.17653	-0.234542	0.000205674	0.00489416	571.869	-3.71194
RHOB	1766.01	1795.52	1419.96	1567.37	1.20708	0.271527	3.8016e-05	0.00117581	1637.22	4.11922				PCDHGC3	2374.7	2583.66	2743.99	2997.15	-1.15498	-0.207864	0.000215747	0.00511698	2674.88	-3.69983
SURF4	4036.02	3992.95	3715.54	3783.15	1.06977	0.097307	3.81787e-05	0.00117832	3881.91	4.11823				VWF	61.4077	51.2197	93.8512	88.7181	-1.32049	-0.401074	0.00021655	0.00512761	73.7992	-3.69888
GCNT4	341.425	365.521	272.891	296.775	1.23429	0.30368	3.93917e-05	0.00121316	319.153	4.11102				NUP133	569.821	604.708	652.696	619.925	-1.13191	-0.178765	0.000222408	0.00524912	611.788	-3.6921
FLOT1	2402.89	2190.01	2132.62	2101.23	1.11924	0.162518	4.01782e-05	0.00123213	2206.69	4.10645				TPBG	1703.08	1723.86	1928.72	2111.06	-1.12821	-0.174039	0.00023115	0.00542884	1866.68	-3.68229
CYP1B1	5302.77	6777.78	4301.73	5232.92	1.23829	0.308353	4.35643e-05	0.00132752	5403.8	4.08772				TRIM8	1931.96	2014.04	2135.98	2294.02	-1.10949	-0.149891	0.000231631	0.0054313	2094	-3.68176
MFSD10	1053.3	980.273	846.831	930.874	1.21267	0.278188	4.35457e-05	0.00132752	952.82	4.08781				SCFD2	364.691	362.019	430.769	410.866	-1.18146	-0.240569	0.00023556	0.00550555	392.086	-3.67747
PDE1A	231.28	221.206	171.583	155.067	1.29951	0.377966	4.38786e-05	0.00133428	194.784	4.08605				SYT7	87.6713	79.7361	130.365	115.309	-1.31687	-0.397108	0.000236284	0.00551355	103.27	-3.67669
ZDHHC3	1903.97	1947.1	1722.5	1746.19	1.10444	0.143309	4.56885e-05	0.0013806	1829.94	4.07665				ZHX2	612.917	650.908	722.668	746.451	-1.14713	-0.19803	0.000238247	0.00555039	683.236	-3.67457
DTNA	192.525	203.97	130.344	145.426	1.32998	0.4114	4.61564e-05	0.00139182	168.066	4.07428				TP53INP2	693.937	642.515	791.478	766.199	-1.14658	-0.197334	0.000240489	0.0055846	723.532	-3.67218
HECTD4	1113.23	1152.59	968.876	1099.87	1.1476	0.198615	4.71444e-05	0.00141277	1083.64	4.06935				FUT8	611.84	629.382	716.726	737.073	-1.15285	-0.205205	0.000245105	0.00568105	673.755	-3.66732
FOXO1	159.795	195.676	117.546	132.435	1.29723	0.375434	4.81111e-05	0.00143875	151.363	4.06462				PTDSS1	1302.33	1351.1	1536.81	1687.52	-1.15055	-0.202323	0.000245429	0.00568105	1469.44	-3.66698
RP11-395B7.7	616.255	662.547	535.962	577.474	1.145	0.195348	4.9921e-05	0.00148672	598.06	4.056				MMP27	15.2773	18.7552	30.4328	35.0388	-1.30209	-0.38083	0.000245991	0.00568494	24.8761	-3.6664
KIAA0368	2205.71	2083.18	1984.54	1909.35	1.11224	0.153474	5.11929e-05	0.00151523	2045.7	4.05011				ZFPM2	275.397	305.952	328.481	344.735	-1.18475	-0.244578	0.000261947	0.00603434	313.641	-3.65029
CLPTM1	1667.32	1751.14	1490.33	1660.89	1.10576	0.145039	5.13286e-05	0.00151614	1642.42	4.04949				ANK1	327.902	279.807	413.905	390.878	-1.21747	-0.283889	0.000265603	0.00609915	353.123	-3.64673
MANSC1	321.968	339.46	259.119	268.663	1.21498	0.280937	5.15384e-05	0.00151923	297.302	4.04854				C11orf96	36.0248	46.477	63.579	70.3859	-1.33472	-0.416537	0.000268004	0.00613478	54.1167	-3.64441
ETNK2	114.675	108.596	76.8613	62.5115	1.34208	0.424474	5.24468e-05	0.00154285	90.661	4.04445				DSTYK	1061.86	998.853	1209.53	1148.71	-1.12613	-0.171371	0.000269654	0.00615437	1104.74	-3.64283
ARL6IP5	3411.16	3532.42	3074.34	3080.79	1.10004	0.137553	5.33004e-05	0.00155844	3274.68	4.04066				KIAA0196	1271.02	1298.02	1397.89	1379.2	-1.094	-0.129616	0.000269712	0.00615437	1336.53	-3.64278
AC002398.9	62.2657	53.5528	35.9875	65.7263	1.36175	0.445457	5.40882e-05	0.00157828	54.3831	4.03722				PNRC2	768.487	931.295	882.447	984.96	-1.13775	-0.18618	0.0002771	0.00631298	891.797	-3.63582
GFPT1	2048.68	1994.91	1743.72	1728.79	1.15428	0.206988	5.5289e-05	0.00161007	1879.03	4.03206				HSPH1	883.83	1050.62	978.822	1133.25	-1.11067	-0.151427	0.000277758	0.006318	1011.63	-3.63521
SEMA3E	28.0727	35.3735	13.7001	18.3178	1.36298	0.44676	5.59804e-05	0.00162692	23.866	4.02914				FAM110B	126.526	132.953	164.132	168.618	-1.23229	-0.301343	0.000283037	0.00640781	148.057	-3.63035
STRADB	563.515	575.974	460.242	466.712	1.19699	0.259414	5.62622e-05	0.00163183	516.611	4.02796				PLCB3	796.741	880.587	921.076	995.533	-1.13917	-0.187989	0.000284578	0.00642258	898.484	-3.62895
NIN	1209.42	1042.11	1070.51	950.777	1.12888	0.174896	5.73774e-05	0.00165752	1068.2	4.02334				SESN3	683.404	661.986	839.782	828.556	-1.21869	-0.285336	0.000284184	0.00642258	753.432	-3.62931
MUC1	200.013	194.853	150.564	148.198	1.27374	0.349072	5.80468e-05	0.00167351	173.407	4.02061				ZNF281	802.545	719.09	974.003	880.054	-1.19073	-0.251846	0.000285168	0.00642585	843.923	-3.62841
LRCH1	335.243	315.649	279.805	279.93	1.19288	0.254455	6.01878e-05	0.00173178	302.657	4.01207				DNAJB5	183.891	194.799	237.842	251.794	-1.23593	-0.305596	0.000287949	0.0064784	217.082	-3.62591
PRKAG2	266.212	277.207	211.329	202.251	1.22295	0.290361	6.27296e-05	0.00179065	239.25	4.0023				NLGN1	384.523	399.816	472.705	499.36	-1.1945	-0.256412	0.000289498	0.00650313	439.101	-3.62452
BAIAP2	512.503	446.327	417.539	369.245	1.19606	0.258294	7.00978e-05	0.00195655	436.403	3.97595				ANKMY2	469.207	431.98	545.972	476.937	-1.14427	-0.194432	0.00029867	0.00669796	481.024	-3.61645
SGMS2	1509.97	1580.28	1286.22	1323.53	1.16296	0.217807	7.01669e-05	0.00195655	1425	3.97572				DPP4	5012.51	5401.08	5978.8	7011.97	-1.16714	-0.222972	0.000299099	0.00669796	5851.09	-3.61608
KCNK15	37.7857	24.9327	19.2611	21.1765	1.38316	0.467969	7.31296e-05	0.00203523	25.789	3.96587				BZW1	3577.91	3486.25	3923.45	3757.77	-1.10019	-0.137758	0.000305206	0.0068136	3686.34	-3.61084
SIDT2	816.683	774.41	711.99	671.495	1.1387	0.187392	7.34456e-05	0.00203618	743.644	3.96484				TMEM229B	26.3579	37.1034	45.4129	53.9919	-1.32235	-0.403107	0.000309637	0.00689121	40.7165	-3.6071
SLC44A1	1916.26	1811.19	1711.8	1628.75	1.12347	0.167968	7.46047e-05	0.00205647	1767	3.9611				CLUAP1	341.149	382.733	410.957	379.391	-1.17846	-0.236909	0.000311928	0.00693151	378.557	-3.60519
ACVRL1	1446.56	1434.33	1175.36	1140.27	1.20741	0.271916	7.59873e-05	0.00208662	1299.13	3.95672				PLEKHG3	73.8549	85.5099	106.076	110.204	-1.28555	-0.362385	0.000315104	0.00699135	93.9111	-3.60256
GNPNAT1	870.996	890.313	753.81	811.714	1.14038	0.18951	7.85671e-05	0.00214929	831.708	3.94873				TMOD1	31.5679	39.182	53.2833	66.1492	-1.32836	-0.409642	0.000330135	0.00728011	47.5456	-3.59043
SLC44A2	4240.85	4608.9	3813.01	4122.56	1.09866	0.135741	7.88642e-05	0.00215334	4196.33	3.94783				EIF4G2	13451.7	13816.5	14343.4	15064.7	-1.07116	-0.0991788	0.000331228	0.00728198	14169.1	-3.58957
SCARB1	419.561	426.63	331.341	354.935	1.20183	0.265236	8.16551e-05	0.00222533	383.117	3.93949				SPATA13	609.223	658.78	731.21	739.678	-1.18348	-0.24304	0.000331113	0.00728198	684.723	-3.58966
P4HA3	136.633	97.0478	95.5382	64.988	1.31873	0.399144	8.22659e-05	0.00223776	98.5517	3.9377				PI4K2B	365.226	347.527	437.244	385.8	-1.18109	-0.240125	0.000335836	0.00737206	383.949	-3.58596
PPAPDC1B	636.92	653.87	523.743	547.268	1.18213	0.241393	8.24503e-05	0.00223856	590.45	3.93716				ETS1	696.336	648.42	819.163	693.214	-1.16384	-0.218893	0.000363557	0.00788472	714.283	-3.56522
EHBP1	2544.14	2662.08	2269.98	2428.32	1.12057	0.164229	8.8461e-05	0.00239079	2476.13	3.92024				UQCRB	1494.21	1529.93	1695.54	1638.93	-1.11854	-0.161621	0.000368793	0.00798628	1589.65	-3.56146
ITPR2	292.179	294.286	228.212	218.27	1.23138	0.300274	8.85539e-05	0.00239079	258.237	3.91999				MGAT5	1158.34	1219.67	1277.05	1357.69	-1.11814	-0.161104	0.000373338	0.00804849	1253.19	-3.55825
SLC52A2	515.626	511.474	415.482	501.467	1.18309	0.242566	8.9454e-05	0.00241059	486.012	3.91755				GPX1	2613.85	2189.77	2827.39	2439.75	-1.10172	-0.13976	0.000376032	0.00809449	2517.69	-3.55636
CHCHD7	310.682	272.653	249.298	224.91	1.21334	0.278979	9.26783e-05	0.00248357	264.386	3.909				PERP	2872.36	3047.58	3195.11	3408.68	-1.11165	-0.152704	0.000382039	0.00819936	3130.93	-3.55219
SYBU	97.591	83.6741	66.2634	49.5368	1.32847	0.409764	9.4632e-05	0.00252655	74.2663	3.90396				FBXL7	754.34	782.495	856.299	891.16	-1.12952	-0.175712	0.000383093	0.00820397	821.074	-3.55146
SOX13	254.186	246.299	193.735	183.57	1.25325	0.32567	9.57073e-05	0.00255055	219.448	3.90122				LY6K	161.11	114.608	209.931	161.743	-1.23833	-0.308396	0.000383389	0.00820397	161.848	-3.55126
ABLIM3	1982.07	1909.21	1642.2	1555.17	1.16227	0.216942	9.60332e-05	0.00255452	1772.16	3.9004				TBX5-AS1	723.549	767.453	816.148	805.657	-1.12783	-0.173555	0.000384563	0.00821691	778.202	-3.55046
BTD	371.741	362.521	302.962	296.958	1.19805	0.260683	9.85864e-05	0.00261281	333.545	3.89404				FRS2	598.644	621.489	684.162	696.336	-1.13157	-0.178325	0.000386838	0.0082533	650.158	-3.5489
EYA2	174.277	174.056	134.948	134.477	1.27917	0.355203	9.85816e-05	0.00261281	154.44	3.89406				KIAA1671	157.765	175.458	205.525	236.658	-1.23728	-0.307168	0.000389335	0.00829432	193.851	-3.54721
BBX	1304.82	1375.97	1168.43	1233.17	1.1146	0.156528	9.94297e-05	0.00262874	1270.6	3.89198				CORO1C	4267.69	4563.25	4579.48	4929.93	-1.08431	-0.116773	0.000394472	0.00836676	4585.09	-3.54375
CNN2	4042.64	3610.38	3642.01	3439.79	1.10109	0.138938	9.95516e-05	0.00262874	3683.71	3.89168				MCU	693.599	636.312	808.027	698.671	-1.14599	-0.196592	0.000412579	0.00867437	709.152	-3.5319
CACNB2	25.6114	29.5385	12.454	17.0766	1.34402	0.426557	0.000105522	0.00277119	21.1701	3.87753				SMEK1	677.455	738.343	755.61	747.523	-1.11304	-0.1545	0.000412115	0.00867437	729.733	-3.5322
MIF	1008.33	955.824	818.423	849.916	1.21725	0.283623	0.000109658	0.0028452	908.124	3.86816				MICAL3	533.084	600.716	613.936	642.77	-1.13928	-0.188122	0.000418582	0.00878778	597.626	-3.52808
FSTL3	583.982	563.609	487.473	468.669	1.1892	0.249985	0.00011745	0.00302398	525.933	3.85139				SEPT9	7263.26	6588.95	8082.45	7602.96	-1.11403	-0.155793	0.000420923	0.00881132	7384.41	-3.52661
FAM109A	382.861	401.789	304.312	327.602	1.22206	0.28932	0.000119573	0.00307316	354.141	3.847				RGS3	406.136	422.011	474.39	503.562	-1.17349	-0.2308	0.000426439	0.00891387	451.525	-3.52316
GEM	401.905	392.135	283.91	262.847	1.28536	0.362168	0.000123443	0.00316698	335.199	3.83919				CD9	1283.13	1185.61	1489.85	1331.2	-1.15585	-0.208956	0.000429784	0.00895787	1322.45	-3.52109
CASP4	663.335	677.479	565.751	566.621	1.17163	0.228512	0.000134209	0.00342494	618.297	3.8186				MRPS16	688.763	687.744	783.468	704.65	-1.13242	-0.179408	0.000433851	0.00902959	716.156	-3.51859
B3GNT5	87.0118	72.9318	56.2732	46.4354	1.33888	0.421026	0.000139256	0.00354122	65.663	3.80949				CES4A	244.574	219.294	302.25	240.823	-1.20075	-0.263935	0.000445646	0.00922667	251.735	-3.51146
SLC1A1	370.542	344.174	312.454	278.921	1.18387	0.243511	0.000141527	0.00358635	326.523	3.80548				PLK2	504.564	426.157	608.893	474.725	-1.18964	-0.250528	0.000446485	0.00922667	503.584	-3.51096
NBL1	5449.14	5136.5	4352.41	4369.56	1.21777	0.284239	0.000144851	0.00365637	4826.9	3.79974				LOXL1	2782.75	2650.87	3386.37	3455.28	-1.1831	-0.242568	0.000447865	0.00924137	3068.82	-3.51014
PRSS12	3532.2	3915.29	3131.06	3235.29	1.13914	0.187949	0.00014506	0.00365637	3453.46	3.79938				TNIK	69.6716	60.7598	100.558	84.6671	-1.27625	-0.351909	0.000456045	0.00938335	78.914	-3.50533
HIP1R	782.022	745.427	672.782	628.906	1.15878	0.212602	0.000147876	0.00371465	707.284	3.79461				TMEM119	3720.91	3654.45	4551.91	4385.71	-1.20786	-0.272454	0.000459537	0.00944176	4078.24	-3.5033
AF131217.1	130.592	137.842	96.0611	98.5771	1.29309	0.370825	0.000148464	0.00372293	115.768	3.79363				ALDH9A1	1714.03	1509.34	1913.51	1688.69	-1.10595	-0.14529	0.00046365	0.00951272	1706.39	-3.50092
NR2F1-AS1	295.297	304.523	227.967	207.387	1.2502	0.322164	0.00014912	0.00373291	258.793	3.79253				CARHSP1	854.843	754.451	1023.84	911.546	-1.17968	-0.238402	0.000470418	0.0096379	886.17	-3.49706
TNFAIP8L3	50.2125	55.4545	29.2804	33.0472	1.34802	0.430847	0.000149475	0.00373532	41.9987	3.79194				RASA1	835.79	890.218	938.28	935.949	-1.11609	-0.158451	0.000478023	0.009766	900.059	-3.49278
CYB5R3	12698	12788.1	11419	12028.8	1.10156	0.139552	0.000149973	0.00374129	12233.5	3.79111				CDCP1	74.4762	58.1672	130.694	102.555	-1.33329	-0.414987	0.000482476	0.00980151	91.4733	-3.4903
GPR126	106.384	107.013	45.7417	52.0254	1.37589	0.460367	0.000153917	0.00382645	77.7908	3.78466				RP11-253M7.1	52.7067	46.4268	76.296	80.8594	-1.2907	-0.368149	0.000485	0.00983896	64.0722	-3.48891
ALDH1L2	3551.44	3187.64	3009.06	2629.44	1.17575	0.233586	0.000169476	0.00417021	3094.39	3.76064				MEIS1	1142.83	1106.64	1285.79	1256.7	-1.10577	-0.145047	0.000498125	0.0100488	1197.99	-3.48176
PTPRQ	55.3604	82.1433	28.1959	42.8952	1.33546	0.417332	0.000172056	0.00422648	52.1487	3.75686				DYRK2	485.13	447.319	563.332	500.759	-1.14443	-0.194626	0.000503733	0.0101336	499.135	-3.47876
ACVR2A	348.299	383.128	281.874	358.433	1.22975	0.29837	0.000181889	0.00443784	342.934	3.74293				TSPYL2	614.96	559.68	703.209	577.38	-1.15382	-0.206423	0.000509558	0.0102223	613.807	-3.47568
C15orf61	128.587	137.466	95.7554	98.0282	1.26973	0.344519	0.000188645	0.00457178	114.959	3.73376				WWC3	910.746	994.036	1036.34	1133.27	-1.12024	-0.163812	0.000508945	0.0102223	1018.6	-3.476
SCARA5	284.183	316.965	240.42	197.902	1.25753	0.330589	0.000194533	0.00467526	259.867	3.72601				NEMF	641.415	714.781	716.338	768.706	-1.11364	-0.155289	0.000515576	0.0103287	710.31	-3.47253
RCOR3	636.291	616.938	560.564	578.173	1.13542	0.183226	0.000200179	0.00478707	597.991	3.71879				EXOC6	71.2628	84.0239	99.8739	105.654	-1.26939	-0.344134	0.000530297	0.0106089	90.2037	-3.46497
PRKG1	986.514	953.813	865.744	865.516	1.14007	0.189127	0.000206016	0.00489424	917.897	3.71152				SLC20A1	1148.41	1135.94	1331.65	1359.31	-1.15502	-0.20792	0.000534231	0.0106728	1243.83	-3.46298
HSPA5	7078.86	7523.28	6307.5	6859.93	1.10264	0.140962	0.000217479	0.00514118	6942.39	3.6978				CUL4B	1454.15	1374.06	1619.05	1512.72	-1.10543	-0.14461	0.000537443	0.0107073	1489.99	-3.46137
VASN	5073.02	4708.81	4226.37	4215.65	1.17721	0.235376	0.000226572	0.00533867	4555.96	3.68738				PPT2-EGFL8	8.54352	17.365	33.1217	15.9564	-1.23228	-0.301325	0.000564694	0.0111732	18.7466	-3.44803
LAMB2	14149.6	14421.7	12915.6	13429.1	1.10545	0.144628	0.000228757	0.00538137	13729	3.68494				TMEM159	478.504	534.445	562.013	552.072	-1.15555	-0.208574	0.000567193	0.0112073	531.758	-3.44684
AR	978.325	895.793	849.606	834.23	1.14374	0.193761	0.000233211	0.00545949	889.488	3.68002				GLS	2092.1	2423.41	2390.84	2660.36	-1.12982	-0.176092	0.000574182	0.0113089	2391.68	-3.44353
RP11-312O7.2	91.4592	72.469	53.9574	80.615	1.33331	0.415013	0.000240447	0.0055846	74.6252	3.67223				PIK3IP1	456.927	432.375	566.602	521.055	-1.19997	-0.262995	0.000574684	0.0113089	494.24	-3.44329
CTSB	31111	30005.2	28213.5	27743.6	1.08824	0.122001	0.000257989	0.0059527	29268.3	3.6542				LINC00341	374.242	313.842	449.02	402.356	-1.16746	-0.223369	0.000579677	0.0113916	384.865	-3.44095
RPN1	2734.08	2808.12	2450.13	2580.92	1.098	0.134875	0.000262362	0.00603434	2643.31	3.64988				STK32B	489.056	507.213	579.311	678.543	-1.17902	-0.237585	0.000582995	0.0114413	563.531	-3.4394
PPIC	963.49	967.843	849.163	798.036	1.16607	0.221649	0.000267654	0.00613478	894.633	3.64475				PINK1	1345.51	1294.22	1476.65	1470.87	-1.10397	-0.142699	0.000586709	0.011483	1396.81	-3.43769
ADAM19	537.975	372.568	467.838	357.917	1.15474	0.207562	0.000279625	0.00634051	434.075	3.63348				EPHB2	51.9935	53.5726	82.4723	66.7049	-1.31622	-0.396396	0.000593549	0.0115759	63.6858	-3.43455
SEZ6L2	494.761	412.415	409.953	391.345	1.16197	0.216574	0.000279334	0.00634051	427.118	3.63375				PLEKHM1	859.937	837.399	967.685	936.075	-1.12033	-0.163924	0.000593861	0.0115759	900.274	-3.4344
MORF4L2	3328.63	3276.15	3014.91	2914.37	1.09574	0.131904	0.000304464	0.00680756	3133.52	3.61147				SLIT2	2214.12	2084.81	2591.58	2531.11	-1.15331	-0.205785	0.000601876	0.0117005	2355.41	-3.43077
NUAK1	440.704	464.081	365.721	418.055	1.17936	0.238006	0.000306024	0.00682132	422.14	3.61015				CIT	1033.53	847.316	1451.4	1130.57	-1.27313	-0.348378	0.000604317	0.0117322	1115.71	-3.42967
SLC15A4	409.64	425.829	351.136	401.096	1.15779	0.211368	0.000316934	0.00702115	396.925	3.60105				RTFDC1	1183.18	1105.15	1293.89	1189.16	-1.09281	-0.128039	0.000617209	0.0119617	1192.85	-3.42394
CACNA2D1	786.151	826.069	702.294	749.067	1.12142	0.165333	0.000323352	0.00715237	765.895	3.59584				CDK14	414.869	441.768	484.91	508.09	-1.14542	-0.195877	0.000619792	0.0119843	462.409	-3.4228
ASH2L	665.294	650.614	581.51	574.531	1.13626	0.184295	0.000324339	0.00716323	617.987	3.59504				MOK	160.791	168.026	199.743	183.813	-1.20904	-0.273861	0.000622573	0.0120059	178.093	-3.42158
INTS8	809.991	817.986	725.212	693.778	1.12708	0.172584	0.000341138	0.00747709	761.742	3.58187				SNX9	4036.57	4073.29	4463.76	4479.91	-1.10158	-0.139571	0.000631445	0.0121608	4263.38	-3.41774
FOSL2	1747.89	1762.57	1557.89	1574.03	1.12726	0.172817	0.000345199	0.00754321	1660.59	3.57878				CHD4	2821.18	2746	3086.78	3020.72	-1.08213	-0.113877	0.000635878	0.0122299	2918.67	-3.41583
THSD4	1312.53	1384.96	1129.3	1205.23	1.15281	0.205156	0.000344688	0.00754321	1258.01	3.57917				EFR3A	1443.43	1586.33	1584.23	1749.39	-1.08661	-0.119839	0.000637251	0.01224	1590.85	-3.41524
SPON2	1597.72	1564.16	1232.84	1258.49	1.21713	0.283489	0.000348005	0.00759304	1413.3	3.57667				NBR1	2653.11	2490.17	2861.53	2653.91	-1.08294	-0.114957	0.000666866	0.0127579	2664.68	-3.40285
DOK1	377.723	350.209	315.416	322.907	1.16366	0.218667	0.000349658	0.00761759	341.564	3.57543				ARF6	1034.54	1035.89	1161.66	1217.36	-1.11858	-0.161663	0.000680042	0.0129756	1112.36	-3.3975
INPP5F	434.988	416.925	362.54	369.22	1.17681	0.234884	0.000354008	0.00770074	395.918	3.57219				GNG12	5194.21	5189.53	5570.66	5653.33	-1.0693	-0.0966703	0.000683277	0.013003	5401.93	-3.3962
IGSF8	442.744	490.51	366.609	422.936	1.17895	0.237507	0.000359426	0.00780684	430.7	3.56821				HSPA4	1852.43	2011.9	1997.65	2097.41	-1.08153	-0.11307	0.000685857	0.0130349	1989.85	-3.39517
HIPK2	724.326	827.122	628.821	769.537	1.14214	0.191734	0.000370533	0.00801194	737.451	3.56023				STMN2	158.787	107.167	195.824	129.298	-1.21453	-0.2804	0.000688842	0.0130744	147.769	-3.39398
ADAMTS7	593.307	681.19	504.699	581.284	1.19191	0.253278	0.00037187	0.00802883	590.12	3.55928				TGFBR3	4130.42	4771.33	4722.76	5367.59	-1.12473	-0.169583	0.000706877	0.013364	4748.02	-3.3869
AKAP13	1382.48	1292.1	1252.06	1226.26	1.10915	0.149451	0.000379555	0.00815817	1288.22	3.55391				DENND2A	577.679	517.619	670.417	575.125	-1.16007	-0.214217	0.000736265	0.0138115	585.21	-3.37571
BCL7A	130.355	132.656	90.375	87.9718	1.28825	0.365412	0.000393942	0.00836676	110.339	3.54411				FAM214A	381.768	357.683	451.703	405.928	-1.16215	-0.216796	0.00074206	0.0138838	399.271	-3.37355
BPI	25.6941	20.0393	12.2119	7.62467	1.30143	0.380093	0.000393739	0.00836676	16.3925	3.54424				TMEM130	92.9367	61.1851	138.362	97.8963	-1.30148	-0.380148	0.000741674	0.0138838	97.5951	-3.37369
SNCAIP	168.822	141.21	117.587	106.174	1.28973	0.367066	0.000399303	0.0084568	133.448	3.54054				PPP1R14C	30.7521	32.78	52.8016	51.0508	-1.30611	-0.385278	0.00076656	0.0142683	41.8461	-3.3646
HNMT	191.836	242.292	155.77	194.096	1.22423	0.291873	0.000409553	0.00866117	195.999	3.53385				RAB27B	139.646	152.347	196.958	202.423	-1.26702	-0.341437	0.000767579	0.0142689	172.843	-3.36423
OLFML2B	399.528	427.567	306.692	300.912	1.24195	0.312613	0.000410278	0.00866383	358.675	3.53338				AKR1C1	1324.18	1701.49	1577.24	2112.7	-1.17056	-0.2272	0.000789823	0.0145327	1678.9	-3.35634
MATN2	1288.34	999.078	1039.65	758.35	1.18592	0.246007	0.000410932	0.00866496	1021.35	3.53296				BATF2	20.8875	18.1458	35.5734	25.3451	-1.3164	-0.396602	0.000789464	0.0145327	24.988	-3.35646
SFRP1	4225.11	4271.7	3675.86	3294.11	1.12339	0.167862	0.000420106	0.00880698	3866.7	3.52712				GAP43	6.7725	7.35929	19.6787	12.8414	-1.28403	-0.360676	0.000788658	0.0145327	11.663	-3.35675
ARRDC1	369.017	364.852	278.203	288.963	1.23617	0.305873	0.000428288	0.00893959	325.259	3.52201				OGDH	1942.61	1861.92	2078.52	2045.73	-1.08793	-0.121587	0.000784355	0.0145327	1982.19	-3.35826
SSTR1	1007.09	1212.71	833.301	1022.65	1.17456	0.232126	0.000435888	0.00905894	1018.94	3.51734				RP11-644F5.10	158.243	186.792	206.855	215.112	-1.24456	-0.315633	0.000788966	0.0145327	191.751	-3.35664
MARCKSL1	278.109	276.759	219.153	237.871	1.23021	0.298905	0.000438407	0.00909821	252.973	3.51581				TMEM183A	672.374	691.408	758.446	723.134	-1.11948	-0.162825	0.000789473	0.0145327	711.34	-3.35646
ASPA	144.014	156.453	98.8016	106.257	1.28477	0.361507	0.000446513	0.00922667	126.381	3.51095				SCARA3	1133.73	906.385	1352.04	1078.4	-1.18224	-0.241526	0.000795301	0.0146149	1117.64	-3.35443
SGK1	952.046	931.396	787.429	737.464	1.18277	0.242172	0.000453255	0.00933925	852.084	3.50696				VAT1L	32.5565	23.9422	53.3825	46.7797	-1.29471	-0.372632	0.000820906	0.0150281	39.1652	-3.34565
RNF157	144.335	130.305	104.779	106.078	1.27913	0.355161	0.000472818	0.00967336	121.374	3.4957				SOCS1	30.907	37.2302	47.9925	35.226	-1.30111	-0.379741	0.000844317	0.0153787	37.8389	-3.33784
ADAM15	1390.77	1621.39	1196.8	1384.99	1.13917	0.187981	0.00048108	0.00978694	1398.49	3.49108				EMP1	3782.35	3306.23	4050.57	3651.95	-1.08828	-0.122056	0.000860588	0.0156553	3697.78	-3.33253
ANPEP	15936.6	12706.8	13928	10899.7	1.12599	0.171191	0.000480466	0.00978694	13367.8	3.49142				IGFBP5	21294.5	29825.7	26777.5	38782.6	-1.22762	-0.295861	0.000864648	0.0157094	29170.1	-3.33122
C1RL	751.475	666.367	647.024	570.643	1.16662	0.22233	0.00047976	0.00978694	658.877	3.49181				HSPA8	10434.5	11912.9	11536.2	13112.9	-1.10393	-0.142649	0.000906787	0.0163784	11749.1	-3.31796
FAM101B	605.789	620.144	506.594	509.346	1.19016	0.251161	0.00049366	0.0100006	560.468	3.48417				H2AFY	1069.53	1032.34	1176.42	1100.7	-1.09798	-0.134849	0.000911348	0.0164315	1094.75	-3.31655
B3GALT2	40.0083	53.0479	20.1367	15.7493	1.29737	0.375586	0.000495186	0.0100175	32.2356	3.48335				NARS2	150.282	156.245	188.577	202.501	-1.20939	-0.274277	0.000912355	0.0164315	174.401	-3.31625
LMF2	1641.91	1587.93	1377.95	1445.8	1.16069	0.214977	0.000496342	0.0100268	1513.4	3.48272				CTTN	5876.06	5913.81	6222.26	6232.98	-1.05875	-0.0823648	0.000913614	0.0164337	6061.28	-3.31586
GSTM5	583.273	553.646	505.145	496.131	1.1571	0.210508	0.000500505	0.0100827	534.548	3.48049				NTF3	108.248	106.916	150.704	140.03	-1.26437	-0.338419	0.000917228	0.0164782	126.475	-3.31476
ADH1B	844.741	1511.38	749.76	1325.32	1.24062	0.311061	0.000535805	0.0106894	1107.8	3.46219				HSP90AA1	7601.59	8876.76	8354.38	9633.76	-1.09879	-0.135914	0.00092184	0.0165404	8616.62	-3.31335
NT5E	6518.54	6106.01	5767.83	5261.91	1.12073	0.164443	0.000549695	0.0109364	5913.57	3.45529				MYOC	12.4676	16.1279	24.3114	21.8398	-1.27477	-0.35024	0.000924959	0.0165758	18.6867	-3.31241
PNPLA2	1591.45	1608.3	1392.29	1516.89	1.12924	0.175347	0.000551029	0.0109478	1527.23	3.45464				IFIT2	266.552	311.564	407.409	327.834	-1.29615	-0.374234	0.000940832	0.0167977	328.34	-3.30765
CST3	3645.85	3902.75	3266.64	3556.43	1.11222	0.153444	0.000552376	0.0109595	3592.92	3.45398				EVA1A	212.164	175.317	260.392	239.021	-1.21074	-0.275887	0.000943673	0.0168135	221.724	-3.3068
PPAP2A	919.904	831.413	811.589	763.886	1.15318	0.205617	0.000555185	0.0110001	831.698	3.45261				COL27A1	554.272	529.715	640.922	619.218	-1.1411	-0.190429	0.000950555	0.0168735	586.032	-3.30477
NAPEPLD	178.04	206.235	143.244	168.67	1.2182	0.284755	0.000570883	0.0112648	174.047	3.44508				FAM102A	967.357	887.126	1101.89	1066.2	-1.13014	-0.176505	0.000958461	0.0169865	1005.64	-3.30244
EBF1	775.631	763.361	661.787	652.421	1.17486	0.232491	0.000586477	0.011483	713.3	3.43779				EXOC6B	695.013	739.917	802.212	861.542	-1.14202	-0.191591	0.000967263	0.0170796	774.671	-3.29988
FBLIM1	1239.35	1076.07	1101.37	1026.81	1.11772	0.160563	0.000591292	0.011557	1110.9	3.43558				ARHGAP22	395.794	407.074	502.748	495.271	-1.19489	-0.256878	0.000969969	0.0171065	450.222	-3.2991
ARHGEF6	483.142	473.741	425.552	432.115	1.1457	0.196233	0.000595983	0.0116016	453.638	3.43344				HSDL2	620.809	672.562	702.8	727.119	-1.13015	-0.176515	0.00097781	0.0171819	680.822	-3.29683
NQO1	6948.77	7667.81	5763.67	5971.75	1.15613	0.2093	0.000617793	0.0119617	6588	3.42368				CCT2	1097.24	1155.33	1193.94	1192.61	-1.09327	-0.128656	0.000988168	0.0173217	1159.78	-3.29387
FOXP4	336.869	326.284	263.988	275.804	1.2138	0.27953	0.000621206	0.0119956	300.736	3.42218				SYNPO	900.367	818.418	1025.97	908.935	-1.14473	-0.195001	0.000993749	0.0173984	913.423	-3.29229
SMPD1	2528.42	2544.44	2291.06	2309.11	1.084	0.116364	0.000639914	0.0122748	2418.26	3.41411				SLC16A7	225.952	230.58	273.327	283.65	-1.17501	-0.232677	0.000995874	0.0174145	253.378	-3.29169
ANKRD28	2204.82	1939.98	1981.46	1738.33	1.11188	0.153005	0.000645431	0.0123642	1966.15	3.41177				LSM3	231.117	258.542	275.673	261.66	-1.17645	-0.234443	0.000999908	0.0174639	256.748	-3.29055
TMEM214	1720.36	1656.4	1567.95	1592.79	1.09174	0.126624	0.000668171	0.012766	1634.37	3.40232				ASCC3	2065.52	2168.12	2211.25	2334.95	-1.08095	-0.112306	0.00100744	0.0175743	2194.96	-3.28844
AACS	942.712	812.431	814.463	690.606	1.13869	0.18738	0.000682223	0.013	815.053	3.39663				DAB2IP	1266.84	1253.07	1423	1469.5	-1.11734	-0.160064	0.00101538	0.0176914	1353.1	-3.28623
ACTA2	1945.08	2489.24	1417.92	1740.81	1.25698	0.329964	0.000697988	0.0132306	1898.26	3.39037				C3	75.0907	80.6413	107.304	125.494	-1.26351	-0.337436	0.00102042	0.0177577	97.1325	-3.28484
ANXA2P2	303.504	256.02	255.328	229.631	1.17031	0.226888	0.000706066	0.013364	261.121	3.38721				BIVM	567.186	602.857	661.733	628.123	-1.15084	-0.202689	0.00103392	0.017971	614.974	-3.28113
TSC22D4	812.054	749.927	699.689	729.023	1.14183	0.191347	0.000708549	0.0133781	747.673	3.38625				COL13A1	199.276	172.982	241.173	219.938	-1.19716	-0.259616	0.00103662	0.0179962	208.342	-3.2804
H6PD	2372.27	2478.2	2166.46	2283.42	1.09925	0.136519	0.000711047	0.0133952	2325.09	3.38528				KIAA1958	49.9557	47.6103	72.8122	64.7274	-1.27906	-0.355083	0.00105947	0.018371	58.7764	-3.27424
LAPTM4B	816.445	860.277	714.183	788.121	1.13152	0.178259	0.000711308	0.0133952	794.756	3.38518				ETHE1	417.115	415.723	499.529	483.361	-1.1598	-0.213871	0.00107933	0.0186653	453.932	-3.26899
HSD17B4	1226.29	1269.23	1103.41	1158.97	1.10924	0.149566	0.000715226	0.0134515	1189.48	3.38367				NDUFV2	532.166	530.751	597.241	519.534	-1.12033	-0.163922	0.00112285	0.0192389	544.923	-3.25779
AHNAK2	8696.67	8372.25	7860.02	8338.27	1.09312	0.128451	0.000736281	0.0138115	8316.8	3.3757				GRIA3	412.776	443.912	487.568	513.459	-1.15482	-0.207663	0.0011363	0.0194464	464.429	-3.25441
KDELR3	1500.7	1319.18	1340.14	1191.66	1.10639	0.145864	0.000754307	0.0140947	1337.92	3.36904				FAM211A	41.7641	36.2875	64.9653	54.4829	-1.29208	-0.369694	0.00114822	0.0196272	49.3749	-3.25144
TRIM29	54.9353	47.9187	35.5614	30.5187	1.31	0.389562	0.000757181	0.0141301	42.2335	3.36799				RASSF8	1683.54	1629.08	1882.33	1855.23	-1.11627	-0.158681	0.00116472	0.0198857	1762.55	-3.24738
CASC10	336.243	394.132	280.216	274.542	1.17261	0.229729	0.000765875	0.0142683	321.283	3.36484				SPIRE1	691.48	735.357	779.942	787.638	-1.12391	-0.168525	0.00116733	0.0199066	748.604	-3.24675
RALGPS1	77.0245	74.3528	52.8423	71.4739	1.28723	0.364269	0.000784724	0.0145327	68.9234	3.35813				FAM180A	591.177	607.391	675.94	678.291	-1.13588	-0.183806	0.00120402	0.0204068	638.2	-3.23793
TRIM56	404.414	463.724	331.453	390.517	1.19004	0.251012	0.000788058	0.0145327	397.527	3.35696				PPP5C	872.378	867.49	973.432	918.893	-1.11027	-0.150908	0.00120514	0.0204068	908.048	-3.23766
FAT4	1208.57	1240.82	1045.1	1103.37	1.16843	0.224568	0.000804319	0.0147619	1149.47	3.3513				SEPHS1	443.834	470.696	528.184	534.81	-1.16173	-0.216276	0.00122305	0.0206618	494.381	-3.23345
TPST1	915.617	869.636	827.823	816.822	1.11098	0.151836	0.0008108	0.0148619	857.475	3.34908				CCND1	15300.6	15805.5	16513.2	16980.4	-1.08756	-0.121091	0.00122813	0.0207233	16149.9	-3.23227
AC007743.1	17.6152	12.683	6.0324	7.94212	1.30141	0.380074	0.000831909	0.0152102	11.0682	3.34195				FCHO2	515.211	498.611	583.992	551.116	-1.12432	-0.169051	0.00123055	0.0207399	537.233	-3.2317
DPYSL2	4087.91	3830.82	3752.99	3748.72	1.09119	0.125902	0.000833319	0.0152168	3855.11	3.34148				SDC3	2287.08	2406.55	2524.56	2648.76	-1.10138	-0.139319	0.00124727	0.0209483	2466.74	-3.22784
MSANTD3-TMEFF1	100.752	33.7068	37.7037	0	1.00463	0.0066645	0.000842789	0.0153703	43.0406	3.33835				ESR1	50.0511	43.2885	71.8335	61.6628	-1.2726	-0.347774	0.0012489	0.0209514	56.709	-3.22747
GPR161	303.941	294.341	253.863	239.662	1.18371	0.243319	0.000887565	0.0161055	272.952	3.32394				IGFBP3	4518.9	4886.76	6907.08	8751.59	-1.26897	-0.343659	0.00125699	0.0210138	6266.08	-3.22562
RASD1	140.206	144.512	101.983	107.169	1.28172	0.358081	0.00089051	0.0161387	123.467	3.32301				SLC38A5	108.416	113.599	141.384	130.446	-1.2414	-0.311969	0.0012563	0.0210138	123.461	-3.22578
WNT2B	516.644	385.52	449.745	334.286	1.14199	0.191549	0.000898762	0.0162678	421.548	3.32044				STXBP5	701.472	669.965	791.674	773.638	-1.12112	-0.164939	0.00127317	0.0212351	734.187	-3.22196
FNDC3B	3244.48	3353.01	2964.73	3139.37	1.09873	0.135833	0.000907138	0.0163784	3175.4	3.31785				S1PR3	1665.32	1700.02	1914.35	2060.25	-1.13884	-0.187561	0.00128704	0.0214068	1834.99	-3.21885
KBTBD11	35.8026	29.2339	20.3261	18.749	1.28871	0.365933	0.000936299	0.0167582	26.0279	3.309				TP53INP1	1212.68	1255.78	1341.42	1310.02	-1.10098	-0.138793	0.00129102	0.0214339	1279.98	-3.21797
TRABD	370.431	356.578	307.381	377.236	1.1761	0.234007	0.000939937	0.0167977	352.907	3.30791				ANXA5	14535.8	13733.3	15638.1	14828.3	-1.07302	-0.101676	0.00129497	0.0214502	14683.9	-3.21709
PLCL1	58.4886	79.6617	39.6294	36.6532	1.28485	0.361604	0.00094404	0.0168135	53.6082	3.30669				EIF5	3138.24	3001.45	3358.83	3171.57	-1.06995	-0.0975452	0.00132891	0.0219619	3167.53	-3.20966
LRP1	33510.6	33006.5	30492.6	32526.9	1.10081	0.138571	0.000948877	0.0168735	32384.2	3.30526				MAP2K6	39.4213	26.0599	62.6311	48.0634	-1.29471	-0.372633	0.00133229	0.0219927	44.0439	-3.20893
MT1E	162.135	114.325	123.562	77.6755	1.22843	0.296816	0.000950915	0.0168735	119.424	3.30466				CBWD3	38.4874	55.3004	65.5982	46.1507	-1.28536	-0.362172	0.00134537	0.0221833	51.3842	-3.20612
IMPDH1	760.293	668.93	644.636	601.596	1.15295	0.205326	0.000961378	0.0170173	668.864	3.30159				AKR1C3	283.538	314.27	355.409	398.433	-1.1932	-0.254838	0.00135606	0.0222832	337.912	-3.20384
FOXN3	1498.19	1683.57	1360.91	1518.35	1.1078	0.147703	0.000966929	0.0170796	1515.25	3.29998				MTSS1	142.992	158.584	194.316	205.938	-1.25112	-0.323224	0.00136098	0.0223132	175.458	-3.2028
DERL1	1073.6	1154.42	971.204	1056.44	1.10097	0.138781	0.000973103	0.0171408	1063.92	3.29819				C12orf5	176.631	187.355	214.028	206.05	-1.20024	-0.26332	0.00136556	0.0223377	196.016	-3.20183
PLEC	20068.4	18488.3	17598.6	17129.5	1.13182	0.178649	0.00097726	0.0171819	18321.2	3.29699				QPCT	246.102	262.96	297.472	280.835	-1.18099	-0.239992	0.00136432	0.0223377	271.842	-3.20209
CUL7	1157.75	957.767	1052.36	860.432	1.09484	0.130717	0.00097968	0.0171938	1007.08	3.2963				SMARCA1	1353.14	1210.62	1481.86	1424.35	-1.09097	-0.125611	0.00139932	0.0228016	1367.49	-3.19479
TXNDC16	170.859	167.085	136.417	151.234	1.22351	0.291027	0.00106854	0.018506	156.399	3.27183				SIPA1L1	1173.99	1089.09	1349.17	1313.41	-1.12228	-0.166435	0.0014038	0.0228339	1231.42	-3.19387
ITPKC	675.087	631.754	573.762	546.575	1.15754	0.211066	0.00108032	0.0186653	606.795	3.26873				C16orf45	2334.04	2243.58	2653.62	2605.71	-1.12114	-0.16497	0.0014243	0.0231152	2459.24	-3.18968
SLC2A10	1194.17	1216.72	1103.04	1157.74	1.08478	0.117402	0.00108359	0.0186993	1167.92	3.26787				NRD1	2200.26	2160.72	2369.46	2285.76	-1.08092	-0.112258	0.00142682	0.0231302	2254.05	-3.18917
PLXNB1	1940.85	2151.61	1768.46	1948.77	1.09691	0.133451	0.00108521	0.0187049	1952.42	3.26745				FAM20A	275.608	261.293	352.147	328.597	-1.20255	-0.266095	0.00145065	0.0233853	304.411	-3.18438
MYO16	13.9475	15.7593	5.78935	5.65663	1.25237	0.324664	0.00109297	0.0188162	10.2882	3.26543				RELB	117.041	127.187	144.696	162.176	-1.23086	-0.299672	0.00144601	0.0233853	137.775	-3.18531
RP11-793H13.8	78.4758	177.925	23.1326	114.828	1.00462	0.00665481	0.00109795	0.0188795	98.5903	3.26415				SGSM2	1303.13	1263.08	1445.13	1323.04	-1.10072	-0.138452	0.00144962	0.0233853	1333.59	-3.18458
SEMA3C	5728.59	7679.56	4599.92	6117.74	1.23921	0.30942	0.00110006	0.0188933	6031.45	3.2636				TSPAN5	1587.8	1404.06	1781.56	1462.39	-1.12609	-0.171324	0.00148318	0.0238034	1558.95	-3.17795
MICAL1	3127.64	3370.09	2858.07	2914.83	1.10087	0.138643	0.00110969	0.019036	3067.66	3.26113				DGKA	1382.56	1344.87	1521.24	1480.29	-1.09368	-0.129195	0.00148529	0.0238108	1432.24	-3.17754
SPATC1L	320.619	280.312	256.954	252.382	1.18974	0.250651	0.00117576	0.0200268	277.567	3.2447				UBL3	1439.79	1393.32	1599.83	1509.3	-1.10875	-0.14893	0.00150902	0.0240843	1485.56	-3.17294
CGNL1	90.4195	111.315	56.2265	61.0944	1.29122	0.368734	0.00117918	0.0200613	79.7639	3.24387				TYMS	367.129	340.642	447.813	383.602	-1.1817	-0.240861	0.00151655	0.0241778	384.796	-3.1715
KCNN2	141.207	140.432	83.4886	86.6459	1.28124	0.357537	0.00118828	0.0201924	112.943	3.24168				OSBPL8	1848.83	1949.86	2057.57	2185.05	-1.10249	-0.140766	0.00152685	0.0243151	2010.33	-3.16953
NFIC	3903.81	3553.77	3573.86	3409.62	1.09168	0.126556	0.0012002	0.020371	3610.27	3.23883				HMGA2	969.03	867.889	1139.06	1058.92	-1.14812	-0.199278	0.00153279	0.024356	1008.73	-3.1684
TPRA1	544.646	580.488	475.774	504.48	1.1339	0.181295	0.00121392	0.0205315	526.347	3.23559				SIRPA	1562.89	1704.58	1727.65	1859.03	-1.1083	-0.148347	0.00153944	0.024408	1713.54	-3.16714
ST3GAL1	975.64	977.747	844.447	841.902	1.1466	0.197366	0.00123532	0.020796	909.934	3.2306				KIF13A	2229.08	2047.99	2427.41	2247.31	-1.07849	-0.109019	0.00156922	0.0247714	2237.95	-3.16157
PVRL2	712.688	697.881	629.502	643.039	1.1135	0.155106	0.00124445	0.0209254	670.778	3.22849				PPFIA4	55.155	52.7543	82.2749	74.6851	-1.2787	-0.354673	0.0015799	0.0249128	66.2174	-3.15959
P2RY1	22.7394	34.1018	10.0072	12.5077	1.26895	0.343635	0.00125611	0.0210138	19.839	3.22582				GBP3	424.822	409.484	497.888	459.711	-1.13866	-0.187335	0.00163453	0.025657	447.976	-3.14967
SLC22A15	156.275	174.95	117.64	122.74	1.22383	0.291401	0.00127259	0.0212351	142.901	3.22209				ITPR3	2684.65	2642.53	2972.22	2895.81	-1.10285	-0.141231	0.0016433	0.0256826	2798.8	-3.14811
RP4-758J24.5	69.3557	57.8907	49.8587	46.518	1.27045	0.345334	0.00127569	0.0212527	55.9058	3.22139				OLFML2A	3795.53	4223.44	4962.56	5412.44	-1.24859	-0.320297	0.00164472	0.0256826	4598.49	-3.14786
ATP2A2	4750.92	4849.74	4407.01	4680.21	1.07589	0.105526	0.0012879	0.0214068	4671.97	3.21866				PTPN14	2083.6	2107.94	2270.08	2367.34	-1.09671	-0.133179	0.00164721	0.0256936	2207.24	-3.14742
PTAR1	1090.43	1095.78	955.335	1052.34	1.124	0.168637	0.00129303	0.0214427	1048.47	3.21752				VGLL3	8926.43	9699.56	9982.44	10815.3	-1.09281	-0.128039	0.00169557	0.0263626	9855.94	-3.13895
SPATS2L	2380.13	2414.73	2183.16	2191.27	1.08488	0.117535	0.00129892	0.0214909	2292.32	3.21622				NDRG1	2615.04	2416.76	2817.17	2653.4	-1.08201	-0.113711	0.00174654	0.0270709	2625.59	-3.13026
C1QTNF1	534.381	480.361	449.635	472.335	1.15946	0.213455	0.00135217	0.0222589	484.178	3.20467				RABEP1	1207.62	1291.75	1329.45	1358.54	-1.09216	-0.127184	0.00175127	0.0271119	1296.84	-3.12946
PTGER2	52.2063	39.3381	32.5594	25.8943	1.29509	0.37305	0.00135304	0.0222589	37.4995	3.20449				DAPK2	257.058	206.079	329.65	279.474	-1.21148	-0.276771	0.00175801	0.0271579	268.065	-3.12833
RAB11FIP1	126.331	106.649	96.662	98.4164	1.23137	0.300262	0.00135988	0.0223132	107.015	3.20303				TRMT2B	184.461	179.356	230.573	226.341	-1.20686	-0.271258	0.00175794	0.0271579	205.183	-3.12834
ENAH	1863.68	1961.29	1732.2	1884.5	1.07508	0.104451	0.0013829	0.0225813	1860.42	3.1982				CBX5	1489.73	1531.39	1650.14	1721.62	-1.0998	-0.13724	0.00176511	0.0272385	1598.22	-3.12715
KCNT2	63.7666	53.1044	44.032	30.7751	1.27985	0.35598	0.00138358	0.0225813	47.9195	3.19805				FAM126A	1865.02	2020.61	2120.65	2247.37	-1.1174	-0.160145	0.00179587	0.0275952	2063.42	-3.12207
CDC42EP3	3992.02	3517.3	3454.95	2952.45	1.15206	0.20422	0.00140023	0.0228016	3479.18	3.1946				DUSP14	685.268	671.812	766.326	744.836	-1.1364	-0.184475	0.00180495	0.0276466	717.061	-3.12058
DKFZP761J1410	911.957	950.973	807.277	896.593	1.11119	0.152111	0.00140984	0.0229063	891.7	3.19263				MYO1E	937.295	972.949	1075.3	1130.27	-1.12526	-0.170256	0.00180424	0.0276466	1028.95	-3.1207
PGM1	892.455	878.929	810.667	786.505	1.10263	0.140947	0.00143776	0.0232815	842.139	3.18696				MLPH	208.304	178.993	255.821	212.431	-1.20009	-0.263142	0.0018137	0.0276506	213.887	-3.11916
C12orf44	552.963	521.048	474.576	462.089	1.13591	0.183844	0.00144795	0.0233853	502.669	3.18492				PRNP	4336.13	4885.12	4645	5269.76	-1.07457	-0.103759	0.00181425	0.0276506	4784	-3.11907
CAPS	287.822	255.419	244.713	196.83	1.17026	0.226834	0.00145498	0.0234028	246.196	3.18352				STX3	255.283	248.326	300.676	297.353	-1.15273	-0.205057	0.00180765	0.0276506	275.41	-3.12014
SEC62	2287.21	2471.55	2073.11	2246.15	1.09839	0.135395	0.00145425	0.0234028	2269.5	3.18366				TPP2	931.164	939.642	1035.48	1042.96	-1.1019	-0.139998	0.00182233	0.0277072	987.313	-3.11776
HMG20A	460.936	436.028	394.48	406.405	1.14921	0.200641	0.00147011	0.0236198	424.462	3.18052				IL6R	155.568	164.327	194.05	217.435	-1.19532	-0.257397	0.00183299	0.0278398	182.845	-3.11604
EPDR1	993.193	1061.42	859.4	920.298	1.13548	0.183296	0.00149577	0.0239427	958.577	3.1755				FAM46C	260.092	217.799	338.792	257.421	-1.21849	-0.285098	0.00184754	0.0280314	268.526	-3.1137
MLLT6	1771.58	1819.52	1673.45	1824.03	1.0755	0.10501	0.00149683	0.0239427	1772.14	3.1753				ERBB3	48.0965	48.5436	74.761	65.5165	-1.27601	-0.351642	0.00185159	0.0280633	59.2294	-3.11306
PODNL1	254.731	241.833	209.302	210.662	1.20124	0.264522	0.00149862	0.0239448	229.132	3.17495				FHOD3	491.622	579.383	607.791	716.104	-1.19589	-0.258089	0.00186859	0.0282913	598.725	-3.11036
TM2D1	303.483	310.403	259.604	268.629	1.15197	0.204105	0.00153004	0.0243391	285.53	3.16893				DPY19L1	782.402	867.415	869.057	964.483	-1.10584	-0.145149	0.00187259	0.0283139	870.839	-3.10973
BRD4	1401.81	1349.6	1269.64	1276.88	1.09709	0.13368	0.00153544	0.0243713	1324.48	3.1679				TMEM164	153.172	149.215	191.284	182.92	-1.20873	-0.273487	0.001874	0.0283139	169.148	-3.10951
ARHGAP24	457.846	375.835	390.931	347.65	1.15088	0.202743	0.0015441	0.0244283	393.065	3.16626				PCNA	542.976	585.884	627.287	631.378	-1.14376	-0.193785	0.00190058	0.0286256	596.881	-3.10534
CLASP1	1081.39	1126.45	967.63	997.767	1.11209	0.153268	0.00154295	0.0244283	1043.31	3.16648				CISD1	116.663	124.104	145.932	142.09	-1.20898	-0.273785	0.00190788	0.0287057	132.197	-3.10421
ABCB6	334.314	349.622	286.637	321.948	1.15582	0.208922	0.00155383	0.0245552	323.131	3.16444				NPEPPS	2213.89	2296.11	2389.87	2346.11	-1.07448	-0.103633	0.00191964	0.0288225	2311.5	-3.10239
METRNL	2235.98	2341.69	1929.27	2087.36	1.14832	0.199528	0.00160886	0.0253417	2148.58	3.1543				FMNL1	199.626	173.365	245.083	235.409	-1.1842	-0.243916	0.00193118	0.0289056	213.371	-3.10062
ALDH18A1	1155.7	1126.44	1059.21	1038.39	1.08486	0.117508	0.00162463	0.0255623	1094.94	3.15145				AHRR	1917.6	1784.89	2150.63	1974.5	-1.11237	-0.153638	0.00194303	0.0290228	1956.9	-3.09881
TRIM22	2481.12	2656.28	2245.95	2314.07	1.10102	0.138843	0.00163159	0.0256438	2424.35	3.1502				KRTAP1-5	610.893	458.869	683.21	567.351	-1.19558	-0.257711	0.00196622	0.029308	580.081	-3.09529
GLB1	1912.78	1952.42	1761.74	1778.85	1.0869	0.120216	0.00163953	0.025657	1851.45	3.14878				VPS26A	920.251	956.165	1002.11	994.251	-1.08884	-0.122786	0.0019682	0.029308	968.194	-3.09499
IRF2BPL	976.077	944.033	858.72	871.624	1.13365	0.180969	0.00163636	0.025657	912.613	3.14935				ZNF706	445.796	449.247	504.213	467.843	-1.12242	-0.166607	0.00196545	0.029308	466.775	-3.0954
NNMT	913.801	964.107	752.153	860.268	1.18355	0.243127	0.0016392	0.025657	872.582	3.14884				TPPP3	63.0927	37.6062	100.919	45.7245	-1.29911	-0.377529	0.00197776	0.0293897	61.8355	-3.09355
TGFBR2	3742.31	3965.19	3496.92	3714.55	1.06705	0.0936331	0.00166288	0.0259101	3729.74	3.14465				DNAJB2	1141.61	1233.06	1247.99	1308.65	-1.08513	-0.11787	0.00200282	0.029701	1232.83	-3.08981
SLC19A2	141.427	156.571	107.645	117.841	1.2261	0.294075	0.00167212	0.0260259	130.871	3.14302				NFYB	308.166	333.752	363.181	369.218	-1.15005	-0.201702	0.00200691	0.029731	343.579	-3.08921
ELF1	1027.35	1072.15	875.693	873.415	1.15507	0.207979	0.00173007	0.02687	962.153	3.13304				AIDA	1937.39	2040.39	2092.65	2126.13	-1.07805	-0.108427	0.00202017	0.0298689	2049.14	-3.08725
MN1	1537.58	1447.93	1360.47	1374.89	1.129	0.175049	0.00174675	0.0270709	1430.22	3.13022				ITGB8	161.934	211.227	205.4	266.794	-1.20009	-0.263143	0.00204256	0.0300925	211.339	-3.08397
NUDT16	1330.55	1280.47	1211.66	1284.02	1.09334	0.128736	0.00177211	0.0273173	1276.67	3.12598				SDCCAG8	312.357	287.983	366.357	316.732	-1.15409	-0.206757	0.00204348	0.0300925	320.857	-3.08384
SETBP1	387.544	377.162	333.459	319.075	1.15605	0.209208	0.00178562	0.0274963	354.31	3.12375				COMMD7	373.615	364.42	420.371	396.941	-1.12191	-0.165953	0.00208523	0.0306089	388.837	-3.07782
HAND2	66.3853	68.9034	45.4578	51.4123	1.27277	0.347973	0.00178904	0.0275196	58.0397	3.12319				LPIN1	3961.48	3948.47	4268.99	4169.08	-1.08324	-0.115357	0.00213063	0.0311485	4087	-3.07139
RP11-443P15.2	212.907	289.414	171.797	211.482	1.19115	0.252353	0.00180298	0.0276466	221.4	3.1209				PIK3R3	91.4062	100.338	119.817	119.35	-1.23834	-0.308409	0.00213797	0.0312244	107.728	-3.07036
KIFAP3	734.665	743.076	660.458	697.095	1.1117	0.152762	0.00181359	0.0276506	708.824	3.11917				ACAD9	397.167	412.182	450.77	461.145	-1.12409	-0.168758	0.00217081	0.031608	430.316	-3.06581
LIMS2	1399.01	1444.43	1239.78	1326.15	1.14215	0.191755	0.00181479	0.0276506	1352.34	3.11898				FAM86HP	65.3089	61.6957	90.4755	65.6051	-1.25591	-0.328738	0.00217449	0.0316297	70.7713	-3.0653
PYGB	3296.3	2769.05	2914	2581.6	1.10759	0.147427	0.00182209	0.0277072	2890.24	3.1178				HNRNPH2	1071.91	1036.77	1174.74	1116.83	-1.09157	-0.126399	0.00218815	0.0317644	1100.06	-3.06343
MMP17	322.068	337.799	260.758	287.774	1.18537	0.24534	0.00189564	0.0286108	302.1	3.10611				CDCA7L	340.308	295.186	398.001	318.916	-1.14937	-0.200843	0.00220341	0.0318855	338.103	-3.06135
POLD4	507.827	374.22	414.056	382.012	1.19254	0.254038	0.00190031	0.0286256	419.529	3.10539				TMTC2	169.291	177.888	212.87	212.448	-1.20161	-0.264974	0.00225477	0.0325679	193.124	-3.05445
MARCH6	2558	2560.95	2387.25	2354.57	1.07194	0.10022	0.00191418	0.0287705	2465.19	3.10323				RAB22A	967.444	1041.21	1088.38	1116.15	-1.11375	-0.155424	0.00226201	0.0326399	1053.3	-3.05348
DBNDD2	349.544	359.498	305.698	327.904	1.15472	0.207541	0.0019274	0.0288985	335.661	3.1012				CFB	244.004	235.727	305.428	273.521	-1.18432	-0.244062	0.00228485	0.0329037	264.67	-3.05047
NOL3	297.953	292.567	250.17	273.131	1.16831	0.224417	0.0019287	0.0288985	278.455	3.101				SAR1A	2522.75	2451.68	2666.59	2608.53	-1.06324	-0.0884618	0.00228999	0.0329448	2562.39	-3.04979
TMEM25	342.494	264.027	290.955	243.173	1.15688	0.210236	0.00193681	0.02896	285.163	3.09975				TCHP	276.19	308.724	321.999	290.109	-1.14664	-0.197415	0.00230109	0.033041	299.256	-3.04834
CSRP1	2630.24	2582.78	2307.82	2213.81	1.11402	0.155775	0.00197669	0.0293897	2433.66	3.09371				RP11-426C22.4	44.9983	39.0805	65.473	54.9338	-1.26487	-0.338986	0.00233303	0.0334309	51.1214	-3.0442
AGL	435.419	459.663	373.587	396.944	1.15031	0.202026	0.00199754	0.0296531	416.403	3.0906				RP11-266K4.9	10.0148	10.5663	19.8883	15.2674	-1.2606	-0.33411	0.00233871	0.0334458	13.9342	-3.04346
MID1IP1	840.307	833.736	709.064	736.89	1.15652	0.209795	0.00202035	0.0298689	779.999	3.08722				LRRC8C	264.328	245.982	334.653	292.769	-1.20482	-0.268812	0.00237765	0.0338498	284.433	-3.03849
ANO6	2673.56	2850.02	2496.06	2652.16	1.07794	0.108277	0.00203925	0.0300925	2667.95	3.08446				PAQR5	116.107	108.722	153.636	140.118	-1.23817	-0.308214	0.00237464	0.0338498	129.646	-3.03887
STT3B	2253.73	2496.95	2096.78	2279.42	1.07835	0.108822	0.00204381	0.0300925	2281.72	3.08379				CCNG1	3535.97	3287.72	3815.61	3400.88	-1.07895	-0.109632	0.00240239	0.0341537	3510.04	-3.03537
TP53I13	340.446	331.903	287.519	310.931	1.16457	0.219803	0.0020697	0.0304427	317.7	3.08004				RP11-552F3.12	7.55339	12.4679	17.5769	8.18196	-1.10543	-0.144612	0.00249769	0.035331	11.445	-3.02362
AHR	1913.75	2224.39	1684.05	1924.59	1.13805	0.186563	0.00208318	0.0306089	1936.69	3.07811				MEG3	20117.8	19500.8	22919.9	20581.3	-1.11625	-0.15866	0.00256165	0.0359927	20780	-3.01596
ACE	1306.39	1310.17	1144.92	1134.29	1.14384	0.193882	0.00210467	0.0308628	1223.94	3.07505				UHRF2	765.261	789.8	860.484	855.619	-1.11825	-0.161249	0.00256027	0.0359927	817.791	-3.01613
ERLEC1	1351.37	1377.49	1206.74	1299.81	1.10386	0.142552	0.00211174	0.0309351	1308.85	3.07405				SH3PXD2A	4205.78	4144.53	4440.92	4606.97	-1.06691	-0.0934439	0.00259228	0.0363389	4349.55	-3.01236
TMEM144	68.501	82.1363	49.7134	60.5484	1.25258	0.324898	0.0021303	0.0311485	65.2248	3.07144				SMAD1	130.051	120.005	162.8	144.296	-1.19667	-0.259023	0.00259524	0.0363389	139.288	-3.01201
COMT	1986.71	1978.62	1768.8	1839.51	1.09988	0.137346	0.00214503	0.0312643	1893.41	3.06938				KLHL13	35.8871	33.5463	53.8748	41.0629	-1.27047	-0.345359	0.0026328	0.0367421	41.0928	-3.00765
IGF2R	6028.32	6434.02	5690.5	6043.2	1.07271	0.101264	0.00214476	0.0312643	6049.01	3.06942				IFI16	1490.25	1371.22	1654.19	1434.18	-1.10094	-0.138733	0.00266684	0.037074	1487.46	-3.00374
RP11-357C3.3	307.33	284.287	257.675	282.308	1.16764	0.223591	0.0021864	0.0317644	282.9	3.06367				SOCS5	820.285	803.632	923.676	827.076	-1.12065	-0.164342	0.00266674	0.037074	843.667	-3.00375
EFS	952.764	974.778	849.402	904.549	1.12125	0.165109	0.00219174	0.0317846	920.373	3.06294				H3F3AP4	394.046	398.6	447.131	409.591	-1.14174	-0.191232	0.00267289	0.0371224	412.342	-3.00305
SLC39A6	1943.57	2066.98	1791.65	1949.01	1.07952	0.110389	0.00219954	0.0318658	1937.8	3.06188				EFTUD2	690.807	712.457	773.104	719.442	-1.11323	-0.154754	0.00270326	0.0375081	723.953	-2.99961
ISL2	109.689	132.051	77.3898	73.6584	1.25268	0.325014	0.00220532	0.0318855	98.1969	3.06109				AJUBA	781.245	821.92	865.192	1009.99	-1.1061	-0.145487	0.0027112	0.0375461	869.588	-2.99872
CBLB	512.045	545.784	461.644	496.51	1.123	0.16736	0.00227288	0.032764	503.996	3.05204				SPRY2	374.803	343.079	478.898	441.296	-1.20916	-0.274001	0.00271945	0.0376243	409.519	-2.99779
MPC2	452.607	432.945	399.457	415.609	1.12964	0.175867	0.00230125	0.033041	425.155	3.04832				CNOT6	307.16	346.818	359.794	351.431	-1.15051	-0.20227	0.00273148	0.0377185	341.301	-2.99644
SPATA6	185.526	168.906	154.402	135.356	1.18262	0.241985	0.002327	0.0333775	161.048	3.04498				KCNK2	1167.55	1067.04	1365.48	1222.94	-1.13495	-0.18263	0.00274388	0.0378174	1205.75	-2.99506
SLC12A9	583.792	575.444	520.454	528.532	1.11059	0.151326	0.00233628	0.0334442	552.055	3.04378				GUCY1A2	309.008	495.629	363.315	599.86	-1.18813	-0.248696	0.00274863	0.0378467	441.953	-2.99454
FLNA	41883.2	44016.6	38322.1	41130.8	1.08248	0.114342	0.00235835	0.0336933	41338.2	3.04095				MALAT1	4357.71	4436.83	4924.02	4561.89	-1.11283	-0.154227	0.00277876	0.0381888	4570.11	-2.99121
APOE	78.9929	84.2107	48.4127	54.0509	1.26956	0.344327	0.00236632	0.0337738	66.4168	3.03993				DAAM1	195.212	199.326	233.667	220.89	-1.16285	-0.217662	0.00278489	0.0382366	212.274	-2.99054
AVIL	51.9515	38.4068	31.116	29.8986	1.28406	0.360708	0.00237867	0.0338498	37.8432	3.03836				PCNXL2	972.346	912.139	1110.12	996.674	-1.11492	-0.156943	0.00279244	0.038304	997.821	-2.98971
SYT1	112.925	116.642	72.9936	68.4941	1.26564	0.33987	0.00241121	0.0342454	92.7635	3.03427				INHBA	762.444	709.017	880.374	825.192	-1.16827	-0.22438	0.00284272	0.0388828	794.257	-2.98425
SIMC1	170.314	154.971	139.73	135.36	1.19062	0.251715	0.00242865	0.0344591	150.094	3.03209				CDKN2C	216.605	201.591	261.27	219.297	-1.16767	-0.223627	0.00285777	0.0390517	224.691	-2.98264
FER1L4	141.193	86.088	102.566	65.5017	1.2586	0.331816	0.00245971	0.0348656	98.8372	3.02825				GALNT5	1075.68	988.522	1159.85	1068.95	-1.1044	-0.143267	0.00288824	0.0393267	1073.25	-2.97939
SLC7A11	4395.6	4792.39	3856.68	4298.79	1.1092	0.149517	0.00248399	0.0351753	4335.86	3.02528				SLC43A3	227.438	237.061	279.506	277.196	-1.19105	-0.252233	0.00288879	0.0393267	255.3	-2.97933
FBLN5	6932.1	6707.58	6219.46	5943.92	1.10826	0.148296	0.00249988	0.035331	6450.77	3.02336				ZFP91	1946.51	1950.19	2126.36	2201.88	-1.09313	-0.128462	0.00288718	0.0393267	2056.23	-2.9795
EPHX1	2273.44	2446.02	2045.21	2269.09	1.10253	0.140821	0.00250345	0.0353468	2258.44	3.02292				SNN	418.394	459.165	480.469	515.571	-1.13327	-0.180488	0.00289935	0.0394333	468.4	-2.97821
TGFB1	1489.49	1372.38	1318.15	1288.38	1.11308	0.154553	0.00250866	0.0353859	1367.1	3.02229				MAP1LC3B	2039.09	2100.39	2177.97	2279.72	-1.07095	-0.0988976	0.00293736	0.039763	2149.29	-2.97422
TCEAL3	641.269	589.82	567.962	517.626	1.11373	0.155399	0.00252095	0.0355245	579.169	3.02082				DYNLT3	602.915	607.759	674.307	644.027	-1.11708	-0.159728	0.00294692	0.0398552	632.252	-2.97322
CTD-2369P2.2	430.042	395.977	367.655	364.991	1.16037	0.214581	0.00254658	0.0358506	389.666	3.01775				RDH5	182.509	219.023	221.543	234.127	-1.17877	-0.237283	0.00295262	0.0398948	214.301	-2.97263
FRY	682.027	802.396	565.485	664.07	1.1607	0.214994	0.00258909	0.0363389	678.495	3.01273				LRRN4CL	1177.44	1294.76	1359.32	1594.81	-1.14902	-0.2004	0.00296087	0.039969	1356.58	-2.97177
MSI2	545.475	512.266	475.354	442.338	1.14467	0.19493	0.00259636	0.0363389	493.858	3.01188				APCDD1L-AS1	57.5919	62.6556	74.4229	66.3407	-1.23277	-0.301903	0.00297659	0.0401437	65.2528	-2.97014
ADAMTSL5	567.165	599.237	502.425	589.221	1.13778	0.186219	0.00260892	0.0364794	564.512	3.01041				KIFC3	552.372	574.699	605.802	614.26	-1.10574	-0.145013	0.00301659	0.0406074	586.783	-2.96604
RTEL1-TNFRSF6B	262.754	193.874	200.944	171.384	1.23444	0.303856	0.00263127	0.0367421	207.239	3.00782				PDGFRA	7970.92	6779.21	8849.14	7544.22	-1.1099	-0.150431	0.00302586	0.0406564	7785.87	-2.9651
RABAC1	1272.93	1178.76	1098.48	1085.25	1.13117	0.17781	0.00265397	0.0369662	1158.85	3.00521				PFKFB3	443.506	440.973	513.697	520.447	-1.14066	-0.18987	0.00302504	0.0406564	479.656	-2.96518
RUNX2	117.089	89.4305	81.9462	57.984	1.25052	0.322532	0.00265362	0.0369662	86.6123	3.00525				PPIF	337.497	343.576	382.757	416.788	-1.13466	-0.182259	0.00304359	0.0408186	370.155	-2.9633
EIF3G	1778.16	1777.19	1648.7	1645.63	1.07379	0.102713	0.00270726	0.0375275	1712.42	2.99916				MAGT1	1192.38	1337.49	1285.51	1328.25	-1.07841	-0.108909	0.00305642	0.0409526	1285.9	-2.96201
JPH2	91.2151	117.531	64.9837	83.4387	1.2383	0.308366	0.00272346	0.0376437	89.2921	2.99734				MAB21L1	980.702	976.755	1087.55	990.991	-1.0987	-0.135801	0.00306944	0.041013	1009	-2.9607
TSKU	640.592	649.609	571.118	604.468	1.11222	0.153446	0.0027381	0.0377738	616.447	2.99571				YWHAQ	5333.31	5028.87	5736.14	5239.84	-1.07495	-0.104265	0.0030723	0.0410132	5334.54	-2.96041
SYNGR2	376.755	374.629	307.483	300.118	1.17288	0.230055	0.0027634	0.0380138	339.746	2.9929				TRIM25	1537.91	1495.57	1652.58	1545.09	-1.0868	-0.120093	0.00308634	0.0411246	1557.79	-2.95901
EML3	649.201	626.555	580.84	594.002	1.10741	0.147192	0.00280967	0.0385036	612.649	2.98783				RDH10	918.074	1244.14	1204.99	1620.65	-1.23172	-0.300676	0.00310395	0.041283	1246.96	-2.95725
COL15A1	1410.75	1134.47	1065.41	762.181	1.23605	0.305733	0.0028173	0.0385716	1093.2	2.987				IL4R	452.733	414.911	520.858	474.153	-1.14268	-0.192427	0.00314163	0.0416691	465.663	-2.95353
GBE1	2278.14	2539.34	2002.11	2096.25	1.11545	0.157621	0.00287001	0.0391819	2228.96	2.98133				TLK1	1004.7	1141.76	1117.04	1243.58	-1.1076	-0.147443	0.00315507	0.041809	1126.77	-2.95221
FZD6	721.528	648.693	622.045	587.303	1.11907	0.162299	0.00290525	0.0394764	644.892	2.97759				BCAT1	1666.19	1578.82	1865.4	1711.26	-1.09742	-0.134114	0.00318402	0.0421124	1705.42	-2.94939
IGFBP6	7920.96	6092.05	6989.99	5612.54	1.12607	0.171293	0.00291119	0.0394849	6653.89	2.97696				FGD6	103.483	85.0327	132.144	111.455	-1.21486	-0.280792	0.00318176	0.0421124	108.029	-2.94961
LONRF1	356.139	377.115	301.251	316.483	1.15265	0.20496	0.00291134	0.0394849	337.747	2.97695				UBE2F	666.731	677.89	734.838	739.162	-1.09594	-0.132168	0.00320122	0.0422655	704.655	-2.94772
CERS2	2220.58	2317.09	2060.61	2177.76	1.07219	0.100563	0.0029206	0.0395734	2194.01	2.97597				MAPT	58.3711	80.9562	80.4051	97.3851	-1.24082	-0.31129	0.0032167	0.0423923	79.2794	-2.94623
RNF38	482.77	515.135	430.44	456.3	1.11908	0.16231	0.00301232	0.0405876	471.161	2.96648				SPEN	1035.05	1071	1127.03	1160.25	-1.08234	-0.114158	0.00326355	0.0428924	1098.33	-2.94176
DOCK8	31.9026	32.2286	18.7051	19.13	1.25605	0.328893	0.00303844	0.0407874	25.4916	2.96382				ZMAT3	2828.89	3111.21	3081.33	3309.09	-1.09097	-0.125611	0.00328662	0.0431563	3082.63	-2.93958
CCND3	369.514	375.459	305.957	340.257	1.15488	0.207743	0.0030639	0.0410119	347.797	2.96125				FIG4	375.429	407.436	430.134	458.218	-1.13099	-0.177583	0.00340902	0.0445602	417.804	-2.92823
PPIL6	41.5658	43.1115	26.0451	29.6685	1.26226	0.336011	0.00306653	0.0410119	35.0977	2.96099				NBPF1	1657.8	1684.7	1848	1838.41	-1.09828	-0.135241	0.00342629	0.0446654	1757.23	-2.92665
C1orf86	542.927	518.532	464.453	489.638	1.1462	0.19686	0.0030762	0.0410274	503.887	2.96002				TMEM132B	110.724	118.463	154.818	179.103	-1.24046	-0.310873	0.00342606	0.0446654	140.777	-2.92668
DCN	46400.4	54475.6	44026.3	51284.3	1.08917	0.123225	0.00309844	0.0412478	49046.7	2.9578				CHRDL1	691.648	800.154	833.275	963.157	-1.16692	-0.2227	0.00343376	0.0447225	822.059	-2.92598
PRR15	25.4013	29.4706	12.2244	15.2957	1.24952	0.321372	0.0031222	0.0414876	20.598	2.95544				XPO7	1067.43	1107.36	1164.55	1179.24	-1.08743	-0.120918	0.00357924	0.0463356	1129.64	-2.91304
SRPRB	553.4	554.226	486.005	499.335	1.11598	0.158312	0.00314159	0.0416691	523.241	2.95353				AARS2	186.492	205.246	221.77	233.817	-1.16091	-0.215254	0.00359322	0.0463811	211.831	-2.91183
ABCD1	395.278	374.169	338.614	376.937	1.15214	0.204318	0.00318671	0.0421124	371.25	2.94913				DGKZ	837.441	837.011	923.361	940.566	-1.09729	-0.133951	0.00358976	0.0463811	884.595	-2.91213
ARHGAP18	778.905	779.74	690.991	691.093	1.12197	0.166033	0.00320814	0.0423182	735.182	2.94706				TNFAIP6	27.7102	32.3984	43.05	43.2975	-1.25723	-0.330253	0.00359224	0.0463811	36.614	-2.91191
CYB5R2	358.883	330.484	310.833	291.432	1.12986	0.176149	0.00322201	0.0424236	322.908	2.94572				COPS4	710.991	689.488	786.979	707.802	-1.10413	-0.142914	0.00361195	0.0465813	723.815	-2.9102
SH3PXD2B	1959.01	2095.15	1832.64	1972.03	1.10154	0.13952	0.00322668	0.0424464	1964.71	2.94527				YTHDF1	544.48	583.827	603.312	595.726	-1.10275	-0.1411	0.00367449	0.0473455	581.836	-2.90483
PIR	212.268	240.689	182.904	198.4	1.16766	0.223622	0.0033639	0.0441309	208.565	2.93237				NES	907.367	749.045	1139.89	922.531	-1.17545	-0.23321	0.00371292	0.047713	929.708	-2.90158
MID2	147.226	127.87	120.489	124.817	1.19142	0.252686	0.00338892	0.0443785	130.101	2.93006				SLC22A4	57.1601	54.9358	86.1072	75.0747	-1.25322	-0.325635	0.00371704	0.0477235	68.3194	-2.90123
RCAN3	211.576	177.811	173.535	159.47	1.1936	0.255321	0.0033881	0.0443785	180.598	2.93014				STAG1	1424.99	1547.4	1541.8	1644.1	-1.0799	-0.110894	0.00373614	0.0478441	1539.57	-2.89962
RASL11B	15.3643	13.0748	7.66176	6.18587	1.23574	0.305378	0.00339881	0.0444678	10.5717	2.92916				RFX2	245.825	252.263	294.374	287.498	-1.16434	-0.219511	0.00384136	0.049058	269.99	-2.8909
TSPAN11	130.392	126.198	97.2115	97.2882	1.24008	0.310429	0.00341205	0.0445602	112.772	2.92795				GPD2	518.923	479.571	581.895	540.683	-1.12057	-0.164229	0.00390359	0.0497209	530.268	-2.88585
F8A1	327.177	283.534	283.748	287.847	1.14872	0.200032	0.00348883	0.0453987	295.576	2.92102				RNF146	602.387	657.673	672.371	700.057	-1.10396	-0.14269	0.00391281	0.0497944	658.122	-2.88511
GDPD3	54.1534	51.8268	39.7894	47.9678	1.24705	0.318516	0.00352397	0.0458148	48.4343	2.9179				NHS	142.131	112.247	176.242	145.316	-1.18827	-0.248861	0.00392037	0.0498145	143.984	-2.8845
ANGPTL1	54.388	66.4206	36.9127	36.6324	1.24851	0.320205	0.00353722	0.0459457	48.5884	2.91673				PSMB3	436.826	453.823	485.484	447.286	-1.11478	-0.156764	0.00392767	0.0498485	455.855	-2.88391
PCGF5	926.721	979.374	832.887	881.632	1.11114	0.152039	0.00354086	0.0459516	905.154	2.91641				CLCA2	48.2976	51.7617	66.3254	67.414	-1.23802	-0.308038	0.0039411	0.0499222	58.4497	-2.88284
EIF1AX	1773.69	1901.51	1611.37	1697.9	1.09193	0.126883	0.00358007	0.0463356	1746.12	2.91297				RPL22L1	443.895	342.232	504.909	345.489	-1.13185	-0.178684	0.00394359	0.0499222	409.131	-2.88264
LPIN3	593.621	540.478	520.035	485.534	1.12798	0.173736	0.00357497	0.0463356	534.917	2.91342
IL20RB	567.171	614.112	501.599	505.267	1.12225	0.166393	0.00369651	0.0475869	547.037	2.90296
SMOC2	14.2815	31.2066	6.24282	17.5849	1.15899	0.212865	0.003711	0.047713	17.329	2.90174
RBM14-RBM4	31.046	15.8622	4.00047	22.0258	1.05017	0.0706281	0.00372725	0.0478121	18.2336	2.90037
REPS2	22.3079	24.6957	11.2362	9.45607	1.2261	0.294078	0.00373637	0.0478441	16.924	2.8996
DKK3	10673.9	10237.3	9652.11	9371.33	1.08423	0.116676	0.0037778	0.0483317	9983.65	2.89614
TNRC18	2384.91	2303.48	2122.23	2171.83	1.11443	0.15631	0.00383095	0.0489683	2245.61	2.89176
ZBTB47	1957.19	2027.48	1814.93	2063.4	1.06697	0.0935133	0.00386865	0.0493628	1965.75	2.88868
RRAS2	1524.53	1716.39	1386.33	1645.76	1.08547	0.118325	0.00387603	0.0494134	1568.25	2.88808
NDUFA4L2	139.549	142.238	108.158	134.96	1.21642	0.28264	0.00392129	0.0498145	131.226	2.88443
KIT	318.704	328.064	234.499	279.623	1.22233	0.289632	0.00393087	0.0498485	290.222	2.88366

## Sheet: GSF-F_72h_1
	GSF.F_DHT_48h mean	GSF.F_DHT_72h mean	GSF.F_EtOH_48h mean	GSF.F_EtOH_72h mean	FoldChange	log2FoldChange	pvalue	padj	Overall mean	stat
AOX1	2198.49	2356.67	983.524	962.964	2.32481	1.21711	1.64233e-126	2.30354e-122	1625.41	23.926
FAM107A	386.643	470.761	59.1724	79.7724	3.87364	1.95369	3.30872e-84	2.32041e-80	249.087	19.4435
APOD	1001.5	1246.56	316.031	352.076	2.8328	1.50223	8.22407e-65	3.84503e-61	729.043	16.9999
CAT	2388.96	2221.26	1444.11	1243.62	1.71138	0.775161	1.61247e-49	5.65411e-46	1824.49	14.7935
CERS6	750.648	895.315	357.541	388.172	2.10562	1.07425	3.74509e-49	1.05057e-45	597.919	14.7367
SULF1	9326.86	7341.7	6334.04	4273.03	1.77021	0.823925	4.57687e-40	1.06992e-36	6818.91	13.2489
ADAMTS1	7090.89	6720.91	4092.41	3677.72	1.74914	0.806644	6.64031e-39	1.33053e-35	5395.48	13.0467
PSMD8	1941.57	1952.45	1370.51	1467.18	1.32208	0.402815	1.31964e-36	2.31366e-33	1682.93	12.637
SAMHD1	899.338	833.142	428.939	443.816	1.73093	0.791549	7.57174e-36	1.18001e-32	651.309	12.4989
SLC12A2	1302.94	1436.17	813.721	876.645	1.56824	0.64915	1.01769e-35	1.42741e-32	1107.37	12.4753
MFAP4	1536.29	1502.17	2405.09	2534.78	-1.65069	-0.723069	1.14167e-35	1.45574e-32	1994.58	-12.4662
MYOCD	203.062	222.342	44.5982	31.0123	2.67957	1.422	1.47488e-35	1.72389e-32	125.254	12.4458
IMPA2	494.033	551.845	196.74	199.655	2.15335	1.10658	1.83778e-34	1.84119e-31	360.568	12.2427
REV3L	3863.13	3868.27	2856.15	2793.27	1.37588	0.460357	1.80557e-34	1.84119e-31	3345.2	12.2442
FAM105A	201.712	168.849	60.0178	42.5441	2.4691	1.30398	4.67532e-34	4.37174e-31	118.281	12.1667
SLC38A11	382.739	318.286	127.5	106.483	2.17854	1.12336	4.2653e-31	3.73907e-28	233.752	11.597
IDH1	3659.44	3490.46	2848.52	2684.9	1.2888	0.366025	5.55368e-31	4.32755e-28	3170.83	11.5744
PTPLB	878.854	1019.69	546.387	624.554	1.58094	0.660781	5.52454e-31	4.32755e-28	767.373	11.5749
FKBP5	148.517	138.255	38.4695	32.6139	2.43367	1.28313	1.21699e-30	8.98397e-28	89.4639	11.507
LITAF	2613.28	2613.3	3262.52	3262.13	-1.24502	-0.316164	8.24502e-29	5.78223e-26	2937.81	-11.1374
PRELP	2929.43	3452.36	4549.9	5681.15	-1.57727	-0.65743	1.59197e-28	1.06328e-25	4153.21	-11.0787
GLUL	5307.03	5171.03	3537.4	3295.9	1.4951	0.580246	1.83681e-27	1.17105e-24	4327.84	10.8575
RHOJ	621.129	810.071	989.693	1310.04	-1.56032	-0.641841	2.32912e-27	1.42036e-24	932.732	-10.8358
CD36	90.9401	127.811	222.034	322.866	-2.06058	-1.04305	3.1373e-27	1.83349e-24	190.913	-10.8085
STEAP4	522.861	575.611	21.953	16.7914	1.50998	0.594534	1.03602e-26	5.81249e-24	284.304	10.6984
SACS	1692.65	1560.75	2130.48	2152.82	-1.37223	-0.456521	2.75109e-25	1.48411e-22	1884.17	-10.3901
ERCC6	1425.13	1673.1	937.9	1096.35	1.48405	0.569536	6.48649e-25	3.36961e-22	1283.12	10.308
NID1	5376.16	4759.07	3991.32	3319.43	1.42923	0.515239	7.83336e-25	3.92395e-22	4361.49	10.2898
DIO2	159.399	161.334	47.2557	38.6181	2.23803	1.16223	1.69979e-24	8.22113e-22	101.652	10.2149
NR2F1	560.051	552.207	349.355	303.297	1.65221	0.724394	7.29643e-24	3.41132e-21	441.228	10.0727
IGFBP2	164.649	235.444	69.2276	86.5091	2.04337	1.03095	1.90224e-23	8.60672e-21	138.957	9.97802
CTB-167B5.2	33.8687	63.0036	1.96019	1.57679	2.52857	1.33832	3.72675e-23	1.63348e-20	25.1023	9.91106
PDLIM1	1174.07	956.48	773.781	615.895	1.51337	0.597766	4.19765e-23	1.78413e-20	880.056	9.89917
DKK1	13242.5	11720.5	9522.73	8157.43	1.40618	0.491779	1.05729e-22	4.36165e-20	10660.8	9.80634
ADCY3	1601.58	1701.18	1216.89	1201.19	1.37416	0.458547	3.2681e-22	1.30967e-19	1430.21	9.69177
IRS2	2286.58	2254.2	1493.96	1547.01	1.44414	0.530208	3.51586e-22	1.36982e-19	1895.44	9.68431
GALNT2	3989.04	3867.27	3229.02	3111.15	1.24195	0.312609	8.64662e-22	3.27777e-19	3549.12	9.59191
SORBS1	104.332	128.829	42.4675	42.1856	2.06248	1.04438	2.79891e-21	1.03309e-18	79.4536	9.46998
CILP	447.324	623.853	218.092	274.65	1.82834	0.870533	4.01479e-21	1.44388e-18	390.98	9.43223
CD82	622.218	599.888	407.014	371.082	1.56257	0.643924	1.31626e-20	4.61548e-18	500.051	9.30689
GCNT1	648.811	617.232	360.903	354.542	1.63699	0.711043	1.77258e-20	6.06397e-18	495.372	9.27522
NEXN	1588.04	1742.68	1059.76	1238.73	1.3874	0.47238	3.71987e-20	1.24226e-17	1407.3	9.19587
ENPP1	884.395	735.101	425.967	311.204	1.7812	0.832853	1.27147e-19	4.14734e-17	589.167	9.0628
ADCY4	251.898	232.052	378.071	412.853	-1.64067	-0.714282	2.37606e-19	7.57422e-17	318.718	-8.99436
HSD11B1	83.525	128.484	14.2142	28.4573	2.11465	1.08042	3.90742e-19	1.2179e-16	63.6702	8.93955
PRCP	2645.99	2684.23	2025.1	1929.77	1.36576	0.449708	4.276e-19	1.30381e-16	2321.27	8.92959
SMARCD2	985.553	911.786	761.507	702.841	1.28439	0.361088	5.4132e-19	1.61544e-16	840.422	8.90346
DRAM1	2322.41	2422.53	3040.09	3398.78	-1.3698	-0.453962	7.74603e-19	2.26345e-16	2795.95	-8.86362
PHLDB1	3361.58	3353.63	2766.05	2766.52	1.20253	0.266075	1.39073e-18	3.90128e-16	3061.95	8.79816
SOCS2	186.662	147.413	346.009	280.813	-1.69344	-0.759958	1.36373e-18	3.90128e-16	240.224	-8.80036
LINC00968	636.694	783.983	316.322	447.88	1.64631	0.719235	1.64451e-18	4.52273e-16	546.22	8.77933
CCDC68	88.6111	96.2733	17.2131	20.9674	1.98264	0.987424	3.56752e-18	9.6227e-16	55.7662	8.6918
SEPT11	13331.5	12609	15872.6	15473.2	-1.22549	-0.293361	5.44827e-18	1.44184e-15	14321.6	-8.64357
NID2	3324.57	2920.96	2302.57	2028.27	1.4114	0.497126	1.1027e-17	2.86417e-15	2644.09	8.56268
RGMB	2882.16	2823.82	4153.09	4124.56	-1.38395	-0.468794	2.58567e-17	6.59393e-15	3495.91	-8.46391
PTN	1547.12	1681.49	1211.41	1101.91	1.46635	0.552228	3.24272e-17	8.12186e-15	1385.48	8.43747
KIAA0922	236.408	195.932	393.078	339.687	-1.5999	-0.677985	5.48685e-17	1.35015e-14	291.276	-8.37576
CHST2	527.188	523.313	336.665	347.932	1.49189	0.577141	1.69856e-16	4.10758e-14	433.775	8.24165
MT2A	1469.25	946.715	898.086	548.861	1.58272	0.662403	2.69946e-16	6.41739e-14	965.728	8.18605
ABCA8	316.407	528.723	189.817	260.935	1.73745	0.796968	4.22288e-16	9.87169e-14	323.97	8.13199
NPTX1	258.474	242.818	589.508	659.708	-1.84876	-0.886561	4.37717e-16	1.00646e-13	437.627	-8.12764
ASPN	247.372	163.497	110.623	55.2545	1.8112	0.856945	5.4827e-16	1.24033e-13	144.187	8.10029
TMEM184C	929.372	950.083	697.921	711.048	1.31577	0.395904	1.21538e-15	2.70586e-13	822.106	8.00288
DPY19L4	1674.74	1771.92	1273.38	1362.69	1.28092	0.357186	2.05768e-15	4.50954e-13	1520.68	7.93782
NTN4	2729.27	3484.63	2131.75	2580.13	1.31007	0.389644	2.65399e-15	5.72689e-13	2731.44	7.90618
MYO1D	1230.49	1317.25	1770.22	1909.14	-1.39875	-0.484139	2.92764e-15	6.22168e-13	1556.77	-7.89395
F10	1457.81	1671.26	1034.76	1114.3	1.43996	0.526026	3.64221e-15	7.62471e-13	1319.53	7.86666
OMD	177.752	244.624	108.859	113.426	1.79163	0.841269	5.38229e-15	1.11018e-12	161.165	7.81764
PDGFD	376.255	671.84	240.374	337.162	1.71329	0.776771	6.01729e-15	1.22317e-12	406.408	7.80358
NABP1	1585.58	1684.09	1436.12	1271.48	1.29655	0.374675	6.73789e-15	1.35008e-12	1494.32	7.7893
NOV	1834.36	1926.46	2403.35	2623.36	-1.35931	-0.442876	7.58664e-15	1.47792e-12	2196.88	-7.7743
SNX18	1498.93	1576.52	1871.74	1945.02	-1.21496	-0.280909	7.5268e-15	1.47792e-12	1723.05	-7.7753
MMP1	1743.82	973.955	3548.64	2405.75	-1.75793	-0.813881	7.83143e-15	1.50471e-12	2168.04	-7.77028
DNAJB4	1041.32	1141.2	798.612	819.681	1.37453	0.458941	1.1847e-14	2.2455e-12	950.204	7.71768
GRIA1	416.667	540.684	257.875	343.817	1.53075	0.61424	1.70704e-14	3.19239e-12	389.761	7.67097
ZHX3	2461.94	2386.01	2014.58	2005.62	1.19485	0.256826	2.31207e-14	4.26699e-12	2217.04	7.63196
RGS2	320.787	249.299	179.282	116.01	1.69835	0.764131	2.97721e-14	5.42317e-12	216.344	7.59931
MAOA	159.006	171.397	64.3598	77.118	1.73772	0.797193	5.00488e-14	8.9998e-12	117.97	7.53179
TENM3	578.504	571.255	340.192	336.876	1.56775	0.648699	5.20379e-14	9.23904e-12	456.707	7.5267
L1CAM	187.171	185.974	284.33	289.666	-1.62673	-0.701976	6.31941e-14	1.10795e-11	236.785	-7.50129
CSDC2	310.76	222.487	469.992	367.836	-1.55828	-0.639959	7.51446e-14	1.30121e-11	342.769	-7.47855
ELFN2	374.96	331.613	553.599	507.03	-1.4607	-0.546663	9.34276e-14	1.59807e-11	441.801	-7.44988
S1PR1	152.875	146.464	69.795	68.5041	1.70591	0.770545	1.23671e-13	2.08989e-11	109.41	7.41279
COL8A1	1323.87	1199.36	981.975	803.407	1.40961	0.495295	1.77171e-13	2.95833e-11	1077.15	7.36498
CD302	682.551	804.914	533.313	606.574	1.30883	0.388279	1.80846e-13	2.98418e-11	656.838	7.36224
BMPER	424.71	409.185	563.99	576.201	-1.36637	-0.450351	2.48812e-13	4.05796e-11	493.522	-7.31955
STC1	155.517	102.45	360.811	205.598	-1.64955	-0.722069	2.83551e-13	4.57137e-11	206.094	-7.30199
KIF26B	405.433	354.222	190.53	157.56	1.67561	0.744684	3.04827e-13	4.85853e-11	276.936	7.29225
CDC37L1	312.727	323.084	216.071	212.751	1.44671	0.532779	3.45989e-13	5.45263e-11	266.158	7.27517
IL1R1	1835.75	1888.85	2433.05	2555.62	-1.34249	-0.424914	4.53325e-13	7.06481e-11	2178.32	-7.2386
PTK2B	205.263	226.12	150.45	133.306	1.55064	0.632862	4.76085e-13	7.33798e-11	178.785	7.23196
BMP2K	588.919	643.951	744.209	854.213	-1.29596	-0.374023	5.40716e-13	8.24357e-11	707.823	-7.21465
LAMB1	7033.74	5148.69	8528.72	6614.07	-1.29956	-0.378027	9.60099e-13	1.44799e-10	6831.31	-7.13611
THBS1	85621.6	80296.8	61254	60173.8	1.30039	0.37895	9.81062e-13	1.46387e-10	71836.5	7.13314
SFRP1	4225.11	4271.7	3675.86	3294.11	1.26428	0.338316	1.26606e-12	1.84976e-10	3866.7	7.09797
TCN2	511.291	524.582	335.892	353.221	1.43127	0.517296	1.25596e-12	1.84976e-10	431.247	7.09907
SQRDL	1126.29	1124.36	758.794	782.596	1.40156	0.487029	1.4365e-12	2.07716e-10	948.011	7.08049
STK24	2072.57	1943.7	1630.27	1453.82	1.3156	0.39572	1.46373e-12	2.09492e-10	1775.09	7.07788
NRP2	502.088	556.182	365.87	397.033	1.38828	0.473295	1.48652e-12	2.10605e-10	455.293	7.07574
COL7A1	2907.65	2594.1	2428.54	2026.2	1.26343	0.33735	1.60224e-12	2.2473e-10	2489.12	7.06534
IL6ST	10157.2	10604.3	11856	12507.3	-1.17926	-0.237883	1.63296e-12	2.26771e-10	11281.2	-7.0627
CASC10	336.243	394.132	280.216	274.542	1.39376	0.478985	1.75193e-12	2.40907e-10	321.283	7.05293
SAV1	1114.18	1014.46	894.921	820.77	1.22513	0.29294	2.01275e-12	2.74086e-10	961.081	7.0336
MXRA5	3087.71	2957.87	4150.29	4251.24	-1.37505	-0.459482	2.16405e-12	2.91855e-10	3611.78	-7.02348
METTL7A	440.176	442.476	344.672	290.581	1.43735	0.52341	2.53205e-12	3.35043e-10	379.476	7.00152
NR3C1	2239.85	2311.97	2676.2	2712.11	-1.16197	-0.216577	2.532e-12	3.35043e-10	2485.03	-7.00152
IGFBP4	18477.2	18755.6	21102.2	23459.3	-1.24698	-0.318434	3.07898e-12	4.03606e-10	20448.6	-6.97407
LMO4	725.056	670.143	536.477	510.739	1.28383	0.360454	3.2129e-12	4.1726e-10	610.604	6.96808
LTBP1	5121.11	4292.41	3894.99	3053.43	1.31677	0.397009	3.39252e-12	4.36546e-10	4090.48	6.96042
NFASC	1815.73	1541.55	2132.81	2018.46	-1.28142	-0.35774	3.46055e-12	4.41252e-10	1877.14	-6.95763
ABCA6	460.379	449.34	295.188	267.874	1.52485	0.608668	3.71124e-12	4.68954e-10	368.195	6.94776
NPR3	382.872	475.617	180.154	217.448	1.67322	0.742628	4.20479e-12	5.26575e-10	314.023	6.93012
IPO5	3817.97	3746.65	4419.67	4403.14	-1.17979	-0.238536	6.03044e-12	7.48522e-10	4096.85	-6.87893
LRRC32	842.465	821.591	1000.2	1070.82	-1.28421	-0.360881	6.09626e-12	7.50054e-10	933.77	-6.87738
CRISPLD2	167.448	125.536	76.9052	61.5544	1.62979	0.70469	6.59034e-12	8.03793e-10	107.861	6.86627
ATP1A2	71.2631	75.556	21.0212	25.0234	1.70652	0.771055	8.35838e-12	1.01064e-09	48.2159	6.83227
EEF2K	750.45	684.449	548.403	483.314	1.37486	0.459288	1.24701e-11	1.49492e-09	616.654	6.77466
ITGB5	4180.2	4269.35	3620.63	3563.5	1.20759	0.272135	1.39635e-11	1.65976e-09	3908.42	6.75828
ARHGAP17	1105.21	952.959	1279.94	1176.04	-1.21543	-0.281462	1.78848e-11	2.10801e-09	1128.54	-6.72232
ATP2B4	8537.28	8233.98	9909.08	9928.47	-1.19659	-0.25893	1.82747e-11	2.136e-09	9152.2	-6.71918
IRAK3	528.642	513.673	382.373	374.59	1.33593	0.417844	1.93712e-11	2.24546e-09	449.82	6.71069
PPAP2B	7842.95	9689.29	5981.49	7224.37	1.33592	0.417829	2.16078e-11	2.48419e-09	7684.52	6.69472
SNTB1	396.445	407.352	565.163	584.669	-1.39011	-0.475195	2.57367e-11	2.93482e-09	488.407	-6.66911
NEBL	64.3908	57.1221	14.8047	11.5766	1.61717	0.693469	2.62208e-11	2.96591e-09	36.9735	6.66637
NISCH	2932.99	2745.07	2335.61	2235.69	1.20938	0.274269	2.64945e-11	2.9729e-09	2562.34	6.66484
CFH	1215.44	1288.73	1043.81	923.046	1.33774	0.419797	3.44488e-11	3.83476e-09	1117.76	6.62618
LEPREL1	160.2	182.603	97.2877	96.6746	1.59235	0.671155	4.33458e-11	4.78715e-09	134.191	6.59217
RAB3B	3123.79	2639.25	3784.42	3388.79	-1.26193	-0.335627	5.04198e-11	5.5249e-09	3234.06	-6.56969
OXTR	921.867	881.169	686.259	607.234	1.41375	0.49953	5.71866e-11	6.21782e-09	774.132	6.55091
ITGB3	940.558	994.215	721.063	738.473	1.31686	0.3971	7.65727e-11	8.26161e-09	848.577	6.50718
HS6ST1	805.521	823.311	535.664	581.282	1.34827	0.431109	9.57252e-11	1.02492e-08	686.445	6.47355
SLC7A14	671.775	507.564	874.676	788.992	-1.47029	-0.556097	1.05698e-10	1.12312e-08	710.752	-6.45857
FZD7	1164.79	1024.66	1408.75	1316.01	-1.25927	-0.332583	1.12819e-10	1.18977e-08	1228.55	-6.44869
LRCH2	311.041	332.956	224.858	218.529	1.43246	0.518498	1.16274e-10	1.21706e-08	271.846	6.44412
AJUBA	781.245	821.92	865.192	1009.99	-1.23875	-0.308888	1.27041e-10	1.31991e-08	869.588	-6.43067
BACH1	1559.73	1508.04	2023.79	1928.69	-1.27012	-0.344963	1.29529e-10	1.32611e-08	1755.07	-6.42772
HGF	181.036	209.654	140.148	114.523	1.56596	0.647047	1.28946e-10	1.32611e-08	161.34	6.42841
CTSC	3434.18	3402.61	2659.9	2467.97	1.32002	0.40056	1.31697e-10	1.33853e-08	2991.17	6.4252
MAP2K3	857.771	800.431	1075.29	1059.42	-1.2818	-0.358172	1.40175e-10	1.41446e-08	948.229	-6.4157
SHROOM3	1254.88	1071.95	1651.55	1421.8	-1.29487	-0.372804	1.60889e-10	1.61188e-08	1350.04	-6.39467
ATP13A3	3021.13	3260.37	3622.57	3862.2	-1.1745	-0.232042	1.70345e-10	1.69451e-08	3441.57	-6.38594
ECM2	605.911	667.342	524.05	500.743	1.36644	0.450427	2.05856e-10	2.03334e-08	574.512	6.35691
RBBP8	334.315	389.305	253.314	268.557	1.3875	0.472491	2.42914e-10	2.38259e-08	311.373	6.33142
ABTB2	275.294	243.969	143.513	168.623	1.39639	0.481698	2.47548e-10	2.40763e-08	207.85	6.3285
RPS6KA2	3444.42	3585.38	2838.26	2899.85	1.24227	0.312976	2.48899e-10	2.40763e-08	3191.97	6.32766
LGMN	1824.75	1726.95	1426.4	1399.2	1.22439	0.292065	2.5388e-10	2.43899e-08	1594.33	6.32461
FLNB	2712.96	2933.71	2105.52	2174.07	1.3076	0.386921	3.39156e-10	3.23606e-08	2481.57	6.27973
POU2F2	227.986	243.47	329.193	356.602	-1.41524	-0.501046	4.25131e-10	4.02897e-08	289.313	-6.24451
PRSS23	7372.59	7168.1	6006.75	5653.89	1.27419	0.349577	4.3129e-10	4.05991e-08	6550.33	6.24226
ENTPD4	1408.38	1452.39	1205.36	1208.18	1.18429	0.244021	4.41015e-10	4.06952e-08	1318.58	6.23877
RAPGEF6	616.094	556.178	762.496	712.967	-1.25304	-0.325428	4.3847e-10	4.06952e-08	661.933	-6.23968
TNFRSF19	568	510.17	714.226	677.925	-1.32267	-0.403449	4.36776e-10	4.06952e-08	617.58	-6.24028
ROR1	656.089	587.02	472.992	467.076	1.24927	0.321081	4.66287e-10	4.27461e-08	545.794	6.23005
PLCL1	58.4886	79.6617	39.6294	36.6532	1.62624	0.701544	4.87098e-10	4.43639e-08	53.6082	6.22321
SAMD4A	1376.87	1520.04	1542.65	1777.87	-1.17421	-0.231689	5.78031e-10	5.23063e-08	1554.36	-6.19631
PDIA5	800.756	775.641	631.491	604.741	1.25306	0.325451	6.27665e-10	5.64336e-08	703.157	6.18332
CNTN3	290.324	236.919	391.174	341.426	-1.39155	-0.476693	6.37771e-10	5.69769e-08	314.961	-6.1808
SIX2	425.352	480.707	265.128	338.669	1.44392	0.529993	6.82559e-10	6.05922e-08	377.464	6.17008
CNN3	2979.57	2925.88	2395.12	2414.86	1.19733	0.259826	7.08045e-10	6.24081e-08	2678.86	6.16428
MARCH4	1074.9	1065.14	1290.95	1409.02	-1.29598	-0.374041	7.11913e-10	6.24081e-08	1210	-6.16342
PKDCC	179.488	183.862	99.1446	103.24	1.5429	0.625646	7.46176e-10	6.50054e-08	141.434	6.15597
RASL11A	73.7897	53.1242	27.129	20.636	1.61049	0.687497	8.76771e-10	7.5911e-08	43.6697	6.13037
PTGS1	5032.45	4186.08	3945.62	3170.21	1.27813	0.354031	8.84232e-10	7.60873e-08	4083.59	6.12902
ARL4C	584.958	612.087	711.439	808.264	-1.25182	-0.324025	9.2071e-10	7.87432e-08	679.187	-6.12258
WLS	2050.41	2025.59	2481.22	2385.09	-1.18158	-0.240719	9.71327e-10	8.25687e-08	2235.58	-6.11405
TMEM109	1630.52	1851.34	1261.64	1532.79	1.20916	0.274005	1.01749e-09	8.59722e-08	1569.07	6.10664
OGN	496.234	393.471	374.113	264.651	1.48577	0.571215	1.12722e-09	9.46731e-08	382.117	6.09027
EPB41L2	2867.88	2747.76	3406	3276.61	-1.17621	-0.234143	1.46095e-09	1.21972e-07	3074.56	-6.04862
TP53I11	749.762	758.782	914.631	973.144	-1.27206	-0.347164	1.48793e-09	1.2349e-07	849.08	-6.04567
LY96	83.66	81.9483	127.369	144.428	-1.51994	-0.604014	1.53375e-09	1.26544e-07	109.351	-6.04078
FAM20B	3854.4	4256.14	3150.78	3528.89	1.20845	0.273154	1.94262e-09	1.5934e-07	3697.55	6.00253
ATP1A1	5631.43	5504.55	4625.23	4597.36	1.18196	0.241185	2.02249e-09	1.64927e-07	5089.64	5.99599
RCAN2	487.36	487.767	700.395	701.313	-1.33829	-0.420394	2.04129e-09	1.65498e-07	594.209	-5.99449
NREP	962.695	832.75	1353.02	1182.36	-1.34097	-0.423275	2.08722e-09	1.68249e-07	1082.71	-5.99087
GLRX	1313.24	1196.12	956.342	898.699	1.29056	0.367992	2.12978e-09	1.70699e-07	1091.1	5.98759
DUSP4	51.3898	50.6928	91.1409	97.5915	-1.55111	-0.633305	2.45707e-09	1.95812e-07	72.7037	-5.96429
PLAU	1033.98	791.178	1302.37	1108.53	-1.34161	-0.423961	2.5411e-09	2.01364e-07	1059.01	-5.95879
MVP	3549.13	3234.96	3957.31	3625.67	-1.11687	-0.159468	2.71064e-09	2.13592e-07	3591.77	-5.94823
SH3BGRL3	8806.11	7584.77	9880.17	9323.36	-1.2083	-0.272975	3.14175e-09	2.4618e-07	8898.61	-5.92401
MAMLD1	515.732	594.73	710.847	850.04	-1.36086	-0.444518	3.68215e-09	2.86921e-07	667.837	-5.89787
APRT	629.78	637.598	493.421	476.143	1.31263	0.392462	3.82317e-09	2.96264e-07	559.236	5.89167
SSB	1163.05	1202.52	1017.61	1006.31	1.18358	0.24316	4.00224e-09	3.08437e-07	1097.37	5.8841
AKAP12	11613	10144.1	14044.1	12547.5	-1.20328	-0.266973	4.07109e-09	3.12028e-07	12087.2	-5.88128
GPM6B	318.774	280.746	202.713	151.14	1.51022	0.594758	4.17365e-09	3.1815e-07	238.343	5.87716
SORT1	673.619	779.667	507.044	574.259	1.32096	0.401585	4.24169e-09	3.21589e-07	633.647	5.87448
ERRFI1	953.504	888.467	745.018	658.384	1.30227	0.381032	4.64319e-09	3.50137e-07	811.343	5.85948
STON1	1204.64	1194.8	813.443	817.641	1.37997	0.464642	4.96631e-09	3.725e-07	1007.63	5.8483
PDZRN3	1799.32	1770.78	1306.25	1297.97	1.30642	0.385613	5.70959e-09	4.25972e-07	1543.58	5.82505
PKP4	699.503	844.706	899.055	1092.41	-1.26127	-0.334882	6.50058e-09	4.82419e-07	883.919	-5.80334
DAPK1	581.364	673.678	397.04	495.378	1.34289	0.42534	6.83197e-09	5.04343e-07	536.865	5.795
DCLK1	545.809	508.64	402.145	362.258	1.37791	0.462478	6.88833e-09	5.05841e-07	454.713	5.79362
KCNIP3	326.285	336.185	214.184	242.333	1.34334	0.42582	7.29557e-09	5.32957e-07	279.747	5.78398
PPP3CA	1241.14	1156.06	967.761	947.286	1.20193	0.265356	7.59464e-09	5.5193e-07	1078.06	5.77722
AFAP1L1	234.721	290.522	160.828	192.43	1.43163	0.517658	8.35925e-09	6.04365e-07	219.625	5.76105
KIF23	199.142	160.376	259.222	229.437	-1.36333	-0.447137	9.0141e-09	6.48368e-07	212.044	-5.74831
PTPN13	2985.88	2979.79	3395.72	3363.34	-1.12956	-0.175761	1.05656e-08	7.56085e-07	3181.18	-5.72139
SCARA5	284.183	316.965	240.42	197.902	1.43575	0.521803	1.14526e-08	8.11282e-07	259.867	5.70768
SMARCA1	1353.14	1210.62	1481.86	1424.35	-1.17076	-0.227449	1.14374e-08	8.11282e-07	1367.49	-5.70791
SEC14L2	205.266	167.701	117.558	100.027	1.44921	0.535268	1.31156e-08	9.2442e-07	147.638	5.68455
NCS1	1081.95	1082.52	1218.03	1271.95	-1.15969	-0.21374	1.33856e-08	9.3873e-07	1163.61	-5.68107
B3GALT2	40.0083	53.0479	20.1367	15.7493	1.57244	0.653006	1.41084e-08	9.84501e-07	32.2356	5.67207
PKIG	763.829	683.566	956.621	882.384	-1.25184	-0.324056	1.6738e-08	1.15649e-06	821.6	-5.64272
UNC13B	697.486	811.752	849.191	978.59	-1.2028	-0.266403	1.67077e-08	1.15649e-06	834.254	-5.64304
DNM1	1097.03	935.578	1487.04	1244.39	-1.31528	-0.39537	1.72447e-08	1.18566e-06	1191.01	-5.63759
SUN2	1806.25	1845.15	1479.05	1551.27	1.19778	0.260364	1.76395e-08	1.20688e-06	1670.43	5.63369
SH3RF3	316.534	334.362	245.951	238.7	1.33728	0.419307	1.78358e-08	1.21439e-06	283.887	5.63178
TACC1	2051.28	2115.16	1606.69	1628.15	1.26391	0.337898	1.79961e-08	1.21939e-06	1850.32	5.63024
ARL6IP5	3411.16	3532.42	3074.34	3080.79	1.14169	0.19117	2.02439e-08	1.3651e-06	3274.68	5.6099
TPBG	1703.08	1723.86	1928.72	2111.06	-1.2	-0.263029	2.45231e-08	1.64575e-06	1866.68	-5.57662
JAK1	3347.58	3038.72	3741.8	3469.76	-1.13225	-0.179196	2.46917e-08	1.64917e-06	3399.46	-5.57543
LOX	34990.2	36409	29683.5	29924.9	1.20912	0.273958	2.57714e-08	1.71312e-06	32751.9	5.56798
PAM	9065.2	8779.93	10328.6	10221.1	-1.16506	-0.2204	2.60171e-08	1.7213e-06	9598.71	-5.56632
TMEM158	222.009	186.025	344.631	319.299	-1.41247	-0.498217	2.70561e-08	1.78164e-06	267.991	-5.55949
XYLT1	1011.39	903.837	786.695	736.009	1.2061	0.270355	2.73645e-08	1.79353e-06	859.484	5.55751
MLTK	2252.25	2130.76	2640.56	2543.85	-1.18485	-0.244708	2.84057e-08	1.85311e-06	2391.85	-5.55099
IL20RB	567.171	614.112	501.599	505.267	1.24472	0.315825	3.01674e-08	1.94553e-06	547.037	5.54046
SLC1A5	4022.08	4340.39	3217.52	3479.28	1.22412	0.291739	3.02385e-08	1.94553e-06	3764.82	5.54005
SYBU	97.591	83.6741	66.2634	49.5368	1.48614	0.571567	3.02103e-08	1.94553e-06	74.2663	5.54021
MRC2	13449.2	12026.1	11796.7	10241.6	1.17139	0.228225	3.49454e-08	2.2381e-06	11878.4	5.51466
ARID5A	458.741	497.765	626.814	693.401	-1.33999	-0.422218	3.56633e-08	2.27233e-06	569.18	-5.51108
TMEM200A	583.433	520.519	733.659	695.737	-1.30975	-0.389288	3.58039e-08	2.27233e-06	633.337	-5.51039
DPP4	5012.51	5401.08	5978.8	7011.97	-1.26444	-0.338504	4.21963e-08	2.66597e-06	5851.09	-5.4814
DPYSL3	3199.92	3250.2	3737.04	3881.92	-1.19025	-0.251269	4.4862e-08	2.80908e-06	3517.27	-5.47056
DSEL	1634.78	1754.58	2025.88	2040.09	-1.15591	-0.209029	4.47135e-08	2.80908e-06	1863.83	-5.47115
ENTPD6	953.89	961.746	804.441	808.316	1.17917	0.237776	4.58107e-08	2.85574e-06	882.098	5.46685
NRP1	3992.45	3518.84	3273.03	2840.83	1.22015	0.287063	4.79996e-08	2.97895e-06	3406.29	5.45857
EREG	155.638	156.091	226.4	229.176	-1.41648	-0.502306	5.19768e-08	3.21157e-06	191.826	-5.44441
PEMT	255.883	264.108	184.676	182.625	1.35925	0.442814	5.36472e-08	3.30025e-06	221.823	5.43878
ITGA5	6360.83	5851.29	5507.34	5114.59	1.136	0.183961	5.7292e-08	3.50586e-06	5708.51	5.42705
PRKAG2	266.212	277.207	211.329	202.251	1.31587	0.396017	5.74894e-08	3.50586e-06	239.25	5.42644
HUNK	50.3267	52.093	104.725	101.445	-1.51861	-0.602756	5.98436e-08	3.63362e-06	77.1473	-5.41927
RGCC	494.954	451.966	214	195.172	1.53946	0.622428	6.07593e-08	3.6638e-06	339.023	5.41655
TRIM2	1838.11	1872.31	2153.55	2231.83	-1.18874	-0.249438	6.08631e-08	3.6638e-06	2023.95	-5.41625
SLC35A3	458.862	531.334	371.459	416.2	1.25227	0.324542	6.54472e-08	3.92292e-06	444.464	5.40324
ENPP2	3158.57	2661.53	3676.6	3277.8	-1.24727	-0.318769	6.93189e-08	4.13674e-06	3193.63	-5.39293
TCF7	394.239	271.315	517.959	385.616	-1.35637	-0.439746	6.96043e-08	4.13674e-06	392.282	-5.39219
CPM	52.6591	51.9262	116.886	110.178	-1.52568	-0.609454	7.35682e-08	4.31744e-06	82.9121	-5.38223
FBN2	8634.81	8997.43	6468.88	7066.68	1.24345	0.314352	7.33244e-08	4.31744e-06	7791.95	5.38283
RNF24	1584.88	1499.68	1181.42	1163.5	1.25147	0.323618	7.34582e-08	4.31744e-06	1357.37	5.3825
SVIL	3602.81	3788	4243.45	4484.27	-1.18663	-0.246871	8.72892e-08	5.10133e-06	4029.63	-5.35137
STK32B	489.056	507.213	579.311	678.543	-1.29618	-0.374262	9.27643e-08	5.3988e-06	563.531	-5.34036
COL5A2	13051.7	10890.3	11227.5	9459.5	1.15803	0.211676	9.63467e-08	5.58412e-06	11157.3	5.33348
MAPRE2	552.484	504.477	745.525	664.856	-1.28713	-0.364152	9.81718e-08	5.66649e-06	616.836	-5.33008
ACKR3	443.027	486.074	303.073	332.891	1.39838	0.48376	1.16177e-07	6.67828e-06	391.266	5.29941
PTDSS1	1302.33	1351.1	1536.81	1687.52	-1.22352	-0.291041	1.26565e-07	7.24571e-06	1469.44	-5.28375
PAPSS2	2256.41	2193.21	2618.55	2499.53	-1.13927	-0.188113	1.36304e-07	7.77156e-06	2391.92	-5.27016
AKAP6	14.2095	9.73554	25.1479	32.212	-1.48597	-0.571408	1.39888e-07	7.9436e-06	20.3262	-5.2654
RGL1	789.691	804.014	880.792	998.743	-1.22314	-0.290586	1.46954e-07	8.31122e-06	868.31	-5.25634
ANK1	327.902	279.807	413.905	390.878	-1.33087	-0.412373	1.56416e-07	8.81079e-06	353.123	-5.24484
LRRC15	639.278	442.693	760.727	636.635	-1.36835	-0.452439	1.6694e-07	9.32868e-06	619.833	-5.23282
UACA	2511.42	2049.77	3153.17	2366.51	-1.15639	-0.209628	1.66918e-07	9.32868e-06	2520.22	-5.23285
ISL2	109.689	132.051	77.3898	73.6584	1.47802	0.563666	1.72878e-07	9.62218e-06	98.1969	5.22636
NEGR1	1059.97	1478.96	860.536	1180.36	1.22251	0.289843	1.80562e-07	1.00101e-05	1144.95	5.21831
NR2F1-AS1	295.297	304.523	227.967	207.387	1.3625	0.446257	1.83776e-07	1.01482e-05	258.793	5.21504
ITPR1	142.986	159.084	95.1277	97.8004	1.44203	0.528105	1.91008e-07	1.05062e-05	123.75	5.20788
FGD4	570.013	614.897	452.676	490.906	1.2497	0.321586	1.98547e-07	1.08782e-05	532.123	5.20069
DOCK1	2253.95	2241.75	2514.08	2533.59	-1.12284	-0.167154	2.05116e-07	1.11944e-05	2385.84	-5.19464
ARHGAP1	2535.76	2254.11	2702.53	2645.04	-1.15113	-0.203048	2.06518e-07	1.12234e-05	2534.36	-5.19337
ENC1	153.358	147.289	222.37	239.113	-1.4196	-0.505488	2.07249e-07	1.12234e-05	190.532	-5.19272
CNTNAP1	999.672	826.4	1049.53	977.038	-1.17331	-0.23058	2.18144e-07	1.1768e-05	963.161	-5.18317
HPS5	576.628	644.168	414.996	472.857	1.28258	0.359051	2.19809e-07	1.17765e-05	527.163	5.18175
PRSS12	3532.2	3915.29	3131.06	3235.29	1.19432	0.256187	2.20659e-07	1.17765e-05	3453.46	5.18103
STC2	7539.35	8294.72	5941.69	6669.09	1.22334	0.290828	2.20821e-07	1.17765e-05	7111.21	5.1809
TBC1D8	503.649	426.475	638.995	561.521	-1.30386	-0.382788	2.33797e-07	1.24214e-05	532.66	-5.17024
TYRO3	530.195	568.116	420.664	434.426	1.26347	0.337396	2.49343e-07	1.31973e-05	488.35	5.15819
ANXA2	27190.8	23883.4	24198.4	21716.8	1.08634	0.119472	2.62276e-07	1.37977e-05	24247.3	5.14872
MBNL1	3533.48	3566.39	3190.22	3223.72	1.10954	0.14996	2.62655e-07	1.37977e-05	3378.45	5.14845
CYP1B1	5302.77	6777.78	4301.73	5232.92	1.30824	0.387624	2.70208e-07	1.41415e-05	5403.8	5.14312
EPB41L3	1161.14	1075.67	1391.65	1308.03	-1.21745	-0.283866	2.89304e-07	1.50847e-05	1234.12	-5.13028
ITGA4	1413.51	1372.68	1018.28	1051.84	1.26018	0.333627	2.90605e-07	1.50964e-05	1214.08	5.12944
BAALC	248.623	177.881	375.565	291.08	-1.42524	-0.5112	3.02437e-07	1.56531e-05	273.287	-5.12192
SH3PXD2A	4205.78	4144.53	4440.92	4606.97	-1.11682	-0.159393	3.0726e-07	1.58442e-05	4349.55	-5.11894
RP11-253M7.1	52.7067	46.4268	76.296	80.8594	-1.45792	-0.543909	3.22957e-07	1.65926e-05	64.0722	-5.10953
FAM198B	1521.14	1903.68	948.828	1270.84	1.39424	0.479475	3.38591e-07	1.73324e-05	1411.12	5.10059
STIM1	1531.96	1450.84	1211.23	1200.31	1.20221	0.265692	3.47627e-07	1.77302e-05	1348.59	5.09561
COL3A1	62796.9	44450.4	45216.3	33154.3	1.29829	0.376615	3.51825e-07	1.78793e-05	46404.5	5.09333
FOXO1	159.795	195.676	117.546	132.435	1.38796	0.472962	3.5618e-07	1.80353e-05	151.363	5.091
RP11-443P15.2	212.907	289.414	171.797	211.482	1.32397	0.40487	4.06383e-07	2.05033e-05	221.4	5.06594
OR7E47P	22.6983	28.3734	6.64644	7.43503	1.4475	0.533559	4.14766e-07	2.08513e-05	16.2883	5.06205
CDH11	2607.9	2379.24	3027.7	2817.61	-1.17844	-0.236874	4.29763e-07	2.14514e-05	2708.11	-5.05528
FSTL1	35371.7	36432.8	30599.5	30854.2	1.18051	0.239411	4.2884e-07	2.14514e-05	33314.6	5.05569
NQO1	6948.77	7667.81	5763.67	5971.75	1.23837	0.308442	4.33254e-07	2.1549e-05	6588	5.05373
PRICKLE2	639.644	588.043	484.066	446.62	1.26709	0.341517	4.42727e-07	2.19424e-05	539.593	5.0496
DSP	1148.02	1117.61	931.963	921.706	1.19126	0.252484	4.4886e-07	2.2168e-05	1029.82	5.04698
FST	7108.87	6780.64	8002.29	8751.77	-1.22887	-0.297334	4.56105e-07	2.24468e-05	7660.89	-5.04391
GBE1	2278.14	2539.34	2002.11	2096.25	1.20253	0.266072	4.59788e-07	2.25489e-05	2228.96	5.04238
FN1	401254	393147	344655	328292	1.20666	0.271019	4.69701e-07	2.29548e-05	366837	5.03829
CSRP2	200.64	192.497	286.193	282.085	-1.35167	-0.434748	5.29275e-07	2.57764e-05	240.354	-5.01538
AP2M1	5415.74	5093.75	5866.51	5639.05	-1.10472	-0.143682	5.31597e-07	2.57999e-05	5503.76	-5.01454
TNPO1	5328.75	5706.75	4756.88	5047.61	1.12782	0.173538	5.39775e-07	2.61065e-05	5210	5.01161
CDKL1	166.815	149.986	103.942	103.569	1.3631	0.446887	5.54944e-07	2.67479e-05	131.078	5.00627
HLX	123.332	143.713	77.5776	93.2938	1.41263	0.498384	5.70896e-07	2.74226e-05	109.479	5.00081
SPHK1	219.272	160.038	257.967	238.525	-1.34935	-0.432259	6.08926e-07	2.91495e-05	218.951	-4.98836
S1PR3	1665.32	1700.02	1914.35	2060.25	-1.22181	-0.289024	6.30349e-07	3.00723e-05	1834.99	-4.98168
ITPKB	217.981	238.31	293.154	323.459	-1.31517	-0.395252	6.63142e-07	3.11291e-05	268.226	-4.97186
MAP3K5	139.059	127.203	201.923	181.657	-1.36009	-0.443705	6.58663e-07	3.11291e-05	162.461	-4.97317
MBNL2	921.025	889.606	699.465	710.929	1.23279	0.301932	6.59379e-07	3.11291e-05	805.256	4.97296
TBC1D16	2052.36	1899.48	1715.32	1656.06	1.14442	0.194617	6.63596e-07	3.11291e-05	1830.81	4.97173
TFPI	2036.43	2163.86	1815.29	1948.32	1.11283	0.154229	6.62576e-07	3.11291e-05	1990.97	4.97202
VWF	61.4077	51.2197	93.8512	88.7181	-1.44583	-0.5319	6.71266e-07	3.13839e-05	73.7992	-4.9695
LPPR4	126.483	160.258	192.87	242.223	-1.38032	-0.465002	7.08582e-07	3.30185e-05	180.459	-4.959
AC026703.1	106.588	131.821	42.7859	49.4192	1.49344	0.578641	7.10966e-07	3.30199e-05	82.6536	4.95834
NLRP1	999.383	957.174	1218.16	1144.64	-1.18177	-0.240946	7.14037e-07	3.30531e-05	1079.84	-4.95751
SIPA1L1	1173.99	1089.09	1349.17	1313.41	-1.19637	-0.25867	7.18476e-07	3.31492e-05	1231.42	-4.9563
MYO10	1112.32	944.487	1428.78	1217.65	-1.26866	-0.343307	7.33046e-07	3.37105e-05	1175.81	-4.9524
PDE1A	231.28	221.206	171.583	155.067	1.36939	0.45353	7.4089e-07	3.39599e-05	194.784	4.95033
TMEM64	408.091	376.086	264.5	270.277	1.32152	0.402198	7.45227e-07	3.40474e-05	329.739	4.94919
SLC16A2	976.972	862.06	1158.14	1075.19	-1.20991	-0.274902	7.6315e-07	3.47531e-05	1018.09	-4.94456
NFATC4	3451.42	3619.01	4104.02	4307.53	-1.20252	-0.266066	7.81684e-07	3.54819e-05	3870.5	-4.93989
FABP3	4875.89	5145.19	5885.65	6509.72	-1.24576	-0.317021	8.03239e-07	3.63427e-05	5604.11	-4.93458
PRPS1	341.092	312.606	454.139	420.471	-1.29026	-0.367658	8.06646e-07	3.63795e-05	382.077	-4.93375
TMEM173	751.518	724.614	954.756	942.708	-1.27166	-0.346711	8.10564e-07	3.6439e-05	843.399	-4.93281
RAB31	1448.04	1455.18	1727.01	1806.39	-1.20071	-0.263891	8.31596e-07	3.72651e-05	1609.16	-4.9278
NYNRIN	2106.67	2106.41	2506.4	2590.68	-1.21873	-0.285382	8.6341e-07	3.85675e-05	2327.54	-4.92046
GPSM2	673.478	659.778	834.132	803.82	-1.22562	-0.293517	9.07129e-07	4.03917e-05	742.802	-4.91078
C8orf4	148.9	113.023	114.888	62.5536	1.43374	0.519786	9.14794e-07	4.06041e-05	109.841	4.90913
SBF2-AS1	313.484	293.034	450.831	396.513	-1.29158	-0.36914	1.02061e-06	4.51578e-05	363.465	-4.88762
FGF13	68.3296	64.6359	119.338	106.652	-1.42555	-0.511516	1.04467e-06	4.60772e-05	89.7388	-4.88303
ATP8B1	1530.49	1589.39	1784.53	1830.03	-1.14524	-0.195654	1.20613e-06	5.30317e-05	1683.61	-4.85463
NIPAL3	2461.12	2454.46	1975.46	2041.58	1.21583	0.281943	1.22999e-06	5.3912e-05	2233.15	4.85074
PLEKHA5	749.548	733.289	580.424	578.079	1.23417	0.303536	1.23875e-06	5.4127e-05	660.335	4.84934
NT5DC2	1564.71	1293.21	1199.49	1050.87	1.20732	0.271813	1.27973e-06	5.55711e-05	1277.07	4.84288
TMEM237	800.654	833.482	665.25	688.261	1.19823	0.260906	1.27582e-06	5.55711e-05	746.912	4.84348
LINC00341	374.242	313.842	449.02	402.356	-1.24806	-0.319685	1.29406e-06	5.60198e-05	384.865	-4.84066
RABGAP1	1638.2	1819.31	1400.43	1551.15	1.17138	0.228206	1.32803e-06	5.73136e-05	1602.27	4.83551
PAPSS1	1232.25	1175.69	1081.74	1021.94	1.14001	0.189047	1.41253e-06	6.07735e-05	1127.91	4.82323
MAP3K7CL	117.09	153.928	171.315	210.315	-1.30971	-0.389248	1.42491e-06	6.11186e-05	163.162	-4.82149
NT5E	6518.54	6106.01	5767.83	5261.91	1.17241	0.229471	1.43746e-06	6.14689e-05	5913.57	4.81974
SNX30	632.273	566.209	736.659	678.625	-1.1848	-0.244647	1.45467e-06	6.2016e-05	653.441	-4.81736
DNAJC13	2373.87	2554.4	2644.48	2885.92	-1.12333	-0.167785	1.5413e-06	6.55101e-05	2614.67	-4.8058
SGMS2	1509.97	1580.28	1286.22	1323.53	1.19976	0.262744	1.55675e-06	6.59666e-05	1425	4.80381
QPRT	1763.08	1429.78	1816.24	1700.09	-1.17675	-0.23481	1.614e-06	6.81864e-05	1677.3	-4.79658
WDR26	2264.33	2232.92	2548.56	2518.02	-1.11977	-0.163199	1.69751e-06	7.14992e-05	2390.96	-4.78646
SNED1	919.073	713.471	718.479	551.277	1.24502	0.316173	1.72489e-06	7.24352e-05	725.575	4.78324
TSC22D3	804.227	933.743	641.189	727.953	1.2638	0.337763	1.76258e-06	7.3797e-05	776.778	4.7789
MFSD6	722.391	696.421	594.843	568.635	1.23201	0.301015	1.91063e-06	7.97574e-05	645.573	4.76265
CHST3	1237.32	1330.72	1049.48	1092.14	1.20544	0.269556	1.92429e-06	7.98521e-05	1177.42	4.76122
SERPINB7	125.885	74.2927	187.302	126.508	-1.4212	-0.507113	1.92348e-06	7.98521e-05	128.497	-4.7613
MPZL1	2648.15	2680.27	2205.61	2273.62	1.16011	0.214263	1.9616e-06	8.11604e-05	2451.91	4.75734
LAMC1	24593.3	23874.1	21495.4	20883.9	1.13869	0.187377	1.97361e-06	8.11787e-05	22711.7	4.75611
SELENBP1	558.192	463.202	681.619	584.465	-1.23527	-0.304821	1.97055e-06	8.11787e-05	571.869	-4.75642
ABLIM3	1982.07	1909.21	1642.2	1555.17	1.20142	0.264743	2.09772e-06	8.59871e-05	1772.16	4.74377
SLC44A2	4240.85	4608.9	3813.01	4122.56	1.11897	0.16217	2.10278e-06	8.59871e-05	4196.33	4.74329
USP53	4489.24	5424.42	5424.56	6556.02	-1.20233	-0.265836	2.11295e-06	8.61518e-05	5473.56	-4.74231
PTEN	1813.89	1601.72	2082.23	1868	-1.15992	-0.214023	2.15755e-06	8.77153e-05	1841.46	-4.73808
C3	75.0907	80.6413	107.304	125.494	-1.40296	-0.488479	2.17932e-06	8.83442e-05	97.1325	-4.73604
AMOTL1	1810.52	1833.46	2113.46	2187.16	-1.17626	-0.234213	2.31336e-06	9.35079e-05	1986.15	-4.72392
SMPD1	2528.42	2544.44	2291.06	2309.11	1.11792	0.160816	2.37622e-06	9.57727e-05	2418.26	4.71847
ETNK2	114.675	108.596	76.8613	62.5115	1.41956	0.50544	2.43569e-06	9.76085e-05	90.661	4.71344
SDCBP	3336.95	3341.89	3711.58	3768.05	-1.13286	-0.179966	2.43146e-06	9.76085e-05	3539.62	-4.71379
FMNL1	199.626	173.365	245.083	235.409	-1.29679	-0.374944	2.51433e-06	0.000100188	213.371	-4.70696
PPIC	963.49	967.843	849.163	798.036	1.22215	0.289416	2.51007e-06	0.000100188	894.633	4.70731
P2RY1	22.7394	34.1018	10.0072	12.5077	1.47238	0.55815	2.52588e-06	0.000100363	19.839	4.70603
GRB10	708.81	682.658	866.274	815.328	-1.18118	-0.240232	2.54914e-06	0.000101001	768.267	-4.70416
EOGT	573.82	618.562	459.788	507.131	1.19962	0.262577	2.56601e-06	0.000101383	539.825	4.70281
RGS11	407.946	428.326	366.281	347.79	1.24063	0.311076	2.61831e-06	0.000103158	387.585	4.69869
MAP1B	5958.23	6357.97	6288.93	7233.54	-1.14373	-0.193749	2.66638e-06	0.000104758	6459.67	-4.69498
PNMA2	328.394	294.173	293.766	229.558	1.30483	0.383867	2.95024e-06	0.000115587	286.473	4.67425
KLF15	163.336	184.344	114.683	129.916	1.36081	0.44447	2.98652e-06	0.000116682	148.07	4.67174
NTRK2	79.0482	99.9085	140.582	177.191	-1.43947	-0.525542	3.15583e-06	0.000122954	124.182	-4.66041
EIF4G2	13451.7	13816.5	14343.4	15064.7	-1.09311	-0.128444	3.32876e-06	0.000129333	14169.1	-4.64942
SLC2A1	674.652	816.678	767.942	953.19	-1.17568	-0.233496	3.38068e-06	0.000130987	803.116	-4.64622
DAB2IP	1266.84	1253.07	1423	1469.5	-1.16966	-0.226094	3.5842e-06	0.00013849	1353.1	-4.63414
CAPS	287.822	255.419	244.713	196.83	1.26384	0.337809	3.60412e-06	0.000138877	246.196	4.633
CABLES1	392.383	416.383	453.893	517.752	-1.22865	-0.297071	3.74623e-06	0.000143958	445.103	-4.62499
DFNA5	1049.14	1123.12	900.794	952.299	1.16641	0.222072	3.75665e-06	0.000143964	1006.34	4.62441
KCNB1	263.291	383.858	157.359	252.944	1.38256	0.467339	3.81749e-06	0.000145897	264.363	4.62108
PLAT	1917.14	1633.98	1652.29	1175.39	1.25779	0.330888	3.89392e-06	0.000148413	1594.7	4.61697
ADORA1	34.413	32.4312	50.6586	60.4599	-1.44516	-0.531231	3.94187e-06	0.000149834	44.4907	-4.61442
PSD4	253.897	211.439	151.685	142.632	1.3344	0.416196	4.0455e-06	0.000153357	189.913	4.60903
PTPRK	1513.4	1439.29	1675.86	1627.42	-1.13634	-0.184399	4.09094e-06	0.000154662	1563.99	-4.60671
SLC1A4	487.395	518.449	376.193	408.969	1.23575	0.305389	4.14383e-06	0.00015624	447.751	4.60403
ITPR2	292.179	294.286	228.212	218.27	1.27878	0.354767	4.18622e-06	0.000157415	258.237	4.60192
FRAS1	364.647	378.517	239.717	281.466	1.29221	0.369835	4.26437e-06	0.000159925	316.087	4.59806
CTNNA1	6372.05	6331.94	6629.3	6920.63	-1.09169	-0.126559	4.40227e-06	0.000163833	6563.48	-4.59143
DAB2	4253.85	4393.92	4920.49	4926.96	-1.11601	-0.158354	4.40361e-06	0.000163833	4623.81	-4.59136
LUM	19868.1	21638.2	24138	26156.5	-1.1741	-0.231554	4.38866e-06	0.000163833	22950.2	-4.59207
WNT2	2384.77	2805.56	3170.4	3578.85	-1.24631	-0.317668	4.48412e-06	0.000166387	2984.89	-4.58758
TNS3	1325.39	1302.81	961.357	1003.96	1.23675	0.306559	4.55454e-06	0.000168478	1148.38	4.58433
ZBTB2	472.354	420.282	594.603	498.856	-1.17499	-0.232646	4.56449e-06	0.000168478	496.524	-4.58387
ENTPD7	180.703	190.466	253.342	261.838	-1.29865	-0.377018	4.66097e-06	0.000171587	221.587	-4.5795
CA12	520.587	534.276	681.102	677.925	-1.2367	-0.306499	5.27631e-06	0.000193732	603.472	-4.55349
ARHGAP29	3934.93	4082.5	3562.98	3496.66	1.15692	0.210284	5.38634e-06	0.000197255	3769.27	4.54915
GRIK2	418.101	395.48	504.391	488.658	-1.21763	-0.284079	5.72767e-06	0.000209209	451.657	-4.5362
MICAL1	3127.64	3370.09	2858.07	2914.83	1.14241	0.192086	6.28695e-06	0.000229041	3067.66	4.5165
MTHFD2	2059.07	1966.09	1665.31	1585.91	1.21896	0.285656	6.45259e-06	0.000234466	1819.09	4.51099
CREB3L2	2277.22	2176.6	1872.67	1915.88	1.12583	0.170985	6.51291e-06	0.000235438	2060.59	4.50902
OSBPL3	1869.78	1787.79	2192.84	2012.28	-1.11458	-0.156504	6.50882e-06	0.000235438	1965.67	-4.50915
FAM102A	967.357	887.126	1101.89	1066.2	-1.18322	-0.242722	6.78366e-06	0.000244595	1005.64	-4.50037
ADRA1B	60.0239	54.649	27.5835	30.7499	1.41937	0.505254	7.02076e-06	0.000252495	43.2516	4.49306
PIK3R2	1511.98	1567.22	1671.68	1764.19	-1.11453	-0.156438	7.05425e-06	0.000253051	1628.77	-4.49205
ITGA7	292.938	295.107	345.435	371.052	-1.30111	-0.379745	7.24281e-06	0.000259152	326.133	-4.48643
AC093642.3	46.516	34.6486	30.8893	15.7751	1.38681	0.471773	7.26597e-06	0.000259319	31.9572	4.48574
TINF2	655.578	703.997	598.947	598.318	1.17501	0.23267	7.66812e-06	0.000272977	639.21	4.47425
AKAP2	3285.05	3223.92	3763.97	3690.17	-1.14453	-0.194749	8.3304e-06	0.000295803	3490.78	-4.45651
CNIH3	71.802	55.2167	118.394	96.7679	-1.38342	-0.468239	8.78074e-06	0.000311007	85.5451	-4.44521
COL15A1	1410.75	1134.47	1065.41	762.181	1.35522	0.43853	8.84511e-06	0.000312498	1093.2	4.44364
TCEAL4	1665.7	1583.24	1412.88	1349.48	1.16562	0.221097	8.87805e-06	0.000312873	1502.83	4.44284
TMEM130	92.9367	61.1851	138.362	97.8963	-1.38816	-0.473178	8.94349e-06	0.000314389	97.5951	-4.44126
ZDHHC3	1903.97	1947.1	1722.5	1746.19	1.11448	0.156367	8.96844e-06	0.000314478	1829.94	4.44066
ADPRH	106.764	107.404	68.893	69.8271	1.37511	0.459542	9.02738e-06	0.000315756	88.2222	4.43925
FEM1C	568.001	537.675	676.174	646.977	-1.18686	-0.247151	9.40148e-06	0.000328023	607.207	-4.4305
LACC1	617.761	665.328	811.275	938.643	-1.31167	-0.391408	9.57508e-06	0.000333251	758.252	-4.42655
SRI	850.934	863.003	780.869	752.373	1.14081	0.190062	9.91494e-06	0.000344225	811.795	4.41902
COLGALT2	56.8744	61.9023	118.62	107.452	-1.39772	-0.483074	1.05873e-05	0.000366659	86.2123	-4.40482
ADAMTS2	1995.99	1663.11	1714.08	1465.14	1.13091	0.177478	1.06319e-05	0.000366686	1709.58	4.40391
EXT1	3839.62	3641.67	4234.04	4124.01	-1.12897	-0.175005	1.06403e-05	0.000366686	3959.83	-4.40373
GALNT15	601.091	646.824	382.377	424.56	1.35979	0.443379	1.09987e-05	0.000378106	513.713	4.39655
SGK1	952.046	931.396	787.429	737.464	1.23457	0.304014	1.11045e-05	0.000380811	852.084	4.39447
MORF4L2	3328.63	3276.15	3014.91	2914.37	1.118	0.160918	1.12442e-05	0.000384663	3133.52	4.39175
VCL	11663.5	11598.1	10371.4	10412.7	1.11007	0.150657	1.12799e-05	0.000384944	11011.4	4.39106
CEP170	1922.02	1835.59	2317.18	2140.32	-1.16002	-0.214147	1.20203e-05	0.000409217	2053.78	-4.37722
PXDN	7765.24	7574.08	7235.96	6630.38	1.15002	0.201663	1.20495e-05	0.000409217	7301.41	4.37669
SLC22A15	156.275	174.95	117.64	122.74	1.31404	0.394013	1.25746e-05	0.000426017	142.901	4.36738
TGOLN2	5956.71	6390.17	5727.57	5923.68	1.07754	0.107738	1.26588e-05	0.000427835	5999.53	4.36592
YEATS2	1016.65	1093.98	826.52	924.045	1.16895	0.22521	1.27186e-05	0.000428824	965.299	4.36489
TRIM22	2481.12	2656.28	2245.95	2314.07	1.1424	0.192067	1.3046e-05	0.00043881	2424.35	4.35933
MANSC1	321.968	339.46	259.119	268.663	1.23312	0.302312	1.31363e-05	0.000440789	297.302	4.35782
LOXL1	2782.75	2650.87	3386.37	3455.28	-1.23248	-0.301564	1.32618e-05	0.000443938	3068.82	-4.35574
MYLK	5843.25	4619.28	4889.21	4101.15	1.16138	0.215835	1.34502e-05	0.000449174	4863.22	4.35265
MATN2	1288.34	999.078	1039.65	758.35	1.23622	0.305933	1.36404e-05	0.000454443	1021.35	4.34957
ACPP	11.7264	10.3364	32.2563	32.9973	-1.3348	-0.416625	1.45468e-05	0.000483491	21.8291	-4.33544
SOD3	1468.72	1773.13	1716.17	2531.79	-1.32917	-0.410528	1.45881e-05	0.00048372	1872.46	-4.33482
CDCP1	74.4762	58.1672	130.694	102.555	-1.39206	-0.477223	1.46806e-05	0.000485637	91.4733	-4.33343
ALDH1L2	3551.44	3187.64	3009.06	2629.44	1.20529	0.269375	1.47177e-05	0.000485718	3094.39	4.33287
GPR4	74.8858	89.1812	50.3812	54.034	1.41077	0.496483	1.49035e-05	0.000490697	67.1206	4.33011
ANPEP	15936.6	12706.8	13928	10899.7	1.1583	0.21201	1.50023e-05	0.000492791	13367.8	4.32866
GNPTAB	901.596	1030.47	1074.91	1204.87	-1.15694	-0.210316	1.54202e-05	0.000505336	1052.96	-4.3226
C4orf3	1582.91	1466.37	1493.38	1268.49	1.14895	0.200312	1.57176e-05	0.000513881	1452.79	4.31838
RND3	5998.9	5636.71	7120.1	6741.76	-1.17062	-0.227275	1.57746e-05	0.000514546	6374.37	-4.31758
POPDC2	22.6579	32.7946	8.75821	8.86583	1.38318	0.46799	1.5966e-05	0.000519579	18.2691	4.31492
ELL2	2733.45	2917.33	2110.47	2362.58	1.19276	0.254306	1.63696e-05	0.00053148	2530.96	4.3094
ARF6	1034.54	1035.89	1161.66	1217.36	-1.15269	-0.205008	1.64144e-05	0.000531706	1112.36	-4.3088
TUFT1	292.266	338.624	332.317	420.67	-1.23	-0.298656	1.67505e-05	0.000541342	345.969	-4.30431
HIP1R	782.022	745.427	672.782	628.906	1.18389	0.243529	1.69223e-05	0.000545638	707.284	4.30205
IRF2BP2	954.345	988.086	1082.43	1121.98	-1.12682	-0.172256	1.72241e-05	0.000554094	1036.71	-4.29814
CTSK	11119	14128.7	12543.7	17323.1	-1.19574	-0.257909	1.76667e-05	0.000567034	13778.6	-4.29251
CHST10	198.262	233.002	129.455	165.889	1.31087	0.390526	1.80125e-05	0.000575639	181.652	4.2882
SLIT2	2214.12	2084.81	2591.58	2531.11	-1.19572	-0.257883	1.80169e-05	0.000575639	2355.41	-4.28815
PALLD	5573.77	5904.76	6198.44	6605.94	-1.11652	-0.159011	1.8229e-05	0.000581091	6070.73	-4.28555
ASS1	1555.78	1375.76	1736.82	1600.82	-1.17584	-0.233689	1.86333e-05	0.000592632	1567.29	-4.28067
PLTP	1100.49	1199.42	923.438	1024.97	1.15336	0.205839	1.87752e-05	0.000595793	1062.08	4.27898
TRAK2	1941.83	1970.33	1615.42	1717.67	1.13969	0.188642	1.91535e-05	0.000606425	1811.31	4.27454
LAMA2	2545.5	2793.98	1821.67	2030.09	1.30431	0.383292	1.93154e-05	0.000610174	2297.81	4.27266
INTS8	809.991	817.986	725.212	693.778	1.15481	0.207658	1.94972e-05	0.0006138	761.742	4.27057
MT1E	162.135	114.325	123.562	77.6755	1.3122	0.391991	1.95177e-05	0.0006138	119.424	4.27034
PRX	274.84	285.396	249.446	221.576	1.23981	0.310116	1.95963e-05	0.000614895	257.815	4.26944
SYNC	1410.07	1318.24	1595.89	1498.18	-1.12589	-0.171071	1.97613e-05	0.000618686	1455.59	-4.26757
ACVRL1	1446.56	1434.33	1175.36	1140.27	1.22597	0.293918	1.9866e-05	0.000620581	1299.13	4.26639
PTPRQ	55.3604	82.1433	28.1959	42.8952	1.41268	0.498432	1.99835e-05	0.000622865	52.1487	4.26507
CNST	426.283	408.52	539.296	510.427	-1.22874	-0.297174	2.05085e-05	0.00063711	471.131	-4.25928
SGCD	1564	1767.23	1250.7	1442.44	1.2107	0.275836	2.05314e-05	0.00063711	1506.09	4.25903
IRS1	1622.4	1662.87	1757.32	1900.34	-1.13571	-0.183599	2.06159e-05	0.00063832	1735.73	-4.25811
LIN7A	273.621	276.656	162.539	184.375	1.33528	0.417141	2.18237e-05	0.000672745	224.298	4.24537
PLEKHA1	569.119	626.325	507.215	510.653	1.20536	0.269459	2.18067e-05	0.000672745	553.328	4.24554
VPS53	578.156	571.789	578.455	662.811	-1.14675	-0.197552	2.18994e-05	0.0006736	597.803	-4.24459
TP53INP2	693.937	642.515	791.478	766.199	-1.17315	-0.230384	2.28402e-05	0.000700999	723.532	-4.23515
SOX13	254.186	246.299	193.735	183.57	1.27857	0.354531	2.29187e-05	0.000701873	219.448	4.23438
MEIS1	1142.83	1106.64	1285.79	1256.7	-1.13096	-0.177544	2.33727e-05	0.000714218	1197.99	-4.22997
CSRP1	2630.24	2582.78	2307.82	2213.81	1.15896	0.212828	2.39294e-05	0.000729639	2433.66	4.22467
STRADB	563.515	575.974	460.242	466.712	1.20808	0.272711	2.43058e-05	0.000739509	516.611	4.22115
CASP1	139.337	156.99	191.821	212.743	-1.28764	-0.364726	2.47366e-05	0.000747724	175.223	-4.21719
MMP19	563.542	485.968	448.149	398.196	1.19809	0.260736	2.4657e-05	0.000747724	473.964	4.21792
SLC1A1	370.542	344.174	312.454	278.921	1.21036	0.275437	2.47259e-05	0.000747724	326.523	4.21729
VAT1	11499.2	10632.3	11896.8	11842.7	-1.10886	-0.149081	2.47891e-05	0.000747724	11467.8	-4.21671
OPTN	3384.68	3339.33	3679.06	3639.42	-1.09128	-0.126025	2.5043e-05	0.000753761	3510.62	-4.21441
HMGA2	969.03	867.889	1139.06	1058.92	-1.20222	-0.265698	2.53956e-05	0.000762737	1008.73	-4.21126
OLFML2B	399.528	427.567	306.692	300.912	1.29836	0.376685	2.57878e-05	0.000772862	358.675	4.20779
ABHD17C	228.724	222.621	309.529	287.693	-1.24682	-0.318259	2.59725e-05	0.000776738	262.142	-4.20618
GEM	401.905	392.135	283.91	262.847	1.31769	0.398016	2.72097e-05	0.000812006	335.199	4.19564
CLSTN1	3332.7	3373.09	3124.98	3064.12	1.09994	0.137422	2.75392e-05	0.000820095	3223.72	4.19292
SLC1A3	65.1426	115.091	109.163	163.923	-1.32973	-0.411132	2.77091e-05	0.000823407	113.33	-4.19152
PCDH18	7581.92	7010.2	6755.82	6268.54	1.12078	0.164498	2.80058e-05	0.000830463	6904.12	4.1891
GAS1	923.651	941.089	711.917	731.373	1.23034	0.299059	2.8081e-05	0.000830938	827.008	4.1885
SLFN12	143.227	110.709	139.457	150.207	-1.29087	-0.368345	2.88964e-05	0.000853265	135.9	-4.18199
MAP2K6	39.4213	26.0599	62.6311	48.0634	-1.37247	-0.45678	2.92438e-05	0.000859901	44.0439	-4.17928
SEMA3D	1179.4	1460.39	1518.91	1849.21	-1.22555	-0.293427	2.92324e-05	0.000859901	1501.98	-4.17936
ANKRD13A	2587.05	2304.67	2978.96	2624.42	-1.12172	-0.165716	2.96036e-05	0.000868661	2623.77	-4.17649
NAGS	42.5544	39.6152	22.1235	19.9295	1.39355	0.478764	2.99245e-05	0.000876244	31.0556	4.17404
KCNT2	63.7666	53.1044	44.032	30.7751	1.36805	0.452124	3.02227e-05	0.000883133	47.9195	4.17178
ZDHHC9	1375.56	1291.01	1077.91	1079.72	1.16747	0.223379	3.05511e-05	0.000890872	1206.05	4.16932
TMEM35	143.484	111.667	210.881	171.499	-1.34852	-0.431381	3.06252e-05	0.000891181	159.383	-4.16877
ALCAM	3166.62	3223.24	2715.09	2764.21	1.16029	0.214481	3.23754e-05	0.00094016	2967.29	4.15608
ACO1	1758.89	1755.27	1869.82	1952.93	-1.10794	-0.147886	3.30272e-05	0.000957107	1834.23	-4.15152
EPDR1	993.193	1061.42	859.4	920.298	1.17907	0.237654	3.32576e-05	0.000959816	958.577	4.14993
SLC2A5	24.5912	34.8349	13.8404	16.193	1.41465	0.500447	3.32445e-05	0.000959816	22.3649	4.15002
COL4A1	3038.18	2611.19	2598.1	2299.2	1.13057	0.177047	3.34398e-05	0.000963093	2636.67	4.14868
CLMP	1786.32	1749.07	2110.88	2036.58	-1.16301	-0.217863	3.39325e-05	0.000975281	1920.71	-4.14533
MTURN	666.42	692.219	767.687	792.874	-1.13978	-0.188749	3.40534e-05	0.000976755	729.8	-4.14451
PPIF	337.497	343.576	382.757	416.788	-1.19187	-0.253226	3.63329e-05	0.00103969	370.155	-4.12964
SEPT9	7263.26	6588.95	8082.45	7602.96	-1.1354	-0.183204	3.63959e-05	0.00103969	7384.41	-4.12924
PKM	19443.8	16939.1	20905.1	18674.8	-1.10548	-0.14467	3.64962e-05	0.00104044	18990.7	-4.12861
MATN3	47.0797	58.4697	33.0463	31.4673	1.40086	0.48631	3.67247e-05	0.00104483	42.5157	4.12718
CHDH	108.487	116.799	138.588	160.046	-1.30225	-0.381012	3.76163e-05	0.00106803	130.98	-4.12165
BAIAP2	512.503	446.327	417.539	369.245	1.20599	0.270221	3.86007e-05	0.00109376	436.403	4.1157
EMC3	629.977	657.056	588.066	561.831	1.15952	0.213532	3.88247e-05	0.00109789	609.232	4.11436
KLF5	209.409	225.204	176.529	165.411	1.28884	0.366077	4.2821e-05	0.00120846	194.138	4.09171
SPATS2L	2380.13	2414.73	2183.16	2191.27	1.10924	0.149577	4.32928e-05	0.00121933	2292.32	4.08917
GOLGA8B	1567.34	1582.84	1519.08	1306.53	1.20614	0.270393	4.47191e-05	0.00125697	1493.95	4.08164
B3GNT5	87.0118	72.9318	56.2732	46.4354	1.35821	0.441703	4.49426e-05	0.00126073	65.663	4.08048
ZFHX3	848.943	903.936	655.013	771.354	1.15641	0.209656	4.55902e-05	0.00127634	794.811	4.07715
SFT2D2	984.833	906.623	819.283	779.69	1.15425	0.206959	4.59997e-05	0.00128524	872.607	4.07507
GPR126	106.384	107.013	45.7417	52.0254	1.38092	0.465625	4.61135e-05	0.00128586	77.7908	4.0745
RP11-558F24.4	30.9578	38.2953	28.9248	20.1974	1.38315	0.467961	4.81007e-05	0.00133861	29.5938	4.06467
RP11-597D13.9	167.192	174.276	114.517	127.733	1.29002	0.367398	4.8717e-05	0.00135308	145.929	4.0617
SSTR1	1007.09	1212.71	833.301	1022.65	1.2003	0.263392	4.9348e-05	0.00136789	1018.94	4.05869
LY6K	161.11	114.608	209.931	161.743	-1.2812	-0.3575	4.95127e-05	0.00136975	161.848	-4.05792
EPB41	308.265	313.572	373.016	393.861	-1.22299	-0.290416	4.99125e-05	0.00137539	347.179	-4.05604
JAM2	135.761	150.664	165.43	211.603	-1.30598	-0.385138	4.98195e-05	0.00137539	165.864	-4.05647
C15orf61	128.587	137.466	95.7554	98.0282	1.2983	0.376624	5.09114e-05	0.00139742	114.959	4.0514
C16orf45	2334.04	2243.58	2653.62	2605.71	-1.15633	-0.209554	5.0856e-05	0.00139742	2459.24	-4.05166
ADAM15	1390.77	1621.39	1196.8	1384.99	1.16132	0.215768	5.26832e-05	0.00144323	1398.49	4.04339
KIAA1671	157.765	175.458	205.525	236.658	-1.27586	-0.351473	5.42943e-05	0.00148447	193.851	-4.03633
AC027612.6	954.843	937.478	1040.08	1064.37	-1.13898	-0.187747	5.5267e-05	0.00150812	999.194	-4.03216
DTNA	192.525	203.97	130.344	145.426	1.32495	0.405942	5.57843e-05	0.00151928	168.066	4.02997
FER1L6	34.8683	22.3388	51.3606	54.1344	-1.36788	-0.451945	5.67015e-05	0.00154127	40.6755	-4.02613
AKR1C1	1324.18	1701.49	1577.24	2112.7	-1.20515	-0.269209	5.71816e-05	0.00154832	1678.9	-4.02415
ENO1	7247.12	7082.92	6763.18	6429.21	1.09332	0.128715	5.71764e-05	0.00154832	6880.61	4.02417
DAPK2	257.058	206.079	329.65	279.474	-1.28038	-0.356575	5.80344e-05	0.00156838	268.065	-4.02066
STK17A	787.914	788.177	965.932	936.284	-1.16075	-0.215061	5.84624e-05	0.00157691	869.577	-4.01893
TNFAIP8L3	50.2125	55.4545	29.2804	33.0472	1.37247	0.456775	5.89257e-05	0.00158381	41.9987	4.01707
TSC22D1	1300.76	1301.62	1458.17	1481.07	-1.12336	-0.167824	5.89439e-05	0.00158381	1385.41	-4.017
GNG12	5194.21	5189.53	5570.66	5653.33	-1.08267	-0.114599	5.93141e-05	0.00159071	5401.93	-4.01552
ZFP91	1946.51	1950.19	2126.36	2201.88	-1.1274	-0.173004	6.037e-05	0.00161593	2056.23	-4.01136
IL6R	155.568	164.327	194.05	217.435	-1.25736	-0.330395	6.0711e-05	0.00162197	182.845	-4.01003
REEP6	66.1808	52.6559	25.3844	22.5297	1.35859	0.442111	6.13625e-05	0.00163626	41.6877	4.00751
IGFBP3	4518.9	4886.76	6907.08	8751.59	-1.38323	-0.468038	6.3099e-05	0.00167937	6266.08	-4.00091
AZI2	1063.52	1013.69	937.969	894.259	1.12426	0.168977	6.339e-05	0.00168392	977.361	3.99982
GSR	739.315	807.878	667.962	709.024	1.13467	0.182277	6.75265e-05	0.00179041	731.045	3.98484
NARS2	150.282	156.245	188.577	202.501	-1.25313	-0.325538	6.93595e-05	0.00183554	174.401	-3.97847
MOXD1	8529.91	7243.84	7384.7	6611.9	1.10472	0.143676	6.99339e-05	0.00184726	7442.59	3.97651
FIBIN	167.47	152.976	104.12	103.315	1.31376	0.393706	7.29243e-05	0.00192262	131.97	3.96654
HMGA1	8300.99	6056.84	9808.24	8160.53	-1.23486	-0.304342	7.32524e-05	0.00192765	8081.65	-3.96547
GCNT4	341.425	365.521	272.891	296.775	1.22309	0.29053	7.34875e-05	0.00193022	319.153	3.9647
NME2	123.787	92.9428	119.524	132.74	-1.30448	-0.383471	7.3925e-05	0.00193808	117.248	-3.96329
ERGIC1	4692	4986.02	4434.36	4622.49	1.08121	0.112646	7.49845e-05	0.00196219	4683.72	3.95989
ELF1	1027.35	1072.15	875.693	873.415	1.20012	0.26318	7.55879e-05	0.00197429	962.153	3.95797
SETD7	2906.64	3085.28	3076.79	3376.69	-1.08737	-0.120845	7.60448e-05	0.00198254	3111.35	-3.95653
SYNJ2	813.961	700.745	994.617	796.517	-1.12974	-0.175994	7.7117e-05	0.00200676	826.46	-3.95319
BZW2	577.812	523.391	708.604	621.421	-1.17909	-0.237673	7.83626e-05	0.00203486	607.807	-3.94935
P4HA3	136.633	97.0478	95.5382	64.988	1.31926	0.399727	7.8487e-05	0.00203486	98.5517	3.94897
TRIM8	1931.96	2014.04	2135.98	2294.02	-1.11766	-0.160478	8.0649e-05	0.00208705	2094	-3.94246
GLCE	425.771	419.917	507.223	497.908	-1.17546	-0.233221	8.11178e-05	0.00209532	462.705	-3.94107
CAV2	1659.75	1547.84	1489.34	1340.33	1.13466	0.18226	8.22123e-05	0.0021179	1509.32	3.93786
HK2	313.843	355.665	407.058	448.255	-1.22364	-0.291183	8.22939e-05	0.0021179	381.205	-3.93762
REPS2	22.3079	24.6957	11.2362	9.45607	1.3109	0.390559	8.27119e-05	0.00212476	16.924	3.9364
ADAMTS14	154.98	168.479	218.083	217.877	-1.25129	-0.323411	8.42429e-05	0.00216013	189.855	-3.932
TRAK1	1507.67	1504.56	1788.99	1728.77	-1.13279	-0.179879	8.79826e-05	0.00225191	1632.5	-3.92155
FYCO1	1777.33	1848.56	1918.91	2050.13	-1.10725	-0.146977	8.87227e-05	0.00226671	1898.73	-3.91953
LRRN4CL	1177.44	1294.76	1359.32	1594.81	-1.20157	-0.264921	9.04072e-05	0.00230555	1356.58	-3.91499
COX20	451.99	456.466	403.203	379.029	1.18162	0.240769	9.29021e-05	0.00236487	422.672	3.90842
CASP4	663.335	677.479	565.751	566.621	1.17673	0.234784	9.43564e-05	0.00239754	618.297	3.90466
AF131217.1	130.592	137.842	96.0611	98.5771	1.30345	0.382338	9.49248e-05	0.00240762	115.768	3.90321
NTAN1	787.203	801.713	897.096	952.7	-1.18006	-0.238855	9.61169e-05	0.00243346	859.678	-3.90019
AKR1C3	283.538	314.27	355.409	398.433	-1.2385	-0.308598	9.65653e-05	0.00244041	337.912	-3.89906
CHD4	2821.18	2746	3086.78	3020.72	-1.09467	-0.130498	9.74229e-05	0.00245765	2918.67	-3.89692
DSTYK	1061.86	998.853	1209.53	1148.71	-1.13659	-0.184713	0.000100665	0.00253488	1104.74	-3.88898
FAM101B	605.789	620.144	506.594	509.346	1.21444	0.28029	0.000101477	0.00255074	560.468	3.88703
CTNNAL1	721.592	644.584	839.594	735.504	-1.14376	-0.19379	0.000102628	0.00256624	735.319	-3.88429
HIGD1A	1012.13	1031.13	853.184	898.193	1.1416	0.191063	0.000102693	0.00256624	948.658	3.88414
SIDT2	816.683	774.41	711.99	671.495	1.13756	0.185938	0.000102841	0.00256624	743.644	3.88379
TMEM132B	110.724	118.463	154.818	179.103	-1.32417	-0.40509	0.000103008	0.00256624	140.777	-3.88339
UAP1	1253.99	1329.79	1118.19	1124.65	1.16046	0.214703	0.000102444	0.00256624	1206.66	3.88473
FUT8	611.84	629.382	716.726	737.073	-1.16262	-0.21738	0.000103394	0.00257128	673.755	-3.88249
EVA1A	212.164	175.317	260.392	239.021	-1.25886	-0.332115	0.00010365	0.00257308	221.724	-3.88189
WNT5A	6184.63	6377.41	4830.04	5199.24	1.18319	0.242683	0.000104953	0.00260084	5647.83	3.87885
COL12A1	21113.7	23264.2	15786.2	18271.6	1.23437	0.303777	0.000107817	0.00266709	19608.9	3.87229
C1orf198	1928	2125.45	2253.39	2525	-1.15978	-0.213855	0.000108713	0.00268026	2207.96	-3.87027
SESN3	683.404	661.986	839.782	828.556	-1.23373	-0.30303	0.000108731	0.00268026	753.432	-3.87023
FGF5	773.008	679.304	1033.29	839.526	-1.21057	-0.27569	0.000109294	0.00268939	831.281	-3.86898
EIF1AX	1773.69	1901.51	1611.37	1697.9	1.1231	0.167486	0.000112214	0.00275642	1746.12	3.86254
AP1S2	392.241	369.92	395.299	449.105	-1.197	-0.259422	0.00011269	0.00276327	401.641	-3.86151
SH2D5	211.578	208.202	243.441	275.821	-1.24404	-0.315034	0.000114313	0.00279818	234.761	-3.85801
AKR1C2	439.989	532.076	540.702	659.878	-1.19388	-0.255659	0.000116277	0.00283722	543.161	-3.85385
STXBP5	701.472	669.965	791.674	773.638	-1.14801	-0.199135	0.000116313	0.00283722	734.187	-3.85377
SMPDL3A	604.587	677.013	527.369	593.974	1.15669	0.210008	0.000116854	0.00284547	600.736	3.85263
B3GNT1	469.768	567.296	437.502	488.089	1.15238	0.204614	0.000117974	0.00286778	490.664	3.8503
TGM2	855.472	580.464	975.475	765.712	-1.25441	-0.327013	0.000118224	0.00286887	794.281	-3.84978
TIMP3	17716.1	15053.2	21071.2	17929.1	-1.16656	-0.222256	0.000119369	0.00289165	17942.4	-3.84742
SEMA3E	28.0727	35.3735	13.7001	18.3178	1.3822	0.466967	0.000119584	0.00289186	23.866	3.84698
C14orf37	298.59	275.765	325.921	332.208	-1.1877	-0.248177	0.000120286	0.00290384	308.121	-3.84554
BTD	371.741	362.521	302.962	296.958	1.19616	0.258408	0.000122771	0.00295873	333.545	3.84053
FAM45A	1033.07	960.176	1120.67	1079.91	-1.11468	-0.156623	0.000124196	0.00298658	1048.45	-3.83769
RBPJ	2224.16	2299.08	1948.4	2029.05	1.11287	0.154281	0.000124352	0.00298658	2125.17	3.83738
BASP1	1378.4	1206	1497.27	1448.55	-1.16261	-0.217362	0.000125995	0.00302086	1382.56	-3.83416
DOCK4	94.1258	100.459	115.542	137.752	-1.29204	-0.369646	0.000127006	0.00303991	111.97	-3.83219
MAP4	10365.7	9537.59	10432.1	10318.1	-1.08016	-0.111239	0.000127936	0.00305695	10163.4	-3.8304
ANGPTL1	54.388	66.4206	36.9127	36.6324	1.35871	0.442237	0.000129512	0.00308935	48.5884	3.82738
NLGN1	384.523	399.816	472.705	499.36	-1.20756	-0.272089	0.000130507	0.0031078	439.101	-3.8255
TANGO6	221.489	252.734	255.941	316.63	-1.216	-0.282148	0.000131774	0.00313265	261.698	-3.82312
NEDD4L	147.928	144.792	184.107	189.557	-1.26274	-0.336563	0.000134791	0.00319894	166.596	-3.81754
SMCHD1	1208.52	1322.68	1131.9	1165.27	1.12398	0.168621	0.000135785	0.0032171	1207.09	3.81572
OSBPL9	969.483	944.068	906.55	835.389	1.1297	0.175942	0.000136854	0.00323149	913.872	3.81379
TMED3	1269.96	1263.96	1167.85	1105.17	1.1263	0.171586	0.000136644	0.00323149	1201.73	3.81417
AHNAK	42003.6	39573.8	42053.5	43748.6	-1.09752	-0.134246	0.000137956	0.00325204	41844.9	-3.81181
RGS4	50.9845	42.2743	83.5211	70.3751	-1.34757	-0.430361	0.000138338	0.00325558	61.7887	-3.81112
COL6A3	26457.2	19524.3	30061.6	24391.6	-1.20516	-0.269225	0.000141329	0.00331485	25108.7	-3.80583
SLC6A6	819.569	797.591	966.135	923.712	-1.14658	-0.197343	0.000141199	0.00331485	876.752	-3.80606
PINK1	1345.51	1294.22	1476.65	1470.87	-1.11642	-0.158882	0.000142132	0.00332812	1396.81	-3.80443
PPP1R12A	1509	1548.3	1337.01	1390.37	1.11196	0.153108	0.000142791	0.00333798	1446.17	3.80328
COL27A1	554.272	529.715	640.922	619.218	-1.16469	-0.219949	0.000144914	0.00337812	586.032	-3.79963
JAM3	1767	2103.87	1685.71	1862.31	1.11587	0.158168	0.000144995	0.00337812	1854.72	3.79949
SLC16A7	225.952	230.58	273.327	283.65	-1.20449	-0.268423	0.000145231	0.00337812	253.378	-3.79909
WWC3	910.746	994.036	1036.34	1133.27	-1.13103	-0.177642	0.000147585	0.00342719	1018.6	-3.7951
C16orf52	492.711	492.416	422.631	386.604	1.20218	0.265648	0.000149652	0.00346945	448.591	3.79165
CNBP	3542.11	3325.68	3411.08	3040.42	1.09474	0.130593	0.000150822	0.00349081	3329.82	3.78971
RASSF8	1683.54	1629.08	1882.33	1855.23	-1.13731	-0.185624	0.000151599	0.00350301	1762.55	-3.78844
STT3B	2253.73	2496.95	2096.78	2279.42	1.09641	0.132782	0.000151874	0.0035036	2281.72	3.78798
RP11-395B7.7	616.255	662.547	535.962	577.474	1.13349	0.180769	0.000152252	0.00350654	598.06	3.78737
LATS2	1145.57	1142.61	1249.06	1343.56	-1.15362	-0.206166	0.000153542	0.00352469	1220.2	-3.78527
LTBP4	2509.3	3035.76	1913.84	2263.31	1.24355	0.314462	0.000153517	0.00352469	2430.55	3.78531
BBX	1304.82	1375.97	1168.43	1233.17	1.11081	0.151619	0.000155026	0.00355294	1270.6	3.78288
DIEXF	470.28	476.416	569.516	560.535	-1.15594	-0.209072	0.000156241	0.00357494	519.187	-3.78093
NOTCH3	2387.71	2339.38	1997.61	2039.66	1.14123	0.190594	0.000158547	0.00362178	2191.09	3.77729
ACTG2	286.366	372.649	141.248	175.312	1.429	0.515006	0.000161684	0.00368745	243.894	3.7724
SOCS2-AS1	21.8669	20.2749	49.0837	37.9317	-1.31893	-0.399371	0.000163457	0.00372182	32.2893	-3.76968
ITGA6	833.453	782.179	799.86	657.798	1.21277	0.278308	0.000165989	0.00377335	768.322	3.76584
KLHDC8B	251.724	226.049	281.712	279.315	-1.1944	-0.256283	0.000166311	0.00377455	259.7	-3.76536
DAAM2	771.57	733.665	838.609	903.369	-1.19161	-0.252911	0.000167179	0.00378813	811.803	-3.76406
SLC25A25	292.103	257.008	344.392	324.108	-1.22278	-0.290166	0.000167581	0.00379112	304.403	-3.76346
MGAT5	1158.34	1219.67	1277.05	1357.69	-1.12444	-0.169211	0.000170163	0.00384333	1253.19	-3.75963
FNIP1	1064.5	969.809	1150.17	1087.02	-1.10798	-0.147929	0.000171302	0.00386283	1067.88	-3.75796
BCL7A	130.355	132.656	90.375	87.9718	1.31028	0.38988	0.00017379	0.00390638	110.339	3.75435
GNAS	13701.6	12470.9	13818.5	13316.2	-1.0706	-0.0984258	0.000173665	0.00390638	13326.8	-3.75453
CGNL1	90.4195	111.315	56.2265	61.0944	1.3449	0.427501	0.000175801	0.0039264	79.7639	3.75147
EMP1	3782.35	3306.23	4050.57	3651.95	-1.10097	-0.138772	0.000175191	0.0039264	3697.78	-3.75234
GCC2	759.465	727.565	813.262	826.695	-1.13675	-0.184916	0.000175748	0.0039264	781.747	-3.75155
OLFML2A	3795.53	4223.44	4962.56	5412.44	-1.29884	-0.377225	0.000175298	0.0039264	4598.49	-3.75219
DACT3	130.231	113.42	173.901	147.818	-1.24252	-0.313272	0.000177279	0.00395312	141.343	-3.74937
FBLN1	15606.7	16317	14424.2	14387.2	1.11595	0.158266	0.000178438	0.00397264	15183.8	3.74774
PI4K2A	914.507	894.237	989.682	1016.58	-1.11824	-0.161233	0.000181183	0.00402738	953.752	-3.7439
PNMA1	723.793	743.361	697.237	659.686	1.12808	0.173876	0.000181492	0.00402786	706.019	3.74348
SYNGR2	376.755	374.629	307.483	300.118	1.222	0.289241	0.000182598	0.004046	339.746	3.74195
CARHSP1	854.843	754.451	1023.84	911.546	-1.19459	-0.256511	0.000183584	0.00406143	886.17	-3.7406
TRERF1	821.881	692.779	900.992	786.868	-1.13015	-0.176512	0.00018468	0.00407926	800.63	-3.7391
NRG1	109.465	122.226	145.248	155.715	-1.25964	-0.333013	0.000185744	0.0040963	133.164	-3.73766
SEMA3B	2643.91	2795.58	2369.73	2378.79	1.16361	0.218608	0.000186656	0.00410995	2547	3.73642
NDC80	74.8112	72.1075	70.2391	48.1416	1.3126	0.392425	0.000190229	0.00418205	66.3249	3.73165
PLCB1	518.622	519.678	620.72	614.229	-1.1624	-0.217106	0.000197455	0.00433412	568.312	-3.72225
TNFRSF21	293.328	274.653	362.279	334.807	-1.18703	-0.247361	0.000199596	0.00437426	316.267	-3.71953
AMMECR1	376.143	372.494	320.128	305.478	1.20572	0.269895	0.000199919	0.00437451	343.561	3.71912
ITGB8	161.934	211.227	205.4	266.794	-1.2404	-0.310809	0.00020309	0.00443008	211.339	-3.71514
PXK	1479.69	1276.22	1621.65	1442.96	-1.11752	-0.160297	0.000203013	0.00443008	1455.13	-3.71524
ZNF385A	388.921	439.502	446.131	533.806	-1.17997	-0.238755	0.000205481	0.00447528	452.09	-3.71218
PRPS2	335.878	336.602	261.786	275.138	1.19458	0.256506	0.000207376	0.00450953	302.351	3.70986
CTSB	31111	30005.2	28213.5	27743.6	1.08958	0.123774	0.000208277	0.00452212	29268.3	3.70876
GXYLT2	95.9728	88.9464	110.109	119.41	-1.27607	-0.351704	0.000208721	0.00452477	103.609	-3.70822
KANK1	1175.02	1321.72	1345.04	1480.07	-1.10444	-0.143322	0.000211778	0.00458395	1330.46	-3.70454
SLC20A1	1148.41	1135.94	1331.65	1359.31	-1.16691	-0.222691	0.000212179	0.00458555	1243.83	-3.70406
OSBPL1A	1081.29	1034.12	1142.47	1162.76	-1.12142	-0.165332	0.000215125	0.00464207	1105.16	-3.70056
CALU	18764.9	20321	17487.9	18463.3	1.10035	0.137962	0.000224002	0.00481926	18759.3	3.69029
SSX2IP	711.564	612.989	652.508	458.523	1.28687	0.363865	0.000224024	0.00481926	608.896	3.69026
SLC39A7	2241.76	2116.87	2133.43	1937.3	1.08609	0.119139	0.000224455	0.00482114	2107.34	3.68977
DOCK7	1486.35	1465.61	1554.09	1636.33	-1.11158	-0.152613	0.000225388	0.00483378	1535.59	-3.68872
METAP1D	138.645	161.542	116.94	123.373	1.25321	0.325625	0.000227268	0.00486665	135.125	3.6866
LSAMP	77.8549	65.5463	95.4655	103.483	-1.32851	-0.409804	0.000232326	0.00496739	85.5873	-3.68099
FBXL7	754.34	782.495	856.299	891.16	-1.13439	-0.181921	0.000233113	0.00496907	821.074	-3.68013
RELN	24.781	20.1416	36.4175	36.3238	-1.32595	-0.40703	0.000232948	0.00496907	29.416	-3.68031
EFR3A	1443.43	1586.33	1584.23	1749.39	-1.09254	-0.127693	0.000236269	0.00502108	1590.85	-3.6767
KRT19	2426.9	2028.31	2989.19	2285.34	-1.17177	-0.228688	0.000236234	0.00502108	2432.43	-3.67674
TMEM45A	646.337	644.119	528.978	547.785	1.15701	0.210404	0.000240354	0.00510015	591.805	3.67233
ACTA2	1945.08	2489.24	1417.92	1740.81	1.28632	0.363253	0.000242746	0.00514313	1898.26	3.66979
PPAPDC1B	636.92	653.87	523.743	547.268	1.16857	0.22474	0.000247458	0.00523507	590.45	3.66488
PENK	692.082	528.054	591.148	427.809	1.2086	0.273332	0.000248431	0.00524772	559.773	3.66387
PIR	212.268	240.689	182.904	198.4	1.20775	0.272316	0.000248884	0.0052494	208.565	3.66341
FAM109A	382.861	401.789	304.312	327.602	1.20963	0.274565	0.000251261	0.00529158	354.141	3.66097
STK17B	321.348	297.205	364.544	358.611	-1.18909	-0.24986	0.000252	0.00529918	335.427	-3.66022
EYA1	104.28	98.4653	116.082	138.405	-1.28447	-0.361168	0.00025475	0.00534899	114.308	-3.65744
WNK1	3345.18	3386.06	3343.83	3653.74	-1.07378	-0.102702	0.000255132	0.005349	3432.21	-3.65705
ITPK1	1273.14	1250.08	1069.07	1099.89	1.1368	0.184973	0.000255703	0.00535296	1173.04	3.65648
FAM86B1	134.438	115.713	169.927	152.647	-1.24435	-0.315392	0.000258442	0.00539421	143.181	-3.65375
FTL	48691.1	55457.7	49066.6	50749.5	1.09925	0.136517	0.000258301	0.00539421	50991.2	3.65389
RABGEF1	1422	1290	1515.45	1512.11	-1.15788	-0.21149	0.000259852	0.00541558	1434.89	-3.65235
LCNL1	31.6324	20.5664	44.6747	36.926	-1.31536	-0.395453	0.000261924	0.00545066	33.4499	-3.65031
RWDD4	510.667	562.588	464.027	472.912	1.1785	0.236956	0.000262352	0.00545149	502.548	3.64989
LARP6	1127.95	1057.72	1326.14	1248.6	-1.16174	-0.216293	0.000267304	0.00552624	1190.11	-3.64508
MMP2	29023.2	29791.6	31688.8	34407	-1.1311	-0.177723	0.000267526	0.00552624	31227.6	-3.64487
SYT7	87.6713	79.7361	130.365	115.309	-1.30337	-0.382251	0.000267387	0.00552624	103.27	-3.645
ZNF281	802.545	719.09	974.003	880.054	-1.1934	-0.255073	0.000267485	0.00552624	843.923	-3.64491
COL13A1	199.276	172.982	241.173	219.938	-1.22411	-0.291735	0.000271689	0.00560088	208.342	-3.6409
DERA	352.545	337.787	324.568	282.605	1.17697	0.235076	0.000272337	0.00560088	324.376	3.64028
IGFBP5	21294.5	29825.7	26777.5	38782.6	-1.26016	-0.333612	0.000272333	0.00560088	29170.1	-3.64029
FOLR3	20.0687	26.3851	47.0014	53.2779	-1.34713	-0.42989	0.000275719	0.00566213	36.6833	-3.63711
C3orf58	330.404	350.294	384.629	420.303	-1.18185	-0.241045	0.000278504	0.00571096	371.408	-3.63452
CBX5	1489.73	1531.39	1650.14	1721.62	-1.11677	-0.159338	0.000279361	0.00572018	1598.22	-3.63372
TTL	1079.71	1146.18	1189.92	1262.96	-1.09567	-0.13181	0.000283969	0.00580605	1169.69	-3.6295
PLXNB1	1940.85	2151.61	1768.46	1948.77	1.1073	0.147051	0.000285644	0.0058318	1952.42	3.62798
GPR176	2896.12	2879.68	3127.57	3084.82	-1.07985	-0.110826	0.000286664	0.00583563	2997.05	-3.62706
KIAA1199	10749.1	9370.32	13850.8	12423.5	-1.24191	-0.312556	0.000286487	0.00583563	11598.4	-3.62722
MAPKBP1	744.169	707.07	787.32	821.043	-1.14466	-0.19492	0.00029133	0.00592201	764.9	-3.62289
MSANTD3-TMEFF1	100.752	33.7068	37.7037	0	1.00247	0.00355979	0.000291958	0.00592621	43.0406	3.62233
ASB13	183.164	184.43	159.73	142.681	1.23891	0.309066	0.000293181	0.00594242	167.501	3.62125
CKS2	76.2761	61.1181	90.8093	86.0725	-1.28577	-0.362633	0.000295445	0.00597896	78.569	-3.61926
PTPN14	2083.6	2107.94	2270.08	2367.34	-1.11229	-0.153528	0.000295836	0.00597896	2207.24	-3.61892
GFPT1	2048.68	1994.91	1743.72	1728.79	1.13752	0.185887	0.000300843	0.00607139	1879.03	3.61457
LEPROTL1	364.997	424.057	351.947	364.681	1.15553	0.208558	0.000302361	0.00609327	376.421	3.61327
ZNF521	758.499	720.521	865.009	828.124	-1.15081	-0.202654	0.000306923	0.00617632	793.039	-3.60939
DHX9	1872.51	1864.2	1912.63	2065.93	-1.10187	-0.139949	0.00030899	0.00620903	1928.82	-3.60764
KCNN2	141.207	140.432	83.4886	86.6459	1.33102	0.41253	0.000310178	0.00622397	112.943	3.60665
IPPK	139.42	155.495	139.743	121.313	1.23184	0.300815	0.000311736	0.0062463	138.993	3.60535
DMD	45.6561	52.4466	30.351	30.4099	1.31562	0.395746	0.00031364	0.00627549	39.7159	3.60377
ALDH9A1	1714.03	1509.34	1913.51	1688.69	-1.11094	-0.151786	0.000315845	0.0063106	1706.39	-3.60195
HSPB6	4767.58	4565.77	4220.24	3900.1	1.16381	0.218854	0.00031965	0.00637754	4363.42	3.59883
B4GALT1	1699.48	1746.1	1536.18	1542.75	1.12808	0.173874	0.000324424	0.00646359	1631.13	3.59497
CHEK2	88.8167	101.698	78.0231	74.6896	1.27144	0.346467	0.000327436	0.00650511	85.8068	3.59257
EYA2	174.277	174.056	134.948	134.477	1.25893	0.332198	0.000327136	0.00650511	154.44	3.59281
SERPINB2	783.955	1022.42	1046.83	1363.59	-1.26129	-0.3349	0.000331119	0.00656899	1054.2	-3.58965
CDC42SE2	272.44	281.409	242.364	228.135	1.20162	0.264986	0.000335598	0.00664292	256.087	3.58615
OLFML1	915.367	819.976	1062.14	998.83	-1.19025	-0.251266	0.000335793	0.00664292	949.078	-3.586
FOXN3	1498.19	1683.57	1360.91	1518.35	1.1165	0.158981	0.000340079	0.00671824	1515.25	3.58269
KIAA1377	317.651	297.678	228.496	242.937	1.20934	0.274219	0.000342594	0.00675839	271.691	3.58076
MARCH6	2558	2560.95	2387.25	2354.57	1.08374	0.116021	0.000344241	0.00678136	2465.19	3.57951
RAPGEF3	226.094	174.291	191.292	126.074	1.25033	0.32231	0.000349085	0.00686713	179.438	3.57586
SLC44A1	1916.26	1811.19	1711.8	1628.75	1.1118	0.152898	0.000350379	0.00687331	1767	3.57489
ZNF589	300.924	358.043	392.291	441.799	-1.19608	-0.258318	0.000350249	0.00687331	373.264	-3.57498
PLEKHM2	2125.03	2139.96	2294.05	2391.92	-1.1049	-0.143915	0.000352942	0.00691392	2237.74	-3.57298
ARMC8	438.392	448.902	388.919	376.337	1.16657	0.22227	0.000356635	0.00697652	413.137	3.57025
ANKRD28	2204.82	1939.98	1981.46	1738.33	1.11845	0.161498	0.000358825	0.00700958	1966.15	3.56865
PIP4K2A	897.104	818.759	1032.06	928.404	-1.13176	-0.178569	0.000361168	0.00704554	919.082	-3.56694
FMOD	427.438	487.388	472.653	633.232	-1.24514	-0.316311	0.000364242	0.00709564	505.178	-3.56472
ARID4A	391.249	380.584	440.529	454.021	-1.17659	-0.234611	0.000369322	0.00718462	416.596	-3.56109
CTHRC1	1788.96	1563.17	1557.6	1237.97	1.19246	0.25394	0.000370714	0.00720171	1536.93	3.5601
ZNF618	405.042	409.91	491.39	475.447	-1.15357	-0.206106	0.000372198	0.00722053	445.447	-3.55905
AHR	1913.75	2224.39	1684.05	1924.59	1.16001	0.214139	0.000376688	0.00729755	1936.69	3.5559
FSTL3	583.982	563.609	487.473	468.669	1.17501	0.232673	0.000379794	0.00733744	525.933	3.55374
ISLR	4118.24	3120.51	3587.25	2613.14	1.16169	0.21622	0.000379534	0.00733744	3359.79	3.55392
SLC9A7	206.552	206.827	257.866	258.302	-1.21086	-0.276034	0.000380832	0.00734739	232.387	-3.55302
RECK	6593.1	7209.31	7315.93	8184.02	-1.12211	-0.166209	0.000385584	0.00742884	7325.59	-3.54976
DNAJB5	183.891	194.799	237.842	251.794	-1.2305	-0.299247	0.000388036	0.00746583	217.082	-3.54809
NDRG1	2615.04	2416.76	2817.17	2653.4	-1.09429	-0.130001	0.000397771	0.00764266	2625.59	-3.54156
TNS1	4666.71	4513	4891.33	5002.7	-1.10295	-0.141362	0.000406922	0.00780778	4768.44	-3.53555
KIF13A	2229.08	2047.99	2427.41	2247.31	-1.08924	-0.123316	0.000409352	0.00784368	2237.95	-3.53398
ANG	82.4137	89.3322	63.3021	59.9308	1.30423	0.3832	0.000414503	0.00793153	73.7447	3.53067
CD99P1	63.2629	77.1593	64.238	53.7936	1.29188	0.369476	0.00041629	0.00794405	64.6135	3.52954
TNFAIP8	292.536	307.985	281.705	246.58	1.21744	0.283852	0.000416144	0.00794405	282.202	3.52963
BPI	25.6941	20.0393	12.2119	7.62467	1.27308	0.348318	0.000418901	0.00798303	16.3925	3.52788
STARD13	536.97	520.616	610.595	625.438	-1.18248	-0.24182	0.000421153	0.00801504	573.405	-3.52646
HIP1	428.093	377.822	467.135	443.803	-1.16386	-0.218917	0.000423486	0.00804853	429.213	-3.525
TMEM179B	420.493	423.445	377.86	365.269	1.14732	0.198265	0.00042655	0.0080958	396.767	3.52309
PABPC1L	510.971	458.411	456.976	384.804	1.17854	0.236997	0.000429547	0.00814166	452.79	3.52123
SSC5D	2907.12	2724.33	2979.55	2975.18	-1.11845	-0.161506	0.000432715	0.00819064	2896.54	-3.51928
VAT1L	32.5565	23.9422	53.3825	46.7797	-1.3248	-0.405772	0.000434608	0.00821538	39.1652	-3.51812
NHS	142.131	112.247	176.242	145.316	-1.23856	-0.308666	0.000435291	0.00821715	143.984	-3.51771
ST6GALNAC3	24.9184	24.654	8.43802	11.4657	1.29551	0.373518	0.000435873	0.00821715	17.369	3.51735
CEP68	502.724	458.208	533.073	528.437	-1.14476	-0.195042	0.000441628	0.00831059	505.61	-3.51387
MUC1	200.013	194.853	150.564	148.198	1.23848	0.308567	0.000442015	0.00831059	173.407	3.51364
CDC6	61.9541	69.7886	78.5346	98.3476	-1.27732	-0.353117	0.000443379	0.00831395	77.1562	-3.51282
TCEAL3	641.269	589.82	567.962	517.626	1.13577	0.183672	0.000443259	0.00831395	579.169	3.51289
PRR15	25.4013	29.4706	12.2244	15.2957	1.28654	0.3635	0.000443988	0.00831425	20.598	3.51245
RUNX2	117.089	89.4305	81.9462	57.984	1.29131	0.368838	0.000446311	0.00834662	86.6123	3.51107
ABCA5	314.821	325.154	365.036	405.126	-1.19551	-0.257629	0.00045484	0.00849478	352.534	-3.50603
ADCY9	1937.45	2207.84	2086.81	2507.07	-1.12337	-0.167838	0.000459913	0.00855536	2184.8	-3.50308
CDC14A	55.9476	54.4907	47.2567	35.4137	1.30447	0.383468	0.000459803	0.00855536	48.2772	3.50314
SBSN	194.244	193.147	243.705	253.479	-1.25105	-0.323136	0.000459561	0.00855536	221.144	-3.50328
NEK7	2502.52	2870.39	2822.22	3181.21	-1.11103	-0.151897	0.000462908	0.00859167	2844.09	-3.50135
TMEM39A	656.877	693.758	610.081	607.465	1.13179	0.1786	0.00046309	0.00859167	642.045	3.50124
THRB	423.196	427.89	285.693	334.787	1.20275	0.266336	0.000466641	0.00864612	367.891	3.49921
GPR124	5861.53	5657.73	6113.02	6223.31	-1.09503	-0.130969	0.000469267	0.00868329	5963.9	-3.49771
CTXN1	66.5691	66.9725	79.3834	100.234	-1.30739	-0.386691	0.000470029	0.00868594	78.2897	-3.49728
ASPA	144.014	156.453	98.8016	106.257	1.28627	0.363191	0.00047725	0.00880777	126.381	3.49321
DPYD	507.945	504.53	541.396	580.544	-1.14707	-0.197957	0.000482076	0.00888514	533.604	-3.49052
TMEM255B	104.588	102.419	90.5038	75.6149	1.25909	0.332381	0.000494547	0.00910304	93.2815	3.48369
PGM1	892.455	878.929	810.667	786.505	1.11346	0.155053	0.000499217	0.00917695	842.139	3.48118
AACS	942.712	812.431	814.463	690.606	1.1449	0.195227	0.0005022	0.00920765	815.053	3.47958
SPOCD1	435.09	305.111	540.721	388.327	-1.20602	-0.270254	0.000502031	0.00920765	417.312	-3.47967
DYNC1H1	8390.98	8468.76	8661.09	9147.68	-1.08474	-0.117347	0.000509068	0.00931176	8667.13	-3.47594
MAP4K4	5847.1	5418.55	6761.33	6035.55	-1.11673	-0.159283	0.000509206	0.00931176	6015.63	-3.47587
MYO18A	1357.48	1166.63	1476.07	1304.3	-1.10861	-0.14875	0.000514535	0.00938475	1326.12	-3.47307
TGFB3	99.6017	99.8607	109.954	135.027	-1.25709	-0.330091	0.000514516	0.00938475	111.111	-3.47308
KRTAP1-5	610.893	458.869	683.21	567.351	-1.23214	-0.301164	0.000516043	0.00940002	580.081	-3.47229
GREM1	20113.7	21388.6	22154.1	24170.8	-1.13595	-0.183894	0.000517064	0.00940641	21956.8	-3.47176
TOR3A	581.735	614.229	522.094	534.233	1.14592	0.196512	0.000518966	0.00942879	563.073	3.47077
SLC19A2	141.427	156.571	107.645	117.841	1.25168	0.323862	0.000520839	0.00945056	130.871	3.4698
PON2	646.894	679.214	585.148	571.843	1.15994	0.214055	0.00052727	0.00955489	620.775	3.46651
IQSEC2	339.48	340.046	329.464	289.009	1.15903	0.212917	0.000537226	0.00970407	324.5	3.46147
MRPS6	813.054	933.412	979.234	1077.93	-1.13394	-0.181346	0.000536685	0.00970407	950.906	-3.46175
SYNE3	300.218	298.72	408.138	358.361	-1.17927	-0.237891	0.000537577	0.00970407	341.359	-3.4613
PCDHGC3	2374.7	2583.66	2743.99	2997.15	-1.14402	-0.194116	0.000557591	0.0100524	2674.88	-3.45145
SYT1	112.925	116.642	72.9936	68.4941	1.32806	0.409317	0.000558532	0.0100565	92.7635	3.45099
EIF3G	1778.16	1777.19	1648.7	1645.63	1.08555	0.118432	0.000562216	0.0101098	1712.42	3.44922
TCF12	1953.71	1875.94	1607.52	1627.87	1.1298	0.17607	0.000568655	0.0102125	1766.26	3.44614
EML1	1267.74	1148.12	1487.55	1271.3	-1.1173	-0.160016	0.000575879	0.010329	1293.68	-3.44273
ADH1B	844.741	1511.38	749.76	1325.32	1.23416	0.303535	0.000581995	0.0104254	1107.8	3.43987
TMEM119	3720.91	3654.45	4551.91	4385.71	-1.2031	-0.266751	0.000590731	0.0105684	4078.24	-3.43583
C10orf105	25.61	23.9616	55.5111	39.5058	-1.29268	-0.370363	0.000592768	0.0105913	36.1471	-3.4349
HPSE2	23.9947	18.4674	29.8524	34.8978	-1.31721	-0.397481	0.00059432	0.0106055	26.8031	-3.43419
CUL7	1157.75	957.767	1052.36	860.432	1.10306	0.141516	0.000595795	0.0106183	1007.08	3.43352
LIMD1	765.001	742.176	818.213	833.443	-1.12978	-0.176038	0.000598174	0.0106472	789.708	-3.43244
FAM110B	126.526	132.953	164.132	168.618	-1.21671	-0.282981	0.000600539	0.0106757	148.057	-3.43137
ZYX	6343.74	6108.16	6576.93	6694.73	-1.09411	-0.129752	0.000601655	0.010682	6430.89	-3.43087
TMEM66	2257.11	2370.87	2224.33	2202.46	1.07477	0.104034	0.000604698	0.0107225	2263.69	3.4295
USP34	2244.24	2131.7	2280.31	2325.27	-1.08772	-0.12131	0.00061186	0.0108358	2245.38	-3.4263
TOX	258.704	222.115	175.305	170.176	1.23249	0.301576	0.000623626	0.0110302	206.575	3.42113
PCYOX1	6514.72	6799.4	6256.84	6363.93	1.08092	0.112253	0.000626006	0.0110584	6483.72	3.42009
SNX9	4036.57	4073.29	4463.76	4479.91	-1.10198	-0.140098	0.00063464	0.0111968	4263.38	-3.41636
TMEM198B	816.684	739.979	787.632	648.236	1.12733	0.172908	0.000635975	0.0112063	748.133	3.41579
GPR161	303.941	294.341	253.863	239.662	1.19142	0.252685	0.000643265	0.0113205	272.952	3.41268
DDIT4	920.699	862.122	700.248	604.213	1.28166	0.358012	0.000647979	0.0113892	771.821	3.41069
PFKFB3	443.506	440.973	513.697	520.447	-1.16369	-0.218707	0.000651439	0.0114356	479.656	-3.40924
CDC42EP3	3992.02	3517.3	3454.95	2952.45	1.16441	0.219593	0.000652492	0.0114398	3479.18	3.4088
PREX1	160.626	141.226	130.452	103.157	1.25812	0.331266	0.000654245	0.0114562	133.865	3.40807
AK4	223.983	193.554	247.935	243.953	-1.21677	-0.283062	0.000655296	0.0114603	227.356	-3.40763
WNT2B	516.644	385.52	449.745	334.286	1.15203	0.20418	0.000661096	0.0115474	421.548	3.40522
GLB1	1912.78	1952.42	1761.74	1778.85	1.0945	0.130271	0.000662858	0.0115494	1851.45	3.4045
RAB30	390.62	409.531	474.286	485.788	-1.16018	-0.214354	0.000662314	0.0115494	440.056	-3.40472
DNMBP	1561.57	1554.95	1490.4	1374.72	1.13151	0.178243	0.000680287	0.0118203	1495.41	3.3974
HNMT	191.836	242.292	155.77	194.096	1.21255	0.278046	0.000679657	0.0118203	195.999	3.39766
PERP	2872.36	3047.58	3195.11	3408.68	-1.1064	-0.145877	0.000680937	0.0118203	3130.93	-3.39714
DGKA	1382.56	1344.87	1521.24	1480.29	-1.1011	-0.138945	0.00068241	0.0118313	1432.24	-3.39655
PLIN3	2246.31	1915.5	2379.68	2105.37	-1.10148	-0.139446	0.000691737	0.0119781	2161.72	-3.39283
DDX6	1610.12	1569.25	1591.23	1704.42	-1.08543	-0.118263	0.000693023	0.0119856	1618.76	-3.39232
VDR	603.513	565.346	664.419	673.571	-1.17113	-0.227899	0.000704868	0.0121755	626.712	-3.38768
LRRC2	233.042	333.366	345.904	434.169	-1.23074	-0.29953	0.000707904	0.0122129	336.62	-3.3865
APOL3	218.547	212.424	260.147	263.67	-1.20198	-0.265416	0.000715353	0.0123127	238.697	-3.38363
OGDH	1942.61	1861.92	2078.52	2045.73	-1.08931	-0.123421	0.000717202	0.0123127	1982.19	-3.38292
SCN8A	828.03	925.507	978.74	1027.33	-1.10961	-0.150054	0.000715476	0.0123127	939.903	-3.38358
ZFP36L1	4994.73	4788.01	5239.11	5442.26	-1.11751	-0.160293	0.000717121	0.0123127	5116.03	-3.38295
B4GALT5	1013.44	1059.36	1105.28	1184.25	-1.11243	-0.15371	0.000720158	0.0123483	1090.58	-3.38179
EXOC6B	695.013	739.917	802.212	861.542	-1.1455	-0.195976	0.000724209	0.0123875	774.671	-3.38025
SNX29	1254.34	1133.34	1358.51	1270.33	-1.118	-0.160924	0.000723573	0.0123875	1254.13	-3.38049
NR2F2	2612.38	2376.62	2250.91	2110.52	1.10825	0.148284	0.000725163	0.0123887	2337.61	3.37988
OXSR1	784.667	770.549	808.126	854.511	-1.11155	-0.152578	0.00072781	0.0124188	804.463	-3.37888
ABCC3	989.475	992.021	870.748	802.206	1.18672	0.246979	0.000732812	0.0124835	913.613	3.377
STX3	255.283	248.326	300.676	297.353	-1.16758	-0.223522	0.000733379	0.0124835	275.41	-3.37679
FAM211A	41.7641	36.2875	64.9653	54.4829	-1.2934	-0.371164	0.000737349	0.0125358	49.3749	-3.3753
EHBP1	2544.14	2662.08	2269.98	2428.32	1.10242	0.140678	0.000745563	0.0126601	2476.13	3.37225
IKZF2	150.667	156.017	122.537	117.477	1.23556	0.305163	0.000754839	0.0128021	136.675	3.36884
LOXL3	592.021	542.521	535.274	461.896	1.15057	0.20235	0.000756307	0.0128115	532.928	3.36831
A4GALT	546.686	546.69	487.609	463.808	1.16826	0.224356	0.000775622	0.0131071	511.198	3.36135
DLC1	2162.21	2108.71	2329.73	2345.63	-1.11083	-0.151644	0.000774924	0.0131071	2236.57	-3.3616
SRGAP1	1441.34	1378.91	1517.54	1518.23	-1.09658	-0.133015	0.000778037	0.0131321	1464	-3.36049
ARHGAP18	778.905	779.74	690.991	691.093	1.14012	0.189187	0.000786359	0.0132407	735.182	3.35755
DGKZ	837.441	837.011	923.361	940.566	-1.11338	-0.154941	0.000785762	0.0132407	884.595	-3.35776
KCNMA1	1939.32	1920.51	1775.46	1694.62	1.14792	0.199025	0.000789021	0.0132695	1832.48	3.35662
MEIS2	603.477	604.58	655.101	677.505	-1.11426	-0.156086	0.00079394	0.0133203	635.166	-3.3549
WNT5B	1543.27	1376.64	1281.59	1229.27	1.11627	0.158681	0.000793584	0.0133203	1357.69	3.35502
ABLIM1	511.618	490.129	401.333	390.84	1.18601	0.246119	0.000799253	0.0133879	448.48	3.35305
ACE	1306.39	1310.17	1144.92	1134.29	1.15689	0.210255	0.000799877	0.0133879	1223.94	3.35284
MAPK3	1903.14	1713.7	2008.43	1928.92	-1.11098	-0.151829	0.000801095	0.0133923	1888.55	-3.35242
ASCC3	2065.52	2168.12	2211.25	2334.95	-1.08236	-0.114178	0.000807343	0.0134807	2194.96	-3.35026
ARID5B	4522.35	3930.77	5012.04	4469.6	-1.12444	-0.169212	0.000820531	0.013636	4483.69	-3.34577
HOTAIR	379.382	368.044	346.628	307.798	1.18028	0.239124	0.000818279	0.013636	350.463	3.34654
MAP1LC3B	2039.09	2100.39	2177.97	2279.72	-1.08009	-0.111156	0.000820367	0.013636	2149.29	-3.34583
MYO1E	937.295	972.949	1075.3	1130.27	-1.13489	-0.182546	0.000820093	0.013636	1028.95	-3.34592
PAPOLA	1954.3	2021.77	2013.75	2192	-1.08156	-0.11311	0.000840459	0.0139506	2045.46	-3.33911
YES1	877.827	831.453	948.574	928.944	-1.11323	-0.15475	0.000845447	0.0140168	896.699	-3.33747
APP	23086.6	24349.1	23656.1	26324.8	-1.07583	-0.105444	0.000853274	0.0141299	24354.2	-3.33491
FAM171B	537.375	513.979	678.132	603.346	-1.15475	-0.207578	0.000857853	0.0141723	583.208	-3.33342
KCNQ5	124.371	106.624	143.765	136.01	-1.22255	-0.289892	0.000857245	0.0141723	127.692	-3.33362
CDH4	118.539	111.75	100.238	81.9711	1.27013	0.344971	0.000860482	0.014199	103.124	3.33257
KDELR2	5377.47	5382.26	5151.53	5020.66	1.06759	0.094355	0.000867645	0.0143003	5232.98	3.33026
FHDC1	117.336	141.43	102.387	110.999	1.24197	0.312628	0.000872025	0.0143557	118.038	3.32886
PCK2	906.481	784.277	784.274	642.784	1.19272	0.254251	0.000883625	0.0145296	779.454	3.32518
CYB5R3	12698	12788.1	11419	12028.8	1.08807	0.121775	0.000890269	0.0146046	12233.5	3.32309
SMAD6	152.75	155.327	180.359	198.199	-1.22717	-0.295335	0.000890033	0.0146046	171.659	-3.32316
HSPA8	10434.5	11912.9	11536.2	13112.9	-1.10361	-0.142225	0.000903914	0.0148111	11749.1	-3.31884
CST3	3645.85	3902.75	3266.64	3556.43	1.10714	0.146839	0.000908825	0.0148742	3592.92	3.31733
CLDN11	10408.8	8145.31	11704.7	9655.92	-1.18928	-0.250086	0.000912735	0.0149208	9978.68	-3.31613
CA5B	313.453	262.237	340.806	314.712	-1.1716	-0.228477	0.000916247	0.0149434	307.802	-3.31506
SLC27A1	474.356	460.136	524.496	554.924	-1.18104	-0.240053	0.000915408	0.0149434	503.478	-3.31531
MGST1	2639.03	2735.69	2434.45	2539.02	1.08617	0.119254	0.000921448	0.0149933	2587.05	3.31347
USP33	1189.15	1229.75	1120.08	1103.43	1.11305	0.154521	0.000921267	0.0149933	1160.6	3.31353
CACNB2	25.6114	29.5385	12.454	17.0766	1.27914	0.35517	0.000928084	0.0150838	21.1701	3.31147
VSTM4	1348.26	1394.62	1606.24	1589.14	-1.14701	-0.197884	0.00093452	0.0151708	1484.57	-3.30953
TRIM29	54.9353	47.9187	35.5614	30.5187	1.29356	0.37135	0.000942004	0.0152746	42.2335	3.3073
SPATA6	185.526	168.906	154.402	135.356	1.20357	0.267315	0.000945624	0.0153018	161.048	3.30622
VGLL3	8926.43	9699.56	9982.44	10815.3	-1.09794	-0.1348	0.00094586	0.0153018	9855.94	-3.30615
SLC6A17	83.458	89.7289	63.4749	67.7458	1.27657	0.352271	0.000950135	0.0153532	76.1019	3.30489
PTGS2	237.779	113.099	337.902	167.71	-1.26339	-0.337301	0.000959595	0.0154882	214.123	-3.30211
MAPK8IP1	264.683	234.352	280.749	291.609	-1.19581	-0.257985	0.000969277	0.0156086	267.848	-3.2993
VPS13B	1406.95	1443.43	1462.29	1573.17	-1.08359	-0.115817	0.000969171	0.0156086	1471.46	-3.29933
TPRA1	544.646	580.488	475.774	504.48	1.13607	0.184047	0.000972432	0.0156414	526.347	3.29838
PLEKHA2	434.715	368.839	369.608	299.274	1.18815	0.248713	0.000973944	0.0156478	368.109	3.29795
WWTR1	1888.26	1746.54	2122.17	1925.75	-1.10337	-0.141921	0.000976064	0.0156639	1920.68	-3.29734
PDGFRA	7970.92	6779.21	8849.14	7544.22	-1.12315	-0.16755	0.000978069	0.0156782	7785.87	-3.29676
RP11-611O2.3	78.0048	100.831	77.1696	71.6515	1.27432	0.349733	0.00098099	0.015707	81.9141	3.29592
PLCB3	796.741	880.587	921.076	995.533	-1.12466	-0.169492	0.000984921	0.0157395	898.484	-3.2948
TMEM14A	232.988	246.17	221.513	203.225	1.18156	0.240693	0.000985265	0.0157395	225.974	3.2947
CLASP1	1081.39	1126.45	967.63	997.767	1.11633	0.158761	0.0010382	0.0165663	1043.31	3.27997
THOC2	1037.78	1024.5	900.492	914.625	1.11412	0.155905	0.00104346	0.0166314	969.349	3.27854
AFF1	787.488	783.386	824.834	876.354	-1.10752	-0.147336	0.00105408	0.0167644	818.016	-3.27568
ETHE1	417.115	415.723	499.529	483.361	-1.1597	-0.21375	0.0010542	0.0167644	453.932	-3.27565
SETBP1	387.544	377.162	333.459	319.075	1.1659	0.221447	0.00106758	0.0169579	354.31	3.27208
METRNL	2235.98	2341.69	1929.27	2087.36	1.15176	0.203845	0.00107208	0.0170102	2148.58	3.27089
LFNG	47.717	43.2532	59.9864	62.5271	-1.28085	-0.357105	0.00108317	0.0171667	53.3709	-3.26798
PRNP	4336.13	4885.12	4645	5269.76	-1.07772	-0.107976	0.00108837	0.017221	4784	-3.26663
TSPAN31	349.808	366.393	336.013	314.296	1.15296	0.205339	0.00108905	0.017221	341.627	3.26645
BCAP31	1313.06	1422.83	1267.6	1284.79	1.09906	0.136267	0.00110506	0.0174369	1322.07	3.26232
HK1	2049.4	2071.92	2283.36	2293.15	-1.09484	-0.130725	0.00110519	0.0174369	2174.46	-3.26228
SPRY1	112.476	133.948	93.4235	98.6597	1.2564	0.329293	0.00111086	0.0175067	109.627	3.26083
FBLN5	6932.1	6707.58	6219.46	5943.92	1.11742	0.160177	0.00112417	0.0176965	6450.77	3.25745
GGT5	57.3639	33.6914	44.6756	20.3832	1.26855	0.343185	0.00113646	0.0178492	39.0285	3.25436
OSBPL8	1848.83	1949.86	2057.57	2185.05	-1.10537	-0.144526	0.00113693	0.0178492	2010.33	-3.25425
REEP4	196.006	219.896	177.717	180.823	1.18813	0.248687	0.00113768	0.0178492	193.611	3.25406
SLC22A17	441.124	422.591	388.844	365.011	1.15293	0.205308	0.00114597	0.0179591	404.393	3.252
ITGA8	51.3516	41.2691	80.1027	82.6209	-1.3294	-0.410774	0.0011534	0.0180553	63.8361	-3.25016
PRDX4	1098.63	1030.03	1009.32	883.553	1.15935	0.213321	0.00117185	0.0183237	1005.38	3.24564
CORO1C	4267.69	4563.25	4579.48	4929.93	-1.07671	-0.106631	0.00117396	0.0183363	4585.09	-3.24513
ASH2L	665.294	650.614	581.51	574.531	1.12276	0.167055	0.00120188	0.0187514	617.987	3.23843
SNX3	1999.63	2015.2	2111.4	2194.79	-1.08288	-0.114878	0.00120394	0.0187627	2080.25	-3.23795
E2F3	353.676	359.079	368.987	411.74	-1.14572	-0.196249	0.00121302	0.0188623	373.37	-3.2358
PGRMC1	4407.79	4314.96	4710.16	4710.46	-1.0933	-0.128688	0.00121175	0.0188623	4535.85	-3.2361
RARRES2	80.6953	126.778	96.5778	184.098	-1.299	-0.377403	0.00123862	0.0192391	122.037	-3.22983
MOCOS	682.126	691.003	603.337	594.206	1.15972	0.213781	0.00124163	0.0192645	642.668	3.22914
SNHG8	827.408	776.103	783.432	676.134	1.13094	0.17752	0.00124575	0.019307	765.769	3.22819
PLCD3	1912.97	1616.18	2021.47	1813.04	-1.10061	-0.138302	0.00125795	0.0194746	1840.92	-3.2254
C1orf51	112.272	98.0634	94.4999	74.8633	1.23424	0.303621	0.00126998	0.0196392	94.9247	3.22268
UBB	4352.19	4011.91	4566.83	4368.87	-1.08582	-0.118779	0.00128396	0.0198334	4324.95	-3.21954
CYBRD1	14419.9	18888.4	15858.3	21067	-1.10181	-0.139873	0.00129809	0.0200279	17558.4	-3.2164
MAP4K3	803.031	806.117	742.249	709.826	1.12407	0.168735	0.0012994	0.0200279	765.306	3.21611
NR1D2	1740.86	1532.44	1858.82	1715.94	-1.10975	-0.150233	0.0013032	0.0200644	1712.02	-3.21527
ARHGAP21	4579.05	4422.31	4814.03	4704.65	-1.05856	-0.0821024	0.00132204	0.0203321	4630.01	-3.21115
BDKRB1	44.1483	35.5886	72.0482	53.8956	-1.2809	-0.357154	0.00133051	0.020433	51.4202	-3.20932
NEO1	989.56	994.932	934.09	894.676	1.09968	0.137079	0.00133151	0.020433	953.315	3.2091
BMP2	43.9825	55.5809	74.5108	82.3749	-1.27985	-0.355976	0.00133825	0.0204335	64.1123	-3.20765
MARC1	25.2104	31.6704	21.8228	17.0101	1.28806	0.365203	0.00133583	0.0204335	23.9284	3.20817
RGS3	406.136	422.011	474.39	503.562	-1.15721	-0.210654	0.00133638	0.0204335	451.525	-3.20805
TLR4	82.5121	97.8389	79.3919	69.686	1.26811	0.342675	0.00133883	0.0204335	82.3572	3.20752
TNFRSF11B	4804.08	5953.54	5466.82	7003.66	-1.18041	-0.239292	0.00133381	0.0204335	5807.03	-3.2086
ATL1	269.719	253.303	233.812	212.91	1.16618	0.221791	0.00135514	0.0206152	242.436	3.20404
EIF2AK3	482.521	515.495	445.462	448.628	1.13854	0.187182	0.00135497	0.0206152	473.026	3.20408
MAP1A	7038.11	6414.51	7501.75	7114.28	-1.10665	-0.146203	0.00135453	0.0206152	7017.17	-3.20417
IGF2R	6028.32	6434.02	5690.5	6043.2	1.07578	0.105385	0.00137245	0.0208558	6049.01	3.20038
TMEM123	2217.74	2479.03	2426.18	2664.91	-1.07364	-0.102511	0.0013743	0.0208614	2446.97	-3.19999
SLC40A1	133.467	221.095	238.649	422.084	-1.31975	-0.40026	0.00137638	0.0208704	253.824	-3.19956
ZNF219	668.516	863.68	483.449	722.863	1.20409	0.26794	0.00137888	0.0208858	684.627	3.19904
TRMT2B	184.461	179.356	230.573	226.341	-1.21333	-0.278975	0.00138701	0.0209636	205.183	-3.19734
ZHX2	612.917	650.908	722.668	746.451	-1.12735	-0.172931	0.00138679	0.0209636	683.236	-3.19739
SCARB1	419.561	426.63	331.341	354.935	1.1602	0.21437	0.00139121	0.0210044	383.117	3.19647
PRKD1	440.212	514.486	400.103	449.07	1.13894	0.187691	0.00140585	0.0212027	450.968	3.19345
RASD1	140.206	144.512	101.983	107.169	1.26678	0.341161	0.00143616	0.0216364	123.467	3.18728
CUTC	254.247	276.029	254.646	234.92	1.1719	0.228848	0.00144213	0.0216929	254.961	3.18608
DERL1	1073.6	1154.42	971.204	1056.44	1.09645	0.132843	0.001443	0.0216929	1063.92	3.18591
TNIK	69.6716	60.7598	100.558	84.6671	-1.24354	-0.314447	0.00144484	0.0216974	78.914	-3.18554
HDAC9	62.0844	83.2208	76.3902	114.194	-1.25888	-0.332137	0.00146579	0.0219884	83.9723	-3.18137
DANCR	302.628	263.049	263.885	219.823	1.17329	0.230561	0.00147454	0.0220489	262.346	3.17965
MMP27	15.2773	18.7552	30.4328	35.0388	-1.28187	-0.358254	0.00147241	0.0220489	24.8761	-3.18007
SEL1L3	553.134	529.664	456.293	428.315	1.21151	0.276801	0.00147394	0.0220489	491.852	3.17977
ANKH	616.192	651.421	669.209	733.829	-1.12063	-0.164305	0.00148692	0.0222104	667.663	-3.17722
TGFBR3	4130.42	4771.33	4722.76	5367.59	-1.11632	-0.158752	0.00151703	0.022636	4748.02	-3.17141
TPP2	931.164	939.642	1035.48	1042.96	-1.10392	-0.142631	0.00152502	0.022731	987.313	-3.16988
FAM86JP	45.8891	39.9288	59.8351	57.2077	-1.27178	-0.346851	0.00152798	0.0227509	50.7152	-3.16932
SCARA3	1133.73	906.385	1352.04	1078.4	-1.17356	-0.230891	0.00152975	0.0227533	1117.64	-3.16898
TSPAN18	51.9469	65.0262	35.3419	41.1332	1.29144	0.368976	0.00153146	0.0227545	48.3621	3.16865
HECTD1	2877.82	2779.98	3031.45	3033.92	-1.08724	-0.12067	0.00153556	0.0227913	2930.8	-3.16788
IL20RA	18.8643	20.7051	27.7693	38.8804	-1.2923	-0.369939	0.00154377	0.0228889	26.5548	-3.16633
F2R	1361.5	1234.01	1573.47	1451.06	-1.1768	-0.234867	0.00155683	0.0230339	1405.01	-3.16388
ST3GAL1	975.64	977.747	844.447	841.902	1.14396	0.194034	0.00155593	0.0230339	909.934	3.16405
ENTPD1	15.7354	22.7143	10.805	11.5767	1.27773	0.353584	0.00156083	0.0230461	15.2079	3.16313
TP53I3	551.028	421.658	610.522	481.216	-1.13433	-0.181837	0.00156094	0.0230461	516.106	-3.16311
AC005280.1	26.2178	16.8414	21.2901	1.70174	1.00557	0.00801079	0.00158009	0.0233042	16.5128	3.15956
DHCR7	3560.08	3302.18	3051.86	2912.58	1.11541	0.157576	0.00158333	0.0233275	3206.68	3.15896
ENDOD1	884.367	980.414	792.408	827.821	1.15607	0.209223	0.00159297	0.0234233	871.253	3.15719
FILIP1L	580.937	613.731	640.137	714.519	-1.15025	-0.201953	0.00159345	0.0234233	637.331	-3.1571
TRIM5	630.645	628.381	690.991	706.127	-1.12014	-0.163681	0.00159484	0.0234233	664.036	-3.15685
NAMPT	1155.7	1187.52	1049.8	1040.1	1.12875	0.174723	0.00159666	0.0234255	1108.28	3.15652
SERPINB6	1851.07	1597.33	2146.29	1766.58	-1.09354	-0.129004	0.00159849	0.0234279	1840.32	-3.15618
TACC2	308.914	314.716	380.242	371.73	-1.16295	-0.21779	0.00160038	0.0234311	343.9	-3.15584
MAML2	902.727	820.876	767.115	736.742	1.11095	0.151797	0.0016021	0.0234318	806.865	3.15552
ANTXR1	7803.81	9474.23	6685.45	8512.95	1.11399	0.155734	0.0016071	0.0234559	8119.11	3.15462
CBS	2063.45	1969.16	1826.12	1756.4	1.13062	0.177119	0.00160695	0.0234559	1903.78	3.15464
C17orf100	16.0264	8.31652	21.9762	20.7883	-1.20417	-0.268042	0.00161194	0.0235021	16.7768	-3.15374
ADAMTS7	593.307	681.19	504.699	581.284	1.16718	0.223024	0.00161471	0.0235181	590.12	3.15324
CNIH1	968.573	1035.52	969.298	923.537	1.11168	0.152747	0.00162672	0.0236685	974.231	3.15107
CD99	9889.54	9390.46	9534.29	8801.35	1.06992	0.097505	0.00163666	0.0237884	9403.91	3.14929
GALNT10	1751.56	1771.46	1624.08	1615.64	1.09097	0.125612	0.00164549	0.0238673	1690.69	3.14772
GAS6	8167.29	10147.7	7182.52	8826.15	1.11643	0.158887	0.00164406	0.0238673	8580.9	3.14798
UXS1	663.003	741.529	603.245	649.204	1.11848	0.161533	0.00165214	0.023939	664.245	3.14654
AP1M1	990.539	935.501	925.073	864.456	1.09726	0.133907	0.00165394	0.0239403	928.892	3.14622
MSI2	545.475	512.266	475.354	442.338	1.15297	0.205349	0.00166237	0.0240376	493.858	3.14474
KIAA0368	2205.71	2083.18	1984.54	1909.35	1.08679	0.120079	0.00166872	0.0241044	2045.7	3.14362
SHROOM4	39.6242	35.6834	46.433	54.9328	-1.28267	-0.359151	0.00167955	0.024236	44.1683	-3.14173
PABPC1	19753.6	18628.5	20309.8	19792.2	-1.06033	-0.0845095	0.00168169	0.0242419	19621	-3.14135
TMOD1	31.5679	39.182	53.2833	66.1492	-1.29995	-0.378453	0.00168645	0.0242856	47.5456	-3.14052
CMAHP	44.8732	51.4145	42.9174	33.9643	1.2744	0.349817	0.00169137	0.0243247	43.2923	3.13967
SEMA3C	5728.59	7679.56	4599.92	6117.74	1.23262	0.301727	0.00169264	0.0243247	6031.45	3.13945
PITX1	676.247	650.793	794.85	769.25	-1.20322	-0.266906	0.00169775	0.0243483	722.785	-3.13857
SKIL	498.702	479.313	522.914	537.101	-1.11915	-0.162408	0.0016964	0.0243483	509.508	-3.1388
RPLP0P2	17.1634	7.24518	17.3168	16.3139	-1.21918	-0.285908	0.00171664	0.0245941	14.5098	-3.13532
CDK14	414.869	441.768	484.91	508.09	-1.13199	-0.178866	0.00172413	0.0246762	462.409	-3.13405
CHD3	3263.08	2974.21	3336.76	3178.37	-1.07339	-0.102169	0.00173186	0.0247426	3188.11	-3.13273
MSN	6901.88	6377.85	7042.18	6816.01	-1.07173	-0.0999478	0.0017323	0.0247426	6784.48	-3.13266
ZFAND5	3131.87	3126.7	3588.94	3476.44	-1.10259	-0.14089	0.00174618	0.0249155	3330.99	-3.13032
PRUNE2	1639.13	1860.79	1363.1	1613.63	1.20408	0.267935	0.001788	0.0254863	1619.16	3.12336
THSD4	1312.53	1384.96	1129.3	1205.23	1.13198	0.178846	0.00179503	0.0255606	1258.01	3.1222
AMFR	1454.52	1548.81	1359.66	1439.14	1.07938	0.110209	0.00180059	0.0255651	1450.53	3.12129
PRC1	160.576	120.297	190.877	157.664	-1.2358	-0.305449	0.00180012	0.0255651	157.353	-3.12137
ZDHHC12	226.363	204.459	211.345	168.023	1.18853	0.24918	0.00180082	0.0255651	202.547	3.12125
ZNF469	833.602	755.66	661.663	668.506	1.13985	0.188843	0.00181353	0.0257195	729.858	3.11918
C5AR1	28.8233	31.6135	22.3502	17.4727	1.25879	0.332033	0.00181687	0.0257408	25.0649	3.11864
CLTC	7996.41	7768.74	8424.58	8343.03	-1.07434	-0.103447	0.00181871	0.0257409	8133.19	-3.11834
SMC6	617.24	684.098	572.085	600.166	1.1406	0.189789	0.00182337	0.0257809	618.397	3.11759
CCDC13	16.6138	15.1291	13.7523	6.85772	1.23417	0.303539	0.00183909	0.025977	13.0882	3.11506
BCR	762.784	737.652	804.123	818.796	-1.10655	-0.146073	0.00184106	0.0259786	780.839	-3.11474
LPXN	407.479	349.642	537.249	436.513	-1.19257	-0.254073	0.00184442	0.0259999	432.721	-3.1142
IGSF8	442.744	490.51	366.609	422.936	1.15283	0.20518	0.00186237	0.0262266	430.7	3.11134
NTF3	108.248	106.916	150.704	140.03	-1.2364	-0.306149	0.00187375	0.0263603	126.475	-3.10955
IL7R	60.6878	49.8612	69.8333	63.7339	-1.247	-0.31846	0.00188933	0.0265528	61.0291	-3.1071
FAM211A-AS1	5859.07	5894.64	5581.98	5511.32	1.06686	0.0933715	0.0019052	0.0267491	5711.75	3.10463
CHCHD7	310.682	272.653	249.298	224.91	1.16967	0.226097	0.00191821	0.0268946	264.386	3.10261
DDX3X	3547.94	3816.58	3907.87	4066.12	-1.06323	-0.0884533	0.00192324	0.0268946	3834.63	-3.10184
MCF2L	78.2933	67.4499	102.699	103.614	-1.28046	-0.35666	0.00192062	0.0268946	88.0143	-3.10224
NDFIP2	1050.63	1108.33	1238.44	1278.17	-1.14042	-0.18957	0.00192151	0.0268946	1168.89	-3.1021
RPN2	4086.72	3908.79	3746.48	3503.68	1.10207	0.140216	0.00192835	0.0269124	3811.42	3.10105
TPP1	3579.99	3595.81	3832.46	3942.76	-1.08881	-0.122751	0.00192776	0.0269124	3737.75	-3.10114
GALNT5	1075.68	988.522	1159.85	1068.95	-1.11005	-0.150629	0.00196465	0.0273696	1073.25	-3.09553
GDF1	16.5246	18.9257	17.2153	37.1535	-1.29869	-0.377057	0.00196696	0.0273696	22.4548	-3.09518
LRIG1	283.249	281.248	334.089	339.235	-1.18814	-0.248707	0.00196622	0.0273696	309.455	-3.09529
SYNE1	1828.78	1877.61	1955.43	2156.13	-1.13321	-0.180418	0.0019836	0.0275738	1954.49	-3.09268
TM9SF2	2536.8	2702.12	2424.2	2519.1	1.07131	0.0993714	0.00199083	0.0276469	2545.56	3.0916
PIGK	949.028	998.744	893.485	887.434	1.12714	0.172672	0.00199496	0.0276769	932.173	3.09098
AC096677.1	32.9475	42.6547	35.3736	25.9814	1.2714	0.346423	0.00200413	0.0277767	34.2393	3.08962
ARMCX3	1982.7	2028.72	2076.78	2195.51	-1.08163	-0.113202	0.0020131	0.0278735	2070.93	-3.08829
FHOD3	491.622	579.383	607.791	716.104	-1.19435	-0.256225	0.00202452	0.0279896	598.725	-3.08661
RPL12	8293.92	8303.67	7995.23	7814.54	1.05505	0.0773077	0.00202748	0.0279896	8101.84	3.08618
ZFAS1	841.343	962.093	795.435	863.061	1.10438	0.143241	0.00202646	0.0279896	865.483	3.08633
H6PD	2372.27	2478.2	2166.46	2283.42	1.08985	0.124126	0.00202964	0.0279919	2325.09	3.08586
MYADM	4478.06	4146.49	3830.75	3781.66	1.09312	0.128454	0.00203573	0.0280483	4059.24	3.08497
MAGI2	319.007	303.296	328.402	347.787	-1.14286	-0.192649	0.00204051	0.0280866	324.623	-3.08427
BCAS1	24.9444	33.6278	40.3309	65.9723	-1.3288	-0.410119	0.00205558	0.0282127	41.2188	-3.08208
DPY19L1	782.402	867.415	869.057	964.483	-1.10369	-0.142338	0.00205524	0.0282127	870.839	-3.08213
RP11-426C22.4	44.9983	39.0805	65.473	54.9338	-1.26166	-0.335323	0.00205571	0.0282127	51.1214	-3.08206
HERC3	571	585.449	622.353	671.904	-1.1301	-0.176444	0.00207155	0.0284023	612.677	-3.07978
RNF38	482.77	515.135	430.44	456.3	1.12298	0.167326	0.00208157	0.0285119	471.161	3.07834
KRT7	748.234	815.84	590.909	668.304	1.19598	0.25819	0.00209099	0.028585	705.822	3.07699
TTC39B	242.965	235.934	210.852	195.72	1.17576	0.233589	0.00208897	0.028585	221.368	3.07728
PTK2	1171.35	1166.91	1239.84	1269.01	-1.08674	-0.120008	0.00209473	0.0286083	1211.78	-3.07646
CACNA2D1	786.151	826.069	702.294	749.067	1.10245	0.140708	0.00210337	0.0286785	765.895	3.07523
KLF8	175.413	169.748	159.138	133.711	1.21327	0.2789	0.00210396	0.0286785	159.502	3.07515
SURF4	4036.02	3992.95	3715.54	3783.15	1.05178	0.0728298	0.00210803	0.028706	3881.91	3.07458
SEC62	2287.21	2471.55	2073.11	2246.15	1.09445	0.130208	0.00214123	0.0291299	2269.5	3.06991
COX17	84.7027	108.454	74.7342	81.7581	1.23805	0.308071	0.00216695	0.0294512	87.4124	3.06634
RP2	349.322	347.842	402.443	407.163	-1.15602	-0.209171	0.00217254	0.0294986	376.693	-3.06557
ATP1B3	1176.72	1250.74	1253.78	1366.06	-1.08928	-0.123379	0.00218017	0.0295735	1261.83	-3.06452
ACKR4	1329.21	1879.87	1873.89	2439.02	-1.22405	-0.291668	0.0022008	0.0298245	1880.5	-3.06171
FAM20A	275.608	261.293	352.147	328.597	-1.19319	-0.25482	0.00222459	0.0301179	304.411	-3.05848
AC007246.3	145.502	127.061	124.318	100.658	1.20525	0.269331	0.00222985	0.03015	124.385	3.05778
AIF1L	100.763	119.822	116.721	163.602	-1.24011	-0.310463	0.00223126	0.03015	125.227	-3.05759
G0S2	67.8805	69.8456	48.778	51.9676	1.25661	0.329541	0.00224778	0.0303439	59.6179	3.05538
GREM2	597.45	575.912	749.71	689.742	-1.1757	-0.233524	0.00225036	0.0303496	653.204	-3.05503
TAGLN2	3161.71	3069.56	3342.56	3312.62	-1.0783	-0.108752	0.00225399	0.0303694	3221.61	-3.05455
RP11-49I11.1	54.9302	43.4341	46.4422	28.8201	1.2621	0.335825	0.00226087	0.0304328	43.4067	3.05363
GRIA3	412.776	443.912	487.568	513.459	-1.14312	-0.192983	0.00230169	0.0309525	464.429	-3.04826
SAR1A	2522.75	2451.68	2666.59	2608.53	-1.06369	-0.0890787	0.00231496	0.0311011	2562.39	-3.04653
DES	196.406	244.104	163.183	169.347	1.24041	0.310819	0.00234739	0.0315067	193.26	3.04235
CTSA	7346.69	6986.51	7454.37	7473.28	-1.06027	-0.0844356	0.00237305	0.0318114	7315.21	-3.03908
PYGL	1469.47	1540.05	1315.79	1361.88	1.12544	0.170492	0.00237463	0.0318114	1421.8	3.03888
CTSZ	2815.42	2789.82	2790.23	2596.75	1.07244	0.100902	0.00238048	0.0318594	2748.06	3.03813
RNF150	387.376	447.189	457.89	533.208	-1.16806	-0.224118	0.00239557	0.0320308	456.416	-3.03623
CALM2	5168.38	5105.5	5430.39	5463.71	-1.08075	-0.112038	0.00239982	0.032057	5292	-3.0357
GUCY1A2	309.008	495.629	363.315	599.86	-1.18977	-0.250677	0.00241025	0.0321657	441.953	-3.03439
SPG20	1701.71	1786.66	1577.16	1634.53	1.08687	0.120173	0.00241899	0.0322517	1675.01	3.03329
TMEM44	333.028	303.623	311.239	258.265	1.15558	0.208614	0.00242322	0.0322774	301.539	3.03277
TGFBR2	3742.31	3965.19	3496.92	3714.55	1.06431	0.0899136	0.00245625	0.0326864	3729.74	3.02868
MEDAG	600.125	674.625	701.579	807.496	-1.15983	-0.213911	0.00246068	0.0327142	695.956	-3.02814
LINC00842	29.1695	26.0813	40.4945	41.834	-1.27509	-0.3506	0.00246534	0.0327452	34.3948	-3.02756
LONRF1	356.139	377.115	301.251	316.483	1.15605	0.20921	0.00248056	0.0329161	337.747	3.0257
CLIC1	4340.12	4026.46	4478.57	4373.48	-1.08711	-0.120499	0.00251184	0.0332996	4304.66	-3.02191
RPL36	2642.41	2753.84	2704.61	2523.82	1.09279	0.12802	0.0025351	0.0335763	2656.17	3.01912
ANO4	186.037	176.465	246.52	212.939	-1.19087	-0.252014	0.00254632	0.0336931	205.49	-3.01778
CTD-2031P19.4	23.9371	22.5267	24.5908	36.8924	-1.27198	-0.347076	0.00256089	0.0338221	26.9868	-3.01605
SPON2	1597.72	1564.16	1232.84	1258.49	1.18091	0.239896	0.00255856	0.0338221	1413.3	3.01633
FRS2	598.644	621.489	684.162	696.336	-1.11089	-0.151714	0.00257623	0.0339926	650.158	-3.01424
ALDH4A1	410.784	411.388	406.741	485.207	-1.14985	-0.201441	0.00257937	0.0340021	428.53	-3.01387
PLEKHM1	859.937	837.399	967.685	936.075	-1.10577	-0.14505	0.00258489	0.0340429	900.274	-3.01322
GPR153	705.064	839.545	765.717	964.931	-1.14199	-0.191552	0.00259073	0.0340877	818.814	-3.01254
FNDC3A	2161.95	2161.14	1903.8	1975.33	1.09152	0.126335	0.00260247	0.0342102	2050.56	3.01117
NR4A3	60.4875	76.0921	87.3275	107.978	-1.25704	-0.330029	0.00261448	0.0343359	82.9712	-3.00977
GOLGA4	1865.14	1904.84	2014.57	2086.22	-1.09235	-0.12744	0.00262118	0.0343917	1967.69	-3.00899
CITED4	46.3597	40.9504	34.2658	24.2074	1.26554	0.339756	0.00262548	0.0344031	36.4458	3.00849
KDELR1	3787.38	3429.2	3578.33	3219.27	1.06307	0.0882311	0.00262911	0.0344031	3503.54	3.00807
TBC1D1	686.69	631.364	718.58	702.973	-1.11427	-0.156098	0.00262941	0.0344031	684.902	-3.00804
INHBA	762.444	709.017	880.374	825.192	-1.17145	-0.22829	0.00263994	0.0344994	794.257	-3.00682
NAPEPLD	178.04	206.235	143.244	168.67	1.18675	0.24701	0.00264169	0.0344994	174.047	3.00662
FAM73A	367.481	389.442	349.758	335.015	1.14981	0.201401	0.0026885	0.0350781	360.424	3.00128
ANO6	2673.56	2850.02	2496.06	2652.16	1.07545	0.104945	0.00271681	0.0354145	2667.95	2.99809
DZIP1	856.391	881.586	943.635	980.316	-1.10371	-0.142361	0.00272757	0.0355218	915.482	-2.99688
YWHAZ	7765.33	7653.62	8460.82	8134.46	-1.06325	-0.0884829	0.00274282	0.0356872	8003.56	-2.99518
KDELR3	1500.7	1319.18	1340.14	1191.66	1.09554	0.131647	0.00274837	0.0357263	1337.92	2.99456
ARRDC1	369.017	364.852	278.203	288.963	1.19686	0.259259	0.00278751	0.0362015	325.259	2.99025
CUL4B	1454.15	1374.06	1619.05	1512.72	-1.09152	-0.12634	0.00279493	0.0362643	1489.99	-2.98944
FGD6	103.483	85.0327	132.144	111.455	-1.22071	-0.287721	0.00280686	0.0363519	108.029	-2.98813
NXN	1608.35	1442.29	1440.88	1282.57	1.12009	0.163611	0.0028043	0.0363519	1443.52	2.98841
AC008063.2	24.1743	19.6317	32.5226	32.7305	-1.26277	-0.336593	0.00282376	0.0365369	27.2648	-2.9863
AGPAT4	242.044	257.282	228.717	217.365	1.17008	0.226612	0.00286182	0.0369952	236.352	2.9822
GIT2	1234.63	1273.7	1309.89	1377.24	-1.07528	-0.104706	0.00289693	0.0374146	1298.87	-2.97847
ABCC4	723.047	674.614	632.758	582.354	1.14041	0.189556	0.00290435	0.0374761	653.193	2.97768
PLXDC2	70.8681	86.7918	51.2856	59.4614	1.25546	0.328213	0.00291055	0.0375215	67.1017	2.97703
ESR1	50.0511	43.2885	71.8335	61.6628	-1.24426	-0.315287	0.00291648	0.0375634	56.709	-2.97641
PLP2	1530.23	1336.77	1386.3	1182.4	1.12055	0.164202	0.00293174	0.0377252	1358.93	2.97481
SLC7A11	4395.6	4792.39	3856.68	4298.79	1.10671	0.146281	0.00294937	0.0379174	4335.86	2.97297
APOE	78.9929	84.2107	48.4127	54.0509	1.2643	0.338344	0.00297711	0.0382389	66.4168	2.97009
ADCY6	1132.55	1272.42	1041.34	1132.26	1.10662	0.146154	0.00301044	0.0385964	1144.64	2.96667
ANP32A	609.266	602.257	668.727	675.646	-1.11663	-0.159149	0.0030089	0.0385964	638.974	-2.96683
DCN	46400.4	54475.6	44026.3	51284.3	1.08919	0.123255	0.00301483	0.0386126	49046.7	2.96622
OGFRL1	871.617	947.115	831.016	820.102	1.14663	0.197405	0.00301721	0.0386126	867.462	2.96598
UBE2L3	1437.28	1401.2	1443.95	1517.07	-1.07657	-0.106443	0.00302661	0.0386975	1449.88	-2.96502
ADAMTS12	411.614	388.924	446.844	451.273	-1.14718	-0.198094	0.00304823	0.0389385	424.664	-2.96283
ERO1L	1356.97	1474.05	1325.55	1337.26	1.10043	0.138074	0.00307712	0.0392361	1373.46	2.95993
PAPLN	102.347	103.094	99.3494	77.7849	1.23319	0.302397	0.00307509	0.0392361	95.6438	2.96013
RARRES1	33.7926	21.7809	18.764	10.7878	1.21917	0.285894	0.00308686	0.0393245	21.2813	2.95895
CXCL12	3993	3371.92	4909.5	3752.19	-1.11616	-0.158544	0.00310013	0.0394387	4006.65	-2.95763
RB1CC1	1163.59	1185	1261.41	1291.68	-1.08492	-0.117586	0.00310145	0.0394387	1225.42	-2.9575
DOCK8	31.9026	32.2286	18.7051	19.13	1.25268	0.325015	0.0031098	0.0395091	25.4916	2.95667
CCDC50	1462.45	1488.23	1578.26	1630.15	-1.08824	-0.122	0.00311687	0.0395273	1539.77	-2.95597
PLOD2	697.554	772.89	622.977	646.265	1.14538	0.195826	0.00311445	0.0395273	684.922	2.95621
SCRN1	3592.87	3558.01	3698.58	3768.35	-1.05981	-0.0838051	0.00313832	0.0397634	3654.45	-2.95385
RNF20	664.494	695.522	699.477	770.879	-1.10901	-0.149275	0.00315763	0.0399719	707.593	-2.95196
ATG9A	1335.61	1378.46	1269.34	1278.6	1.0851	0.117833	0.00317242	0.0401229	1315.5	2.95052
C1RL	751.475	666.367	647.024	570.643	1.14131	0.19069	0.00319465	0.0403639	658.877	2.94836
ERMP1	347.359	367.115	328.806	306.639	1.15512	0.208047	0.00320011	0.0403639	337.48	2.94783
ZNF330	343.764	341.762	370.557	386.51	-1.12493	-0.169837	0.00319744	0.0403639	360.648	-2.94809
CDR2	685.831	691.394	642.553	623.044	1.09889	0.136053	0.00321558	0.0405227	660.705	2.94634
AP3M2	209.703	221.664	246.58	269.142	-1.16947	-0.225849	0.00323228	0.0406601	236.772	-2.94474
MTMR3	870.469	894.799	918.014	977.571	-1.08651	-0.119698	0.00323025	0.0406601	915.213	-2.94493
MED13L	1583	1592.36	1684.9	1702.99	-1.07251	-0.100987	0.00324032	0.0407247	1640.81	-2.94397
ABHD5	225.767	213.745	231.362	253.262	-1.15636	-0.209596	0.00326998	0.0410607	231.034	-2.94115
FEM1B	1200.2	1260.53	1158.98	1141.98	1.10249	0.140762	0.00328257	0.0411818	1190.42	2.93996
KDM3B	1166.23	1175.5	1197.48	1266.74	-1.07856	-0.109111	0.00329393	0.0412874	1201.49	-2.93889
TOP2A	224.996	158.702	273.064	216.522	-1.23082	-0.299623	0.00331454	0.0415086	218.321	-2.93695
AHRR	1917.6	1784.89	2150.63	1974.5	-1.10686	-0.146479	0.0033282	0.0416426	1956.9	-2.93568
PVRL1	243.466	254.057	287.062	304.818	-1.15867	-0.212473	0.00333792	0.0416989	272.351	-2.93477
UGDH	1541.95	1638.38	1432.08	1498.27	1.09299	0.128276	0.00333865	0.0416989	1527.67	2.93471
PIK3IP1	456.927	432.375	566.602	521.055	-1.1696	-0.226014	0.00334443	0.041734	494.24	-2.93417
FBXO34	258.133	243.879	275.43	282.424	-1.14201	-0.19158	0.00335296	0.0417661	264.966	-2.93338
RAB7A	4069.78	4282.25	4252.84	4618.72	-1.07064	-0.0984801	0.00335171	0.0417661	4305.9	-2.93349
TM2D1	303.483	310.403	259.604	268.629	1.13993	0.188941	0.00336537	0.0418834	285.53	2.93223
PLA2G4A	162.225	196.522	203.535	239.743	-1.19283	-0.254384	0.00337999	0.0420281	200.506	-2.93088
ITPKC	675.087	631.754	573.762	546.575	1.14095	0.190239	0.00341905	0.0424762	606.795	2.92731
OMG	14.0624	18.6208	29.079	31.4674	-1.24794	-0.319553	0.00342351	0.0424939	23.3074	-2.92691
FGF10	56.828	53.8246	41.1727	36.0044	1.25812	0.331272	0.00345126	0.0428005	46.9575	2.9244
ST7	367.777	424.79	491.893	510.253	-1.16339	-0.218335	0.00346022	0.0428737	448.678	-2.92359
PCGF5	926.721	979.374	832.887	881.632	1.11087	0.15169	0.00347086	0.0429675	905.154	2.92263
HSPA5	7078.86	7523.28	6307.5	6859.93	1.08017	0.111264	0.00348904	0.0431545	6942.39	2.92101
FMN2	533.063	483.823	575.579	537.245	-1.11545	-0.15762	0.00349651	0.0432088	532.427	-2.92034
ASNS	1057.96	1056.12	921.099	861.609	1.18136	0.24045	0.00351143	0.043355	974.197	2.91901
MAFF	748.605	720.245	829.242	864.129	-1.16147	-0.215957	0.00351898	0.04341	790.555	-2.91834
GK5	211.709	245.313	206.995	205.872	1.16649	0.222178	0.0035329	0.0435435	217.472	2.91711
APBB2	882.723	817.192	736.271	726.368	1.12385	0.168456	0.00354194	0.0436166	790.638	2.91631
MFGE8	12826.8	14165.1	11536.9	12682.4	1.11413	0.155913	0.0036022	0.0443197	12802.8	2.91105
C9orf3	300.3	286.782	281.183	245.027	1.14893	0.200288	0.00362248	0.0445301	278.323	2.90929
OAF	4866.08	4264.72	5313.57	4886.55	-1.12246	-0.166669	0.00362698	0.0445465	4832.73	-2.9089
FOSL2	1747.89	1762.57	1557.89	1574.03	1.10273	0.141084	0.00365333	0.0447549	1660.59	2.90664
SLC25A46	988.095	996.916	1131.6	1095.55	-1.0913	-0.126053	0.0036488	0.0447549	1053.04	-2.90703
SPRY2	374.803	343.079	478.898	441.296	-1.20204	-0.265487	0.00365353	0.0447549	409.519	-2.90662
RSPO2	25.2661	28.0794	15.2133	15.3836	1.25613	0.32899	0.00368244	0.0450697	20.9856	2.90416
FAM129A	2675.65	2502.02	2224.59	2073.94	1.17608	0.233987	0.00369109	0.0451361	2369.05	2.90342
PBXIP1	2034.65	1923.98	1908.32	1768.06	1.08019	0.111287	0.00370338	0.045247	1908.75	2.90238
MAN2B2	2283.08	2604.79	2175.14	2404.5	1.09417	0.129833	0.00370706	0.0452526	2366.88	2.90207
CCDC93	821.063	846.421	860.564	935.426	-1.10055	-0.138225	0.00371952	0.0453652	865.869	-2.90102
PAQR5	116.107	108.722	153.636	140.118	-1.22358	-0.291109	0.00372669	0.0454131	129.646	-2.90042
PKD1L2	311.186	307.756	276.807	259.731	1.16778	0.223769	0.00375604	0.0457311	288.87	2.89796
FAM47E-STBD1	108.686	170.482	114.461	112.232	1.25785	0.330955	0.0037627	0.0457725	126.466	2.8974
ANXA5	14535.8	13733.3	15638.1	14828.3	-1.06565	-0.0917277	0.00380075	0.0461953	14683.9	-2.89424
C17orf103	980.49	1039.9	1094.41	1205.42	-1.13129	-0.177974	0.00380575	0.046216	1080.05	-2.89383
S100A11	4985.56	4826.81	5239.08	5160.14	-1.06593	-0.0921155	0.0038218	0.0463707	5052.89	-2.89251
PACSIN2	856.615	818.229	731.654	736.798	1.10175	0.139797	0.00385458	0.0467281	785.824	2.88982
CDK4	1206.94	1124.72	1258.75	1242.53	-1.09548	-0.131563	0.00385929	0.0467448	1208.24	-2.88944
RP11-175K6.1	173.871	182.754	142.725	143.356	1.21488	0.280817	0.0038649	0.0467723	160.677	2.88898
FXYD1	154.015	165.843	167.96	206.954	-1.20168	-0.265052	0.00388571	0.0469835	173.693	-2.88729
SNTA1	449.972	399.923	494.02	476.589	-1.1487	-0.200003	0.00390972	0.0472332	455.126	-2.88536
CCDC51	237.197	264.167	213.569	226.819	1.15131	0.203276	0.00393956	0.047471	235.438	2.88296
CDK19	562.669	479.435	604.389	541.695	-1.12078	-0.164503	0.00393615	0.047471	547.047	-2.88323
SPSB1	360.739	357.715	419.402	424.77	-1.16668	-0.222406	0.00393646	0.047471	390.657	-2.88321
TSPAN10	60.0257	53.5225	78.8587	71.4055	-1.22809	-0.296413	0.00394859	0.047539	65.9531	-2.88224
CLIP4	1230.99	1237.24	1404.63	1351.88	-1.08841	-0.122227	0.0039738	0.0478015	1306.19	-2.88023
CIT	1033.53	847.316	1451.4	1130.57	-1.22095	-0.288004	0.00398564	0.0478619	1115.71	-2.8793
DPY19L2P2	31.1642	38.8572	26.1537	25.3117	1.26403	0.338036	0.00398406	0.0478619	30.3717	2.87942
HDAC5	1645.81	1532.8	1681.94	1705.92	-1.10528	-0.144407	0.00399809	0.0479702	1641.62	-2.87831
XPC	1352.05	1258.14	1559.5	1394.79	-1.1007	-0.138416	0.00403309	0.0483488	1391.12	-2.87556
HERC4	1366.89	1408.39	1569	1557.16	-1.09444	-0.130188	0.0040649	0.0486885	1475.36	-2.87308
ZDHHC2	1045.27	1098.19	1096.42	1187.4	-1.08818	-0.121918	0.00406871	0.0486926	1106.82	-2.87278
TWF2	914.712	843.758	902.223	771.703	1.09204	0.127022	0.0041286	0.0493672	858.099	2.86816
GPD2	518.923	479.571	581.895	540.683	-1.12155	-0.165496	0.00413776	0.0494346	530.268	-2.86746
CENPF	106.13	63.2021	150.866	94.2989	-1.24407	-0.315063	0.00416328	0.0496201	103.624	-2.86552
ID2	1041.59	1220.22	943.392	1090.6	1.11722	0.159917	0.00416215	0.0496201	1073.95	2.8656
P4HB	13912	12033	13062.7	11088.1	1.08358	0.115809	0.0041639	0.0496201	12524	2.86547
SRSF10	1035.76	1062.29	1151.03	1142.14	-1.07553	-0.105045	0.00417059	0.0496576	1097.8	-2.86496

## Sheet: GSF-F_72h_2
up-regulated														down-regulated
	GSF.F_DHT_48h mean	GSF.F_DHT_72h mean	GSF.F_EtOH_48h mean	GSF.F_EtOH_72h mean	FoldChange	log2FoldChange	pvalue	padj	Overall mean	stat					GSF.F_DHT_48h mean	GSF.F_DHT_72h mean	GSF.F_EtOH_48h mean	GSF.F_EtOH_72h mean	FoldChange	log2FoldChange	pvalue	padj	Overall mean	stat
AOX1	2198.49	2356.67	983.524	962.964	2.32481	1.21711	1.64233e-126	2.30354e-122	1625.41	23.926				MFAP4	1536.29	1502.17	2405.09	2534.78	-1.65069	-0.723069	1.14167e-35	1.45574e-32	1994.58	-12.4662
FAM107A	386.643	470.761	59.1724	79.7724	3.87364	1.95369	3.30872e-84	2.32041e-80	249.087	19.4435				LITAF	2613.28	2613.3	3262.52	3262.13	-1.24502	-0.316164	8.24502e-29	5.78223e-26	2937.81	-11.1374
APOD	1001.5	1246.56	316.031	352.076	2.8328	1.50223	8.22407e-65	3.84503e-61	729.043	16.9999				PRELP	2929.43	3452.36	4549.9	5681.15	-1.57727	-0.65743	1.59197e-28	1.06328e-25	4153.21	-11.0787
CAT	2388.96	2221.26	1444.11	1243.62	1.71138	0.775161	1.61247e-49	5.65411e-46	1824.49	14.7935				RHOJ	621.129	810.071	989.693	1310.04	-1.56032	-0.641841	2.32912e-27	1.42036e-24	932.732	-10.8358
CERS6	750.648	895.315	357.541	388.172	2.10562	1.07425	3.74509e-49	1.05057e-45	597.919	14.7367				CD36	90.9401	127.811	222.034	322.866	-2.06058	-1.04305	3.1373e-27	1.83349e-24	190.913	-10.8085
SULF1	9326.86	7341.7	6334.04	4273.03	1.77021	0.823925	4.57687e-40	1.06992e-36	6818.91	13.2489				SACS	1692.65	1560.75	2130.48	2152.82	-1.37223	-0.456521	2.75109e-25	1.48411e-22	1884.17	-10.3901
ADAMTS1	7090.89	6720.91	4092.41	3677.72	1.74914	0.806644	6.64031e-39	1.33053e-35	5395.48	13.0467				ADCY4	251.898	232.052	378.071	412.853	-1.64067	-0.714282	2.37606e-19	7.57422e-17	318.718	-8.99436
PSMD8	1941.57	1952.45	1370.51	1467.18	1.32208	0.402815	1.31964e-36	2.31366e-33	1682.93	12.637				DRAM1	2322.41	2422.53	3040.09	3398.78	-1.3698	-0.453962	7.74603e-19	2.26345e-16	2795.95	-8.86362
SAMHD1	899.338	833.142	428.939	443.816	1.73093	0.791549	7.57174e-36	1.18001e-32	651.309	12.4989				SOCS2	186.662	147.413	346.009	280.813	-1.69344	-0.759958	1.36373e-18	3.90128e-16	240.224	-8.80036
SLC12A2	1302.94	1436.17	813.721	876.645	1.56824	0.64915	1.01769e-35	1.42741e-32	1107.37	12.4753				SEPT11	13331.5	12609	15872.6	15473.2	-1.22549	-0.293361	5.44827e-18	1.44184e-15	14321.6	-8.64357
MYOCD	203.062	222.342	44.5982	31.0123	2.67957	1.422	1.47488e-35	1.72389e-32	125.254	12.4458				RGMB	2882.16	2823.82	4153.09	4124.56	-1.38395	-0.468794	2.58567e-17	6.59393e-15	3495.91	-8.46391
IMPA2	494.033	551.845	196.74	199.655	2.15335	1.10658	1.83778e-34	1.84119e-31	360.568	12.2427				KIAA0922	236.408	195.932	393.078	339.687	-1.5999	-0.677985	5.48685e-17	1.35015e-14	291.276	-8.37576
REV3L	3863.13	3868.27	2856.15	2793.27	1.37588	0.460357	1.80557e-34	1.84119e-31	3345.2	12.2442				NPTX1	258.474	242.818	589.508	659.708	-1.84876	-0.886561	4.37717e-16	1.00646e-13	437.627	-8.12764
FAM105A	201.712	168.849	60.0178	42.5441	2.4691	1.30398	4.67532e-34	4.37174e-31	118.281	12.1667				MYO1D	1230.49	1317.25	1770.22	1909.14	-1.39875	-0.484139	2.92764e-15	6.22168e-13	1556.77	-7.89395
SLC38A11	382.739	318.286	127.5	106.483	2.17854	1.12336	4.2653e-31	3.73907e-28	233.752	11.597				NOV	1834.36	1926.46	2403.35	2623.36	-1.35931	-0.442876	7.58664e-15	1.47792e-12	2196.88	-7.7743
IDH1	3659.44	3490.46	2848.52	2684.9	1.2888	0.366025	5.55368e-31	4.32755e-28	3170.83	11.5744				SNX18	1498.93	1576.52	1871.74	1945.02	-1.21496	-0.280909	7.5268e-15	1.47792e-12	1723.05	-7.7753
PTPLB	878.854	1019.69	546.387	624.554	1.58094	0.660781	5.52454e-31	4.32755e-28	767.373	11.5749				MMP1	1743.82	973.955	3548.64	2405.75	-1.75793	-0.813881	7.83143e-15	1.50471e-12	2168.04	-7.77028
FKBP5	148.517	138.255	38.4695	32.6139	2.43367	1.28313	1.21699e-30	8.98397e-28	89.4639	11.507				L1CAM	187.171	185.974	284.33	289.666	-1.62673	-0.701976	6.31941e-14	1.10795e-11	236.785	-7.50129
GLUL	5307.03	5171.03	3537.4	3295.9	1.4951	0.580246	1.83681e-27	1.17105e-24	4327.84	10.8575				CSDC2	310.76	222.487	469.992	367.836	-1.55828	-0.639959	7.51446e-14	1.30121e-11	342.769	-7.47855
STEAP4	522.861	575.611	21.953	16.7914	1.50998	0.594534	1.03602e-26	5.81249e-24	284.304	10.6984				ELFN2	374.96	331.613	553.599	507.03	-1.4607	-0.546663	9.34276e-14	1.59807e-11	441.801	-7.44988
ERCC6	1425.13	1673.1	937.9	1096.35	1.48405	0.569536	6.48649e-25	3.36961e-22	1283.12	10.308				BMPER	424.71	409.185	563.99	576.201	-1.36637	-0.450351	2.48812e-13	4.05796e-11	493.522	-7.31955
NID1	5376.16	4759.07	3991.32	3319.43	1.42923	0.515239	7.83336e-25	3.92395e-22	4361.49	10.2898				STC1	155.517	102.45	360.811	205.598	-1.64955	-0.722069	2.83551e-13	4.57137e-11	206.094	-7.30199
DIO2	159.399	161.334	47.2557	38.6181	2.23803	1.16223	1.69979e-24	8.22113e-22	101.652	10.2149				IL1R1	1835.75	1888.85	2433.05	2555.62	-1.34249	-0.424914	4.53325e-13	7.06481e-11	2178.32	-7.2386
NR2F1	560.051	552.207	349.355	303.297	1.65221	0.724394	7.29643e-24	3.41132e-21	441.228	10.0727				BMP2K	588.919	643.951	744.209	854.213	-1.29596	-0.374023	5.40716e-13	8.24357e-11	707.823	-7.21465
IGFBP2	164.649	235.444	69.2276	86.5091	2.04337	1.03095	1.90224e-23	8.60672e-21	138.957	9.97802				LAMB1	7033.74	5148.69	8528.72	6614.07	-1.29956	-0.378027	9.60099e-13	1.44799e-10	6831.31	-7.13611
CTB-167B5.2	33.8687	63.0036	1.96019	1.57679	2.52857	1.33832	3.72675e-23	1.63348e-20	25.1023	9.91106				IL6ST	10157.2	10604.3	11856	12507.3	-1.17926	-0.237883	1.63296e-12	2.26771e-10	11281.2	-7.0627
PDLIM1	1174.07	956.48	773.781	615.895	1.51337	0.597766	4.19765e-23	1.78413e-20	880.056	9.89917				MXRA5	3087.71	2957.87	4150.29	4251.24	-1.37505	-0.459482	2.16405e-12	2.91855e-10	3611.78	-7.02348
DKK1	13242.5	11720.5	9522.73	8157.43	1.40618	0.491779	1.05729e-22	4.36165e-20	10660.8	9.80634				NR3C1	2239.85	2311.97	2676.2	2712.11	-1.16197	-0.216577	2.532e-12	3.35043e-10	2485.03	-7.00152
ADCY3	1601.58	1701.18	1216.89	1201.19	1.37416	0.458547	3.2681e-22	1.30967e-19	1430.21	9.69177				IGFBP4	18477.2	18755.6	21102.2	23459.3	-1.24698	-0.318434	3.07898e-12	4.03606e-10	20448.6	-6.97407
IRS2	2286.58	2254.2	1493.96	1547.01	1.44414	0.530208	3.51586e-22	1.36982e-19	1895.44	9.68431				NFASC	1815.73	1541.55	2132.81	2018.46	-1.28142	-0.35774	3.46055e-12	4.41252e-10	1877.14	-6.95763
GALNT2	3989.04	3867.27	3229.02	3111.15	1.24195	0.312609	8.64662e-22	3.27777e-19	3549.12	9.59191				IPO5	3817.97	3746.65	4419.67	4403.14	-1.17979	-0.238536	6.03044e-12	7.48522e-10	4096.85	-6.87893
SORBS1	104.332	128.829	42.4675	42.1856	2.06248	1.04438	2.79891e-21	1.03309e-18	79.4536	9.46998				LRRC32	842.465	821.591	1000.2	1070.82	-1.28421	-0.360881	6.09626e-12	7.50054e-10	933.77	-6.87738
CILP	447.324	623.853	218.092	274.65	1.82834	0.870533	4.01479e-21	1.44388e-18	390.98	9.43223				ARHGAP17	1105.21	952.959	1279.94	1176.04	-1.21543	-0.281462	1.78848e-11	2.10801e-09	1128.54	-6.72232
CD82	622.218	599.888	407.014	371.082	1.56257	0.643924	1.31626e-20	4.61548e-18	500.051	9.30689				ATP2B4	8537.28	8233.98	9909.08	9928.47	-1.19659	-0.25893	1.82747e-11	2.136e-09	9152.2	-6.71918
GCNT1	648.811	617.232	360.903	354.542	1.63699	0.711043	1.77258e-20	6.06397e-18	495.372	9.27522				SNTB1	396.445	407.352	565.163	584.669	-1.39011	-0.475195	2.57367e-11	2.93482e-09	488.407	-6.66911
NEXN	1588.04	1742.68	1059.76	1238.73	1.3874	0.47238	3.71987e-20	1.24226e-17	1407.3	9.19587				RAB3B	3123.79	2639.25	3784.42	3388.79	-1.26193	-0.335627	5.04198e-11	5.5249e-09	3234.06	-6.56969
ENPP1	884.395	735.101	425.967	311.204	1.7812	0.832853	1.27147e-19	4.14734e-17	589.167	9.0628				SLC7A14	671.775	507.564	874.676	788.992	-1.47029	-0.556097	1.05698e-10	1.12312e-08	710.752	-6.45857
HSD11B1	83.525	128.484	14.2142	28.4573	2.11465	1.08042	3.90742e-19	1.2179e-16	63.6702	8.93955				FZD7	1164.79	1024.66	1408.75	1316.01	-1.25927	-0.332583	1.12819e-10	1.18977e-08	1228.55	-6.44869
PRCP	2645.99	2684.23	2025.1	1929.77	1.36576	0.449708	4.276e-19	1.30381e-16	2321.27	8.92959				AJUBA	781.245	821.92	865.192	1009.99	-1.23875	-0.308888	1.27041e-10	1.31991e-08	869.588	-6.43067
SMARCD2	985.553	911.786	761.507	702.841	1.28439	0.361088	5.4132e-19	1.61544e-16	840.422	8.90346				BACH1	1559.73	1508.04	2023.79	1928.69	-1.27012	-0.344963	1.29529e-10	1.32611e-08	1755.07	-6.42772
PHLDB1	3361.58	3353.63	2766.05	2766.52	1.20253	0.266075	1.39073e-18	3.90128e-16	3061.95	8.79816				MAP2K3	857.771	800.431	1075.29	1059.42	-1.2818	-0.358172	1.40175e-10	1.41446e-08	948.229	-6.4157
LINC00968	636.694	783.983	316.322	447.88	1.64631	0.719235	1.64451e-18	4.52273e-16	546.22	8.77933				SHROOM3	1254.88	1071.95	1651.55	1421.8	-1.29487	-0.372804	1.60889e-10	1.61188e-08	1350.04	-6.39467
CCDC68	88.6111	96.2733	17.2131	20.9674	1.98264	0.987424	3.56752e-18	9.6227e-16	55.7662	8.6918				ATP13A3	3021.13	3260.37	3622.57	3862.2	-1.1745	-0.232042	1.70345e-10	1.69451e-08	3441.57	-6.38594
NID2	3324.57	2920.96	2302.57	2028.27	1.4114	0.497126	1.1027e-17	2.86417e-15	2644.09	8.56268				POU2F2	227.986	243.47	329.193	356.602	-1.41524	-0.501046	4.25131e-10	4.02897e-08	289.313	-6.24451
PTN	1547.12	1681.49	1211.41	1101.91	1.46635	0.552228	3.24272e-17	8.12186e-15	1385.48	8.43747				RAPGEF6	616.094	556.178	762.496	712.967	-1.25304	-0.325428	4.3847e-10	4.06952e-08	661.933	-6.23968
CHST2	527.188	523.313	336.665	347.932	1.49189	0.577141	1.69856e-16	4.10758e-14	433.775	8.24165				TNFRSF19	568	510.17	714.226	677.925	-1.32267	-0.403449	4.36776e-10	4.06952e-08	617.58	-6.24028
MT2A	1469.25	946.715	898.086	548.861	1.58272	0.662403	2.69946e-16	6.41739e-14	965.728	8.18605				SAMD4A	1376.87	1520.04	1542.65	1777.87	-1.17421	-0.231689	5.78031e-10	5.23063e-08	1554.36	-6.19631
ABCA8	316.407	528.723	189.817	260.935	1.73745	0.796968	4.22288e-16	9.87169e-14	323.97	8.13199				CNTN3	290.324	236.919	391.174	341.426	-1.39155	-0.476693	6.37771e-10	5.69769e-08	314.961	-6.1808
ASPN	247.372	163.497	110.623	55.2545	1.8112	0.856945	5.4827e-16	1.24033e-13	144.187	8.10029				MARCH4	1074.9	1065.14	1290.95	1409.02	-1.29598	-0.374041	7.11913e-10	6.24081e-08	1210	-6.16342
TMEM184C	929.372	950.083	697.921	711.048	1.31577	0.395904	1.21538e-15	2.70586e-13	822.106	8.00288				ARL4C	584.958	612.087	711.439	808.264	-1.25182	-0.324025	9.2071e-10	7.87432e-08	679.187	-6.12258
DPY19L4	1674.74	1771.92	1273.38	1362.69	1.28092	0.357186	2.05768e-15	4.50954e-13	1520.68	7.93782				WLS	2050.41	2025.59	2481.22	2385.09	-1.18158	-0.240719	9.71327e-10	8.25687e-08	2235.58	-6.11405
NTN4	2729.27	3484.63	2131.75	2580.13	1.31007	0.389644	2.65399e-15	5.72689e-13	2731.44	7.90618				EPB41L2	2867.88	2747.76	3406	3276.61	-1.17621	-0.234143	1.46095e-09	1.21972e-07	3074.56	-6.04862
F10	1457.81	1671.26	1034.76	1114.3	1.43996	0.526026	3.64221e-15	7.62471e-13	1319.53	7.86666				TP53I11	749.762	758.782	914.631	973.144	-1.27206	-0.347164	1.48793e-09	1.2349e-07	849.08	-6.04567
OMD	177.752	244.624	108.859	113.426	1.79163	0.841269	5.38229e-15	1.11018e-12	161.165	7.81764				LY96	83.66	81.9483	127.369	144.428	-1.51994	-0.604014	1.53375e-09	1.26544e-07	109.351	-6.04078
PDGFD	376.255	671.84	240.374	337.162	1.71329	0.776771	6.01729e-15	1.22317e-12	406.408	7.80358				RCAN2	487.36	487.767	700.395	701.313	-1.33829	-0.420394	2.04129e-09	1.65498e-07	594.209	-5.99449
NABP1	1585.58	1684.09	1436.12	1271.48	1.29655	0.374675	6.73789e-15	1.35008e-12	1494.32	7.7893				NREP	962.695	832.75	1353.02	1182.36	-1.34097	-0.423275	2.08722e-09	1.68249e-07	1082.71	-5.99087
DNAJB4	1041.32	1141.2	798.612	819.681	1.37453	0.458941	1.1847e-14	2.2455e-12	950.204	7.71768				DUSP4	51.3898	50.6928	91.1409	97.5915	-1.55111	-0.633305	2.45707e-09	1.95812e-07	72.7037	-5.96429
GRIA1	416.667	540.684	257.875	343.817	1.53075	0.61424	1.70704e-14	3.19239e-12	389.761	7.67097				PLAU	1033.98	791.178	1302.37	1108.53	-1.34161	-0.423961	2.5411e-09	2.01364e-07	1059.01	-5.95879
ZHX3	2461.94	2386.01	2014.58	2005.62	1.19485	0.256826	2.31207e-14	4.26699e-12	2217.04	7.63196				MVP	3549.13	3234.96	3957.31	3625.67	-1.11687	-0.159468	2.71064e-09	2.13592e-07	3591.77	-5.94823
RGS2	320.787	249.299	179.282	116.01	1.69835	0.764131	2.97721e-14	5.42317e-12	216.344	7.59931				SH3BGRL3	8806.11	7584.77	9880.17	9323.36	-1.2083	-0.272975	3.14175e-09	2.4618e-07	8898.61	-5.92401
MAOA	159.006	171.397	64.3598	77.118	1.73772	0.797193	5.00488e-14	8.9998e-12	117.97	7.53179				MAMLD1	515.732	594.73	710.847	850.04	-1.36086	-0.444518	3.68215e-09	2.86921e-07	667.837	-5.89787
TENM3	578.504	571.255	340.192	336.876	1.56775	0.648699	5.20379e-14	9.23904e-12	456.707	7.5267				AKAP12	11613	10144.1	14044.1	12547.5	-1.20328	-0.266973	4.07109e-09	3.12028e-07	12087.2	-5.88128
S1PR1	152.875	146.464	69.795	68.5041	1.70591	0.770545	1.23671e-13	2.08989e-11	109.41	7.41279				PKP4	699.503	844.706	899.055	1092.41	-1.26127	-0.334882	6.50058e-09	4.82419e-07	883.919	-5.80334
COL8A1	1323.87	1199.36	981.975	803.407	1.40961	0.495295	1.77171e-13	2.95833e-11	1077.15	7.36498				KIF23	199.142	160.376	259.222	229.437	-1.36333	-0.447137	9.0141e-09	6.48368e-07	212.044	-5.74831
CD302	682.551	804.914	533.313	606.574	1.30883	0.388279	1.80846e-13	2.98418e-11	656.838	7.36224				PTPN13	2985.88	2979.79	3395.72	3363.34	-1.12956	-0.175761	1.05656e-08	7.56085e-07	3181.18	-5.72139
KIF26B	405.433	354.222	190.53	157.56	1.67561	0.744684	3.04827e-13	4.85853e-11	276.936	7.29225				SMARCA1	1353.14	1210.62	1481.86	1424.35	-1.17076	-0.227449	1.14374e-08	8.11282e-07	1367.49	-5.70791
CDC37L1	312.727	323.084	216.071	212.751	1.44671	0.532779	3.45989e-13	5.45263e-11	266.158	7.27517				NCS1	1081.95	1082.52	1218.03	1271.95	-1.15969	-0.21374	1.33856e-08	9.3873e-07	1163.61	-5.68107
PTK2B	205.263	226.12	150.45	133.306	1.55064	0.632862	4.76085e-13	7.33798e-11	178.785	7.23196				PKIG	763.829	683.566	956.621	882.384	-1.25184	-0.324056	1.6738e-08	1.15649e-06	821.6	-5.64272
THBS1	85621.6	80296.8	61254	60173.8	1.30039	0.37895	9.81062e-13	1.46387e-10	71836.5	7.13314				UNC13B	697.486	811.752	849.191	978.59	-1.2028	-0.266403	1.67077e-08	1.15649e-06	834.254	-5.64304
SFRP1	4225.11	4271.7	3675.86	3294.11	1.26428	0.338316	1.26606e-12	1.84976e-10	3866.7	7.09797				DNM1	1097.03	935.578	1487.04	1244.39	-1.31528	-0.39537	1.72447e-08	1.18566e-06	1191.01	-5.63759
TCN2	511.291	524.582	335.892	353.221	1.43127	0.517296	1.25596e-12	1.84976e-10	431.247	7.09907				TPBG	1703.08	1723.86	1928.72	2111.06	-1.2	-0.263029	2.45231e-08	1.64575e-06	1866.68	-5.57662
SQRDL	1126.29	1124.36	758.794	782.596	1.40156	0.487029	1.4365e-12	2.07716e-10	948.011	7.08049				JAK1	3347.58	3038.72	3741.8	3469.76	-1.13225	-0.179196	2.46917e-08	1.64917e-06	3399.46	-5.57543
STK24	2072.57	1943.7	1630.27	1453.82	1.3156	0.39572	1.46373e-12	2.09492e-10	1775.09	7.07788				PAM	9065.2	8779.93	10328.6	10221.1	-1.16506	-0.2204	2.60171e-08	1.7213e-06	9598.71	-5.56632
NRP2	502.088	556.182	365.87	397.033	1.38828	0.473295	1.48652e-12	2.10605e-10	455.293	7.07574				TMEM158	222.009	186.025	344.631	319.299	-1.41247	-0.498217	2.70561e-08	1.78164e-06	267.991	-5.55949
COL7A1	2907.65	2594.1	2428.54	2026.2	1.26343	0.33735	1.60224e-12	2.2473e-10	2489.12	7.06534				MLTK	2252.25	2130.76	2640.56	2543.85	-1.18485	-0.244708	2.84057e-08	1.85311e-06	2391.85	-5.55099
CASC10	336.243	394.132	280.216	274.542	1.39376	0.478985	1.75193e-12	2.40907e-10	321.283	7.05293				ARID5A	458.741	497.765	626.814	693.401	-1.33999	-0.422218	3.56633e-08	2.27233e-06	569.18	-5.51108
SAV1	1114.18	1014.46	894.921	820.77	1.22513	0.29294	2.01275e-12	2.74086e-10	961.081	7.0336				TMEM200A	583.433	520.519	733.659	695.737	-1.30975	-0.389288	3.58039e-08	2.27233e-06	633.337	-5.51039
METTL7A	440.176	442.476	344.672	290.581	1.43735	0.52341	2.53205e-12	3.35043e-10	379.476	7.00152				DPP4	5012.51	5401.08	5978.8	7011.97	-1.26444	-0.338504	4.21963e-08	2.66597e-06	5851.09	-5.4814
LMO4	725.056	670.143	536.477	510.739	1.28383	0.360454	3.2129e-12	4.1726e-10	610.604	6.96808				DPYSL3	3199.92	3250.2	3737.04	3881.92	-1.19025	-0.251269	4.4862e-08	2.80908e-06	3517.27	-5.47056
LTBP1	5121.11	4292.41	3894.99	3053.43	1.31677	0.397009	3.39252e-12	4.36546e-10	4090.48	6.96042				DSEL	1634.78	1754.58	2025.88	2040.09	-1.15591	-0.209029	4.47135e-08	2.80908e-06	1863.83	-5.47115
ABCA6	460.379	449.34	295.188	267.874	1.52485	0.608668	3.71124e-12	4.68954e-10	368.195	6.94776				EREG	155.638	156.091	226.4	229.176	-1.41648	-0.502306	5.19768e-08	3.21157e-06	191.826	-5.44441
NPR3	382.872	475.617	180.154	217.448	1.67322	0.742628	4.20479e-12	5.26575e-10	314.023	6.93012				HUNK	50.3267	52.093	104.725	101.445	-1.51861	-0.602756	5.98436e-08	3.63362e-06	77.1473	-5.41927
CRISPLD2	167.448	125.536	76.9052	61.5544	1.62979	0.70469	6.59034e-12	8.03793e-10	107.861	6.86627				TRIM2	1838.11	1872.31	2153.55	2231.83	-1.18874	-0.249438	6.08631e-08	3.6638e-06	2023.95	-5.41625
ATP1A2	71.2631	75.556	21.0212	25.0234	1.70652	0.771055	8.35838e-12	1.01064e-09	48.2159	6.83227				ENPP2	3158.57	2661.53	3676.6	3277.8	-1.24727	-0.318769	6.93189e-08	4.13674e-06	3193.63	-5.39293
EEF2K	750.45	684.449	548.403	483.314	1.37486	0.459288	1.24701e-11	1.49492e-09	616.654	6.77466				TCF7	394.239	271.315	517.959	385.616	-1.35637	-0.439746	6.96043e-08	4.13674e-06	392.282	-5.39219
ITGB5	4180.2	4269.35	3620.63	3563.5	1.20759	0.272135	1.39635e-11	1.65976e-09	3908.42	6.75828				CPM	52.6591	51.9262	116.886	110.178	-1.52568	-0.609454	7.35682e-08	4.31744e-06	82.9121	-5.38223
IRAK3	528.642	513.673	382.373	374.59	1.33593	0.417844	1.93712e-11	2.24546e-09	449.82	6.71069				SVIL	3602.81	3788	4243.45	4484.27	-1.18663	-0.246871	8.72892e-08	5.10133e-06	4029.63	-5.35137
PPAP2B	7842.95	9689.29	5981.49	7224.37	1.33592	0.417829	2.16078e-11	2.48419e-09	7684.52	6.69472				STK32B	489.056	507.213	579.311	678.543	-1.29618	-0.374262	9.27643e-08	5.3988e-06	563.531	-5.34036
NEBL	64.3908	57.1221	14.8047	11.5766	1.61717	0.693469	2.62208e-11	2.96591e-09	36.9735	6.66637				MAPRE2	552.484	504.477	745.525	664.856	-1.28713	-0.364152	9.81718e-08	5.66649e-06	616.836	-5.33008
NISCH	2932.99	2745.07	2335.61	2235.69	1.20938	0.274269	2.64945e-11	2.9729e-09	2562.34	6.66484				PTDSS1	1302.33	1351.1	1536.81	1687.52	-1.22352	-0.291041	1.26565e-07	7.24571e-06	1469.44	-5.28375
CFH	1215.44	1288.73	1043.81	923.046	1.33774	0.419797	3.44488e-11	3.83476e-09	1117.76	6.62618				PAPSS2	2256.41	2193.21	2618.55	2499.53	-1.13927	-0.188113	1.36304e-07	7.77156e-06	2391.92	-5.27016
LEPREL1	160.2	182.603	97.2877	96.6746	1.59235	0.671155	4.33458e-11	4.78715e-09	134.191	6.59217				AKAP6	14.2095	9.73554	25.1479	32.212	-1.48597	-0.571408	1.39888e-07	7.9436e-06	20.3262	-5.2654
OXTR	921.867	881.169	686.259	607.234	1.41375	0.49953	5.71866e-11	6.21782e-09	774.132	6.55091				RGL1	789.691	804.014	880.792	998.743	-1.22314	-0.290586	1.46954e-07	8.31122e-06	868.31	-5.25634
ITGB3	940.558	994.215	721.063	738.473	1.31686	0.3971	7.65727e-11	8.26161e-09	848.577	6.50718				ANK1	327.902	279.807	413.905	390.878	-1.33087	-0.412373	1.56416e-07	8.81079e-06	353.123	-5.24484
HS6ST1	805.521	823.311	535.664	581.282	1.34827	0.431109	9.57252e-11	1.02492e-08	686.445	6.47355				LRRC15	639.278	442.693	760.727	636.635	-1.36835	-0.452439	1.6694e-07	9.32868e-06	619.833	-5.23282
LRCH2	311.041	332.956	224.858	218.529	1.43246	0.518498	1.16274e-10	1.21706e-08	271.846	6.44412				UACA	2511.42	2049.77	3153.17	2366.51	-1.15639	-0.209628	1.66918e-07	9.32868e-06	2520.22	-5.23285
HGF	181.036	209.654	140.148	114.523	1.56596	0.647047	1.28946e-10	1.32611e-08	161.34	6.42841				DOCK1	2253.95	2241.75	2514.08	2533.59	-1.12284	-0.167154	2.05116e-07	1.11944e-05	2385.84	-5.19464
CTSC	3434.18	3402.61	2659.9	2467.97	1.32002	0.40056	1.31697e-10	1.33853e-08	2991.17	6.4252				ARHGAP1	2535.76	2254.11	2702.53	2645.04	-1.15113	-0.203048	2.06518e-07	1.12234e-05	2534.36	-5.19337
ECM2	605.911	667.342	524.05	500.743	1.36644	0.450427	2.05856e-10	2.03334e-08	574.512	6.35691				ENC1	153.358	147.289	222.37	239.113	-1.4196	-0.505488	2.07249e-07	1.12234e-05	190.532	-5.19272
RBBP8	334.315	389.305	253.314	268.557	1.3875	0.472491	2.42914e-10	2.38259e-08	311.373	6.33142				CNTNAP1	999.672	826.4	1049.53	977.038	-1.17331	-0.23058	2.18144e-07	1.1768e-05	963.161	-5.18317
ABTB2	275.294	243.969	143.513	168.623	1.39639	0.481698	2.47548e-10	2.40763e-08	207.85	6.3285				TBC1D8	503.649	426.475	638.995	561.521	-1.30386	-0.382788	2.33797e-07	1.24214e-05	532.66	-5.17024
RPS6KA2	3444.42	3585.38	2838.26	2899.85	1.24227	0.312976	2.48899e-10	2.40763e-08	3191.97	6.32766				EPB41L3	1161.14	1075.67	1391.65	1308.03	-1.21745	-0.283866	2.89304e-07	1.50847e-05	1234.12	-5.13028
LGMN	1824.75	1726.95	1426.4	1399.2	1.22439	0.292065	2.5388e-10	2.43899e-08	1594.33	6.32461				BAALC	248.623	177.881	375.565	291.08	-1.42524	-0.5112	3.02437e-07	1.56531e-05	273.287	-5.12192
FLNB	2712.96	2933.71	2105.52	2174.07	1.3076	0.386921	3.39156e-10	3.23606e-08	2481.57	6.27973				SH3PXD2A	4205.78	4144.53	4440.92	4606.97	-1.11682	-0.159393	3.0726e-07	1.58442e-05	4349.55	-5.11894
PRSS23	7372.59	7168.1	6006.75	5653.89	1.27419	0.349577	4.3129e-10	4.05991e-08	6550.33	6.24226				RP11-253M7.1	52.7067	46.4268	76.296	80.8594	-1.45792	-0.543909	3.22957e-07	1.65926e-05	64.0722	-5.10953
ENTPD4	1408.38	1452.39	1205.36	1208.18	1.18429	0.244021	4.41015e-10	4.06952e-08	1318.58	6.23877				CDH11	2607.9	2379.24	3027.7	2817.61	-1.17844	-0.236874	4.29763e-07	2.14514e-05	2708.11	-5.05528
ROR1	656.089	587.02	472.992	467.076	1.24927	0.321081	4.66287e-10	4.27461e-08	545.794	6.23005				FST	7108.87	6780.64	8002.29	8751.77	-1.22887	-0.297334	4.56105e-07	2.24468e-05	7660.89	-5.04391
PLCL1	58.4886	79.6617	39.6294	36.6532	1.62624	0.701544	4.87098e-10	4.43639e-08	53.6082	6.22321				CSRP2	200.64	192.497	286.193	282.085	-1.35167	-0.434748	5.29275e-07	2.57764e-05	240.354	-5.01538
PDIA5	800.756	775.641	631.491	604.741	1.25306	0.325451	6.27665e-10	5.64336e-08	703.157	6.18332				AP2M1	5415.74	5093.75	5866.51	5639.05	-1.10472	-0.143682	5.31597e-07	2.57999e-05	5503.76	-5.01454
SIX2	425.352	480.707	265.128	338.669	1.44392	0.529993	6.82559e-10	6.05922e-08	377.464	6.17008				SPHK1	219.272	160.038	257.967	238.525	-1.34935	-0.432259	6.08926e-07	2.91495e-05	218.951	-4.98836
CNN3	2979.57	2925.88	2395.12	2414.86	1.19733	0.259826	7.08045e-10	6.24081e-08	2678.86	6.16428				S1PR3	1665.32	1700.02	1914.35	2060.25	-1.22181	-0.289024	6.30349e-07	3.00723e-05	1834.99	-4.98168
PKDCC	179.488	183.862	99.1446	103.24	1.5429	0.625646	7.46176e-10	6.50054e-08	141.434	6.15597				ITPKB	217.981	238.31	293.154	323.459	-1.31517	-0.395252	6.63142e-07	3.11291e-05	268.226	-4.97186
RASL11A	73.7897	53.1242	27.129	20.636	1.61049	0.687497	8.76771e-10	7.5911e-08	43.6697	6.13037				MAP3K5	139.059	127.203	201.923	181.657	-1.36009	-0.443705	6.58663e-07	3.11291e-05	162.461	-4.97317
PTGS1	5032.45	4186.08	3945.62	3170.21	1.27813	0.354031	8.84232e-10	7.60873e-08	4083.59	6.12902				VWF	61.4077	51.2197	93.8512	88.7181	-1.44583	-0.5319	6.71266e-07	3.13839e-05	73.7992	-4.9695
TMEM109	1630.52	1851.34	1261.64	1532.79	1.20916	0.274005	1.01749e-09	8.59722e-08	1569.07	6.10664				LPPR4	126.483	160.258	192.87	242.223	-1.38032	-0.465002	7.08582e-07	3.30185e-05	180.459	-4.959
OGN	496.234	393.471	374.113	264.651	1.48577	0.571215	1.12722e-09	9.46731e-08	382.117	6.09027				NLRP1	999.383	957.174	1218.16	1144.64	-1.18177	-0.240946	7.14037e-07	3.30531e-05	1079.84	-4.95751
FAM20B	3854.4	4256.14	3150.78	3528.89	1.20845	0.273154	1.94262e-09	1.5934e-07	3697.55	6.00253				SIPA1L1	1173.99	1089.09	1349.17	1313.41	-1.19637	-0.25867	7.18476e-07	3.31492e-05	1231.42	-4.9563
ATP1A1	5631.43	5504.55	4625.23	4597.36	1.18196	0.241185	2.02249e-09	1.64927e-07	5089.64	5.99599				MYO10	1112.32	944.487	1428.78	1217.65	-1.26866	-0.343307	7.33046e-07	3.37105e-05	1175.81	-4.9524
GLRX	1313.24	1196.12	956.342	898.699	1.29056	0.367992	2.12978e-09	1.70699e-07	1091.1	5.98759				SLC16A2	976.972	862.06	1158.14	1075.19	-1.20991	-0.274902	7.6315e-07	3.47531e-05	1018.09	-4.94456
APRT	629.78	637.598	493.421	476.143	1.31263	0.392462	3.82317e-09	2.96264e-07	559.236	5.89167				NFATC4	3451.42	3619.01	4104.02	4307.53	-1.20252	-0.266066	7.81684e-07	3.54819e-05	3870.5	-4.93989
SSB	1163.05	1202.52	1017.61	1006.31	1.18358	0.24316	4.00224e-09	3.08437e-07	1097.37	5.8841				FABP3	4875.89	5145.19	5885.65	6509.72	-1.24576	-0.317021	8.03239e-07	3.63427e-05	5604.11	-4.93458
GPM6B	318.774	280.746	202.713	151.14	1.51022	0.594758	4.17365e-09	3.1815e-07	238.343	5.87716				PRPS1	341.092	312.606	454.139	420.471	-1.29026	-0.367658	8.06646e-07	3.63795e-05	382.077	-4.93375
SORT1	673.619	779.667	507.044	574.259	1.32096	0.401585	4.24169e-09	3.21589e-07	633.647	5.87448				TMEM173	751.518	724.614	954.756	942.708	-1.27166	-0.346711	8.10564e-07	3.6439e-05	843.399	-4.93281
ERRFI1	953.504	888.467	745.018	658.384	1.30227	0.381032	4.64319e-09	3.50137e-07	811.343	5.85948				RAB31	1448.04	1455.18	1727.01	1806.39	-1.20071	-0.263891	8.31596e-07	3.72651e-05	1609.16	-4.9278
STON1	1204.64	1194.8	813.443	817.641	1.37997	0.464642	4.96631e-09	3.725e-07	1007.63	5.8483				NYNRIN	2106.67	2106.41	2506.4	2590.68	-1.21873	-0.285382	8.6341e-07	3.85675e-05	2327.54	-4.92046
PDZRN3	1799.32	1770.78	1306.25	1297.97	1.30642	0.385613	5.70959e-09	4.25972e-07	1543.58	5.82505				GPSM2	673.478	659.778	834.132	803.82	-1.22562	-0.293517	9.07129e-07	4.03917e-05	742.802	-4.91078
DAPK1	581.364	673.678	397.04	495.378	1.34289	0.42534	6.83197e-09	5.04343e-07	536.865	5.795				SBF2-AS1	313.484	293.034	450.831	396.513	-1.29158	-0.36914	1.02061e-06	4.51578e-05	363.465	-4.88762
DCLK1	545.809	508.64	402.145	362.258	1.37791	0.462478	6.88833e-09	5.05841e-07	454.713	5.79362				FGF13	68.3296	64.6359	119.338	106.652	-1.42555	-0.511516	1.04467e-06	4.60772e-05	89.7388	-4.88303
KCNIP3	326.285	336.185	214.184	242.333	1.34334	0.42582	7.29557e-09	5.32957e-07	279.747	5.78398				ATP8B1	1530.49	1589.39	1784.53	1830.03	-1.14524	-0.195654	1.20613e-06	5.30317e-05	1683.61	-4.85463
PPP3CA	1241.14	1156.06	967.761	947.286	1.20193	0.265356	7.59464e-09	5.5193e-07	1078.06	5.77722				LINC00341	374.242	313.842	449.02	402.356	-1.24806	-0.319685	1.29406e-06	5.60198e-05	384.865	-4.84066
AFAP1L1	234.721	290.522	160.828	192.43	1.43163	0.517658	8.35925e-09	6.04365e-07	219.625	5.76105				MAP3K7CL	117.09	153.928	171.315	210.315	-1.30971	-0.389248	1.42491e-06	6.11186e-05	163.162	-4.82149
SCARA5	284.183	316.965	240.42	197.902	1.43575	0.521803	1.14526e-08	8.11282e-07	259.867	5.70768				SNX30	632.273	566.209	736.659	678.625	-1.1848	-0.244647	1.45467e-06	6.2016e-05	653.441	-4.81736
SEC14L2	205.266	167.701	117.558	100.027	1.44921	0.535268	1.31156e-08	9.2442e-07	147.638	5.68455				DNAJC13	2373.87	2554.4	2644.48	2885.92	-1.12333	-0.167785	1.5413e-06	6.55101e-05	2614.67	-4.8058
B3GALT2	40.0083	53.0479	20.1367	15.7493	1.57244	0.653006	1.41084e-08	9.84501e-07	32.2356	5.67207				QPRT	1763.08	1429.78	1816.24	1700.09	-1.17675	-0.23481	1.614e-06	6.81864e-05	1677.3	-4.79658
SUN2	1806.25	1845.15	1479.05	1551.27	1.19778	0.260364	1.76395e-08	1.20688e-06	1670.43	5.63369				WDR26	2264.33	2232.92	2548.56	2518.02	-1.11977	-0.163199	1.69751e-06	7.14992e-05	2390.96	-4.78646
SH3RF3	316.534	334.362	245.951	238.7	1.33728	0.419307	1.78358e-08	1.21439e-06	283.887	5.63178				SERPINB7	125.885	74.2927	187.302	126.508	-1.4212	-0.507113	1.92348e-06	7.98521e-05	128.497	-4.7613
TACC1	2051.28	2115.16	1606.69	1628.15	1.26391	0.337898	1.79961e-08	1.21939e-06	1850.32	5.63024				SELENBP1	558.192	463.202	681.619	584.465	-1.23527	-0.304821	1.97055e-06	8.11787e-05	571.869	-4.75642
ARL6IP5	3411.16	3532.42	3074.34	3080.79	1.14169	0.19117	2.02439e-08	1.3651e-06	3274.68	5.6099				USP53	4489.24	5424.42	5424.56	6556.02	-1.20233	-0.265836	2.11295e-06	8.61518e-05	5473.56	-4.74231
LOX	34990.2	36409	29683.5	29924.9	1.20912	0.273958	2.57714e-08	1.71312e-06	32751.9	5.56798				PTEN	1813.89	1601.72	2082.23	1868	-1.15992	-0.214023	2.15755e-06	8.77153e-05	1841.46	-4.73808
XYLT1	1011.39	903.837	786.695	736.009	1.2061	0.270355	2.73645e-08	1.79353e-06	859.484	5.55751				C3	75.0907	80.6413	107.304	125.494	-1.40296	-0.488479	2.17932e-06	8.83442e-05	97.1325	-4.73604
IL20RB	567.171	614.112	501.599	505.267	1.24472	0.315825	3.01674e-08	1.94553e-06	547.037	5.54046				AMOTL1	1810.52	1833.46	2113.46	2187.16	-1.17626	-0.234213	2.31336e-06	9.35079e-05	1986.15	-4.72392
SLC1A5	4022.08	4340.39	3217.52	3479.28	1.22412	0.291739	3.02385e-08	1.94553e-06	3764.82	5.54005				SDCBP	3336.95	3341.89	3711.58	3768.05	-1.13286	-0.179966	2.43146e-06	9.76085e-05	3539.62	-4.71379
SYBU	97.591	83.6741	66.2634	49.5368	1.48614	0.571567	3.02103e-08	1.94553e-06	74.2663	5.54021				FMNL1	199.626	173.365	245.083	235.409	-1.29679	-0.374944	2.51433e-06	0.000100188	213.371	-4.70696
MRC2	13449.2	12026.1	11796.7	10241.6	1.17139	0.228225	3.49454e-08	2.2381e-06	11878.4	5.51466				GRB10	708.81	682.658	866.274	815.328	-1.18118	-0.240232	2.54914e-06	0.000101001	768.267	-4.70416
ENTPD6	953.89	961.746	804.441	808.316	1.17917	0.237776	4.58107e-08	2.85574e-06	882.098	5.46685				MAP1B	5958.23	6357.97	6288.93	7233.54	-1.14373	-0.193749	2.66638e-06	0.000104758	6459.67	-4.69498
NRP1	3992.45	3518.84	3273.03	2840.83	1.22015	0.287063	4.79996e-08	2.97895e-06	3406.29	5.45857				NTRK2	79.0482	99.9085	140.582	177.191	-1.43947	-0.525542	3.15583e-06	0.000122954	124.182	-4.66041
PEMT	255.883	264.108	184.676	182.625	1.35925	0.442814	5.36472e-08	3.30025e-06	221.823	5.43878				EIF4G2	13451.7	13816.5	14343.4	15064.7	-1.09311	-0.128444	3.32876e-06	0.000129333	14169.1	-4.64942
ITGA5	6360.83	5851.29	5507.34	5114.59	1.136	0.183961	5.7292e-08	3.50586e-06	5708.51	5.42705				SLC2A1	674.652	816.678	767.942	953.19	-1.17568	-0.233496	3.38068e-06	0.000130987	803.116	-4.64622
PRKAG2	266.212	277.207	211.329	202.251	1.31587	0.396017	5.74894e-08	3.50586e-06	239.25	5.42644				DAB2IP	1266.84	1253.07	1423	1469.5	-1.16966	-0.226094	3.5842e-06	0.00013849	1353.1	-4.63414
RGCC	494.954	451.966	214	195.172	1.53946	0.622428	6.07593e-08	3.6638e-06	339.023	5.41655				CABLES1	392.383	416.383	453.893	517.752	-1.22865	-0.297071	3.74623e-06	0.000143958	445.103	-4.62499
SLC35A3	458.862	531.334	371.459	416.2	1.25227	0.324542	6.54472e-08	3.92292e-06	444.464	5.40324				ADORA1	34.413	32.4312	50.6586	60.4599	-1.44516	-0.531231	3.94187e-06	0.000149834	44.4907	-4.61442
FBN2	8634.81	8997.43	6468.88	7066.68	1.24345	0.314352	7.33244e-08	4.31744e-06	7791.95	5.38283				PTPRK	1513.4	1439.29	1675.86	1627.42	-1.13634	-0.184399	4.09094e-06	0.000154662	1563.99	-4.60671
RNF24	1584.88	1499.68	1181.42	1163.5	1.25147	0.323618	7.34582e-08	4.31744e-06	1357.37	5.3825				CTNNA1	6372.05	6331.94	6629.3	6920.63	-1.09169	-0.126559	4.40227e-06	0.000163833	6563.48	-4.59143
COL5A2	13051.7	10890.3	11227.5	9459.5	1.15803	0.211676	9.63467e-08	5.58412e-06	11157.3	5.33348				DAB2	4253.85	4393.92	4920.49	4926.96	-1.11601	-0.158354	4.40361e-06	0.000163833	4623.81	-4.59136
ACKR3	443.027	486.074	303.073	332.891	1.39838	0.48376	1.16177e-07	6.67828e-06	391.266	5.29941				LUM	19868.1	21638.2	24138	26156.5	-1.1741	-0.231554	4.38866e-06	0.000163833	22950.2	-4.59207
ISL2	109.689	132.051	77.3898	73.6584	1.47802	0.563666	1.72878e-07	9.62218e-06	98.1969	5.22636				WNT2	2384.77	2805.56	3170.4	3578.85	-1.24631	-0.317668	4.48412e-06	0.000166387	2984.89	-4.58758
NEGR1	1059.97	1478.96	860.536	1180.36	1.22251	0.289843	1.80562e-07	1.00101e-05	1144.95	5.21831				ZBTB2	472.354	420.282	594.603	498.856	-1.17499	-0.232646	4.56449e-06	0.000168478	496.524	-4.58387
NR2F1-AS1	295.297	304.523	227.967	207.387	1.3625	0.446257	1.83776e-07	1.01482e-05	258.793	5.21504				ENTPD7	180.703	190.466	253.342	261.838	-1.29865	-0.377018	4.66097e-06	0.000171587	221.587	-4.5795
ITPR1	142.986	159.084	95.1277	97.8004	1.44203	0.528105	1.91008e-07	1.05062e-05	123.75	5.20788				CA12	520.587	534.276	681.102	677.925	-1.2367	-0.306499	5.27631e-06	0.000193732	603.472	-4.55349
FGD4	570.013	614.897	452.676	490.906	1.2497	0.321586	1.98547e-07	1.08782e-05	532.123	5.20069				GRIK2	418.101	395.48	504.391	488.658	-1.21763	-0.284079	5.72767e-06	0.000209209	451.657	-4.5362
HPS5	576.628	644.168	414.996	472.857	1.28258	0.359051	2.19809e-07	1.17765e-05	527.163	5.18175				OSBPL3	1869.78	1787.79	2192.84	2012.28	-1.11458	-0.156504	6.50882e-06	0.000235438	1965.67	-4.50915
PRSS12	3532.2	3915.29	3131.06	3235.29	1.19432	0.256187	2.20659e-07	1.17765e-05	3453.46	5.18103				FAM102A	967.357	887.126	1101.89	1066.2	-1.18322	-0.242722	6.78366e-06	0.000244595	1005.64	-4.50037
STC2	7539.35	8294.72	5941.69	6669.09	1.22334	0.290828	2.20821e-07	1.17765e-05	7111.21	5.1809				PIK3R2	1511.98	1567.22	1671.68	1764.19	-1.11453	-0.156438	7.05425e-06	0.000253051	1628.77	-4.49205
TYRO3	530.195	568.116	420.664	434.426	1.26347	0.337396	2.49343e-07	1.31973e-05	488.35	5.15819				ITGA7	292.938	295.107	345.435	371.052	-1.30111	-0.379745	7.24281e-06	0.000259152	326.133	-4.48643
ANXA2	27190.8	23883.4	24198.4	21716.8	1.08634	0.119472	2.62276e-07	1.37977e-05	24247.3	5.14872				AKAP2	3285.05	3223.92	3763.97	3690.17	-1.14453	-0.194749	8.3304e-06	0.000295803	3490.78	-4.45651
MBNL1	3533.48	3566.39	3190.22	3223.72	1.10954	0.14996	2.62655e-07	1.37977e-05	3378.45	5.14845				CNIH3	71.802	55.2167	118.394	96.7679	-1.38342	-0.468239	8.78074e-06	0.000311007	85.5451	-4.44521
CYP1B1	5302.77	6777.78	4301.73	5232.92	1.30824	0.387624	2.70208e-07	1.41415e-05	5403.8	5.14312				TMEM130	92.9367	61.1851	138.362	97.8963	-1.38816	-0.473178	8.94349e-06	0.000314389	97.5951	-4.44126
ITGA4	1413.51	1372.68	1018.28	1051.84	1.26018	0.333627	2.90605e-07	1.50964e-05	1214.08	5.12944				FEM1C	568.001	537.675	676.174	646.977	-1.18686	-0.247151	9.40148e-06	0.000328023	607.207	-4.4305
FAM198B	1521.14	1903.68	948.828	1270.84	1.39424	0.479475	3.38591e-07	1.73324e-05	1411.12	5.10059				LACC1	617.761	665.328	811.275	938.643	-1.31167	-0.391408	9.57508e-06	0.000333251	758.252	-4.42655
STIM1	1531.96	1450.84	1211.23	1200.31	1.20221	0.265692	3.47627e-07	1.77302e-05	1348.59	5.09561				COLGALT2	56.8744	61.9023	118.62	107.452	-1.39772	-0.483074	1.05873e-05	0.000366659	86.2123	-4.40482
COL3A1	62796.9	44450.4	45216.3	33154.3	1.29829	0.376615	3.51825e-07	1.78793e-05	46404.5	5.09333				EXT1	3839.62	3641.67	4234.04	4124.01	-1.12897	-0.175005	1.06403e-05	0.000366686	3959.83	-4.40373
FOXO1	159.795	195.676	117.546	132.435	1.38796	0.472962	3.5618e-07	1.80353e-05	151.363	5.091				CEP170	1922.02	1835.59	2317.18	2140.32	-1.16002	-0.214147	1.20203e-05	0.000409217	2053.78	-4.37722
RP11-443P15.2	212.907	289.414	171.797	211.482	1.32397	0.40487	4.06383e-07	2.05033e-05	221.4	5.06594				LOXL1	2782.75	2650.87	3386.37	3455.28	-1.23248	-0.301564	1.32618e-05	0.000443938	3068.82	-4.35574
OR7E47P	22.6983	28.3734	6.64644	7.43503	1.4475	0.533559	4.14766e-07	2.08513e-05	16.2883	5.06205				ACPP	11.7264	10.3364	32.2563	32.9973	-1.3348	-0.416625	1.45468e-05	0.000483491	21.8291	-4.33544
FSTL1	35371.7	36432.8	30599.5	30854.2	1.18051	0.239411	4.2884e-07	2.14514e-05	33314.6	5.05569				SOD3	1468.72	1773.13	1716.17	2531.79	-1.32917	-0.410528	1.45881e-05	0.00048372	1872.46	-4.33482
NQO1	6948.77	7667.81	5763.67	5971.75	1.23837	0.308442	4.33254e-07	2.1549e-05	6588	5.05373				CDCP1	74.4762	58.1672	130.694	102.555	-1.39206	-0.477223	1.46806e-05	0.000485637	91.4733	-4.33343
PRICKLE2	639.644	588.043	484.066	446.62	1.26709	0.341517	4.42727e-07	2.19424e-05	539.593	5.0496				GNPTAB	901.596	1030.47	1074.91	1204.87	-1.15694	-0.210316	1.54202e-05	0.000505336	1052.96	-4.3226
DSP	1148.02	1117.61	931.963	921.706	1.19126	0.252484	4.4886e-07	2.2168e-05	1029.82	5.04698				RND3	5998.9	5636.71	7120.1	6741.76	-1.17062	-0.227275	1.57746e-05	0.000514546	6374.37	-4.31758
GBE1	2278.14	2539.34	2002.11	2096.25	1.20253	0.266072	4.59788e-07	2.25489e-05	2228.96	5.04238				ARF6	1034.54	1035.89	1161.66	1217.36	-1.15269	-0.205008	1.64144e-05	0.000531706	1112.36	-4.3088
FN1	401254	393147	344655	328292	1.20666	0.271019	4.69701e-07	2.29548e-05	366837	5.03829				TUFT1	292.266	338.624	332.317	420.67	-1.23	-0.298656	1.67505e-05	0.000541342	345.969	-4.30431
TNPO1	5328.75	5706.75	4756.88	5047.61	1.12782	0.173538	5.39775e-07	2.61065e-05	5210	5.01161				IRF2BP2	954.345	988.086	1082.43	1121.98	-1.12682	-0.172256	1.72241e-05	0.000554094	1036.71	-4.29814
CDKL1	166.815	149.986	103.942	103.569	1.3631	0.446887	5.54944e-07	2.67479e-05	131.078	5.00627				CTSK	11119	14128.7	12543.7	17323.1	-1.19574	-0.257909	1.76667e-05	0.000567034	13778.6	-4.29251
HLX	123.332	143.713	77.5776	93.2938	1.41263	0.498384	5.70896e-07	2.74226e-05	109.479	5.00081				SLIT2	2214.12	2084.81	2591.58	2531.11	-1.19572	-0.257883	1.80169e-05	0.000575639	2355.41	-4.28815
MBNL2	921.025	889.606	699.465	710.929	1.23279	0.301932	6.59379e-07	3.11291e-05	805.256	4.97296				PALLD	5573.77	5904.76	6198.44	6605.94	-1.11652	-0.159011	1.8229e-05	0.000581091	6070.73	-4.28555
TBC1D16	2052.36	1899.48	1715.32	1656.06	1.14442	0.194617	6.63596e-07	3.11291e-05	1830.81	4.97173				ASS1	1555.78	1375.76	1736.82	1600.82	-1.17584	-0.233689	1.86333e-05	0.000592632	1567.29	-4.28067
TFPI	2036.43	2163.86	1815.29	1948.32	1.11283	0.154229	6.62576e-07	3.11291e-05	1990.97	4.97202				SYNC	1410.07	1318.24	1595.89	1498.18	-1.12589	-0.171071	1.97613e-05	0.000618686	1455.59	-4.26757
AC026703.1	106.588	131.821	42.7859	49.4192	1.49344	0.578641	7.10966e-07	3.30199e-05	82.6536	4.95834				CNST	426.283	408.52	539.296	510.427	-1.22874	-0.297174	2.05085e-05	0.00063711	471.131	-4.25928
PDE1A	231.28	221.206	171.583	155.067	1.36939	0.45353	7.4089e-07	3.39599e-05	194.784	4.95033				IRS1	1622.4	1662.87	1757.32	1900.34	-1.13571	-0.183599	2.06159e-05	0.00063832	1735.73	-4.25811
TMEM64	408.091	376.086	264.5	270.277	1.32152	0.402198	7.45227e-07	3.40474e-05	329.739	4.94919				VPS53	578.156	571.789	578.455	662.811	-1.14675	-0.197552	2.18994e-05	0.0006736	597.803	-4.24459
C8orf4	148.9	113.023	114.888	62.5536	1.43374	0.519786	9.14794e-07	4.06041e-05	109.841	4.90913				TP53INP2	693.937	642.515	791.478	766.199	-1.17315	-0.230384	2.28402e-05	0.000700999	723.532	-4.23515
NIPAL3	2461.12	2454.46	1975.46	2041.58	1.21583	0.281943	1.22999e-06	5.3912e-05	2233.15	4.85074				MEIS1	1142.83	1106.64	1285.79	1256.7	-1.13096	-0.177544	2.33727e-05	0.000714218	1197.99	-4.22997
PLEKHA5	749.548	733.289	580.424	578.079	1.23417	0.303536	1.23875e-06	5.4127e-05	660.335	4.84934				CASP1	139.337	156.99	191.821	212.743	-1.28764	-0.364726	2.47366e-05	0.000747724	175.223	-4.21719
NT5DC2	1564.71	1293.21	1199.49	1050.87	1.20732	0.271813	1.27973e-06	5.55711e-05	1277.07	4.84288				VAT1	11499.2	10632.3	11896.8	11842.7	-1.10886	-0.149081	2.47891e-05	0.000747724	11467.8	-4.21671
TMEM237	800.654	833.482	665.25	688.261	1.19823	0.260906	1.27582e-06	5.55711e-05	746.912	4.84348				OPTN	3384.68	3339.33	3679.06	3639.42	-1.09128	-0.126025	2.5043e-05	0.000753761	3510.62	-4.21441
RABGAP1	1638.2	1819.31	1400.43	1551.15	1.17138	0.228206	1.32803e-06	5.73136e-05	1602.27	4.83551				HMGA2	969.03	867.889	1139.06	1058.92	-1.20222	-0.265698	2.53956e-05	0.000762737	1008.73	-4.21126
PAPSS1	1232.25	1175.69	1081.74	1021.94	1.14001	0.189047	1.41253e-06	6.07735e-05	1127.91	4.82323				ABHD17C	228.724	222.621	309.529	287.693	-1.24682	-0.318259	2.59725e-05	0.000776738	262.142	-4.20618
NT5E	6518.54	6106.01	5767.83	5261.91	1.17241	0.229471	1.43746e-06	6.14689e-05	5913.57	4.81974				SLC1A3	65.1426	115.091	109.163	163.923	-1.32973	-0.411132	2.77091e-05	0.000823407	113.33	-4.19152
SGMS2	1509.97	1580.28	1286.22	1323.53	1.19976	0.262744	1.55675e-06	6.59666e-05	1425	4.80381				SLFN12	143.227	110.709	139.457	150.207	-1.29087	-0.368345	2.88964e-05	0.000853265	135.9	-4.18199
SNED1	919.073	713.471	718.479	551.277	1.24502	0.316173	1.72489e-06	7.24352e-05	725.575	4.78324				MAP2K6	39.4213	26.0599	62.6311	48.0634	-1.37247	-0.45678	2.92438e-05	0.000859901	44.0439	-4.17928
TSC22D3	804.227	933.743	641.189	727.953	1.2638	0.337763	1.76258e-06	7.3797e-05	776.778	4.7789				SEMA3D	1179.4	1460.39	1518.91	1849.21	-1.22555	-0.293427	2.92324e-05	0.000859901	1501.98	-4.17936
MFSD6	722.391	696.421	594.843	568.635	1.23201	0.301015	1.91063e-06	7.97574e-05	645.573	4.76265				ANKRD13A	2587.05	2304.67	2978.96	2624.42	-1.12172	-0.165716	2.96036e-05	0.000868661	2623.77	-4.17649
CHST3	1237.32	1330.72	1049.48	1092.14	1.20544	0.269556	1.92429e-06	7.98521e-05	1177.42	4.76122				TMEM35	143.484	111.667	210.881	171.499	-1.34852	-0.431381	3.06252e-05	0.000891181	159.383	-4.16877
MPZL1	2648.15	2680.27	2205.61	2273.62	1.16011	0.214263	1.9616e-06	8.11604e-05	2451.91	4.75734				ACO1	1758.89	1755.27	1869.82	1952.93	-1.10794	-0.147886	3.30272e-05	0.000957107	1834.23	-4.15152
LAMC1	24593.3	23874.1	21495.4	20883.9	1.13869	0.187377	1.97361e-06	8.11787e-05	22711.7	4.75611				CLMP	1786.32	1749.07	2110.88	2036.58	-1.16301	-0.217863	3.39325e-05	0.000975281	1920.71	-4.14533
ABLIM3	1982.07	1909.21	1642.2	1555.17	1.20142	0.264743	2.09772e-06	8.59871e-05	1772.16	4.74377				MTURN	666.42	692.219	767.687	792.874	-1.13978	-0.188749	3.40534e-05	0.000976755	729.8	-4.14451
SLC44A2	4240.85	4608.9	3813.01	4122.56	1.11897	0.16217	2.10278e-06	8.59871e-05	4196.33	4.74329				PPIF	337.497	343.576	382.757	416.788	-1.19187	-0.253226	3.63329e-05	0.00103969	370.155	-4.12964
SMPD1	2528.42	2544.44	2291.06	2309.11	1.11792	0.160816	2.37622e-06	9.57727e-05	2418.26	4.71847				SEPT9	7263.26	6588.95	8082.45	7602.96	-1.1354	-0.183204	3.63959e-05	0.00103969	7384.41	-4.12924
ETNK2	114.675	108.596	76.8613	62.5115	1.41956	0.50544	2.43569e-06	9.76085e-05	90.661	4.71344				PKM	19443.8	16939.1	20905.1	18674.8	-1.10548	-0.14467	3.64962e-05	0.00104044	18990.7	-4.12861
PPIC	963.49	967.843	849.163	798.036	1.22215	0.289416	2.51007e-06	0.000100188	894.633	4.70731				CHDH	108.487	116.799	138.588	160.046	-1.30225	-0.381012	3.76163e-05	0.00106803	130.98	-4.12165
P2RY1	22.7394	34.1018	10.0072	12.5077	1.47238	0.55815	2.52588e-06	0.000100363	19.839	4.70603				LY6K	161.11	114.608	209.931	161.743	-1.2812	-0.3575	4.95127e-05	0.00136975	161.848	-4.05792
EOGT	573.82	618.562	459.788	507.131	1.19962	0.262577	2.56601e-06	0.000101383	539.825	4.70281				EPB41	308.265	313.572	373.016	393.861	-1.22299	-0.290416	4.99125e-05	0.00137539	347.179	-4.05604
RGS11	407.946	428.326	366.281	347.79	1.24063	0.311076	2.61831e-06	0.000103158	387.585	4.69869				JAM2	135.761	150.664	165.43	211.603	-1.30598	-0.385138	4.98195e-05	0.00137539	165.864	-4.05647
PNMA2	328.394	294.173	293.766	229.558	1.30483	0.383867	2.95024e-06	0.000115587	286.473	4.67425				C16orf45	2334.04	2243.58	2653.62	2605.71	-1.15633	-0.209554	5.0856e-05	0.00139742	2459.24	-4.05166
KLF15	163.336	184.344	114.683	129.916	1.36081	0.44447	2.98652e-06	0.000116682	148.07	4.67174				KIAA1671	157.765	175.458	205.525	236.658	-1.27586	-0.351473	5.42943e-05	0.00148447	193.851	-4.03633
CAPS	287.822	255.419	244.713	196.83	1.26384	0.337809	3.60412e-06	0.000138877	246.196	4.633				AC027612.6	954.843	937.478	1040.08	1064.37	-1.13898	-0.187747	5.5267e-05	0.00150812	999.194	-4.03216
DFNA5	1049.14	1123.12	900.794	952.299	1.16641	0.222072	3.75665e-06	0.000143964	1006.34	4.62441				FER1L6	34.8683	22.3388	51.3606	54.1344	-1.36788	-0.451945	5.67015e-05	0.00154127	40.6755	-4.02613
KCNB1	263.291	383.858	157.359	252.944	1.38256	0.467339	3.81749e-06	0.000145897	264.363	4.62108				AKR1C1	1324.18	1701.49	1577.24	2112.7	-1.20515	-0.269209	5.71816e-05	0.00154832	1678.9	-4.02415
PLAT	1917.14	1633.98	1652.29	1175.39	1.25779	0.330888	3.89392e-06	0.000148413	1594.7	4.61697				DAPK2	257.058	206.079	329.65	279.474	-1.28038	-0.356575	5.80344e-05	0.00156838	268.065	-4.02066
PSD4	253.897	211.439	151.685	142.632	1.3344	0.416196	4.0455e-06	0.000153357	189.913	4.60903				STK17A	787.914	788.177	965.932	936.284	-1.16075	-0.215061	5.84624e-05	0.00157691	869.577	-4.01893
SLC1A4	487.395	518.449	376.193	408.969	1.23575	0.305389	4.14383e-06	0.00015624	447.751	4.60403				TSC22D1	1300.76	1301.62	1458.17	1481.07	-1.12336	-0.167824	5.89439e-05	0.00158381	1385.41	-4.017
ITPR2	292.179	294.286	228.212	218.27	1.27878	0.354767	4.18622e-06	0.000157415	258.237	4.60192				GNG12	5194.21	5189.53	5570.66	5653.33	-1.08267	-0.114599	5.93141e-05	0.00159071	5401.93	-4.01552
FRAS1	364.647	378.517	239.717	281.466	1.29221	0.369835	4.26437e-06	0.000159925	316.087	4.59806				ZFP91	1946.51	1950.19	2126.36	2201.88	-1.1274	-0.173004	6.037e-05	0.00161593	2056.23	-4.01136
TNS3	1325.39	1302.81	961.357	1003.96	1.23675	0.306559	4.55454e-06	0.000168478	1148.38	4.58433				IL6R	155.568	164.327	194.05	217.435	-1.25736	-0.330395	6.0711e-05	0.00162197	182.845	-4.01003
ARHGAP29	3934.93	4082.5	3562.98	3496.66	1.15692	0.210284	5.38634e-06	0.000197255	3769.27	4.54915				IGFBP3	4518.9	4886.76	6907.08	8751.59	-1.38323	-0.468038	6.3099e-05	0.00167937	6266.08	-4.00091
MICAL1	3127.64	3370.09	2858.07	2914.83	1.14241	0.192086	6.28695e-06	0.000229041	3067.66	4.5165				NARS2	150.282	156.245	188.577	202.501	-1.25313	-0.325538	6.93595e-05	0.00183554	174.401	-3.97847
MTHFD2	2059.07	1966.09	1665.31	1585.91	1.21896	0.285656	6.45259e-06	0.000234466	1819.09	4.51099				HMGA1	8300.99	6056.84	9808.24	8160.53	-1.23486	-0.304342	7.32524e-05	0.00192765	8081.65	-3.96547
CREB3L2	2277.22	2176.6	1872.67	1915.88	1.12583	0.170985	6.51291e-06	0.000235438	2060.59	4.50902				NME2	123.787	92.9428	119.524	132.74	-1.30448	-0.383471	7.3925e-05	0.00193808	117.248	-3.96329
ADRA1B	60.0239	54.649	27.5835	30.7499	1.41937	0.505254	7.02076e-06	0.000252495	43.2516	4.49306				SETD7	2906.64	3085.28	3076.79	3376.69	-1.08737	-0.120845	7.60448e-05	0.00198254	3111.35	-3.95653
AC093642.3	46.516	34.6486	30.8893	15.7751	1.38681	0.471773	7.26597e-06	0.000259319	31.9572	4.48574				SYNJ2	813.961	700.745	994.617	796.517	-1.12974	-0.175994	7.7117e-05	0.00200676	826.46	-3.95319
TINF2	655.578	703.997	598.947	598.318	1.17501	0.23267	7.66812e-06	0.000272977	639.21	4.47425				BZW2	577.812	523.391	708.604	621.421	-1.17909	-0.237673	7.83626e-05	0.00203486	607.807	-3.94935
COL15A1	1410.75	1134.47	1065.41	762.181	1.35522	0.43853	8.84511e-06	0.000312498	1093.2	4.44364				TRIM8	1931.96	2014.04	2135.98	2294.02	-1.11766	-0.160478	8.0649e-05	0.00208705	2094	-3.94246
TCEAL4	1665.7	1583.24	1412.88	1349.48	1.16562	0.221097	8.87805e-06	0.000312873	1502.83	4.44284				GLCE	425.771	419.917	507.223	497.908	-1.17546	-0.233221	8.11178e-05	0.00209532	462.705	-3.94107
ZDHHC3	1903.97	1947.1	1722.5	1746.19	1.11448	0.156367	8.96844e-06	0.000314478	1829.94	4.44066				HK2	313.843	355.665	407.058	448.255	-1.22364	-0.291183	8.22939e-05	0.0021179	381.205	-3.93762
ADPRH	106.764	107.404	68.893	69.8271	1.37511	0.459542	9.02738e-06	0.000315756	88.2222	4.43925				ADAMTS14	154.98	168.479	218.083	217.877	-1.25129	-0.323411	8.42429e-05	0.00216013	189.855	-3.932
SRI	850.934	863.003	780.869	752.373	1.14081	0.190062	9.91494e-06	0.000344225	811.795	4.41902				TRAK1	1507.67	1504.56	1788.99	1728.77	-1.13279	-0.179879	8.79826e-05	0.00225191	1632.5	-3.92155
ADAMTS2	1995.99	1663.11	1714.08	1465.14	1.13091	0.177478	1.06319e-05	0.000366686	1709.58	4.40391				FYCO1	1777.33	1848.56	1918.91	2050.13	-1.10725	-0.146977	8.87227e-05	0.00226671	1898.73	-3.91953
GALNT15	601.091	646.824	382.377	424.56	1.35979	0.443379	1.09987e-05	0.000378106	513.713	4.39655				LRRN4CL	1177.44	1294.76	1359.32	1594.81	-1.20157	-0.264921	9.04072e-05	0.00230555	1356.58	-3.91499
SGK1	952.046	931.396	787.429	737.464	1.23457	0.304014	1.11045e-05	0.000380811	852.084	4.39447				NTAN1	787.203	801.713	897.096	952.7	-1.18006	-0.238855	9.61169e-05	0.00243346	859.678	-3.90019
MORF4L2	3328.63	3276.15	3014.91	2914.37	1.118	0.160918	1.12442e-05	0.000384663	3133.52	4.39175				AKR1C3	283.538	314.27	355.409	398.433	-1.2385	-0.308598	9.65653e-05	0.00244041	337.912	-3.89906
VCL	11663.5	11598.1	10371.4	10412.7	1.11007	0.150657	1.12799e-05	0.000384944	11011.4	4.39106				CHD4	2821.18	2746	3086.78	3020.72	-1.09467	-0.130498	9.74229e-05	0.00245765	2918.67	-3.89692
PXDN	7765.24	7574.08	7235.96	6630.38	1.15002	0.201663	1.20495e-05	0.000409217	7301.41	4.37669				DSTYK	1061.86	998.853	1209.53	1148.71	-1.13659	-0.184713	0.000100665	0.00253488	1104.74	-3.88898
SLC22A15	156.275	174.95	117.64	122.74	1.31404	0.394013	1.25746e-05	0.000426017	142.901	4.36738				CTNNAL1	721.592	644.584	839.594	735.504	-1.14376	-0.19379	0.000102628	0.00256624	735.319	-3.88429
TGOLN2	5956.71	6390.17	5727.57	5923.68	1.07754	0.107738	1.26588e-05	0.000427835	5999.53	4.36592				TMEM132B	110.724	118.463	154.818	179.103	-1.32417	-0.40509	0.000103008	0.00256624	140.777	-3.88339
YEATS2	1016.65	1093.98	826.52	924.045	1.16895	0.22521	1.27186e-05	0.000428824	965.299	4.36489				FUT8	611.84	629.382	716.726	737.073	-1.16262	-0.21738	0.000103394	0.00257128	673.755	-3.88249
TRIM22	2481.12	2656.28	2245.95	2314.07	1.1424	0.192067	1.3046e-05	0.00043881	2424.35	4.35933				EVA1A	212.164	175.317	260.392	239.021	-1.25886	-0.332115	0.00010365	0.00257308	221.724	-3.88189
MANSC1	321.968	339.46	259.119	268.663	1.23312	0.302312	1.31363e-05	0.000440789	297.302	4.35782				C1orf198	1928	2125.45	2253.39	2525	-1.15978	-0.213855	0.000108713	0.00268026	2207.96	-3.87027
MYLK	5843.25	4619.28	4889.21	4101.15	1.16138	0.215835	1.34502e-05	0.000449174	4863.22	4.35265				SESN3	683.404	661.986	839.782	828.556	-1.23373	-0.30303	0.000108731	0.00268026	753.432	-3.87023
MATN2	1288.34	999.078	1039.65	758.35	1.23622	0.305933	1.36404e-05	0.000454443	1021.35	4.34957				FGF5	773.008	679.304	1033.29	839.526	-1.21057	-0.27569	0.000109294	0.00268939	831.281	-3.86898
ALDH1L2	3551.44	3187.64	3009.06	2629.44	1.20529	0.269375	1.47177e-05	0.000485718	3094.39	4.33287				AP1S2	392.241	369.92	395.299	449.105	-1.197	-0.259422	0.00011269	0.00276327	401.641	-3.86151
GPR4	74.8858	89.1812	50.3812	54.034	1.41077	0.496483	1.49035e-05	0.000490697	67.1206	4.33011				SH2D5	211.578	208.202	243.441	275.821	-1.24404	-0.315034	0.000114313	0.00279818	234.761	-3.85801
ANPEP	15936.6	12706.8	13928	10899.7	1.1583	0.21201	1.50023e-05	0.000492791	13367.8	4.32866				AKR1C2	439.989	532.076	540.702	659.878	-1.19388	-0.255659	0.000116277	0.00283722	543.161	-3.85385
C4orf3	1582.91	1466.37	1493.38	1268.49	1.14895	0.200312	1.57176e-05	0.000513881	1452.79	4.31838				STXBP5	701.472	669.965	791.674	773.638	-1.14801	-0.199135	0.000116313	0.00283722	734.187	-3.85377
POPDC2	22.6579	32.7946	8.75821	8.86583	1.38318	0.46799	1.5966e-05	0.000519579	18.2691	4.31492				TGM2	855.472	580.464	975.475	765.712	-1.25441	-0.327013	0.000118224	0.00286887	794.281	-3.84978
ELL2	2733.45	2917.33	2110.47	2362.58	1.19276	0.254306	1.63696e-05	0.00053148	2530.96	4.3094				TIMP3	17716.1	15053.2	21071.2	17929.1	-1.16656	-0.222256	0.000119369	0.00289165	17942.4	-3.84742
HIP1R	782.022	745.427	672.782	628.906	1.18389	0.243529	1.69223e-05	0.000545638	707.284	4.30205				C14orf37	298.59	275.765	325.921	332.208	-1.1877	-0.248177	0.000120286	0.00290384	308.121	-3.84554
CHST10	198.262	233.002	129.455	165.889	1.31087	0.390526	1.80125e-05	0.000575639	181.652	4.2882				FAM45A	1033.07	960.176	1120.67	1079.91	-1.11468	-0.156623	0.000124196	0.00298658	1048.45	-3.83769
PLTP	1100.49	1199.42	923.438	1024.97	1.15336	0.205839	1.87752e-05	0.000595793	1062.08	4.27898				BASP1	1378.4	1206	1497.27	1448.55	-1.16261	-0.217362	0.000125995	0.00302086	1382.56	-3.83416
TRAK2	1941.83	1970.33	1615.42	1717.67	1.13969	0.188642	1.91535e-05	0.000606425	1811.31	4.27454				DOCK4	94.1258	100.459	115.542	137.752	-1.29204	-0.369646	0.000127006	0.00303991	111.97	-3.83219
LAMA2	2545.5	2793.98	1821.67	2030.09	1.30431	0.383292	1.93154e-05	0.000610174	2297.81	4.27266				MAP4	10365.7	9537.59	10432.1	10318.1	-1.08016	-0.111239	0.000127936	0.00305695	10163.4	-3.8304
INTS8	809.991	817.986	725.212	693.778	1.15481	0.207658	1.94972e-05	0.0006138	761.742	4.27057				NLGN1	384.523	399.816	472.705	499.36	-1.20756	-0.272089	0.000130507	0.0031078	439.101	-3.8255
MT1E	162.135	114.325	123.562	77.6755	1.3122	0.391991	1.95177e-05	0.0006138	119.424	4.27034				TANGO6	221.489	252.734	255.941	316.63	-1.216	-0.282148	0.000131774	0.00313265	261.698	-3.82312
PRX	274.84	285.396	249.446	221.576	1.23981	0.310116	1.95963e-05	0.000614895	257.815	4.26944				NEDD4L	147.928	144.792	184.107	189.557	-1.26274	-0.336563	0.000134791	0.00319894	166.596	-3.81754
ACVRL1	1446.56	1434.33	1175.36	1140.27	1.22597	0.293918	1.9866e-05	0.000620581	1299.13	4.26639				AHNAK	42003.6	39573.8	42053.5	43748.6	-1.09752	-0.134246	0.000137956	0.00325204	41844.9	-3.81181
PTPRQ	55.3604	82.1433	28.1959	42.8952	1.41268	0.498432	1.99835e-05	0.000622865	52.1487	4.26507				RGS4	50.9845	42.2743	83.5211	70.3751	-1.34757	-0.430361	0.000138338	0.00325558	61.7887	-3.81112
SGCD	1564	1767.23	1250.7	1442.44	1.2107	0.275836	2.05314e-05	0.00063711	1506.09	4.25903				COL6A3	26457.2	19524.3	30061.6	24391.6	-1.20516	-0.269225	0.000141329	0.00331485	25108.7	-3.80583
LIN7A	273.621	276.656	162.539	184.375	1.33528	0.417141	2.18237e-05	0.000672745	224.298	4.24537				SLC6A6	819.569	797.591	966.135	923.712	-1.14658	-0.197343	0.000141199	0.00331485	876.752	-3.80606
PLEKHA1	569.119	626.325	507.215	510.653	1.20536	0.269459	2.18067e-05	0.000672745	553.328	4.24554				PINK1	1345.51	1294.22	1476.65	1470.87	-1.11642	-0.158882	0.000142132	0.00332812	1396.81	-3.80443
SOX13	254.186	246.299	193.735	183.57	1.27857	0.354531	2.29187e-05	0.000701873	219.448	4.23438				COL27A1	554.272	529.715	640.922	619.218	-1.16469	-0.219949	0.000144914	0.00337812	586.032	-3.79963
CSRP1	2630.24	2582.78	2307.82	2213.81	1.15896	0.212828	2.39294e-05	0.000729639	2433.66	4.22467				SLC16A7	225.952	230.58	273.327	283.65	-1.20449	-0.268423	0.000145231	0.00337812	253.378	-3.79909
STRADB	563.515	575.974	460.242	466.712	1.20808	0.272711	2.43058e-05	0.000739509	516.611	4.22115				WWC3	910.746	994.036	1036.34	1133.27	-1.13103	-0.177642	0.000147585	0.00342719	1018.6	-3.7951
MMP19	563.542	485.968	448.149	398.196	1.19809	0.260736	2.4657e-05	0.000747724	473.964	4.21792				RASSF8	1683.54	1629.08	1882.33	1855.23	-1.13731	-0.185624	0.000151599	0.00350301	1762.55	-3.78844
SLC1A1	370.542	344.174	312.454	278.921	1.21036	0.275437	2.47259e-05	0.000747724	326.523	4.21729				LATS2	1145.57	1142.61	1249.06	1343.56	-1.15362	-0.206166	0.000153542	0.00352469	1220.2	-3.78527
OLFML2B	399.528	427.567	306.692	300.912	1.29836	0.376685	2.57878e-05	0.000772862	358.675	4.20779				DIEXF	470.28	476.416	569.516	560.535	-1.15594	-0.209072	0.000156241	0.00357494	519.187	-3.78093
GEM	401.905	392.135	283.91	262.847	1.31769	0.398016	2.72097e-05	0.000812006	335.199	4.19564				SOCS2-AS1	21.8669	20.2749	49.0837	37.9317	-1.31893	-0.399371	0.000163457	0.00372182	32.2893	-3.76968
CLSTN1	3332.7	3373.09	3124.98	3064.12	1.09994	0.137422	2.75392e-05	0.000820095	3223.72	4.19292				KLHDC8B	251.724	226.049	281.712	279.315	-1.1944	-0.256283	0.000166311	0.00377455	259.7	-3.76536
PCDH18	7581.92	7010.2	6755.82	6268.54	1.12078	0.164498	2.80058e-05	0.000830463	6904.12	4.1891				DAAM2	771.57	733.665	838.609	903.369	-1.19161	-0.252911	0.000167179	0.00378813	811.803	-3.76406
GAS1	923.651	941.089	711.917	731.373	1.23034	0.299059	2.8081e-05	0.000830938	827.008	4.1885				SLC25A25	292.103	257.008	344.392	324.108	-1.22278	-0.290166	0.000167581	0.00379112	304.403	-3.76346
NAGS	42.5544	39.6152	22.1235	19.9295	1.39355	0.478764	2.99245e-05	0.000876244	31.0556	4.17404				MGAT5	1158.34	1219.67	1277.05	1357.69	-1.12444	-0.169211	0.000170163	0.00384333	1253.19	-3.75963
KCNT2	63.7666	53.1044	44.032	30.7751	1.36805	0.452124	3.02227e-05	0.000883133	47.9195	4.17178				FNIP1	1064.5	969.809	1150.17	1087.02	-1.10798	-0.147929	0.000171302	0.00386283	1067.88	-3.75796
ZDHHC9	1375.56	1291.01	1077.91	1079.72	1.16747	0.223379	3.05511e-05	0.000890872	1206.05	4.16932				GNAS	13701.6	12470.9	13818.5	13316.2	-1.0706	-0.0984258	0.000173665	0.00390638	13326.8	-3.75453
ALCAM	3166.62	3223.24	2715.09	2764.21	1.16029	0.214481	3.23754e-05	0.00094016	2967.29	4.15608				EMP1	3782.35	3306.23	4050.57	3651.95	-1.10097	-0.138772	0.000175191	0.0039264	3697.78	-3.75234
EPDR1	993.193	1061.42	859.4	920.298	1.17907	0.237654	3.32576e-05	0.000959816	958.577	4.14993				GCC2	759.465	727.565	813.262	826.695	-1.13675	-0.184916	0.000175748	0.0039264	781.747	-3.75155
SLC2A5	24.5912	34.8349	13.8404	16.193	1.41465	0.500447	3.32445e-05	0.000959816	22.3649	4.15002				OLFML2A	3795.53	4223.44	4962.56	5412.44	-1.29884	-0.377225	0.000175298	0.0039264	4598.49	-3.75219
COL4A1	3038.18	2611.19	2598.1	2299.2	1.13057	0.177047	3.34398e-05	0.000963093	2636.67	4.14868				DACT3	130.231	113.42	173.901	147.818	-1.24252	-0.313272	0.000177279	0.00395312	141.343	-3.74937
MATN3	47.0797	58.4697	33.0463	31.4673	1.40086	0.48631	3.67247e-05	0.00104483	42.5157	4.12718				PI4K2A	914.507	894.237	989.682	1016.58	-1.11824	-0.161233	0.000181183	0.00402738	953.752	-3.7439
BAIAP2	512.503	446.327	417.539	369.245	1.20599	0.270221	3.86007e-05	0.00109376	436.403	4.1157				CARHSP1	854.843	754.451	1023.84	911.546	-1.19459	-0.256511	0.000183584	0.00406143	886.17	-3.7406
EMC3	629.977	657.056	588.066	561.831	1.15952	0.213532	3.88247e-05	0.00109789	609.232	4.11436				TRERF1	821.881	692.779	900.992	786.868	-1.13015	-0.176512	0.00018468	0.00407926	800.63	-3.7391
KLF5	209.409	225.204	176.529	165.411	1.28884	0.366077	4.2821e-05	0.00120846	194.138	4.09171				NRG1	109.465	122.226	145.248	155.715	-1.25964	-0.333013	0.000185744	0.0040963	133.164	-3.73766
SPATS2L	2380.13	2414.73	2183.16	2191.27	1.10924	0.149577	4.32928e-05	0.00121933	2292.32	4.08917				PLCB1	518.622	519.678	620.72	614.229	-1.1624	-0.217106	0.000197455	0.00433412	568.312	-3.72225
GOLGA8B	1567.34	1582.84	1519.08	1306.53	1.20614	0.270393	4.47191e-05	0.00125697	1493.95	4.08164				TNFRSF21	293.328	274.653	362.279	334.807	-1.18703	-0.247361	0.000199596	0.00437426	316.267	-3.71953
B3GNT5	87.0118	72.9318	56.2732	46.4354	1.35821	0.441703	4.49426e-05	0.00126073	65.663	4.08048				ITGB8	161.934	211.227	205.4	266.794	-1.2404	-0.310809	0.00020309	0.00443008	211.339	-3.71514
ZFHX3	848.943	903.936	655.013	771.354	1.15641	0.209656	4.55902e-05	0.00127634	794.811	4.07715				PXK	1479.69	1276.22	1621.65	1442.96	-1.11752	-0.160297	0.000203013	0.00443008	1455.13	-3.71524
SFT2D2	984.833	906.623	819.283	779.69	1.15425	0.206959	4.59997e-05	0.00128524	872.607	4.07507				ZNF385A	388.921	439.502	446.131	533.806	-1.17997	-0.238755	0.000205481	0.00447528	452.09	-3.71218
GPR126	106.384	107.013	45.7417	52.0254	1.38092	0.465625	4.61135e-05	0.00128586	77.7908	4.0745				GXYLT2	95.9728	88.9464	110.109	119.41	-1.27607	-0.351704	0.000208721	0.00452477	103.609	-3.70822
RP11-558F24.4	30.9578	38.2953	28.9248	20.1974	1.38315	0.467961	4.81007e-05	0.00133861	29.5938	4.06467				KANK1	1175.02	1321.72	1345.04	1480.07	-1.10444	-0.143322	0.000211778	0.00458395	1330.46	-3.70454
RP11-597D13.9	167.192	174.276	114.517	127.733	1.29002	0.367398	4.8717e-05	0.00135308	145.929	4.0617				SLC20A1	1148.41	1135.94	1331.65	1359.31	-1.16691	-0.222691	0.000212179	0.00458555	1243.83	-3.70406
SSTR1	1007.09	1212.71	833.301	1022.65	1.2003	0.263392	4.9348e-05	0.00136789	1018.94	4.05869				OSBPL1A	1081.29	1034.12	1142.47	1162.76	-1.12142	-0.165332	0.000215125	0.00464207	1105.16	-3.70056
C15orf61	128.587	137.466	95.7554	98.0282	1.2983	0.376624	5.09114e-05	0.00139742	114.959	4.0514				DOCK7	1486.35	1465.61	1554.09	1636.33	-1.11158	-0.152613	0.000225388	0.00483378	1535.59	-3.68872
ADAM15	1390.77	1621.39	1196.8	1384.99	1.16132	0.215768	5.26832e-05	0.00144323	1398.49	4.04339				LSAMP	77.8549	65.5463	95.4655	103.483	-1.32851	-0.409804	0.000232326	0.00496739	85.5873	-3.68099
DTNA	192.525	203.97	130.344	145.426	1.32495	0.405942	5.57843e-05	0.00151928	168.066	4.02997				FBXL7	754.34	782.495	856.299	891.16	-1.13439	-0.181921	0.000233113	0.00496907	821.074	-3.68013
ENO1	7247.12	7082.92	6763.18	6429.21	1.09332	0.128715	5.71764e-05	0.00154832	6880.61	4.02417				RELN	24.781	20.1416	36.4175	36.3238	-1.32595	-0.40703	0.000232948	0.00496907	29.416	-3.68031
TNFAIP8L3	50.2125	55.4545	29.2804	33.0472	1.37247	0.456775	5.89257e-05	0.00158381	41.9987	4.01707				EFR3A	1443.43	1586.33	1584.23	1749.39	-1.09254	-0.127693	0.000236269	0.00502108	1590.85	-3.6767
REEP6	66.1808	52.6559	25.3844	22.5297	1.35859	0.442111	6.13625e-05	0.00163626	41.6877	4.00751				KRT19	2426.9	2028.31	2989.19	2285.34	-1.17177	-0.228688	0.000236234	0.00502108	2432.43	-3.67674
AZI2	1063.52	1013.69	937.969	894.259	1.12426	0.168977	6.339e-05	0.00168392	977.361	3.99982				STK17B	321.348	297.205	364.544	358.611	-1.18909	-0.24986	0.000252	0.00529918	335.427	-3.66022
GSR	739.315	807.878	667.962	709.024	1.13467	0.182277	6.75265e-05	0.00179041	731.045	3.98484				EYA1	104.28	98.4653	116.082	138.405	-1.28447	-0.361168	0.00025475	0.00534899	114.308	-3.65744
MOXD1	8529.91	7243.84	7384.7	6611.9	1.10472	0.143676	6.99339e-05	0.00184726	7442.59	3.97651				WNK1	3345.18	3386.06	3343.83	3653.74	-1.07378	-0.102702	0.000255132	0.005349	3432.21	-3.65705
FIBIN	167.47	152.976	104.12	103.315	1.31376	0.393706	7.29243e-05	0.00192262	131.97	3.96654				FAM86B1	134.438	115.713	169.927	152.647	-1.24435	-0.315392	0.000258442	0.00539421	143.181	-3.65375
GCNT4	341.425	365.521	272.891	296.775	1.22309	0.29053	7.34875e-05	0.00193022	319.153	3.9647				RABGEF1	1422	1290	1515.45	1512.11	-1.15788	-0.21149	0.000259852	0.00541558	1434.89	-3.65235
ERGIC1	4692	4986.02	4434.36	4622.49	1.08121	0.112646	7.49845e-05	0.00196219	4683.72	3.95989				LCNL1	31.6324	20.5664	44.6747	36.926	-1.31536	-0.395453	0.000261924	0.00545066	33.4499	-3.65031
ELF1	1027.35	1072.15	875.693	873.415	1.20012	0.26318	7.55879e-05	0.00197429	962.153	3.95797				LARP6	1127.95	1057.72	1326.14	1248.6	-1.16174	-0.216293	0.000267304	0.00552624	1190.11	-3.64508
P4HA3	136.633	97.0478	95.5382	64.988	1.31926	0.399727	7.8487e-05	0.00203486	98.5517	3.94897				MMP2	29023.2	29791.6	31688.8	34407	-1.1311	-0.177723	0.000267526	0.00552624	31227.6	-3.64487
CAV2	1659.75	1547.84	1489.34	1340.33	1.13466	0.18226	8.22123e-05	0.0021179	1509.32	3.93786				SYT7	87.6713	79.7361	130.365	115.309	-1.30337	-0.382251	0.000267387	0.00552624	103.27	-3.645
REPS2	22.3079	24.6957	11.2362	9.45607	1.3109	0.390559	8.27119e-05	0.00212476	16.924	3.9364				ZNF281	802.545	719.09	974.003	880.054	-1.1934	-0.255073	0.000267485	0.00552624	843.923	-3.64491
COX20	451.99	456.466	403.203	379.029	1.18162	0.240769	9.29021e-05	0.00236487	422.672	3.90842				COL13A1	199.276	172.982	241.173	219.938	-1.22411	-0.291735	0.000271689	0.00560088	208.342	-3.6409
CASP4	663.335	677.479	565.751	566.621	1.17673	0.234784	9.43564e-05	0.00239754	618.297	3.90466				IGFBP5	21294.5	29825.7	26777.5	38782.6	-1.26016	-0.333612	0.000272333	0.00560088	29170.1	-3.64029
AF131217.1	130.592	137.842	96.0611	98.5771	1.30345	0.382338	9.49248e-05	0.00240762	115.768	3.90321				FOLR3	20.0687	26.3851	47.0014	53.2779	-1.34713	-0.42989	0.000275719	0.00566213	36.6833	-3.63711
FAM101B	605.789	620.144	506.594	509.346	1.21444	0.28029	0.000101477	0.00255074	560.468	3.88703				C3orf58	330.404	350.294	384.629	420.303	-1.18185	-0.241045	0.000278504	0.00571096	371.408	-3.63452
HIGD1A	1012.13	1031.13	853.184	898.193	1.1416	0.191063	0.000102693	0.00256624	948.658	3.88414				CBX5	1489.73	1531.39	1650.14	1721.62	-1.11677	-0.159338	0.000279361	0.00572018	1598.22	-3.63372
SIDT2	816.683	774.41	711.99	671.495	1.13756	0.185938	0.000102841	0.00256624	743.644	3.88379				TTL	1079.71	1146.18	1189.92	1262.96	-1.09567	-0.13181	0.000283969	0.00580605	1169.69	-3.6295
UAP1	1253.99	1329.79	1118.19	1124.65	1.16046	0.214703	0.000102444	0.00256624	1206.66	3.88473				GPR176	2896.12	2879.68	3127.57	3084.82	-1.07985	-0.110826	0.000286664	0.00583563	2997.05	-3.62706
WNT5A	6184.63	6377.41	4830.04	5199.24	1.18319	0.242683	0.000104953	0.00260084	5647.83	3.87885				KIAA1199	10749.1	9370.32	13850.8	12423.5	-1.24191	-0.312556	0.000286487	0.00583563	11598.4	-3.62722
COL12A1	21113.7	23264.2	15786.2	18271.6	1.23437	0.303777	0.000107817	0.00266709	19608.9	3.87229				MAPKBP1	744.169	707.07	787.32	821.043	-1.14466	-0.19492	0.00029133	0.00592201	764.9	-3.62289
EIF1AX	1773.69	1901.51	1611.37	1697.9	1.1231	0.167486	0.000112214	0.00275642	1746.12	3.86254				CKS2	76.2761	61.1181	90.8093	86.0725	-1.28577	-0.362633	0.000295445	0.00597896	78.569	-3.61926
SMPDL3A	604.587	677.013	527.369	593.974	1.15669	0.210008	0.000116854	0.00284547	600.736	3.85263				PTPN14	2083.6	2107.94	2270.08	2367.34	-1.11229	-0.153528	0.000295836	0.00597896	2207.24	-3.61892
B3GNT1	469.768	567.296	437.502	488.089	1.15238	0.204614	0.000117974	0.00286778	490.664	3.8503				ZNF521	758.499	720.521	865.009	828.124	-1.15081	-0.202654	0.000306923	0.00617632	793.039	-3.60939
SEMA3E	28.0727	35.3735	13.7001	18.3178	1.3822	0.466967	0.000119584	0.00289186	23.866	3.84698				DHX9	1872.51	1864.2	1912.63	2065.93	-1.10187	-0.139949	0.00030899	0.00620903	1928.82	-3.60764
BTD	371.741	362.521	302.962	296.958	1.19616	0.258408	0.000122771	0.00295873	333.545	3.84053				ALDH9A1	1714.03	1509.34	1913.51	1688.69	-1.11094	-0.151786	0.000315845	0.0063106	1706.39	-3.60195
RBPJ	2224.16	2299.08	1948.4	2029.05	1.11287	0.154281	0.000124352	0.00298658	2125.17	3.83738				SERPINB2	783.955	1022.42	1046.83	1363.59	-1.26129	-0.3349	0.000331119	0.00656899	1054.2	-3.58965
[truncated: 274 more rows]

## Sheet: GSF-S_48h_1
	GSF.S_DHT_48h mean	GSF.S_DHT_72h mean	GSF.S_EtOH_48h mean	GSF.S_EtOH_72h mean	FoldChange	log2FoldChange	pvalue	padj	Overall mean	stat
[truncated: 787 more rows]

[truncated: 8 more sheets: GSF-S_48h_2, GSF-S_72h_1, GSF-S_72h_2, GSF-L.Min_48h_1, GSF-L.Min_72h_1, GSF-L.Maj_48h_1, GSF-L.Maj_72h_1, Log2fc 0.5]
